# Supplementary material for: A coordinated transcriptional switching network mediates antigenic variation of human malaria parasites
Source: eLife. 2022 Dec 14;11:e83840. doi: 10.7554/eLife.83840 (PMC9833823; doi:10.7554/eLife.83840)
Supplement: Supplementary file 1. — Genes upregulated in ‘singles’ are denoted in blue while those upregulated in ‘manys’ are denoted in green. log2 FC = logFold Change, logCPM = log(normalized mean Count per Million), LR = likehood ratio, FDR = adjust p value. [file elife-83840-supp1.xlsx]

## Sheet: Sheet1
Supplementary File 1: List of differentially expressed genes when comparing var2csa-mutant "single" lines to var2csa-mutant "many" lines at ring stages. Genes upregulated in "singles" are denoted in blue while those upregulated in "manys" are denoted in green. log2 FC=logFold Change, logCPM=log(normalized mean Count per Million), LR=likehood ratio, FDR= adjust p-value.
gene annotation number	log2FC	logCPM	LR	PValue	FDR
PF3D7_1038400	4.43217	3.62421	17.1607	3.43464e-05	0.00104258	up in var2csa-mutant singles
PF3D7_0525400	4.07349	2.4943	13.4593	0.000243792	0.00453375	up in var2csa-mutant singles
PF3D7_1221400	3.86407	1.9333	23.6903	1.1315e-06	6.73888e-05	up in var2csa-mutant singles
PF3D7_0507300	3.74618	4.2552	18.4372	1.75599e-05	0.000621198	up in var2csa-mutant singles
PF3D7_0501600	3.70912	6.08525	18.0184	2.18785e-05	0.000735273	up in var2csa-mutant singles
PF3D7_1036300	3.66547	4.18417	23.3677	1.3381e-06	7.67775e-05	up in var2csa-mutant singles
PF3D7_0929500	3.66106	3.07773	16.4476	5.00127e-05	0.00137608	up in var2csa-mutant singles
PF3D7_0214900	3.6565	7.2226	35.8416	2.14025e-09	8.20107e-07	up in var2csa-mutant singles
PF3D7_0400200	3.64535	5.96178	13.271	0.000269549	0.00484057	up in var2csa-mutant singles
PF3D7_1472600	3.62075	4.23915	20.1896	7.01318e-06	0.000299973	up in var2csa-mutant singles
PF3D7_1116000	3.61142	7.02157	37.9082	7.41547e-10	3.48898e-07	up in var2csa-mutant singles
PF3D7_0315600	3.6053	1.74712	14.2897	0.000156719	0.00321993	up in var2csa-mutant singles
PF3D7_1350800	3.5775	-1.07717	9.13929	0.00250178	0.0259842	up in var2csa-mutant singles
PF3D7_1332200	3.5737	5.10064	26.2143	3.05557e-07	2.26003e-05	up in var2csa-mutant singles
PF3D7_0722200	3.54239	7.60765	41.195	1.37776e-10	1.90648e-07	up in var2csa-mutant singles
PF3D7_0414800	3.54182	3.95169	16.8126	4.12583e-05	0.0011624	up in var2csa-mutant singles
PF3D7_0102500	3.54128	7.95577	35.497	2.55443e-09	8.5847e-07	up in var2csa-mutant singles
PF3D7_1335400	3.53958	8.714	40.7965	1.68933e-10	1.90648e-07	up in var2csa-mutant singles
PF3D7_1017100	3.53744	4.22546	14.883	0.000114389	0.00259104	up in var2csa-mutant singles
PF3D7_0217500	3.51667	6.10273	27.197	1.8374e-07	1.56235e-05	up in var2csa-mutant singles
PF3D7_1302100	3.51432	3.09857	15.0568	0.000104322	0.00241791	up in var2csa-mutant singles
PF3D7_0528400	3.50735	4.91029	18.1032	2.09251e-05	0.000718633	up in var2csa-mutant singles
PF3D7_0408700	3.50065	2.49046	11.2714	0.000787112	0.0107656	up in var2csa-mutant singles
PF3D7_0109100	3.4924	4.31154	19.8148	8.53181e-06	0.000361641	up in var2csa-mutant singles
PF3D7_0613300	3.49148	4.83145	19.5525	9.78748e-06	0.000395621	up in var2csa-mutant singles
PF3D7_1310200	3.48934	2.96697	15.3532	8.91697e-05	0.00212966	up in var2csa-mutant singles
PF3D7_1337800	3.47152	5.5404	16.3227	5.34201e-05	0.00143624	up in var2csa-mutant singles
PF3D7_0723300	3.46046	5.9095	33.5823	6.83126e-09	1.78562e-06	up in var2csa-mutant singles
PF3D7_0805300	3.4519	3.30841	13.2908	0.000266705	0.00481549	up in var2csa-mutant singles
PF3D7_0321400	3.44575	3.80536	15.9724	6.42726e-05	0.00165529	up in var2csa-mutant singles
PF3D7_1026500	3.43593	2.76063	20.5254	5.88457e-06	0.000263685	up in var2csa-mutant singles
PF3D7_0914100	3.4345	6.37257	27.9063	1.27338e-07	1.1992e-05	up in var2csa-mutant singles
PF3D7_1218000	3.43133	4.04431	15.7067	7.39621e-05	0.00182195	up in var2csa-mutant singles
PF3D7_1218100	3.42823	1.513	12.2759	0.000458835	0.00706507	up in var2csa-mutant singles
PF3D7_1252400	3.42688	5.66318	15.9601	6.46905e-05	0.00165529	up in var2csa-mutant singles
PF3D7_1036000	3.42405	5.48765	25.3662	4.74151e-07	3.23316e-05	up in var2csa-mutant singles
PF3D7_0423400	3.41449	4.36861	20.7742	5.16749e-06	0.000240723	up in var2csa-mutant singles
PF3D7_0423300	3.39174	4.10059	12.1285	0.000496578	0.00750003	up in var2csa-mutant singles
PF3D7_0707300	3.3882	8.36687	40.3608	2.1114e-10	1.90648e-07	up in var2csa-mutant singles
PF3D7_1323700	3.38555	6.02341	27.1466	1.88592e-07	1.56235e-05	up in var2csa-mutant singles
PF3D7_0424200	3.38142	5.40245	22.4878	2.11485e-06	0.000119269	up in var2csa-mutant singles
PF3D7_1335300	3.37101	7.40004	33.8456	5.96625e-09	1.75445e-06	up in var2csa-mutant singles
PF3D7_0930300	3.36984	10.4724	42.3092	7.79246e-11	1.90648e-07	up in var2csa-mutant singles
PF3D7_1343100	3.36878	4.13805	10.1515	0.00144185	0.0171745	up in var2csa-mutant singles
PF3D7_1035300	3.3687	6.58855	40.1305	2.37556e-10	1.90648e-07	up in var2csa-mutant singles
PF3D7_1036500	3.36534	6.26105	29.408	5.86347e-08	6.72869e-06	up in var2csa-mutant singles
PF3D7_1012200	3.3625	5.06148	18.9617	1.33366e-05	0.000506036	up in var2csa-mutant singles
PF3D7_1035400	3.36096	8.36576	35.7304	2.26597e-09	8.20107e-07	up in var2csa-mutant singles
PF3D7_1468400	3.3546	4.0309	17.4933	2.88323e-05	0.000910443	up in var2csa-mutant singles
PF3D7_1035600	3.33794	3.58923	18.7865	1.462e-05	0.000537398	up in var2csa-mutant singles
PF3D7_1028700	3.33701	7.28618	32.5756	1.14643e-08	2.64782e-06	up in var2csa-mutant singles
PF3D7_0628100	3.33622	5.63531	25.18	5.22213e-07	3.51002e-05	up in var2csa-mutant singles
PF3D7_0501500	3.33053	4.90381	16.2048	5.68513e-05	0.00149433	up in var2csa-mutant singles
PF3D7_1356800	3.32945	4.54322	16.2829	5.45529e-05	0.00145836	up in var2csa-mutant singles
PF3D7_0207900	3.32928	3.38053	17.8084	2.44306e-05	0.000798235	up in var2csa-mutant singles
PF3D7_1406800	3.31994	6.83771	29.1271	6.77833e-08	7.41676e-06	up in var2csa-mutant singles
PF3D7_0423500	3.31836	5.63933	17.4277	2.98445e-05	0.000923805	up in var2csa-mutant singles
PF3D7_1243900	3.31671	4.7339	20.7956	5.10998e-06	0.000240645	up in var2csa-mutant singles
PF3D7_1252100	3.3097	5.45103	17.4771	2.90791e-05	0.000912116	up in var2csa-mutant singles
PF3D7_0725400	3.30425	7.11037	29.5193	5.5362e-08	6.72869e-06	up in var2csa-mutant singles
PF3D7_0414900	3.27753	6.93333	29.7723	4.85895e-08	6.72393e-06	up in var2csa-mutant singles
PF3D7_1035500	3.27183	8.33756	40.0254	2.50676e-10	1.90648e-07	up in var2csa-mutant singles
PF3D7_1035900	3.26964	7.68004	29.5571	5.42935e-08	6.72869e-06	up in var2csa-mutant singles
PF3D7_1143100	3.26576	5.68374	26.4471	2.70848e-07	2.08908e-05	up in var2csa-mutant singles
PF3D7_0210600	3.26061	5.64295	25.3864	4.69211e-07	3.23316e-05	up in var2csa-mutant singles
PF3D7_1361400	3.25898	1.75041	9.80136	0.00174383	0.0199629	up in var2csa-mutant singles
PF3D7_1005800	3.25407	1.30294	13.3159	0.00026317	0.00481549	up in var2csa-mutant singles
PF3D7_0613900	3.25396	7.78985	39.7841	2.83641e-10	1.90648e-07	up in var2csa-mutant singles
PF3D7_1013800	3.25011	5.45998	19.024	1.29083e-05	0.000497816	up in var2csa-mutant singles
PF3D7_1145200	3.24982	6.23362	31.5367	1.95703e-08	3.68312e-06	up in var2csa-mutant singles
PF3D7_1223100	3.2446	7.0392	28.5157	9.29416e-08	9.50631e-06	up in var2csa-mutant singles
PF3D7_1223000	3.24172	2.25885	12.8482	0.000337801	0.00569661	up in var2csa-mutant singles
PF3D7_0525300	3.23824	1.33459	7.87835	0.00500302	0.0420343	up in var2csa-mutant singles
PF3D7_1371600	3.22761	4.89058	16.4234	5.06571e-05	0.00138571	up in var2csa-mutant singles
PF3D7_0817600	3.22286	6.29404	31.1305	2.41251e-08	4.05389e-06	up in var2csa-mutant singles
PF3D7_0525800	3.22259	7.68875	28.6765	8.55356e-08	8.94322e-06	up in var2csa-mutant singles
PF3D7_1229800	3.22101	4.68659	24.1397	8.95959e-07	5.47466e-05	up in var2csa-mutant singles
PF3D7_1104900	3.21991	5.17087	21.98	2.75513e-06	0.000150238	up in var2csa-mutant singles
PF3D7_0405900	3.21477	6.55731	25.8331	3.72254e-07	2.69454e-05	up in var2csa-mutant singles
PF3D7_0913800	3.20207	6.34028	25.6361	4.12254e-07	2.89501e-05	up in var2csa-mutant singles
PF3D7_1222700	3.20165	7.25078	30.6313	3.12024e-08	4.89357e-06	up in var2csa-mutant singles
PF3D7_1410400	3.20002	7.38042	33.7226	6.35565e-09	1.75902e-06	up in var2csa-mutant singles
PF3D7_1449200	3.19481	6.39977	24.8291	6.26456e-07	4.03764e-05	up in var2csa-mutant singles
PF3D7_1035700	3.19399	7.29711	32.059	1.49558e-08	2.93195e-06	up in var2csa-mutant singles
PF3D7_1451700	3.19204	3.6105	12.876	0.000332823	0.00563285	up in var2csa-mutant singles
PF3D7_0505300	3.18914	0.273018	11.5558	0.000675371	0.0095424	up in var2csa-mutant singles
PF3D7_0802100	3.18733	4.81881	17.7507	2.5183e-05	0.000817143	up in var2csa-mutant singles
PF3D7_0932200	3.18654	6.94924	26.2025	3.07421e-07	2.26003e-05	up in var2csa-mutant singles
PF3D7_1436600	3.18172	5.02417	21.893	2.88284e-06	0.000154134	up in var2csa-mutant singles
PF3D7_1444200	3.17753	0.729823	12.6584	0.000373875	0.00608678	up in var2csa-mutant singles
PF3D7_1128900	3.15513	4.64531	17.1112	3.52544e-05	0.00104982	up in var2csa-mutant singles
PF3D7_1018200	3.15003	5.17842	21.465	3.60346e-06	0.000188381	up in var2csa-mutant singles
PF3D7_0909500	3.14697	4.37139	19.1501	1.20829e-05	0.000469837	up in var2csa-mutant singles
PF3D7_1348600	3.14093	2.97364	16.9615	3.81446e-05	0.00110104	up in var2csa-mutant singles
PF3D7_0731500	3.14038	9.81999	39.4963	3.28679e-10	1.93304e-07	up in var2csa-mutant singles
PF3D7_1251200	3.13873	8.40687	34.106	5.21899e-09	1.63702e-06	up in var2csa-mutant singles
PF3D7_0214600	3.13707	6.52327	24.916	5.98836e-07	3.91323e-05	up in var2csa-mutant singles
PF3D7_0404700	3.1318	6.14614	23.6508	1.15498e-06	6.79275e-05	up in var2csa-mutant singles
PF3D7_0105300	3.12481	4.78139	16.8643	4.01501e-05	0.00115187	up in var2csa-mutant singles
PF3D7_0207000	3.1216	7.24843	28.8697	7.74147e-08	8.2781e-06	up in var2csa-mutant singles
PF3D7_1035200	3.12098	11.4661	31.4207	2.07755e-08	3.69752e-06	up in var2csa-mutant singles
PF3D7_0316100	3.11915	2.99582	14.3947	0.000148218	0.00311325	up in var2csa-mutant singles
PF3D7_1140400	3.11337	5.63727	20.2577	6.76822e-06	0.000294856	up in var2csa-mutant singles
PF3D7_1224200	3.11299	3.07525	12.7588	0.000354331	0.00589092	up in var2csa-mutant singles
PF3D7_1014900	3.1109	4.78145	16.8168	4.11682e-05	0.0011624	up in var2csa-mutant singles
PF3D7_1126700	3.10949	6.30196	29.5662	5.40403e-08	6.72869e-06	up in var2csa-mutant singles
PF3D7_0802800	3.10765	4.82226	22.2697	2.36921e-06	0.000131143	up in var2csa-mutant singles
PF3D7_1417400	3.09917	4.21054	13.8157	0.000201649	0.00390436	up in var2csa-mutant singles
PF3D7_1247700	3.09772	1.32547	12.9618	0.000317906	0.00545893	up in var2csa-mutant singles
PF3D7_0920500	3.09264	4.84443	17.5198	2.84335e-05	0.000903916	up in var2csa-mutant singles
PF3D7_1452000	3.09112	5.19602	20.7485	5.23721e-06	0.000241579	up in var2csa-mutant singles
PF3D7_1028800	3.08921	3.30292	15.2367	9.48432e-05	0.00225372	up in var2csa-mutant singles
PF3D7_1435200	3.08848	3.43113	17.9472	2.27122e-05	0.000752542	up in var2csa-mutant singles
PF3D7_0932000	3.08804	5.47627	22.4747	2.12935e-06	0.000119269	up in var2csa-mutant singles
PF3D7_0515400	3.07742	4.15502	19.6291	9.40284e-06	0.000388494	up in var2csa-mutant singles
PF3D7_1301600	3.06647	7.59376	32.7566	1.04449e-08	2.58648e-06	up in var2csa-mutant singles
PF3D7_0318800	3.0603	1.44122	12.2733	0.000459492	0.00706507	up in var2csa-mutant singles
PF3D7_0905400	3.06004	8.93263	32.4262	1.23809e-08	2.64782e-06	up in var2csa-mutant singles
PF3D7_1310700	3.05881	8.00873	30.3238	3.65615e-08	5.37568e-06	up in var2csa-mutant singles
PF3D7_0423800	3.05815	4.72204	14.6594	0.000128793	0.00284493	up in var2csa-mutant singles
PF3D7_0929400	3.03554	7.41896	24.2267	8.56366e-07	5.30158e-05	up in var2csa-mutant singles
PF3D7_0614700	3.03261	2.78754	13.2121	0.000278153	0.00497608	up in var2csa-mutant singles
PF3D7_1228600	3.02959	9.37316	30.3814	3.54918e-08	5.37568e-06	up in var2csa-mutant singles
PF3D7_1335100	3.02708	7.33961	27.469	1.59635e-07	1.44439e-05	up in var2csa-mutant singles
PF3D7_1246200	3.01929	9.99727	38.8509	4.57451e-10	2.39145e-07	up in var2csa-mutant singles
PF3D7_0203000	3.01468	4.98166	18.9456	1.34501e-05	0.000506261	up in var2csa-mutant singles
PF3D7_0919200	3.01215	3.29215	14.6065	0.00013246	0.00289871	up in var2csa-mutant singles
PF3D7_1461400	3.01143	4.54753	16.3503	5.26479e-05	0.00142361	up in var2csa-mutant singles
PF3D7_1403700	3.0018	0.35147	11.0624	0.000880971	0.011809	up in var2csa-mutant singles
PF3D7_1216500	3.00164	2.86968	18.5281	1.67414e-05	0.000596729	up in var2csa-mutant singles
PF3D7_1475800	3.00115	2.14786	14.1185	0.00017165	0.00345133	up in var2csa-mutant singles
PF3D7_1118700	2.99901	5.32864	18.7082	1.52325e-05	0.000555572	up in var2csa-mutant singles
PF3D7_1037500	2.99628	3.04757	14.5852	0.000133962	0.00291801	up in var2csa-mutant singles
PF3D7_0704800	2.99624	2.51544	14.3262	0.00015371	0.00320003	up in var2csa-mutant singles
PF3D7_0822900	2.99403	7.55204	31.3797	2.12185e-08	3.69752e-06	up in var2csa-mutant singles
PF3D7_0831600	2.99246	4.77665	13.0528	0.000302832	0.00529675	up in var2csa-mutant singles
PF3D7_0402300	2.98637	5.12958	17.1779	3.40373e-05	0.0010399	up in var2csa-mutant singles
PF3D7_0503400	2.98625	7.67185	30.0473	4.21632e-08	6.01144e-06	up in var2csa-mutant singles
PF3D7_1460600	2.98466	1.91275	11.4178	0.000727422	0.0101258	up in var2csa-mutant singles
PF3D7_0805200	2.98391	6.5587	29.4513	5.73389e-08	6.72869e-06	up in var2csa-mutant singles
PF3D7_0211600	2.98148	0.83017	10.9534	0.000934323	0.0124886	up in var2csa-mutant singles
PF3D7_0803200	2.97737	5.11823	17.8135	2.43651e-05	0.000798235	up in var2csa-mutant singles
PF3D7_1133400	2.97483	7.71054	29.188	6.56843e-08	7.35821e-06	up in var2csa-mutant singles
PF3D7_1028900	2.9743	2.82632	16.0009	6.33114e-05	0.00164575	up in var2csa-mutant singles
PF3D7_0207200	2.97172	0.870097	9.01624	0.00267592	0.0271926	up in var2csa-mutant singles
PF3D7_1235200	2.96855	4.4406	18.3375	1.85032e-05	0.000649682	up in var2csa-mutant singles
PF3D7_0806300	2.96847	4.26363	16.4074	5.10858e-05	0.00138936	up in var2csa-mutant singles
PF3D7_0930200	2.96431	4.02837	10.854	0.000985813	0.0129654	up in var2csa-mutant singles
PF3D7_1469900	2.96425	1.5125	10.2208	0.00138866	0.016796	up in var2csa-mutant singles
PF3D7_0318500	2.9639	4.49561	15.411	8.64832e-05	0.00207604	up in var2csa-mutant singles
PF3D7_1147400	2.96286	3.04573	14.614	0.00013193	0.00289871	up in var2csa-mutant singles
PF3D7_1439500	2.95941	3.83303	12.5156	0.000403564	0.0064126	up in var2csa-mutant singles
PF3D7_0613800	2.95904	5.36874	21.4071	3.71395e-06	0.000191388	up in var2csa-mutant singles
PF3D7_0919900	2.9564	6.66434	25.6385	4.11751e-07	2.89501e-05	up in var2csa-mutant singles
PF3D7_1003600	2.95603	7.84392	29.4293	5.79937e-08	6.72869e-06	up in var2csa-mutant singles
PF3D7_0808200	2.95222	6.76095	28.1855	1.10225e-07	1.10342e-05	up in var2csa-mutant singles
PF3D7_1125700	2.95217	6.29582	27.8109	1.33767e-07	1.23407e-05	up in var2csa-mutant singles
PF3D7_0917300	2.94442	2.05305	12.9243	0.000324345	0.00552914	up in var2csa-mutant singles
PF3D7_1215600	2.93568	1.1456	8.26382	0.0040443	0.0361757	up in var2csa-mutant singles
PF3D7_1345600	2.9347	4.83008	16.8302	4.08783e-05	0.0011624	up in var2csa-mutant singles
PF3D7_1021800	2.93427	7.72822	26.7756	2.28507e-07	1.81007e-05	up in var2csa-mutant singles
PF3D7_0507400	2.93422	2.86021	14.5055	0.000139747	0.00300233	up in var2csa-mutant singles
PF3D7_0629300	2.93278	4.36524	17.9788	2.23379e-05	0.000745388	up in var2csa-mutant singles
PF3D7_1022900	2.93214	2.78636	14.7403	0.000123382	0.00273826	up in var2csa-mutant singles
PF3D7_0306000	2.93098	2.32867	14.1559	0.00016827	0.00342733	up in var2csa-mutant singles
PF3D7_1246400	2.9278	7.00407	26.7561	2.30827e-07	1.81007e-05	up in var2csa-mutant singles
PF3D7_1472700	2.92562	2.27314	11.7073	0.000622558	0.00898508	up in var2csa-mutant singles
PF3D7_1430900	2.91661	3.27	14.7428	0.000123215	0.00273826	up in var2csa-mutant singles
PF3D7_0810300	2.90999	7.27581	26.8209	2.23209e-07	1.81007e-05	up in var2csa-mutant singles
PF3D7_0919300	2.90442	4.59758	16.2608	5.51955e-05	0.0014672	up in var2csa-mutant singles
PF3D7_0911100	2.90082	6.29406	27.3417	1.70493e-07	1.4855e-05	up in var2csa-mutant singles
PF3D7_1243400	2.8973	2.59191	11.3634	0.000749054	0.0103656	up in var2csa-mutant singles
PF3D7_0905500	2.89209	1.51776	8.99316	0.00270992	0.0273609	up in var2csa-mutant singles
PF3D7_1410800	2.89176	3.64205	13.1748	0.000283744	0.0050378	up in var2csa-mutant singles
PF3D7_0220800	2.88983	5.50775	16.9987	3.74049e-05	0.00108636	up in var2csa-mutant singles
PF3D7_0522400	2.8876	4.49305	15.7081	7.39067e-05	0.00182195	up in var2csa-mutant singles
PF3D7_1361800	2.8865	7.61535	36.1335	1.84254e-09	7.88106e-07	up in var2csa-mutant singles
PF3D7_1435600	2.88571	4.28447	14.3023	0.000155672	0.00321243	up in var2csa-mutant singles
PF3D7_1469200	2.88026	3.78903	14.4348	0.000145098	0.00307516	up in var2csa-mutant singles
PF3D7_0730400	2.87823	4.98023	18.819	1.43724e-05	0.000536685	up in var2csa-mutant singles
PF3D7_1463900	2.87764	5.19118	17.0766	3.59019e-05	0.00106238	up in var2csa-mutant singles
PF3D7_0206800	2.87729	9.93025	30.7279	2.96872e-08	4.81649e-06	up in var2csa-mutant singles
PF3D7_1001600	2.87587	5.57028	14.405	0.000147407	0.00311009	up in var2csa-mutant singles
PF3D7_0902100	2.87485	2.89369	12.6101	0.000383678	0.00622419	up in var2csa-mutant singles
PF3D7_1230100	2.87413	1.30245	13.3021	0.000265114	0.00481549	up in var2csa-mutant singles
PF3D7_1342600	2.87037	8.83447	29.451	5.73499e-08	6.72869e-06	up in var2csa-mutant singles
PF3D7_1449100	2.86368	3.77192	15.1741	9.80391e-05	0.00231796	up in var2csa-mutant singles
PF3D7_0308100	2.86128	3.62924	13.3041	0.000264827	0.00481549	up in var2csa-mutant singles
PF3D7_1029900	2.85853	6.18629	14.307	0.000155286	0.00321243	up in var2csa-mutant singles
PF3D7_1007200	2.85782	4.95768	19.4366	1.03995e-05	0.000414659	up in var2csa-mutant singles
PF3D7_0207700	2.853	5.3158	18.054	2.14731e-05	0.000732109	up in var2csa-mutant singles
PF3D7_0515700	2.85077	7.5186	26.3002	2.92257e-07	2.21785e-05	up in var2csa-mutant singles
PF3D7_0304000	2.84632	1.00081	11.7147	0.000620088	0.00897697	up in var2csa-mutant singles
PF3D7_1125800	2.84458	7.29191	27.9047	1.27439e-07	1.1992e-05	up in var2csa-mutant singles
PF3D7_0202800	2.84258	0.973467	9.05543	0.00261916	0.0267895	up in var2csa-mutant singles
PF3D7_0404000	2.83682	2.03397	9.66738	0.00187569	0.0210624	up in var2csa-mutant singles
PF3D7_1230300	2.83677	0.606044	11.2073	0.000814777	0.0110476	up in var2csa-mutant singles
PF3D7_0207100	2.83511	6.33292	21.3763	3.77398e-06	0.000191388	up in var2csa-mutant singles
PF3D7_0212600	2.82587	5.89535	19.5521	9.78909e-06	0.000395621	up in var2csa-mutant singles
PF3D7_1337700	2.8246	2.95227	13.7136	0.000212907	0.00408122	up in var2csa-mutant singles
PF3D7_0109000	2.82398	6.27766	21.2476	4.03624e-06	0.000200095	up in var2csa-mutant singles
PF3D7_1430200	2.82259	5.1239	20.7939	5.11466e-06	0.000240645	up in var2csa-mutant singles
PF3D7_1455300	2.82086	5.80138	21.1665	4.21071e-06	0.000204241	up in var2csa-mutant singles
PF3D7_0929600	2.81941	2.8367	15.9239	6.59404e-05	0.00166801	up in var2csa-mutant singles
PF3D7_1036400	2.81891	2.69636	10.1088	0.00147561	0.0173452	up in var2csa-mutant singles
PF3D7_1030200	2.81111	6.00721	23.84	1.04683e-06	6.3145e-05	up in var2csa-mutant singles
PF3D7_0424100	2.80797	3.78039	14.4571	0.000143388	0.00305467	up in var2csa-mutant singles
PF3D7_1431000	2.8074	1.98326	13.5114	0.000237115	0.00444472	up in var2csa-mutant singles
PF3D7_0724900	2.80445	2.52502	14.8804	0.000114545	0.00259104	up in var2csa-mutant singles
PF3D7_0508100	2.80325	5.67739	20.9171	4.79583e-06	0.000230249	up in var2csa-mutant singles
PF3D7_0803400	2.80044	5.47921	18.9646	1.33167e-05	0.000506036	up in var2csa-mutant singles
PF3D7_0717600	2.79887	3.86954	10.5189	0.00118162	0.014786	up in var2csa-mutant singles
PF3D7_0314900	2.7985	1.55221	9.45738	0.00210301	0.0229043	up in var2csa-mutant singles
PF3D7_1409400	2.79748	4.73455	17.3536	3.10304e-05	0.000954235	up in var2csa-mutant singles
PF3D7_0811000	2.79669	3.41569	13.9827	0.000184497	0.00366269	up in var2csa-mutant singles
PF3D7_1308000	2.7965	4.84545	15.4386	8.52297e-05	0.00205644	up in var2csa-mutant singles
PF3D7_1413700	2.79359	5.69715	21.8033	3.0208e-06	0.000159695	up in var2csa-mutant singles
PF3D7_1231300	2.79348	0.830317	12.0311	0.00052321	0.00783982	up in var2csa-mutant singles
PF3D7_0723200	2.79159	0.299389	9.47233	0.00208594	0.0228911	up in var2csa-mutant singles
PF3D7_0818100	2.79155	5.28567	18.2213	1.96662e-05	0.000680365	up in var2csa-mutant singles
PF3D7_1473400	2.79085	3.23147	12.7658	0.000353005	0.00588968	up in var2csa-mutant singles
PF3D7_0605300	2.78867	2.82363	14.8809	0.000114516	0.00259104	up in var2csa-mutant singles
PF3D7_1232500	2.78865	5.44641	21.3718	3.78301e-06	0.000191388	up in var2csa-mutant singles
PF3D7_1025400	2.78658	4.89294	17.5492	2.79972e-05	0.000896101	up in var2csa-mutant singles
PF3D7_1110600	2.78457	3.96195	14.0046	0.000182367	0.00363575	up in var2csa-mutant singles
PF3D7_0308300	2.78445	3.48211	14.1442	0.000169317	0.00343378	up in var2csa-mutant singles
PF3D7_0821000	2.78356	3.73382	10.1854	0.0014156	0.0169908	up in var2csa-mutant singles
PF3D7_0401900	2.78333	3.08837	15.8656	6.80028e-05	0.00171098	up in var2csa-mutant singles
PF3D7_0828800	2.78105	5.09896	17.4463	2.95542e-05	0.000920876	up in var2csa-mutant singles
PF3D7_1312800	2.78058	4.40398	17.0173	3.70415e-05	0.00108249	up in var2csa-mutant singles
PF3D7_0817800	2.77566	3.09849	12.5099	0.000404791	0.0064126	up in var2csa-mutant singles
PF3D7_1204900	2.77278	3.33381	12.6038	0.00038496	0.00622419	up in var2csa-mutant singles
PF3D7_1231200	2.77206	3.37501	10.1543	0.00143963	0.0171745	up in var2csa-mutant singles
PF3D7_1325400	2.76752	4.14959	12.1482	0.000491366	0.0074818	up in var2csa-mutant singles
PF3D7_1304000	2.76495	3.55234	13.0434	0.00030436	0.00530375	up in var2csa-mutant singles
PF3D7_0308700	2.75978	3.05104	16.1148	5.96153e-05	0.00155828	up in var2csa-mutant singles
PF3D7_1425300	2.75934	4.43985	14.5593	0.000135814	0.00294472	up in var2csa-mutant singles
PF3D7_0620400	2.75927	2.78983	12.684	0.000368802	0.00604603	up in var2csa-mutant singles
PF3D7_0917400	2.75527	2.52906	8.66712	0.00324003	0.0307345	up in var2csa-mutant singles
PF3D7_0802600	2.75481	6.18511	27.4232	1.63463e-07	1.45112e-05	up in var2csa-mutant singles
PF3D7_1435300	2.75469	5.01772	19.3909	1.06514e-05	0.000421132	up in var2csa-mutant singles
PF3D7_1439400	2.75191	5.12102	18.6906	1.53742e-05	0.000556427	up in var2csa-mutant singles
PF3D7_0908500	2.74887	3.66434	15.604	7.80895e-05	0.0019136	up in var2csa-mutant singles
PF3D7_1403600	2.74508	3.21053	11.6996	0.00062515	0.00899489	up in var2csa-mutant singles
PF3D7_1034700	2.73616	2.50516	10.6892	0.00107765	0.0138173	up in var2csa-mutant singles
PF3D7_1356300	2.73362	5.31145	18.3144	1.87285e-05	0.000652724	up in var2csa-mutant singles
PF3D7_1019600	2.72941	2.72708	13.002	0.000311164	0.00536273	up in var2csa-mutant singles
PF3D7_0204100	2.72453	5.07587	17.1155	3.51743e-05	0.00104982	up in var2csa-mutant singles
PF3D7_0908400	2.72385	1.51512	7.76476	0.00532754	0.0437453	up in var2csa-mutant singles
PF3D7_0203400	2.72379	3.5586	13.694	0.000215137	0.00409806	up in var2csa-mutant singles
PF3D7_0107000	2.71814	4.5449	13.0846	0.000297731	0.00522696	up in var2csa-mutant singles
PF3D7_0402200	2.715	6.07454	21.2457	4.04017e-06	0.000200095	up in var2csa-mutant singles
PF3D7_0531300	2.71495	1.20699	8.33066	0.00389815	0.0352708	up in var2csa-mutant singles
PF3D7_1318600	2.71043	0.725196	9.58083	0.0019662	0.0219217	up in var2csa-mutant singles
PF3D7_0724800	2.69877	4.60001	16.5925	4.63328e-05	0.00128992	up in var2csa-mutant singles
PF3D7_1025800	2.69716	1.70862	10.7029	0.00106966	0.0137884	up in var2csa-mutant singles
PF3D7_1215400	2.69569	3.17031	10.6618	0.00109372	0.0139365	up in var2csa-mutant singles
PF3D7_1313500	2.69112	0.751059	10.2633	0.00135701	0.0165837	up in var2csa-mutant singles
PF3D7_0407800	2.691	5.62847	20.4877	6.00155e-06	0.000266389	up in var2csa-mutant singles
PF3D7_1431100	2.69059	1.30023	10.5831	0.00114123	0.0144621	up in var2csa-mutant singles
PF3D7_0216000	2.69028	2.6236	10.23	0.00138174	0.0167879	up in var2csa-mutant singles
PF3D7_0530900	2.6886	2.64249	12.1276	0.000496822	0.00750003	up in var2csa-mutant singles
PF3D7_1455600	2.68176	2.22251	12.2085	0.000475733	0.00726728	up in var2csa-mutant singles
PF3D7_0911000	2.68138	2.87232	9.18598	0.00243875	0.0256133	up in var2csa-mutant singles
PF3D7_1341800	2.67898	2.73002	13.6095	0.000225048	0.00425242	up in var2csa-mutant singles
PF3D7_1112600	2.67822	1.51273	11.1466	0.000841836	0.0113817	up in var2csa-mutant singles
PF3D7_0817700	2.67803	5.79372	21.1919	4.15513e-06	0.000203645	up in var2csa-mutant singles
PF3D7_0424300	2.67714	6.16646	20.5326	5.86244e-06	0.000263685	up in var2csa-mutant singles
PF3D7_0308800	2.67519	3.35056	12.5271	0.000401083	0.00639693	up in var2csa-mutant singles
PF3D7_1035100	2.67376	4.16477	12.4314	0.000422166	0.00664311	up in var2csa-mutant singles
PF3D7_1014100	2.67255	4.05664	13.8219	0.000200978	0.00390436	up in var2csa-mutant singles
PF3D7_0507500	2.67244	6.24088	24.5163	7.36849e-07	4.68497e-05	up in var2csa-mutant singles
PF3D7_0218100	2.66315	1.12359	8.45884	0.00363273	0.0334481	up in var2csa-mutant singles
PF3D7_1446600	2.66277	5.32079	17.022	3.69485e-05	0.00108249	up in var2csa-mutant singles
PF3D7_0503600	2.66247	5.66012	19.627	9.41303e-06	0.000388494	up in var2csa-mutant singles
PF3D7_1136200	2.66232	4.74294	15.5121	8.19774e-05	0.00199846	up in var2csa-mutant singles
PF3D7_1133200	2.66223	6.8058	17.13	3.49074e-05	0.00104982	up in var2csa-mutant singles
PF3D7_0604100	2.65746	4.44416	11.9167	0.000556331	0.00819549	up in var2csa-mutant singles
PF3D7_1236900	2.65682	3.94996	14.3712	0.000150084	0.00313843	up in var2csa-mutant singles
PF3D7_1322600	2.6566	1.30665	10.1055	0.0014783	0.0173452	up in var2csa-mutant singles
PF3D7_0605700	2.65102	1.32284	12.5452	0.000397225	0.00635695	up in var2csa-mutant singles
PF3D7_1312600	2.6468	3.82636	12.6699	0.000371584	0.00607049	up in var2csa-mutant singles
PF3D7_1112900	2.64003	0.717258	8.46029	0.00362984	0.0334481	up in var2csa-mutant singles
PF3D7_1361700	2.63884	3.41942	12.9503	0.000319876	0.00547278	up in var2csa-mutant singles
PF3D7_0828600	2.63755	2.91305	13.2042	0.000279322	0.00497806	up in var2csa-mutant singles
PF3D7_0705400	2.63606	5.44858	15.8316	6.92371e-05	0.00173277	up in var2csa-mutant singles
PF3D7_0603800	2.6338	4.29774	14.1306	0.00017055	0.00344395	up in var2csa-mutant singles
PF3D7_1238600	2.62973	3.65913	10.6883	0.00107814	0.0138173	up in var2csa-mutant singles
PF3D7_0618000	2.62871	4.2703	13.9121	0.000191566	0.00377213	up in var2csa-mutant singles
PF3D7_1136900	2.62312	5.92084	20.2383	6.83713e-06	0.000295126	up in var2csa-mutant singles
PF3D7_0613400	2.62175	4.41139	13.1054	0.000294448	0.00520818	up in var2csa-mutant singles
PF3D7_1008200	2.62118	-0.485818	8.32217	0.00391641	0.0353002	up in var2csa-mutant singles
PF3D7_0829800	2.61921	6.45511	18.795	1.45549e-05	0.000537398	up in var2csa-mutant singles
PF3D7_1141300	2.61779	3.06913	10.4314	0.00123889	0.0153799	up in var2csa-mutant singles
PF3D7_1243700	2.61688	6.11032	19.7585	8.78691e-06	0.000369129	up in var2csa-mutant singles
PF3D7_0319400	2.61677	4.12746	11.7546	0.000606923	0.00884078	up in var2csa-mutant singles
PF3D7_0207600	2.60778	8.45352	27.9679	1.23348e-07	1.1992e-05	up in var2csa-mutant singles
PF3D7_0413500	2.60459	3.94285	7.69445	0.00553909	0.0447791	up in var2csa-mutant singles
PF3D7_1351700	2.60273	6.82234	27.1397	1.89276e-07	1.56235e-05	up in var2csa-mutant singles
PF3D7_1009700	2.60119	4.81901	14.8696	0.000115204	0.00259347	up in var2csa-mutant singles
PF3D7_0906100	2.60048	3.2556	11.299	0.000775471	0.0106373	up in var2csa-mutant singles
PF3D7_1430700	2.59953	2.83233	11.9596	0.00054366	0.00804378	up in var2csa-mutant singles
PF3D7_1026600	2.59894	9.25906	32.5045	1.18918e-08	2.64782e-06	up in var2csa-mutant singles
PF3D7_0920600	2.59822	3.0501	9.9879	0.00157573	0.0183057	up in var2csa-mutant singles
PF3D7_1341500	2.59776	2.63214	11.9131	0.000557398	0.00819549	up in var2csa-mutant singles
PF3D7_0415800	2.59595	2.03612	12.0237	0.000525296	0.00784609	up in var2csa-mutant singles
PF3D7_1430800	2.59364	-0.303456	8.75753	0.00308327	0.0298768	up in var2csa-mutant singles
PF3D7_1025700	2.59343	1.90878	10.9374	0.000942431	0.0125258	up in var2csa-mutant singles
PF3D7_0210700	2.59272	1.83628	7.44058	0.00637693	0.0493478	up in var2csa-mutant singles
PF3D7_0216800	2.58497	3.69724	13.033	0.000306044	0.00531342	up in var2csa-mutant singles
PF3D7_0318700	2.58363	3.66987	8.66785	0.00323874	0.0307345	up in var2csa-mutant singles
PF3D7_1129300	2.57985	3.26864	14.0506	0.000177952	0.00356283	up in var2csa-mutant singles
PF3D7_0813100	2.57971	3.22782	10.5746	0.00114652	0.0144621	up in var2csa-mutant singles
PF3D7_1137200	2.57952	2.91092	7.94939	0.00481036	0.0411504	up in var2csa-mutant singles
PF3D7_1007300	2.57798	2.64525	12.0053	0.000530504	0.00787388	up in var2csa-mutant singles
PF3D7_0522500	2.57746	2.47551	11.3188	0.000767271	0.0105556	up in var2csa-mutant singles
PF3D7_0316000	2.57563	3.0046	11.6495	0.000642203	0.00912859	up in var2csa-mutant singles
PF3D7_1423300	2.56385	5.59066	18.0386	2.16476e-05	0.00073275	up in var2csa-mutant singles
PF3D7_1146600	2.56255	5.52131	16.5197	4.81475e-05	0.00133255	up in var2csa-mutant singles
PF3D7_0612200	2.56075	4.53476	15.4784	8.34517e-05	0.00202392	up in var2csa-mutant singles
PF3D7_0525700	2.56047	4.20974	13.6846	0.000216223	0.00410213	up in var2csa-mutant singles
PF3D7_0522600	2.5579	1.78354	9.32859	0.00225605	0.0241244	up in var2csa-mutant singles
PF3D7_1113000	2.55689	1.90556	12.3025	0.000452353	0.00700105	up in var2csa-mutant singles
PF3D7_1342500	2.55385	1.77487	9.28546	0.0023098	0.0245319	up in var2csa-mutant singles
PF3D7_1017200	2.54939	1.3624	9.75721	0.00178621	0.020349	up in var2csa-mutant singles
PF3D7_1209600	2.54935	1.23637	8.8495	0.00293169	0.0290436	up in var2csa-mutant singles
PF3D7_0610400	2.54564	9.65272	11.6745	0.000633624	0.00906423	up in var2csa-mutant singles
PF3D7_1349100	2.54429	2.34281	8.46551	0.00361944	0.0334481	up in var2csa-mutant singles
PF3D7_0920700	2.54389	4.29916	12.3277	0.000446286	0.00692996	up in var2csa-mutant singles
PF3D7_1235100	2.53988	0.595127	7.75603	0.00535336	0.0438808	up in var2csa-mutant singles
PF3D7_0403900	2.53579	2.59123	10.7433	0.00104659	0.013528	up in var2csa-mutant singles
PF3D7_0702100	2.53347	6.79625	24.2955	8.26338e-07	5.18389e-05	up in var2csa-mutant singles
PF3D7_0408500	2.53319	4.0642	11.6689	0.000635536	0.00906423	up in var2csa-mutant singles
PF3D7_1462700	2.52722	4.34224	13.502	0.000238305	0.0044493	up in var2csa-mutant singles
PF3D7_0419400	2.52538	3.53437	10.8288	0.000999316	0.0130605	up in var2csa-mutant singles
PF3D7_1008700	2.51615	6.33192	18.622	1.59367e-05	0.000572384	up in var2csa-mutant singles
PF3D7_0528300	2.51365	2.7125	12.7845	0.000349505	0.00585204	up in var2csa-mutant singles
PF3D7_1351600	2.51142	4.68786	13.8576	0.000197197	0.00386589	up in var2csa-mutant singles
PF3D7_0506900	2.50994	5.99192	17.6723	2.62414e-05	0.000845657	up in var2csa-mutant singles
PF3D7_1307500	2.50956	3.28591	8.65903	0.00325445	0.0307474	up in var2csa-mutant singles
PF3D7_1012300	2.50954	3.32993	11.4005	0.000734246	0.0101906	up in var2csa-mutant singles
PF3D7_0816400	2.50637	2.43078	10.0036	0.00156233	0.018195	up in var2csa-mutant singles
PF3D7_0530300	2.50472	2.90564	11.2316	0.000804179	0.0109415	up in var2csa-mutant singles
PF3D7_1324600	2.5037	2.46071	9.35023	0.00222957	0.0238955	up in var2csa-mutant singles
PF3D7_0709900	2.50318	2.93396	10.1265	0.00146155	0.0173214	up in var2csa-mutant singles
PF3D7_1028200	2.49604	2.46394	7.94226	0.00482934	0.0412379	up in var2csa-mutant singles
PF3D7_1421900	2.49526	3.83455	8.75962	0.00307973	0.0298768	up in var2csa-mutant singles
PF3D7_0933700	2.49265	1.48398	7.44906	0.00634695	0.0491967	up in var2csa-mutant singles
PF3D7_1116900	2.48856	1.84654	11.5343	0.000683224	0.00962445	up in var2csa-mutant singles
PF3D7_1338600	2.48599	5.54031	15.1095	0.000101449	0.00238658	up in var2csa-mutant singles
PF3D7_1247800	2.48076	2.98357	13.5291	0.000234892	0.00442067	up in var2csa-mutant singles
PF3D7_1228300	2.47746	4.79101	15.0989	0.000102023	0.00238814	up in var2csa-mutant singles
PF3D7_1251300	2.47205	3.63039	11.2305	0.000804625	0.0109415	up in var2csa-mutant singles
PF3D7_1234900	2.46664	5.39979	16.2292	5.61236e-05	0.00148349	up in var2csa-mutant singles
PF3D7_0806200	2.46551	1.70803	10.6839	0.00108072	0.0138173	up in var2csa-mutant singles
PF3D7_1426900	2.46171	4.13758	12.3897	0.000431717	0.00674826	up in var2csa-mutant singles
PF3D7_1135500	2.46059	0.426764	7.9003	0.00494267	0.0417515	up in var2csa-mutant singles
PF3D7_1423100	2.46057	3.56119	12.5697	0.000392051	0.00629556	up in var2csa-mutant singles
PF3D7_0527000	2.45483	6.51849	19.5426	9.83797e-06	0.000395621	up in var2csa-mutant singles
PF3D7_0311300	2.45347	4.98299	12.8824	0.00033169	0.00563285	up in var2csa-mutant singles
PF3D7_0924300	2.45284	2.80268	8.77354	0.00305632	0.0298582	up in var2csa-mutant singles
PF3D7_0829900	2.45148	7.80816	20.6591	5.4875e-06	0.000250667	up in var2csa-mutant singles
PF3D7_0628300	2.44979	8.31811	32.154	1.42422e-08	2.91347e-06	up in var2csa-mutant singles
PF3D7_0418600	2.44933	4.43066	14.9351	0.000111272	0.00255383	up in var2csa-mutant singles
PF3D7_0211500	2.44927	1.5705	11.4428	0.0007177	0.0100201	up in var2csa-mutant singles
PF3D7_0621100	2.44746	4.88931	13.0213	0.000307969	0.00532719	up in var2csa-mutant singles
PF3D7_0730500	2.44182	4.48317	9.43293	0.00213124	0.0231581	up in var2csa-mutant singles
PF3D7_0917500	2.44084	3.22273	8.02886	0.00460378	0.0398176	up in var2csa-mutant singles
PF3D7_0306500	2.43536	3.33933	10.8789	0.000972664	0.0128912	up in var2csa-mutant singles
PF3D7_0304100	2.42465	3.82749	12.5708	0.000391826	0.00629556	up in var2csa-mutant singles
PF3D7_1116100	2.42437	5.6171	13.0976	0.000295668	0.00521018	up in var2csa-mutant singles
PF3D7_1417300	2.42388	2.84697	8.27423	0.00402117	0.0361062	up in var2csa-mutant singles
PF3D7_0918000	2.41547	6.99948	21.9641	2.77805e-06	0.000150238	up in var2csa-mutant singles
PF3D7_1108500	2.41386	4.91943	13.3748	0.000255029	0.00472406	up in var2csa-mutant singles
PF3D7_1206300	2.41074	5.80166	14.9606	0.000109782	0.00253198	up in var2csa-mutant singles
PF3D7_0106000	2.40869	3.68007	8.82454	0.00297206	0.0292543	up in var2csa-mutant singles
PF3D7_1443000	2.40785	1.47791	9.24054	0.00236715	0.025028	up in var2csa-mutant singles
PF3D7_1422600	2.40501	2.27545	9.57112	0.00197662	0.0219858	up in var2csa-mutant singles
PF3D7_0918700	2.39528	6.70769	23.3798	1.32965e-06	7.67775e-05	up in var2csa-mutant singles
PF3D7_1471500	2.39407	2.30889	10.8019	0.00101396	0.0131786	up in var2csa-mutant singles
PF3D7_1023800	2.39271	2.34605	9.81217	0.00173361	0.0198942	up in var2csa-mutant singles
PF3D7_1021200	2.39259	3.76428	9.06276	0.00260868	0.0267404	up in var2csa-mutant singles
PF3D7_1405600	2.39125	4.70091	9.72026	0.00182248	0.0205629	up in var2csa-mutant singles
PF3D7_0320700	2.3902	4.48701	8.48052	0.00358969	0.033247	up in var2csa-mutant singles
PF3D7_0206200	2.38625	5.01347	12.7209	0.000361589	0.00598765	up in var2csa-mutant singles
PF3D7_1016000	2.37911	2.30711	8.2427	0.00409163	0.0365297	up in var2csa-mutant singles
PF3D7_1211700	2.3785	5.81322	16.7324	4.30389e-05	0.00120535	up in var2csa-mutant singles
PF3D7_1028600	2.36368	3.86103	10.2487	0.00136782	0.0166725	up in var2csa-mutant singles
PF3D7_1347000	2.36268	0.879192	9.41242	0.00215521	0.0233647	up in var2csa-mutant singles
PF3D7_1356100	2.36003	3.40126	10.4821	0.00120537	0.0150431	up in var2csa-mutant singles
PF3D7_1235600	2.35959	5.06968	13.33	0.000261191	0.0048004	up in var2csa-mutant singles
PF3D7_1107100	2.35755	4.06673	11.1215	0.000853323	0.0114711	up in var2csa-mutant singles
PF3D7_0323400	2.35508	5.84305	14.4559	0.000143482	0.00305467	up in var2csa-mutant singles
PF3D7_0925600	2.34572	2.11582	10.0464	0.00152646	0.0178213	up in var2csa-mutant singles
PF3D7_1108100	2.34525	3.76936	12.2374	0.000468407	0.00717869	up in var2csa-mutant singles
PF3D7_0407700	2.34513	5.49722	10.8412	0.000992676	0.0130099	up in var2csa-mutant singles
PF3D7_1336600	2.34119	3.02993	9.30009	0.00229142	0.024447	up in var2csa-mutant singles
PF3D7_0622600	2.34043	2.24473	7.87937	0.00500019	0.0420343	up in var2csa-mutant singles
PF3D7_1413500	2.33425	2.24594	7.8557	0.00506607	0.0423183	up in var2csa-mutant singles
PF3D7_1138000	2.33321	1.92213	7.90027	0.00494274	0.0417515	up in var2csa-mutant singles
PF3D7_1003100	2.33314	2.1374	10.129	0.00145957	0.0173214	up in var2csa-mutant singles
PF3D7_0605500	2.32735	1.09171	8.73228	0.00312625	0.0300183	up in var2csa-mutant singles
PF3D7_0610000	2.32622	2.0356	9.00004	0.00269973	0.0273166	up in var2csa-mutant singles
PF3D7_0728600	2.32402	5.77321	11.3383	0.000759242	0.0104758	up in var2csa-mutant singles
PF3D7_1443700	2.32185	1.95289	7.7194	0.00546307	0.0443168	up in var2csa-mutant singles
PF3D7_1242300	2.31972	1.43405	7.55649	0.00597942	0.0469385	up in var2csa-mutant singles
PF3D7_0611100	2.31933	0.793254	7.47649	0.00625099	0.0486936	up in var2csa-mutant singles
PF3D7_1331600	2.31686	3.35369	7.83479	0.005125	0.0423183	up in var2csa-mutant singles
PF3D7_0715500	2.31567	1.85818	9.49953	0.00205524	0.0227527	up in var2csa-mutant singles
PF3D7_0508900	2.31239	6.8842	20.2796	6.69117e-06	0.000294224	up in var2csa-mutant singles
PF3D7_0313600	2.31144	2.84505	8.08717	0.00445797	0.0390591	up in var2csa-mutant singles
PF3D7_0914400	2.31073	3.8256	9.49996	0.00205477	0.0227527	up in var2csa-mutant singles
PF3D7_1474000	2.3061	2.54678	7.8451	0.00509586	0.0423183	up in var2csa-mutant singles
PF3D7_0105800	2.30601	4.48346	9.11711	0.0025323	0.0261856	up in var2csa-mutant singles
PF3D7_0703600	2.29912	4.52405	10.5747	0.00114643	0.0144621	up in var2csa-mutant singles
PF3D7_1110700	2.29392	4.20691	10.2713	0.00135114	0.016555	up in var2csa-mutant singles
PF3D7_0908200	2.29079	2.58169	10.4582	0.00122105	0.0151985	up in var2csa-mutant singles
PF3D7_1465000	2.2901	2.91443	10.1066	0.00147741	0.0173452	up in var2csa-mutant singles
PF3D7_1321100	2.28593	4.54805	12.4344	0.000421505	0.00664311	up in var2csa-mutant singles
PF3D7_0217100	2.28552	4.04097	11.5868	0.000664219	0.0094131	up in var2csa-mutant singles
PF3D7_1403100	2.28337	4.80952	10.9478	0.000937146	0.0124909	up in var2csa-mutant singles
PF3D7_1449000	2.28107	0.827786	8.48344	0.00358394	0.033247	up in var2csa-mutant singles
PF3D7_0915700	2.27985	1.82744	8.0226	0.00461972	0.0398821	up in var2csa-mutant singles
PF3D7_0212900	2.27866	4.79609	9.47566	0.00208215	0.0228911	up in var2csa-mutant singles
PF3D7_0414600	2.27781	3.28616	10.2264	0.00138443	0.0167879	up in var2csa-mutant singles
PF3D7_1331300	2.27701	4.31652	9.16247	0.0024703	0.0258283	up in var2csa-mutant singles
PF3D7_0805100	2.27518	1.64324	10.8527	0.000986529	0.0129654	up in var2csa-mutant singles
PF3D7_0207800	2.27319	5.2106	13.8493	0.000198066	0.00386681	up in var2csa-mutant singles
PF3D7_0625200	2.26416	2.10903	7.55458	0.00598578	0.0469385	up in var2csa-mutant singles
PF3D7_1402200	2.26368	5.2515	12.7884	0.000348772	0.00585204	up in var2csa-mutant singles
PF3D7_1312500	2.26248	4.07996	10.5391	0.00116878	0.0146942	up in var2csa-mutant singles
PF3D7_1014000	2.25765	1.21111	8.84922	0.00293214	0.0290436	up in var2csa-mutant singles
PF3D7_0207400	2.25618	5.6292	13.7319	0.000210839	0.00406556	up in var2csa-mutant singles
PF3D7_0506400	2.25562	0.691292	7.73899	0.00540411	0.0439902	up in var2csa-mutant singles
PF3D7_0728200	2.2493	1.25652	8.61856	0.00332754	0.0313122	up in var2csa-mutant singles
PF3D7_0408000	2.24583	3.8705	10.7453	0.00104546	0.013528	up in var2csa-mutant singles
PF3D7_0616200	2.24293	4.24868	9.87302	0.0016772	0.0193412	up in var2csa-mutant singles
PF3D7_1209400	2.24265	5.001	10.8054	0.00101204	0.0131786	up in var2csa-mutant singles
PF3D7_1020100	2.24259	1.27621	8.00712	0.00465938	0.0400043	up in var2csa-mutant singles
PF3D7_0301800	2.2421	7.30254	25.0507	5.58436e-07	3.70062e-05	up in var2csa-mutant singles
PF3D7_1022800	2.23821	3.24675	8.14938	0.00430759	0.0380248	up in var2csa-mutant singles
PF3D7_1348500	2.23807	2.49428	8.77206	0.0030588	0.0298582	up in var2csa-mutant singles
PF3D7_0508000	2.23797	4.71374	9.05047	0.00262627	0.0268039	up in var2csa-mutant singles
PF3D7_0419300	2.23736	1.89568	8.67834	0.00322014	0.0306696	up in var2csa-mutant singles
PF3D7_1426300	2.23718	1.81311	9.74682	0.00179633	0.0204148	up in var2csa-mutant singles
PF3D7_1215000	2.23671	2.34992	9.10162	0.00255383	0.0262927	up in var2csa-mutant singles
PF3D7_0312100	2.23644	2.68195	7.859	0.00505684	0.0423183	up in var2csa-mutant singles
PF3D7_1235700	2.23337	4.3092	10.3376	0.00130349	0.0160548	up in var2csa-mutant singles
PF3D7_0705300	2.23295	4.18199	7.60844	0.00580958	0.0461314	up in var2csa-mutant singles
PF3D7_0707200	2.23185	3.76857	8.20526	0.0041769	0.0371499	up in var2csa-mutant singles
PF3D7_0723800	2.22997	4.29206	10.1708	0.00142683	0.0170821	up in var2csa-mutant singles
PF3D7_0406800	2.22725	2.56893	9.35776	0.00222043	0.0238519	up in var2csa-mutant singles
PF3D7_0509100	2.22606	5.29449	11.477	0.000704636	0.00989646	up in var2csa-mutant singles
PF3D7_0927300	2.22587	3.49797	9.01047	0.00268437	0.0272197	up in var2csa-mutant singles
PF3D7_1128700	2.22557	1.12856	9.10877	0.00254387	0.0262476	up in var2csa-mutant singles
PF3D7_0516800	2.22105	4.89207	9.73887	0.00180412	0.020454	up in var2csa-mutant singles
PF3D7_0934800	2.21987	6.15915	11.8202	0.000585912	0.00856123	up in var2csa-mutant singles
PF3D7_0605200	2.21708	2.82155	9.07989	0.00258436	0.0265489	up in var2csa-mutant singles
PF3D7_1020200	2.21393	1.57364	8.05548	0.00453663	0.0394544	up in var2csa-mutant singles
PF3D7_1019100	2.21364	4.5051	8.06619	0.00450988	0.0393249	up in var2csa-mutant singles
PF3D7_0419700	2.20611	3.21998	8.63397	0.00329952	0.0311107	up in var2csa-mutant singles
PF3D7_1334600	2.20569	2.00164	7.84537	0.00509511	0.0423183	up in var2csa-mutant singles
PF3D7_0814600	2.20394	2.37022	10.2894	0.00133799	0.0164366	up in var2csa-mutant singles
PF3D7_1459700	2.20064	2.14809	9.15081	0.00248608	0.0259357	up in var2csa-mutant singles
PF3D7_0208000	2.19956	4.21297	10.3483	0.00129594	0.0160418	up in var2csa-mutant singles
PF3D7_1338400	2.19722	2.03364	8.83251	0.0029591	0.0291878	up in var2csa-mutant singles
PF3D7_1317100	2.19688	5.81611	13.2879	0.000267129	0.00481549	up in var2csa-mutant singles
PF3D7_1435000	2.19202	2.3339	8.31719	0.00392715	0.0353294	up in var2csa-mutant singles
PF3D7_1432200	2.19169	2.91771	9.47122	0.0020872	0.0228911	up in var2csa-mutant singles
PF3D7_0605600	2.19098	1.76452	8.00799	0.00465713	0.0400043	up in var2csa-mutant singles
PF3D7_0903700	2.19021	5.0305	11.8889	0.000564694	0.00827691	up in var2csa-mutant singles
PF3D7_0207500	2.18706	5.80613	14.8353	0.000117321	0.00262854	up in var2csa-mutant singles
PF3D7_1358600	2.18649	2.39263	10.5353	0.00117116	0.0146942	up in var2csa-mutant singles
PF3D7_0910900	2.18586	2.63021	8.42881	0.00369322	0.0338281	up in var2csa-mutant singles
PF3D7_1344600	2.18231	2.36416	9.76386	0.00177975	0.0203246	up in var2csa-mutant singles
PF3D7_0904900	2.18071	4.49937	10.658	0.00109596	0.0139365	up in var2csa-mutant singles
PF3D7_1112100	2.17728	5.52244	8.03474	0.00458887	0.0398176	up in var2csa-mutant singles
PF3D7_0409500	2.17547	2.04368	8.49928	0.00355287	0.0330361	up in var2csa-mutant singles
PF3D7_0305600	2.16414	3.79407	7.73368	0.00542002	0.0440435	up in var2csa-mutant singles
PF3D7_1434400	2.16207	3.27272	9.94789	0.00161034	0.0186159	up in var2csa-mutant singles
PF3D7_0927800	2.15814	4.14803	9.6101	0.00193511	0.0216263	up in var2csa-mutant singles
PF3D7_1440400	2.15643	2.56364	8.12781	0.00435915	0.038336	up in var2csa-mutant singles
PF3D7_1224100	2.1537	3.95742	8.92732	0.00280937	0.0281835	up in var2csa-mutant singles
PF3D7_1207000	2.15141	4.2226	9.28977	0.00230437	0.0245295	up in var2csa-mutant singles
PF3D7_0924600	2.14962	3.2521	7.67879	0.00558738	0.044938	up in var2csa-mutant singles
PF3D7_0104100	2.14269	2.00679	9.14125	0.0024991	0.0259842	up in var2csa-mutant singles
PF3D7_1449400	2.14199	3.70628	7.48889	0.00620809	0.0484396	up in var2csa-mutant singles
PF3D7_1362700	2.14109	5.60765	12.0137	0.000528101	0.00786303	up in var2csa-mutant singles
PF3D7_0302500	2.13593	8.12754	15.9346	6.5568e-05	0.00166755	up in var2csa-mutant singles
PF3D7_1404400	2.13391	2.04961	7.81894	0.00517015	0.0425272	up in var2csa-mutant singles
PF3D7_1322000	2.12619	3.76114	7.61274	0.00579575	0.0461314	up in var2csa-mutant singles
PF3D7_1228700	2.12417	3.65505	9.72575	0.00181704	0.020551	up in var2csa-mutant singles
PF3D7_1227500	2.12357	5.16623	8.88422	0.00287646	0.0287341	up in var2csa-mutant singles
PF3D7_0934400	2.1219	4.14537	8.96698	0.00274902	0.0276963	up in var2csa-mutant singles
PF3D7_0607700	2.11763	3.2677	9.24976	0.00235526	0.0249583	up in var2csa-mutant singles
PF3D7_0715200	2.11685	3.32843	8.73871	0.00311524	0.0300183	up in var2csa-mutant singles
PF3D7_1229600	2.1166	5.33901	9.67297	0.00186999	0.0210486	up in var2csa-mutant singles
PF3D7_0626400	2.1103	3.47929	9.39284	0.00217835	0.0235612	up in var2csa-mutant singles
PF3D7_0303400	2.1087	2.69723	7.83417	0.00512677	0.0423183	up in var2csa-mutant singles
PF3D7_0317200	2.1039	5.85646	11.4592	0.000711419	0.00996198	up in var2csa-mutant singles
PF3D7_1456000	2.10244	3.33072	7.56379	0.00595526	0.0468554	up in var2csa-mutant singles
PF3D7_1438700	2.09846	3.72956	8.42766	0.00369556	0.0338281	up in var2csa-mutant singles
PF3D7_0215000	2.09712	3.05412	8.33463	0.00388963	0.0352708	up in var2csa-mutant singles
PF3D7_1401900	2.0956	3.26186	8.11188	0.00439761	0.0386022	up in var2csa-mutant singles
PF3D7_1322500	2.09534	3.90022	9.46339	0.00209613	0.0229043	up in var2csa-mutant singles
PF3D7_1361900	2.07498	5.64273	9.84941	0.00169886	0.0195432	up in var2csa-mutant singles
PF3D7_1206100	2.07383	1.55546	8.43322	0.00368428	0.0338281	up in var2csa-mutant singles
PF3D7_1138400	2.07165	2.82143	9.45893	0.00210123	0.0229043	up in var2csa-mutant singles
PF3D7_1014300	2.06214	5.00813	10.1996	0.00140468	0.0169029	up in var2csa-mutant singles
PF3D7_1320700	2.06149	3.0552	8.13272	0.00434735	0.0383039	up in var2csa-mutant singles
PF3D7_0919400	2.06052	3.01999	7.85447	0.00506953	0.0423183	up in var2csa-mutant singles
PF3D7_1125000	2.05792	3.98233	8.88749	0.00287132	0.0287341	up in var2csa-mutant singles
PF3D7_0504600	2.05717	3.41878	9.16711	0.00246404	0.0258202	up in var2csa-mutant singles
PF3D7_0407900	2.05536	6.00402	7.75094	0.00536846	0.043928	up in var2csa-mutant singles
PF3D7_0704500	2.05357	3.70809	7.88976	0.00497155	0.0419196	up in var2csa-mutant singles
PF3D7_0628400	2.04028	2.14842	7.93883	0.00483851	0.0412413	up in var2csa-mutant singles
PF3D7_1427200	2.0396	1.49947	7.57926	0.00590438	0.0465328	up in var2csa-mutant singles
PF3D7_0209600	2.03757	4.07405	9.13361	0.00250956	0.0260076	up in var2csa-mutant singles
PF3D7_1003400	2.02547	3.77451	7.83468	0.00512532	0.0423183	up in var2csa-mutant singles
PF3D7_0617300	2.00849	3.20193	8.3229	0.00391483	0.0353002	up in var2csa-mutant singles
PF3D7_0607600	2.00826	3.93228	9.03308	0.00265137	0.0270015	up in var2csa-mutant singles
PF3D7_1325900	2.00174	4.33286	8.58422	0.00339089	0.0316551	up in var2csa-mutant singles
PF3D7_1027300	1.99095	10.6783	19.3343	1.0972e-05	0.000430192	up in var2csa-mutant singles
PF3D7_0108600	1.98884	5.09082	7.43441	0.00639885	0.0494155	up in var2csa-mutant singles
PF3D7_1227600	1.98177	4.88768	8.72281	0.00314253	0.0301091	up in var2csa-mutant singles
PF3D7_1372400	1.98089	2.9192	7.70521	0.00550616	0.0445894	up in var2csa-mutant singles
PF3D7_1340700	1.97677	3.67035	8.06715	0.00450749	0.0393249	up in var2csa-mutant singles
PF3D7_0932100	1.97506	5.30422	10.8735	0.000975505	0.0128926	up in var2csa-mutant singles
PF3D7_1327300	1.97095	7.75083	11.6683	0.000635749	0.00906423	up in var2csa-mutant singles
PF3D7_1440100	1.96585	3.59337	7.40525	0.0065034	0.0499814	up in var2csa-mutant singles
PF3D7_1417800	1.96311	4.89296	10.1141	0.00147139	0.0173452	up in var2csa-mutant singles
PF3D7_0613600	1.96125	3.85269	8.75635	0.00308526	0.0298768	up in var2csa-mutant singles
PF3D7_0903300	1.95209	4.15396	7.92658	0.00487138	0.0413716	up in var2csa-mutant singles
PF3D7_0717000	1.94838	2.35165	7.58923	0.0058718	0.0464316	up in var2csa-mutant singles
PF3D7_0701900	1.94732	6.85706	14.508	0.000139567	0.00300233	up in var2csa-mutant singles
PF3D7_1344300	1.9442	4.83054	8.23368	0.00411201	0.036642	up in var2csa-mutant singles
PF3D7_0111500	1.94388	4.44231	7.99648	0.00468684	0.0401669	up in var2csa-mutant singles
PF3D7_0614000	1.93226	4.54086	7.48997	0.00620437	0.0484396	up in var2csa-mutant singles
PF3D7_1432700	1.92891	3.17738	7.43174	0.00640833	0.0494155	up in var2csa-mutant singles
PF3D7_1127500	1.92009	2.89996	8.19476	0.00420115	0.0372951	up in var2csa-mutant singles
PF3D7_1437700	1.91516	1.77675	7.63737	0.00571714	0.0457468	up in var2csa-mutant singles
PF3D7_0111000	1.90095	3.86614	8.60362	0.00335496	0.0315072	up in var2csa-mutant singles
PF3D7_1134300	1.88654	3.31981	7.40156	0.00651675	0.0499814	up in var2csa-mutant singles
PF3D7_1121300	1.88369	2.39513	7.61781	0.00577945	0.0460887	up in var2csa-mutant singles
PF3D7_1221300	1.86305	4.08521	8.3631	0.00382917	0.0348477	up in var2csa-mutant singles
PF3D7_0104200	1.85687	5.70477	8.86955	0.00289966	0.0289044	up in var2csa-mutant singles
PF3D7_0927200	1.83602	2.34145	7.49977	0.00617069	0.048308	up in var2csa-mutant singles
PF3D7_0916000	1.79631	5.10963	8.59019	0.00337979	0.0316141	up in var2csa-mutant singles
PF3D7_1436200	1.79272	3.56009	7.68426	0.00557046	0.044938	up in var2csa-mutant singles
PF3D7_1016900	1.77584	5.60862	8.54205	0.00347035	0.0323327	up in var2csa-mutant singles
PF3D7_0605900	1.75297	6.30798	12.0435	0.000519727	0.00781251	up in var2csa-mutant singles
PF3D7_0303200	1.74401	6.24417	8.84059	0.00294603	0.0291199	up in var2csa-mutant singles
PF3D7_1132800	1.72456	5.79556	9.23316	0.00237671	0.0250727	up in var2csa-mutant singles
PF3D7_0830500	1.7231	10.1825	13.9116	0.000191613	0.00377213	up in var2csa-mutant singles
PF3D7_0312400	1.65972	6.3784	8.75585	0.0030861	0.0298768	up in var2csa-mutant singles
PF3D7_0302200	1.59973	6.63399	8.41897	0.00371325	0.0338583	up in var2csa-mutant singles
PF3D7_1319400	1.54905	6.23062	7.84808	0.00508748	0.0423183	up in var2csa-mutant singles
PF3D7_0108500	1.45591	11.5857	10.2034	0.0014018	0.0169029	up in var2csa-mutant singles
PF3D7_1352900	1.38003	6.67893	7.91233	0.0049099	0.0416236	up in var2csa-mutant singles
PF3D7_1431400	1.35867	6.3505	7.7412	0.00539749	0.0439902	up in var2csa-mutant singles
PF3D7_1401100	1.28167	9.39982	12.1256	0.000497345	0.00750003	up in var2csa-mutant singles
PF3D7_0220000	1.24326	11.5343	7.59617	0.00584925	0.0463312	up in var2csa-mutant singles
PF3D7_1033400	-1.0027	9.7842	7.42926	0.00641719	0.0494155	up in var2csa-mutant manys
PF3D7_0614300	-1.02451	9.02603	8.59046	0.00337929	0.0316141	up in var2csa-mutant manys
PF3D7_1148700	-1.05544	10.1286	7.58408	0.0058886	0.0464864	up in var2csa-mutant manys
PF3D7_0702500	-1.08664	9.43042	8.8005	0.00301149	0.0295805	up in var2csa-mutant manys
PF3D7_0316600	-1.08706	10.0686	7.93324	0.00485349	0.0412942	up in var2csa-mutant manys
PF3D7_1311800	-1.13808	10.9484	7.67329	0.00560441	0.0449979	up in var2csa-mutant manys
PF3D7_1252300	-1.15067	9.37964	9.48572	0.00207078	0.0228709	up in var2csa-mutant manys
PF3D7_1354500	-1.15135	8.17546	9.18592	0.00243884	0.0256133	up in var2csa-mutant manys
PF3D7_1134000	-1.22341	9.44457	8.73471	0.00312209	0.0300183	up in var2csa-mutant manys
PF3D7_1340600	-1.23799	7.53665	8.15639	0.00429096	0.0379492	up in var2csa-mutant manys
PF3D7_1446200	-1.24068	10.9531	7.607	0.00581422	0.0461314	up in var2csa-mutant manys
PF3D7_1033200	-1.28333	7.55931	7.73942	0.00540283	0.0439902	up in var2csa-mutant manys
PF3D7_1452400	-1.32317	8.02728	7.84016	0.0051098	0.0423183	up in var2csa-mutant manys
PF3D7_1357900	-1.34545	7.80778	8.33103	0.00389736	0.0352708	up in var2csa-mutant manys
PF3D7_0501000	-1.36559	9.51705	8.18146	0.00423207	0.0374989	up in var2csa-mutant manys
PF3D7_1429400	-1.3703	7.0504	8.65955	0.00325352	0.0307474	up in var2csa-mutant manys
PF3D7_1118200	-1.37892	7.89866	8.85429	0.00292401	0.0290436	up in var2csa-mutant manys
PF3D7_0601900	-1.44422	9.01777	12.6966	0.000366311	0.00602621	up in var2csa-mutant manys
PF3D7_0727800	-1.56645	6.13389	8.02955	0.00460203	0.0398176	up in var2csa-mutant manys
PF3D7_1139300	-1.57689	8.56458	9.96999	0.00159113	0.0184391	up in var2csa-mutant manys
PF3D7_1022000	-1.59322	5.91587	7.39996	0.00652254	0.0499814	up in var2csa-mutant manys
PF3D7_0802000	-1.59731	9.62914	7.45604	0.0063224	0.0491135	up in var2csa-mutant manys
PF3D7_0220200	-1.61785	8.90546	8.79262	0.00302452	0.0296466	up in var2csa-mutant manys
PF3D7_1436000	-1.70478	8.99893	12.7152	0.000362695	0.00598765	up in var2csa-mutant manys
PF3D7_0707400	-1.72977	6.65423	9.38783	0.0021843	0.0235714	up in var2csa-mutant manys
PF3D7_1229300	-1.84699	5.85785	10.3439	0.00129903	0.0160418	up in var2csa-mutant manys
PF3D7_0810800	-1.88703	7.32624	8.06479	0.00451338	0.0393249	up in var2csa-mutant manys
PF3D7_0220600	-1.91945	6.60258	7.82996	0.00513872	0.0423427	up in var2csa-mutant manys
PF3D7_0731300	-1.99142	7.44163	8.69058	0.00319859	0.0305261	up in var2csa-mutant manys
PF3D7_1035800	-2.02247	8.04758	13.3617	0.000256819	0.00473857	up in var2csa-mutant manys
PF3D7_1107800	-2.04767	8.97678	13.7094	0.000213386	0.00408122	up in var2csa-mutant manys
PF3D7_0936200	-2.13337	6.50448	7.65195	0.00567111	0.0454558	up in var2csa-mutant manys
PF3D7_1415600	-2.13602	4.02641	8.71935	0.0031485	0.0301091	up in var2csa-mutant manys
PF3D7_1447900	-2.15923	5.80504	8.94926	0.00277583	0.0279066	up in var2csa-mutant manys
PF3D7_1337000	-2.41493	3.90175	8.73914	0.00311452	0.0300183	up in var2csa-mutant manys
PF3D7_1325800	-2.44429	4.60674	7.62311	0.00576251	0.0460316	up in var2csa-mutant manys
PF3D7_0726200	-2.48754	7.91683	15.0726	0.000103453	0.00240965	up in var2csa-mutant manys
PF3D7_0730900	-2.52241	11.5314	15.7921	7.06972e-05	0.00175995	up in var2csa-mutant manys
PF3D7_0301700	-2.70358	7.14372	12.4101	0.000427013	0.00669699	up in var2csa-mutant manys
PF3D7_1149000	-2.76221	7.87218	7.45508	0.00632578	0.0491135	up in var2csa-mutant manys
PF3D7_0405700	-2.9301	5.48036	8.00959	0.00465302	0.0400043	up in var2csa-mutant manys
PF3D7_1317200	-3.17488	5.97523	8.41976	0.00371164	0.0338583	up in var2csa-mutant manys
PF3D7_0424000	-3.19581	6.86516	12.3354	0.00044444	0.00692414	up in var2csa-mutant manys
PF3D7_1442400	-3.24834	6.39817	9.37015	0.00220547	0.0237454	up in var2csa-mutant manys
PF3D7_0831400	-3.61919	6.46032	14.2773	0.000157753	0.00322708	up in var2csa-mutant manys
PF3D7_1301200	-4.01508	7.33559	9.62869	0.00191561	0.0214594	up in var2csa-mutant manys
PF3D7_0700800	-4.21833	4.61243	7.67878	0.0055874	0.044938	up in var2csa-mutant manys
PF3D7_1242100	-4.57762	0.107868	11.1222	0.000852995	0.0114711	up in var2csa-mutant manys
PF3D7_1149400	-4.91449	6.28202	15.9589	6.4734e-05	0.00165529	up in var2csa-mutant manys
