# Supplementary material for: A coordinated transcriptional switching network mediates antigenic variation of human malaria parasites
Source: eLife. 2022 Dec 14;11:e83840. doi: 10.7554/eLife.83840 (PMC9833823; doi:10.7554/eLife.83840)
Supplement: Supplementary file 3. — Also shown are expression values described for each gene across the 48-hr asexual replication cycle as established in the published dataset from Bartfai et al. These values were used to establish the approximate position within the standard asexual cycle for each sample. [file elife-83840-supp3.xlsx]

## Sheet: Table-s2
Supplementary File 3: Annotation numbers and gene ontology terms for each of 562 genes upregulated in var2csa-mutant "single" lines when compared to var2csa-mutant "many" lines. Also shown are expression values described for each gene across the 48-hour asexual replication cycle as established in the published dataset from Bartfai et al. These values were used to establish the approximate positio…
Gene ID	source_id	Input ID	pfal3D7_Stunnenberg_pi_time_series - Hour 5 - unique (3D7 iRBC RNA-Seq)	pfal3D7_Stunnenberg_pi_time_series - Hour 10 - unique (3D7 iRBC RNA-Seq)	pfal3D7_Stunnenberg_pi_time_series - Hour 15 - unique (3D7 iRBC RNA-Seq)	pfal3D7_Stunnenberg_pi_time_series - Hour 20 - unique (3D7 iRBC RNA-Seq)	pfal3D7_Stunnenberg_pi_time_series - Hour 25 - unique (3D7 iRBC RNA-Seq)	pfal3D7_Stunnenberg_pi_time_series - Hour 30 - unique (3D7 iRBC RNA-Seq)	pfal3D7_Stunnenberg_pi_time_series - Hour 35 - unique (3D7 iRBC RNA-Seq)	pfal3D7_Stunnenberg_pi_time_series - Hour 40 - unique (3D7 iRBC RNA-Seq)	Transcript Product Description
PF3D7_0102500	PF3D7_0102500.1	PF3D7_0102500	1761.24	389.29	40.42	10.47	1.94	2.33	3.58	75.51	erythrocyte binding antigen-181
PF3D7_0104100	PF3D7_0104100.1	PF3D7_0104100	22.06	5.25	1.77	0.97	0.68	3.29	29.6	69.34	protein E140, putative
PF3D7_0104200	PF3D7_0104200.1	PF3D7_0104200	1358.02	277.76	42.89	52.13	112.87	94.51	89.54	128.49	StAR-related lipid transfer protein
PF3D7_0105300	PF3D7_0105300.1	PF3D7_0105300	168.75	28.75	7.8	6.34	2.81	21.19	93.88	317.25	cyclase-associated protein
PF3D7_0105800	PF3D7_0105800.1	PF3D7_0105800	61.21	18.35	7.18	3.68	19.76	79.54	127.65	174.51	cyclin-dependent kinases regulatory subunit, putative
PF3D7_0106000	PF3D7_0106000.1	PF3D7_0106000	47.92	9.89	2.74	19.42	7.03	30.82	51.31	113.88	conserved protein, unknown function
PF3D7_0107000	PF3D7_0107000.1	PF3D7_0107000	31.87	28.67	20.09	14.63	72.96	274.1	471.56	565.41	centrin-1
PF3D7_0108500	PF3D7_0108500.1	PF3D7_0108500	193.27	148.05	85.78	32.04	6.6	3.09	2.92	2.11	ELM2 domain-containing protein, putative
PF3D7_0108600	PF3D7_0108600.1	PF3D7_0108600	5.67	8.87	4.09	3.55	8.55	52.85	56.53	33.11	DnaJ domain-containing protein, putative
PF3D7_0109000	PF3D7_0109000.1	PF3D7_0109000	1835.99	352.76	50.62	11.65	5.03	4.23	3.73	93	photosensitized INA-labeled protein PHIL1
PF3D7_0109100	PF3D7_0109100.1	PF3D7_0109100	109.29	25.46	9.48	5.01	2.33	2.46	2.15	6.35	LCCL domain-containing protein
PF3D7_0111000	PF3D7_0111000.1	PF3D7_0111000	16.55	7.75	4.06	4.32	9.87	20.17	30.19	35.7	kinesin-8B, putative
PF3D7_0111500	PF3D7_0111500.1	PF3D7_0111500	117.7	27.19	7.64	12.2	70.53	170.79	168.04	252.09	UMP-CMP kinase, putative
PF3D7_0202800	PF3D7_0202800.1	PF3D7_0202800	1.51	0.38	0.16	0.07	0.41	3.97	6.59	8.58	conserved Plasmodium protein, unknown function
PF3D7_0203000	PF3D7_0203000.1	PF3D7_0203000	538.26	113.05	21.7	10.1	26.42	68.23	131.43	164.23	repetitive organellar protein, putative
PF3D7_0203400	PF3D7_0203400.1	PF3D7_0203400	10.22	7.45	3.44	3.76	28.37	95.63	156.68	163.42	conserved Plasmodium protein, unknown function
PF3D7_0204100	PF3D7_0204100.1	PF3D7_0204100	52.06	15.94	5.51	3.16	7.19	18	60.71	192.76	Sel1 repeat-containing protein, putative
PF3D7_0206200	PF3D7_0206200.1	PF3D7_0206200	352.32	85.9	15.23	9.33	8.54	9.62	9.92	42.12	pantothenate transporter
PF3D7_0206800	PF3D7_0206800.1	PF3D7_0206800	78.54	17.74	3.9	1.73	0.88	1.24	16.21	52.96	merozoite surface protein 2
PF3D7_0207000	PF3D7_0207000.1	PF3D7_0207000	987.4	234.34	30.7	10.75	44.83	174.7	460.59	1165.82	merozoite surface protein 4
PF3D7_0207100	PF3D7_0207100.1	PF3D7_0207100	435.4	89.5	12.75	4.72	20.1	55.26	81.78	116.06	conserved Plasmodium protein, unknown function
PF3D7_0207200	PF3D7_0207200.1	PF3D7_0207200	71.4	15.79	2.61	3.11	14.86	29.76	26.61	20.5	iron-sulfur assembly protein, putative
PF3D7_0207400	PF3D7_0207400.1	PF3D7_0207400	45.63	21.09	4.83	0.73	1.18	30.56	237.8	408.92	serine repeat antigen 7
PF3D7_0207500	PF3D7_0207500.1	PF3D7_0207500	38.87	14.33	2.64	0.61	0.33	28.92	283.25	628.91	serine repeat antigen 6
PF3D7_0207600	PF3D7_0207600.1	PF3D7_0207600	365.9	78.19	12.77	3.12	1.14	56.39	1418.74	4876.78	serine repeat antigen 5
PF3D7_0207700	PF3D7_0207700.1	PF3D7_0207700	40.13	9.86	2.06	0.72	0.45	10.73	143.15	402.65	serine repeat antigen 4
PF3D7_0207800	PF3D7_0207800.1	PF3D7_0207800	45.11	16.44	5.58	1.44	1.65	24.33	160	401.63	serine repeat antigen 3
PF3D7_0207900	PF3D7_0207900.1	PF3D7_0207900	7.81	4.5	1.75	0.35	0.79	5.17	24.98	45.72	serine repeat antigen 2
PF3D7_0208000	PF3D7_0208000.1	PF3D7_0208000	23.15	9.19	3.56	0.64	1.27	3.54	38.82	131.29	serine repeat antigen 1
PF3D7_0209600	PF3D7_0209600.1	PF3D7_0209600	21.66	7.41	1.62	1.31	0.65	3.66	29.71	106.73	transporter, putative
PF3D7_0210600	PF3D7_0210600.1	PF3D7_0210600	766.95	178.61	29.26	7.82	9.55	11.6	14.8	89.66	protein CERLI1
PF3D7_0210700	PF3D7_0210700.1	PF3D7_0210700	228.42	48.7	12.15	5.73	10.11	13.15	13.16	26.67	syntaxin, Qa-SNARE family
PF3D7_0211500	PF3D7_0211500.1	PF3D7_0211500	22.32	8	2.76	1.93	4.81	16.85	31.89	51.92	GAF domain-related protein, putative
PF3D7_0211600	PF3D7_0211600.1	PF3D7_0211600	9.8	5.27	1.35	0.31	3.28	12.84	26.48	63.08	UDP-N-acetylglucosamine transferase subunit ALG14, putative
PF3D7_0212600	PF3D7_0212600.1	PF3D7_0212600	934.12	280.64	36.25	9.14	9.39	24.14	14.73	58.24	secreted protein with altered thrombospondin repeat domain
PF3D7_0212900	PF3D7_0212900.1	PF3D7_0212900	79.12	15.98	4.59	1.97	8.33	49.1	97.76	170.18	arginyl-tRNA--protein transferase
PF3D7_0214600	PF3D7_0214600.1	PF3D7_0214600	1400.13	436.71	56.01	12.9	2.29	2.51	2.44	73.68	serine/threonine protein kinase STK2, putative
PF3D7_0214900	PF3D7_0214900.1	PF3D7_0214900	1835.77	383.59	52.34	15.66	16.49	23.68	113.3	1093.95	rhoptry neck protein 6
PF3D7_0215000	PF3D7_0215000.1	PF3D7_0215000	32.6	38.18	80.28	80.69	73.42	86.88	95.54	80.48	acyl-CoA synthetase
PF3D7_0216000	PF3D7_0216000.1	PF3D7_0216000	20.67	21.26	15.87	13.14	6.12	10.28	14.23	13.52	DEAD/DEAH box helicase, putative
PF3D7_0216800	PF3D7_0216800.1	PF3D7_0216800	14.63	4.6	0.3	0	0.4	2.63	20.31	55.69	TMEM121 domain-containing protein, putative
PF3D7_0217100	PF3D7_0217100.1	PF3D7_0217100	13.94	13.55	5.29	4.05	19.52	118.34	171.04	162.15	ATP synthase subunit alpha, mitochondrial
PF3D7_0217500	PF3D7_0217500.1	PF3D7_0217500	1848.95	1998.03	1834.86	1420.42	619.1	633.36	248.52	712.02	calcium-dependent protein kinase 1
PF3D7_0218100	PF3D7_0218100.1	PF3D7_0218100	34.11	5.83	2.06	1.39	5.57	21.95	66.12	129.95	conserved protein, unknown function
PF3D7_0220000	PF3D7_0220000.1	PF3D7_0220000	5947.89	3555.88	1967.28	988.18	324.64	317.33	434.51	224.41	liver stage antigen 3
PF3D7_0220800	PF3D7_0220800.1	PF3D7_0220800	97.47	18.19	2.88	2.71	5.89	8.06	19.25	225.89	cytoadherence linked asexual protein 2
PF3D7_0301800	PF3D7_0301800.1	PF3D7_0301800	705.51	541.72	173.61	30.1	8.79	6.69	4.2	6.98	Plasmodium exported protein, unknown function
PF3D7_0302200	PF3D7_0302200.1	PF3D7_0302200	156.14	38.09	6.67	1.91	0.57	0.71	24.02	264.88	cytoadherence linked asexual protein 3.2
PF3D7_0302500	PF3D7_0302500.1	PF3D7_0302500	372.9	76.82	13.4	5.14	14.14	14.25	79.95	706.55	cytoadherence linked asexual protein 3.1
PF3D7_0303200	PF3D7_0303200.1	PF3D7_0303200	423.14	137.38	38.83	45.01	65.57	111.63	221.27	371.47	lipin, putative
PF3D7_0303400	PF3D7_0303400.1	PF3D7_0303400	15.05	5.67	3.28	0.84	1.59	5.88	33.46	85.35	palmitoyltransferase DHHC1
PF3D7_0304000	PF3D7_0304000.1	PF3D7_0304000	5.05	3.73	1.31	0.2	6.93	9.26	4.2	1.03	inner membrane complex protein 1a, putative
PF3D7_0304100	PF3D7_0304100.1	PF3D7_0304100	190.88	54.38	14.45	7.67	4.04	2.22	2.35	33.32	inner membrane complex protein 1e, putative
PF3D7_0305600	PF3D7_0305600.1	PF3D7_0305600	36.11	15	8.04	5.97	30.68	113.42	220.85	265.04	DNA-(apurinic or apyrimidinic site) endonuclease
PF3D7_0306000	PF3D7_0306000.1	PF3D7_0306000	19.52	7.24	2.56	0.24	11.64	43.11	65.42	85.93	cytochrome b-c1 complex subunit 8, putative
PF3D7_0306500	PF3D7_0306500.1	PF3D7_0306500	19.09	10.81	3.76	3.48	12.4	40.13	76.15	105.08	cytochrome c oxidase subunit ApiCOX35, putative
PF3D7_0308100	PF3D7_0308100.1	PF3D7_0308100	66.76	13.31	3.55	0.99	1.49	2.5	39.5	201.98	zinc finger protein, putative
PF3D7_0308300	PF3D7_0308300.1	PF3D7_0308300	361.4	77.19	10.55	3.26	1.9	1.52	1.23	45.65	PhIL1-interacting candidate PIC4
PF3D7_0308700	PF3D7_0308700.1	PF3D7_0308700	142.37	35.83	9.14	4.11	2.08	5.04	10	53.86	conserved protein, unknown function
PF3D7_0308800	PF3D7_0308800.1	PF3D7_0308800	91.33	27.93	7.25	5.31	22.03	74.75	79.38	96.98	conserved protein, unknown function
PF3D7_0311300	PF3D7_0311300.1	PF3D7_0311300	77.94	28.74	8.98	9.38	36.88	65.54	119.14	177.97	phosphatidylinositol 3- and 4-kinase, putative
PF3D7_0312100	PF3D7_0312100.1	PF3D7_0312100	9.65	7.31	4.46	3.3	14.89	39.55	81.76	91.44	E3 ubiquitin-protein ligase
PF3D7_0312400	PF3D7_0312400.1	PF3D7_0312400	56.36	28.77	13.47	17.71	72.65	141.1	194.27	211.06	glycogen synthase kinase 3
PF3D7_0313600	PF3D7_0313600.1	PF3D7_0313600	59.07	52.02	41.95	44	135.49	233.36	294.38	178.31	conserved Plasmodium protein, unknown function
PF3D7_0314900	PF3D7_0314900.1	PF3D7_0314900	29.48	7.47	1.77	1.31	2.46	19.74	48.99	94.52	conserved Plasmodium membrane protein, unknown function
PF3D7_0315600	PF3D7_0315600.1	PF3D7_0315600	11.59	12.33	5.13	2.22	7.89	26.75	43.78	41.44	zinc finger protein, putative
PF3D7_0316000	PF3D7_0316000.1	PF3D7_0316000	397.76	82	10.66	2.44	6.25	12.65	10.77	14.79	microneme associated antigen
PF3D7_0316100	PF3D7_0316100.1	PF3D7_0316100	207.7	46.66	6.87	5.22	19.99	50.53	60.3	44.87	ribosomal protein L27, mitochondrial, putative
PF3D7_0317200	PF3D7_0317200.1	PF3D7_0317200	130.5	38.42	8.73	8.52	48.86	180.77	367.39	567.52	cdc2-related protein kinase 4
PF3D7_0318500	PF3D7_0318500.1	PF3D7_0318500	74.21	15.79	3.6	1.35	0.73	1.22	2.86	31.89	conserved Plasmodium protein, unknown function
PF3D7_0318700	PF3D7_0318700.1	PF3D7_0318700	942.42	197.45	24.96	3.69	1.58	0.23	1.22	32.04	conserved Plasmodium protein, unknown function
PF3D7_0318800	PF3D7_0318800.1	PF3D7_0318800	11.36	1.18	1.56	1.45	0.26	0.45	0.36	0.82	triosephosphate isomerase, putative
PF3D7_0319400	PF3D7_0319400.1	PF3D7_0319400	9.2	7.74	5.31	2.62	6.53	56.76	120.91	117.26	kinesin-8X
PF3D7_0320700	PF3D7_0320700.1	PF3D7_0320700	182.82	52.8	12.99	18.57	130.99	312.13	416.41	392.95	signal peptidase complex subunit 2
PF3D7_0321400	PF3D7_0321400.1	PF3D7_0321400	97.65	18.22	1.69	1.56	1.63	1.45	6.98	115.87	pseudo protein kinase 1, putative
PF3D7_0323400	PF3D7_0323400.1	PF3D7_0323400	767.51	155.27	18.79	3.6	3.51	6.19	4.82	27.57	Rh5 interacting protein
PF3D7_0400200	PF3D7_0400200.1	PF3D7_0400200	265.82	120.19	45.1	110.59	393.51	252.46	242.41	566.24	erythrocyte membrane protein 1 (PfEMP1), exon 2, pseudogene
PF3D7_0401900	PF3D7_0401900.1	PF3D7_0401900	264.47	261.5	116.98	44.74	5.61	4.51	2.1	3.39	acyl-CoA synthetase
PF3D7_0402200	PF3D7_0402200.1	PF3D7_0402200	2000.12	853.7	225.6	46.66	7.41	4.62	3.24	49.99	surface-associated interspersed protein 4.1 (SURFIN 4.1), pseudogene
PF3D7_0402300	PF3D7_0402300.1	PF3D7_0402300	1556.92	395.66	49.5	10.05	4.48	7.15	3.16	31.5	reticulocyte binding protein homologue 1
PF3D7_0403900	PF3D7_0403900.1	PF3D7_0403900	63.53	17.06	5.84	1.95	1.87	12.42	26.65	54.28	SET domain protein, putative
PF3D7_0404000	PF3D7_0404000.1	PF3D7_0404000	384.05	90.73	12.4	4.04	5.98	6.53	7.51	84.8	conserved Plasmodium protein, unknown function
PF3D7_0404700	PF3D7_0404700.1	PF3D7_0404700	510.63	92.57	12.96	5.47	0.69	0.86	24.59	280.13	dipeptidyl aminopeptidase 3
PF3D7_0405900	PF3D7_0405900.1	PF3D7_0405900	629.21	125.53	19.53	5.42	3.22	12.42	43.72	562.6	apical sushi protein
PF3D7_0406800	PF3D7_0406800.1	PF3D7_0406800	10.48	5.98	4.75	1.03	17.04	62.82	63.51	55.57	ribosomal protein L25, putative
PF3D7_0407700	PF3D7_0407700.1	PF3D7_0407700	269.4	66.81	16.62	8.27	15.02	27.34	82.43	255.43	conserved Plasmodium protein, unknown function
PF3D7_0407800	PF3D7_0407800.1	PF3D7_0407800	282.26	84.2	13.72	3.42	1.63	6.45	62.21	232.67	protein CINCH
PF3D7_0407900	PF3D7_0407900.1	PF3D7_0407900	1377.07	256.59	42.51	52.88	82.07	96.14	101.85	120.43	AAA family ATPase, putative
PF3D7_0408000	PF3D7_0408000.1	PF3D7_0408000	1592.2	345.94	36.05	9.82	7.89	8.78	6.94	42.64	conserved Plasmodium protein, unknown function
PF3D7_0408500	PF3D7_0408500.1	PF3D7_0408500	38.06	22.65	8.01	7.01	52.61	149.03	304.23	294.43	flap endonuclease 1
PF3D7_0408700	PF3D7_0408700.1	PF3D7_0408700	1.08	1.42	0.78	0.62	1.5	1.93	1.66	3.08	perforin-like protein 1
PF3D7_0409500	PF3D7_0409500.1	PF3D7_0409500	11.31	6.4	3.36	3.26	5.01	59.07	86.46	80.14	NAD(P)-binding protein, putative
PF3D7_0413500	PF3D7_0413500.1	PF3D7_0413500	36.85	12.12	3.53	1.38	4.98	45.02	140.87	282.93	phosphoglucomutase-2
PF3D7_0414600	PF3D7_0414600.1	PF3D7_0414600	65.92	16.65	3.76	4	6.3	24.16	48.83	103.21	acylated pleckstrin-homology domain-containing protein, putative
PF3D7_0414800	PF3D7_0414800.1	PF3D7_0414800	359.05	44.75	5.55	1.47	1.53	1.64	3.16	13.71	conserved Plasmodium protein, unknown function
PF3D7_0414900	PF3D7_0414900.1	PF3D7_0414900	1012.94	249.11	28.39	8.64	1.96	1.92	3.11	107.8	armadillo-domain containing rhoptry protein
PF3D7_0415800	PF3D7_0415800.1	PF3D7_0415800	164.29	30.59	4	1.18	2.68	7.93	7.48	11.9	PhIL1-interacting candidate PIC3
PF3D7_0418600	PF3D7_0418600.1	PF3D7_0418600	480.93	101.33	13	3.53	3.62	4.29	5.25	38.28	regulator of chromosome condensation, putative
PF3D7_0419300	PF3D7_0419300.1	PF3D7_0419300	14.21	4.33	2.06	1.71	6.22	37.46	65.02	82.4	conserved Plasmodium protein, unknown function
PF3D7_0419400	PF3D7_0419400.1	PF3D7_0419400	19.85	4.05	1	0.46	0.53	1.86	27.52	96.89	conserved Plasmodium protein, unknown function
PF3D7_0419700	PF3D7_0419700.1	PF3D7_0419700	188.4	47.24	17.53	14.14	12.54	8.23	23.55	154.21	apical merozoite protein
PF3D7_0423300	PF3D7_0423300.1	PF3D7_0423300	594	109.55	22.08	5.58	2.24	6.28	40.55	422.96	conserved Plasmodium protein, unknown function
PF3D7_0423400	PF3D7_0423400.1	PF3D7_0423400	281.25	63.01	19.15	26.59	67.72	6.82	20.97	190.32	apical asparagine-rich protein AARP
PF3D7_0423500	PF3D7_0423500.1	PF3D7_0423500	279.81	92.77	25.85	15.76	19.06	30.65	97.4	457.19	glideosome associated protein with multiple membrane spans 2
PF3D7_0423800	PF3D7_0423800.1	PF3D7_0423800	304.63	64.96	15.09	5.18	7.06	21.06	22.99	54.44	cysteine-rich protective antigen
PF3D7_0424100	PF3D7_0424100.1	PF3D7_0424100	789.22	127.17	18.36	12.92	17.41	8.02	3.99	41.98	reticulocyte binding protein homologue 5
PF3D7_0424200	PF3D7_0424200.1	PF3D7_0424200	1203.81	246.06	28.99	8.6	9.07	11.64	5.06	22.05	reticulocyte binding protein homologue 4
PF3D7_0424300	PF3D7_0424300.1	PF3D7_0424300	810.05	194.63	18.68	9.53	9.97	7.51	2.56	22.74	erythrocyte binding antigen-165, pseudogene
PF3D7_0501500	PF3D7_0501500.1	PF3D7_0501500	211.99	47.01	9.04	2.75	0.48	0.11	22.71	332.38	rhoptry-associated protein 3
PF3D7_0501600	PF3D7_0501600.1	PF3D7_0501600	615.91	115.94	22.47	4.49	1.68	1.53	43.14	716.73	rhoptry-associated protein 2
PF3D7_0503400	PF3D7_0503400.1	PF3D7_0503400	2832.52	739.12	109.88	48.8	211.54	631.3	905.56	1517.91	actin-depolymerizing factor 1
PF3D7_0503600	PF3D7_0503600.1	PF3D7_0503600	682.18	158.59	23.91	6.85	3.01	4.82	5.28	32.85	myosin B
PF3D7_0504600	PF3D7_0504600.1	PF3D7_0504600	29.39	14.96	6.97	6.01	5.54	29.24	75.02	135.84	2-oxoisovalerate dehydrogenase subunit beta, mitochondrial, putative
PF3D7_0505300	PF3D7_0505300.1	PF3D7_0505300	51.23	11.86	2.31	0.58	3.2	12.5	24.81	25.55	UDP-N-acetylglucosamine transporter, putative
PF3D7_0506400	PF3D7_0506400.1	PF3D7_0506400	84.82	15.71	2.42	2.99	0	2.09	2.48	14.07	conserved Plasmodium protein, unknown function
PF3D7_0506900	PF3D7_0506900.1	PF3D7_0506900	137.26	36.15	10.71	9.25	10.07	12.78	61.7	347.14	rhomboid protease ROM4
PF3D7_0507300	PF3D7_0507300.1	PF3D7_0507300	187.44	27.32	3.08	1.42	0.46	0.4	0.43	4.28	subtilisin-like ookinete protein SOPT
PF3D7_0507400	PF3D7_0507400.1	PF3D7_0507400	453.76	73.98	7.79	2.11	0.71	2.29	5.64	35.03	subtilisin propeptide-like protein
PF3D7_0507500	PF3D7_0507500.1	PF3D7_0507500	1077.97	260.75	35.43	9.78	6.05	5.32	5.35	66.79	subtilisin-like protease 1
PF3D7_0508000	PF3D7_0508000.1	PF3D7_0508000	66.69	19.65	7.72	4.01	2.22	1.4	55.01	283.27	6-cysteine protein
PF3D7_0508100	PF3D7_0508100.1	PF3D7_0508100	81.17	25.54	6.3	3.03	1.27	3.87	69.79	250.95	SET domain protein, putative
PF3D7_0508900	PF3D7_0508900.1	PF3D7_0508900	430.99	133.09	27.57	12.24	5.98	24.57	187.5	545.74	protein AAP6
PF3D7_0509100	PF3D7_0509100.1	PF3D7_0509100	45.73	22.24	10.95	6.29	32.76	169.63	334.11	345.05	structural maintenance of chromosomes protein 4, putative
PF3D7_0515400	PF3D7_0515400.1	PF3D7_0515400	296.74	59.27	10.13	5.1	3.04	3.22	6.45	66.8	conserved protein, unknown function
PF3D7_0515700	PF3D7_0515700.1	PF3D7_0515700	494.89	121.28	24.2	8.61	9.6	34.84	175.8	1031.51	glideosome-associated protein 40, putative
PF3D7_0516800	PF3D7_0516800.1	PF3D7_0516800	40.26	26.39	16.52	11.77	10.94	36.23	164.08	183.07	AP2 domain transcription factor AP2-O2, putative
PF3D7_0522400	PF3D7_0522400.1	PF3D7_0522400	74.61	19.59	5.69	2.65	2.35	7.75	28.01	73.73	conserved Plasmodium protein, unknown function
PF3D7_0522500	PF3D7_0522500.1	PF3D7_0522500	29.71	14.86	5.66	2.62	42.1	101.92	176.67	240.32	50S ribosomal protein L17, apicoplast, putative
PF3D7_0522600	PF3D7_0522600.1	PF3D7_0522600	45.39	10.3	2.33	0.9	0.65	0.67	10.92	69.38	magnesium transporter NIPA, putative
PF3D7_0525300	PF3D7_0525300.1	PF3D7_0525300	222.06	45.3	7.14	2.7	5.79	17.06	17.58	24.02	conserved protein, unknown function
PF3D7_0525400	PF3D7_0525400.1	PF3D7_0525400	40.8	4.31	1.85	0.85	3.02	12.74	16.9	23.03	7-helix-1 protein
PF3D7_0525700	PF3D7_0525700.1	PF3D7_0525700	0	0	0	0	0	0	0	0	conserved protein, unknown function
PF3D7_0525800	PF3D7_0525800.1	PF3D7_0525800	2882.45	644.22	74.61	15.78	10.46	13.8	8.71	236.51	inner membrane complex protein 1g, putative
PF3D7_0527000	PF3D7_0527000.1	PF3D7_0527000	84.81	49.04	28.64	29.08	128.24	364.66	571.22	686.64	DNA replication licensing factor MCM3, putative
PF3D7_0528300	PF3D7_0528300.1	PF3D7_0528300	53.16	12	2.64	1.26	1.01	0.29	0.74	13.05	conserved protein, unknown function
PF3D7_0528400	PF3D7_0528400.1	PF3D7_0528400	261.92	61.35	10.84	4.57	1.12	1.44	19.16	188.25	palmitoyltransferase DHHC7
PF3D7_0530300	PF3D7_0530300.1	PF3D7_0530300	33.71	9.96	2.58	1.8	6.68	14.25	34.71	74.32	PhIL1-interacting candidate PIC6
PF3D7_0530900	PF3D7_0530900.1	PF3D7_0530900	34.25	10.72	3.91	2.2	1.24	1.01	15.66	72.79	formin 1
PF3D7_0531300	PF3D7_0531300.1	PF3D7_0531300	34.74	11.22	6.31	6.44	23.96	65.25	81.6	70.25	conserved Plasmodium protein, unknown function
PF3D7_0603800	PF3D7_0603800.1	PF3D7_0603800	27.34	9.55	5.28	3.06	7.82	21.78	47.94	115.55	centrosomal protein CEP76, putative
PF3D7_0604100	PF3D7_0604100.1	PF3D7_0604100	87.99	25.19	4.87	1.5	1.16	1.76	61.79	301.17	AP2 domain transcription factor
PF3D7_0605200	PF3D7_0605200.1	PF3D7_0605200	11.31	6.26	3.35	3.33	8.05	65.02	75	100.04	acylphosphatase, putative
PF3D7_0605300	PF3D7_0605300.1	PF3D7_0605300	11.23	11.07	9.58	4.99	7.02	32.65	52.42	58.19	serine/threonine protein kinase ARK1
PF3D7_0605500	PF3D7_0605500.1	PF3D7_0605500	6.79	4.83	1.86	1.49	2.49	15.73	35.15	55.9	cyclin dependent kinase binding protein, putative
PF3D7_0605600	PF3D7_0605600.1	PF3D7_0605600	10.52	10.05	4.75	3.78	2.88	5.3	4.57	2.32	nucleoside diphosphate kinase, putative
PF3D7_0605700	PF3D7_0605700.1	PF3D7_0605700	12.44	9.35	1.99	2.76	0.25	1.43	1.19	3.55	conserved Plasmodium protein, unknown function
PF3D7_0605900	PF3D7_0605900.1	PF3D7_0605900	657.62	370.61	86.92	26.91	14.77	18.09	22.94	42.87	elongation of fatty acids protein, putative
PF3D7_0607600	PF3D7_0607600.1	PF3D7_0607600	11.69	5.57	2.03	0.58	3.29	14.38	49.59	111.37	spindle assembly abnormal protein 6, putative
PF3D7_0607700	PF3D7_0607700.1	PF3D7_0607700	31.84	14.64	7.65	4.47	3.27	1.75	38.39	121.51	conserved Plasmodium protein, unknown function
PF3D7_0610000	PF3D7_0610000.1	PF3D7_0610000	5.48	4.31	2.89	2.99	14.2	46.4	51.97	42.46	ribosomal protein L19, mitochondrial, putative
PF3D7_0610400	PF3D7_0610400.1	PF3D7_0610400	8.95	6.09	1.16	0.64	3.11	11.2	30.7	50.97	histone H3
PF3D7_0611100	PF3D7_0611100.1	PF3D7_0611100	11.14	4.49	1.73	2.14	5.58	33.84	73.46	97.85	succinate dehydrogenase subunit 3, putative
PF3D7_0612200	PF3D7_0612200.1	PF3D7_0612200	105.19	48.38	20.7	10.46	9.8	43.18	206.61	340.22	leucine-rich repeat protein
PF3D7_0613300	PF3D7_0613300.1	PF3D7_0613300	474.09	93.99	13.86	3.53	1.92	4.35	19.03	279.33	rhoptry protein ROP14
PF3D7_0613400	PF3D7_0613400.1	PF3D7_0613400	56.26	25.16	8.7	15.87	60.2	137.5	228.35	309.13	50S ribosomal protein L18, apicoplast, putative
PF3D7_0613600	PF3D7_0613600.1	PF3D7_0613600	122.73	29.73	4.48	2.89	12.14	22.14	21.54	28.01	conserved Plasmodium protein, unknown function
PF3D7_0613800	PF3D7_0613800.1	PF3D7_0613800	129.18	42.67	9.07	4.76	9.78	60.8	350.19	639.67	AP2 domain transcription factor, putative
PF3D7_0613900	PF3D7_0613900.1	PF3D7_0613900	1735.24	444.56	57.9	14.79	10.06	11.22	10.72	157.69	myosin E, putative
PF3D7_0614000	PF3D7_0614000.1	PF3D7_0614000	245.12	76.95	16.91	20.73	69.31	118.91	159.93	161.34	thiamine-phosphate synthase, putative
PF3D7_0614700	PF3D7_0614700.1	PF3D7_0614700	107.13	22.21	7.77	2.97	4.59	4.47	8.39	84.74	F-box protein FBXO6, putative
PF3D7_0616200	PF3D7_0616200.1	PF3D7_0616200	75.55	28.04	16.09	17.53	80.13	149.62	190.16	226.35	kinetochore protein NDC80, putative
PF3D7_0617300	PF3D7_0617300.1	PF3D7_0617300	74.77	31.12	8.82	4.08	8	30.18	79.76	193.42	conserved Plasmodium protein, unknown function
PF3D7_0618000	PF3D7_0618000.1	PF3D7_0618000	345.58	67.41	10.23	2.34	1.59	1.4	6.82	102	conserved Plasmodium membrane protein, unknown function
PF3D7_0620400	PF3D7_0620400.1	PF3D7_0620400	159.87	28	47.8	35.11	27.2	47.21	4.4	42.28	merozoite surface protein 10
PF3D7_0621100	PF3D7_0621100.1	PF3D7_0621100	91.05	23.19	6.69	4.18	4.04	9.86	23.75	119.05	conserved Plasmodium protein, unknown function
PF3D7_0622600	PF3D7_0622600.1	PF3D7_0622600	36.68	11.53	3.51	2.84	34.28	108.92	179.85	208.43	cytochrome b-c1 complex subunit 9, putative
PF3D7_0625200	PF3D7_0625200.1	PF3D7_0625200	35.56	12.85	6.6	5.43	20.97	45.67	79.07	108.77	conserved Plasmodium protein, unknown function
PF3D7_0626400	PF3D7_0626400.1	PF3D7_0626400	39.6	14.15	6.97	3.81	4.91	31.2	58.34	83.96	CRAL/TRIO domain-containing protein, putative
PF3D7_0628100	PF3D7_0628100.1	PF3D7_0628100	114.37	25.03	4.43	1.44	0.75	0.87	4.6	78.42	HECT domain-containing protein 1, putative
PF3D7_0628300	PF3D7_0628300.1	PF3D7_0628300	3938.6	1219.39	170.8	57.41	143.61	313.21	309.23	383.45	choline/ethanolaminephosphotransferase, putative
PF3D7_0628400	PF3D7_0628400.1	PF3D7_0628400	38.59	13.04	7	2.59	1.34	2.07	2.96	2.41	protease, putative
PF3D7_0629300	PF3D7_0629300.1	PF3D7_0629300	165.86	44.81	4.1	1.03	0.83	1.25	1.62	16.09	phospholipase, putative
PF3D7_0701900	PF3D7_0701900.1	PF3D7_0701900	1569.79	1201.29	418.06	115.71	17.71	3.53	1.78	8.49	Plasmodium exported protein, unknown function
PF3D7_0702100	PF3D7_0702100.1	PF3D7_0702100	1209.31	484.09	126.77	23.81	6.17	3.03	2.87	13.47	Plasmodium exported protein (PHISTb), unknown function, pseudogene
PF3D7_0703600	PF3D7_0703600.1	PF3D7_0703600	192.9	74.44	49.07	43.54	63.54	106.38	190.98	440.57	conserved protein, unknown function
PF3D7_0704500	PF3D7_0704500.1	PF3D7_0704500	38.92	11.14	3.12	1.96	2.25	1.82	57.59	244.39	serine/threonine protein kinase, putative
PF3D7_0704800	PF3D7_0704800.1	PF3D7_0704800	39.17	7.25	1.38	1.34	3.68	11.31	11.06	21.35	protein phosphatase PPM12, putative
PF3D7_0705300	PF3D7_0705300.1	PF3D7_0705300	47.45	18.18	6.63	8.61	37.62	90.35	157.98	199.83	origin recognition complex subunit 2
PF3D7_0705400	PF3D7_0705400.1	PF3D7_0705400	32.04	15.88	6.3	4.68	46.6	153.93	237.09	318.71	DNA replication licensing factor MCM7
PF3D7_0707200	PF3D7_0707200.1	PF3D7_0707200	31.71	11.16	3.22	5.77	24.66	42.47	69.36	96.87	conserved Plasmodium protein, unknown function
PF3D7_0707300	PF3D7_0707300.1	PF3D7_0707300	3758.02	777.87	126.47	30.24	6.02	4.76	301.89	3010.7	rhoptry-associated membrane antigen
PF3D7_0709900	PF3D7_0709900.1	PF3D7_0709900	9.79	6.3	2.85	1.37	2.18	5.64	13.23	21.07	hydrolase, putative
PF3D7_0715200	PF3D7_0715200.1	PF3D7_0715200	30.59	16.82	10.52	7	9.49	36.86	82.62	102.37	conserved Plasmodium protein, unknown function
PF3D7_0715500	PF3D7_0715500.1	PF3D7_0715500	4.96	6	3.7	2.28	41.08	118.57	113.97	71.09	ATP synthase subunit epsilon, mitochondrial, putative
PF3D7_0717000	PF3D7_0717000.1	PF3D7_0717000	13.93	8.03	6.57	6.93	14.67	35.18	68.06	124.15	conserved Plasmodium membrane protein, unknown function
PF3D7_0717600	PF3D7_0717600.1	PF3D7_0717600	40.77	11.67	4.83	3.38	10.5	32.91	80.68	124.82	inner membrane complex protein, putative
PF3D7_0722200	PF3D7_0722200.1	PF3D7_0722200	2630.4	498.09	72.65	19.5	3.32	3.62	132.71	1698.55	rhoptry-associated leucine zipper-like protein 1
PF3D7_0723200	PF3D7_0723200.1	PF3D7_0723200	6.21	2.3	0.53	1.46	0.59	2.95	1.48	4.06	conserved Plasmodium protein, unknown function
PF3D7_0723300	PF3D7_0723300.1	PF3D7_0723300	92.9	27.26	5.78	6.19	10.69	17.84	33.91	103.55	conserved protein, unknown function
PF3D7_0723800	PF3D7_0723800.1	PF3D7_0723800	173.07	48.53	15.29	13.45	48.58	86.95	172.32	242.55	conserved Plasmodium protein, unknown function
PF3D7_0724800	PF3D7_0724800.1	PF3D7_0724800	145.33	43.02	12.49	7.85	15.09	43.9	66.1	76.15	kelch domain-containing protein, putative
PF3D7_0724900	PF3D7_0724900.1	PF3D7_0724900	89.54	40.57	11.76	5.66	2.31	2.43	2.48	5.01	kinesin-20, putative
PF3D7_0725400	PF3D7_0725400.1	PF3D7_0725400	5056.39	1132.45	155.4	33.42	6.13	5.75	18.26	347.2	conserved Plasmodium protein, unknown function
PF3D7_0728200	PF3D7_0728200.1	PF3D7_0728200	4.55	3.63	1.54	0.95	1.91	11.09	22.82	26.21	actin-like protein, putative
PF3D7_0728600	PF3D7_0728600.1	PF3D7_0728600	53.22	37.24	19.54	13.53	20.89	82.92	202.38	215.24	RING zinc finger protein, putative
PF3D7_0730400	PF3D7_0730400.1	PF3D7_0730400	1892.19	464.23	58.81	23.09	25.2	48.66	51.93	232.51	IMP1-like protein, putative
PF3D7_0730500	PF3D7_0730500.1	PF3D7_0730500	137.82	37.34	8.67	5.48	34.94	88.44	152.81	170.69	conserved Plasmodium protein, unknown function
PF3D7_0731500	PF3D7_0731500.1	PF3D7_0731500	4980.04	1396.62	183.23	44.83	15.93	14.16	6.69	98.62	erythrocyte binding antigen-175
PF3D7_0802100	PF3D7_0802100.1	PF3D7_0802100	93.16	24.7	6.24	3.45	2.73	11.92	58.22	148.82	AP2 domain transcription factor, putative
PF3D7_0802600	PF3D7_0802600.1	PF3D7_0802600	250.42	67.14	13.9	5.86	6.18	9.08	27.66	157.15	adenylyl cyclase beta
PF3D7_0802800	PF3D7_0802800.1	PF3D7_0802800	202.02	48.79	8.71	3.8	2.59	6.19	50.1	212.51	serine/threonine protein phosphatase 2B catalytic subunit A
PF3D7_0803200	PF3D7_0803200.1	PF3D7_0803200	236.34	58.82	14.84	9.07	5.25	28.35	153.34	504.78	filament assembling protein, putative
PF3D7_0803400	PF3D7_0803400.1	PF3D7_0803400	50.23	28.68	12.52	5.99	23.25	113.35	180.55	255.84	DNA repair and recombination protein RAD54, putative
PF3D7_0805100	PF3D7_0805100.1	PF3D7_0805100	19.87	10.17	4.81	2.56	1.07	0.97	1.47	3.98	conserved protein, unknown function
PF3D7_0805200	PF3D7_0805200.1	PF3D7_0805200	1629.03	509.84	90.47	21.11	2.08	1.75	2.46	27.86	gamete release protein, putative
PF3D7_0805300	PF3D7_0805300.1	PF3D7_0805300	632.67	107.68	12.4	3.66	2.19	8.21	7.57	27.76	conserved Plasmodium protein, unknown function
PF3D7_0806200	PF3D7_0806200.1	PF3D7_0806200	35.44	10.26	4.1	1.63	1.37	2.96	21.9	89.79	Dpy-19-like C-mannosyltransferase
PF3D7_0806300	PF3D7_0806300.1	PF3D7_0806300	21.78	6.45	2.65	1.08	0.71	0.78	23.13	79.44	ferlin-like protein, putative
PF3D7_0808200	PF3D7_0808200.1	PF3D7_0808200	809.57	227	35.68	11.18	5.52	1.88	1.15	40.65	plasmepsin X
PF3D7_0810300	PF3D7_0810300.1	PF3D7_0810300	1439.96	348.85	57.97	38.99	37.39	55	109.93	421.32	protein phosphatase PPM5, putative
PF3D7_0811000	PF3D7_0811000.1	PF3D7_0811000	29.08	6.61	2.26	0.94	6.17	23.54	41.9	76.18	cullin-1, putative
PF3D7_0813100	PF3D7_0813100.1	PF3D7_0813100	55.56	13.26	3.39	2.62	3.75	6.04	17.35	103.66	conserved Plasmodium protein, unknown function
PF3D7_0814600	PF3D7_0814600.1	PF3D7_0814600	18.25	28	10.79	4.22	0.18	0.21	0.25	0.64	PIMMS22 protein, putative
PF3D7_0816400	PF3D7_0816400.1	PF3D7_0816400	23.04	9.49	6.37	2.76	12.14	43.92	71.01	118.16	EF-hand calcium-binding domain-containing protein, putative
PF3D7_0817600	PF3D7_0817600.1	PF3D7_0817600	447.6	88.94	14.36	5.92	3.34	7.74	19.03	245.96	conserved protein, unknown function
PF3D7_0817700	PF3D7_0817700.1	PF3D7_0817700	232.21	45.22	8.39	2.35	2.18	5.61	28.94	332.25	rhoptry neck protein 5
PF3D7_0817800	PF3D7_0817800.1	PF3D7_0817800	59.97	18.14	5.35	1.71	6.18	28.81	45.77	119.14	conserved Plasmodium protein, unknown function
PF3D7_0818100	PF3D7_0818100.1	PF3D7_0818100	740.2	244.09	29.11	5.84	3.31	5.6	5.59	35.86	zinc finger protein, putative
PF3D7_0821000	PF3D7_0821000.1	PF3D7_0821000	41.13	11.95	3.42	3.87	24.12	56.11	95.09	146.46	conserved Plasmodium protein, unknown function
PF3D7_0822900	PF3D7_0822900.1	PF3D7_0822900	1639.29	445.04	59.07	9.84	1.85	1.3	2.81	134.19	PhIL1-interacting candidate PIC2
PF3D7_0828600	PF3D7_0828600.1	PF3D7_0828600	55.35	14.19	4.18	2.32	1.6	3.61	13.87	92.67	folate transporter 1
PF3D7_0828800	PF3D7_0828800.1	PF3D7_0828800	663.83	168.69	22.69	4.99	2.97	2.6	2.4	18.4	GPI-anchored micronemal antigen
PF3D7_0829800	PF3D7_0829800.1	PF3D7_0829800	16.3	6.54	3.72	3.35	1.69	16.06	10.21	11.02	non-coding RNA
PF3D7_0829900	PF3D7_0829900.1	PF3D7_0829900	54.99	22.35	6.88	8.93	3.39	31.05	28.14	28.15	non-coding RNA
PF3D7_0830500	PF3D7_0830500.1	PF3D7_0830500	4239.58	5813.13	2606.59	680.28	91.41	37.55	19.36	35.71	sporozoite and liver stage tryptophan-rich protein, putative
PF3D7_0831600	PF3D7_0831600.1	PF3D7_0831600	107.51	20.62	4.51	1.82	1.17	2.59	19.09	163.43	cytoadherence linked asexual protein 8
PF3D7_0902100	PF3D7_0902100.1	PF3D7_0902100	61.09	10.37	2.32	1.14	2.76	4.79	3.87	29.08	serine/threonine protein kinase, FIKK family
PF3D7_0903300	PF3D7_0903300.1	PF3D7_0903300	44.17	22.56	8.49	4.22	3.79	35.41	181.2	265.01	conserved protein, unknown function
PF3D7_0903700	PF3D7_0903700.1	PF3D7_0903700	32.84	25.84	13.78	12.95	46.59	176.7	227.81	382.82	alpha tubulin 1
PF3D7_0904900	PF3D7_0904900.1	PF3D7_0904900	33.18	15.09	6.9	4.89	45.57	189.23	353.87	302.06	copper-transporting ATPase
PF3D7_0905400	PF3D7_0905400.1	PF3D7_0905400	1370.01	300.03	56.04	14.92	3.17	12.86	502.97	3809.27	high molecular weight rhoptry protein 3
PF3D7_0905500	PF3D7_0905500.1	PF3D7_0905500	124.96	24.97	3.77	1.66	0.4	0.31	19.4	105.66	conserved protein, unknown function
PF3D7_0906100	PF3D7_0906100.1	PF3D7_0906100	21.05	22.61	7.2	6.66	44.08	154.04	191.37	241.66	vacuolar protein sorting-associated protein 46, putative
PF3D7_0908200	PF3D7_0908200.1	PF3D7_0908200	51.99	13.55	4.33	1.25	3.8	16.1	43.45	67.38	conserved Plasmodium protein, unknown function
PF3D7_0908400	PF3D7_0908400.1	PF3D7_0908400	63.3	16.11	3.96	1.9	15.7	83.12	191.15	273.67	conserved Plasmodium protein, unknown function
PF3D7_0908500	PF3D7_0908500.1	PF3D7_0908500	58.86	11.79	2.6	1.12	2.15	5.13	5.1	31.85	conserved Plasmodium protein, unknown function
PF3D7_0909500	PF3D7_0909500.1	PF3D7_0909500	9.18	4.22	1.26	0.74	0.6	0.2	0.76	4.75	subpellicular microtubule protein 1, putative
PF3D7_0910900	PF3D7_0910900.1	PF3D7_0910900	3.64	2.77	1.75	1.42	8.31	61.55	91.35	70.44	DNA primase large subunit, putative
PF3D7_0911000	PF3D7_0911000.1	PF3D7_0911000	42.78	13	5.86	4.52	9.7	47.32	92.75	97.46	phosphatidylinositol N-acetylglucosaminyltransferase, putative
PF3D7_0911100	PF3D7_0911100.1	PF3D7_0911100	1701	395.72	52.2	13.48	3.93	4.51	8.47	59.9	conserved protein, unknown function
PF3D7_0913800	PF3D7_0913800.1	PF3D7_0913800	2682.12	797.01	85.79	21.2	8.14	8.25	16.08	194.95	conserved Plasmodium protein, unknown function
PF3D7_0914100	PF3D7_0914100.1	PF3D7_0914100	822.61	193.34	31.53	14.19	21.59	71.65	83.71	205.03	conserved Plasmodium protein, unknown function
PF3D7_0914400	PF3D7_0914400.1	PF3D7_0914400	85.28	27.21	7.46	6.33	5.55	9.91	66.08	346.91	protein KIC3
PF3D7_0915700	PF3D7_0915700.1	PF3D7_0915700	29.79	17.75	10.6	5.69	13.42	44.25	98.67	131.63	cytochrome c oxidase subunit ApiCOX30, putative
PF3D7_0916000	PF3D7_0916000.1	PF3D7_0916000	109.61	30.1	9.69	5.99	5.69	6.19	10.71	78.29	major facilitator superfamily domain-containing protein, putative
PF3D7_0917300	PF3D7_0917300.1	PF3D7_0917300	43.36	8.23	0.91	0.36	0.19	0	6.32	82.01	conserved protein, unknown function
PF3D7_0917400	PF3D7_0917400.1	PF3D7_0917400	46.84	11.2	2.21	0.41	1.14	3.35	9.61	58.3	conserved Plasmodium protein, unknown function
PF3D7_0917500	PF3D7_0917500.1	PF3D7_0917500	14.84	10.06	5.26	4.1	38.87	105.09	166.14	139.94	conserved protein, unknown function
PF3D7_0918000	PF3D7_0918000.1	PF3D7_0918000	260.27	69	20.69	10.54	20.99	118.32	398.03	1004.11	glideosome-associated protein 50
PF3D7_0918700	PF3D7_0918700.1	PF3D7_0918700	944.32	423.3	114.99	24.89	4.39	2.41	3.28	19.89	conserved Plasmodium protein, unknown function
PF3D7_0919200	PF3D7_0919200.1	PF3D7_0919200	517.53	131.74	20.27	5.9	5.22	4.95	5.86	38.1	PPPDE peptidase, putative
PF3D7_0919300	PF3D7_0919300.1	PF3D7_0919300	154.66	91.92	16.83	4.98	1.22	1.21	1.79	12.69	thioredoxin-like protein 1, putative
PF3D7_0919400	PF3D7_0919400.1	PF3D7_0919400	12.89	7.8	4.64	1.85	4.24	36.28	107.66	181.28	protein disulfide-isomerase PDI-Trans
PF3D7_0919900	PF3D7_0919900.1	PF3D7_0919900	144.04	42.65	11.73	9.48	14.41	31.24	163.4	379.47	regulator of chromosome condensation-PP1-interacting protein
PF3D7_0920500	PF3D7_0920500.1	PF3D7_0920500	297.17	68.94	9.33	4.32	7.46	24.27	32	86.67	ADP-ribosylation factor, putative
PF3D7_0920600	PF3D7_0920600.1	PF3D7_0920600	155.92	45.08	7.49	2.27	12.53	27.92	53.99	66.05	conserved Plasmodium protein, unknown function
PF3D7_0920700	PF3D7_0920700.1	PF3D7_0920700	402.05	91.66	12.57	8.35	28.75	45.1	44.21	107.29	CRAL/TRIO domain-containing protein, putative
PF3D7_0924300	PF3D7_0924300.1	PF3D7_0924300	36.82	4.97	1.76	2.28	15.07	47.22	64.28	40.13	thiamine pyrophosphokinase
PF3D7_0924600	PF3D7_0924600.1	PF3D7_0924600	27.03	14.93	8.66	5.71	4.1	7	25.16	71.49	conserved Plasmodium protein, unknown function
PF3D7_0925600	PF3D7_0925600.1	PF3D7_0925600	10.48	4.23	1.09	1.67	3.37	9.83	15.36	29.59	zinc binding protein (Yippee), putative
PF3D7_0927200	PF3D7_0927200.1	PF3D7_0927200	34.28	11.25	4.79	3.06	1.58	1.7	3.94	4.74	zinc finger protein, putative
PF3D7_0927300	PF3D7_0927300.1	PF3D7_0927300	17.31	7.31	3.55	1.97	5.97	21.72	48.6	89.17	fumarate hydratase
PF3D7_0927800	PF3D7_0927800.1	PF3D7_0927800	31.79	13.29	5.75	5.16	23.94	69.72	133.38	174.13	cytochrome c oxidase subunit 5B, putative
PF3D7_0929400	PF3D7_0929400.1	PF3D7_0929400	385.81	80.04	14.9	3.8	1.73	10.72	215.84	1293.77	high molecular weight rhoptry protein 2
PF3D7_0929500	PF3D7_0929500.1	PF3D7_0929500	0	0.44	0.9	1.25	0.33	0	0.92	0.3	CH domain-containing protein, putative
PF3D7_0929600	PF3D7_0929600.1	PF3D7_0929600	59.66	16.99	7.19	3.04	2.75	1.06	0.84	20.5	G2 protein, putative
PF3D7_0930200	PF3D7_0930200.1	PF3D7_0930200	251.63	29.3	4.52	1.91	3.07	5.5	11.89	49.05	leucine-rich repeat protein
PF3D7_0930300	PF3D7_0930300.1	PF3D7_0930300	7467.31	1987.13	251.94	47.08	11.26	119.2	1211.43	4116.66	merozoite surface protein 1
PF3D7_0932000	PF3D7_0932000.1	PF3D7_0932000	114.07	30.52	8.96	4.56	4.67	14.68	12.14	42.18	conserved Plasmodium protein, unknown function
PF3D7_0932100	PF3D7_0932100.1	PF3D7_0932100	451.72	164.79	59.3	21.96	16.06	41.69	124.26	285.05	protein MAM3, putative
PF3D7_0932200	PF3D7_0932200.1	PF3D7_0932200	826.22	203.93	24.85	9.06	34.71	172.55	298.05	880.05	profilin
PF3D7_0933700	PF3D7_0933700.1	PF3D7_0933700	10.84	5.07	0.31	1.7	2.51	31.96	85.98	100.8	conserved Plasmodium protein, unknown function
PF3D7_0934400	PF3D7_0934400.1	PF3D7_0934400	71.28	39.27	11.61	17.47	103.94	204.76	187.02	241.66	AP2 domain transcription factor, putative
PF3D7_0934800	PF3D7_0934800.1	PF3D7_0934800	337.83	79.48	17.95	9.65	10.69	9.89	62.42	450.93	cAMP-dependent protein kinase catalytic subunit
PF3D7_1001600	PF3D7_1001600.1	PF3D7_1001600	89.44	21.57	4.84	1.65	10.65	58.01	191.19	433.34	exported lipase 2
PF3D7_1003100	PF3D7_1003100.1	PF3D7_1003100	11.29	7.26	4.39	4.87	11.43	47.46	81.07	74.52	conserved protein, unknown function
PF3D7_1003400	PF3D7_1003400.1	PF3D7_1003400	203.85	57.67	15.24	7.71	5.17	6.25	19.31	88.61	conserved Plasmodium protein, unknown function
PF3D7_1003600	PF3D7_1003600.1	PF3D7_1003600	3423.32	829.69	101.77	24.2	19.97	14.97	9.45	216.12	inner membrane complex protein 1c, putative
PF3D7_1005800	PF3D7_1005800.1	PF3D7_1005800	60.8	13.26	1.8	1.3	4.33	10.02	17.52	68.09	conserved Plasmodium membrane protein, unknown function
PF3D7_1007200	PF3D7_1007200.1	PF3D7_1007200	85.9	22.36	4.45	1.45	1.29	5.75	22.44	84.77	rho GTPase-activating protein, putative
PF3D7_1007300	PF3D7_1007300.1	PF3D7_1007300	104.85	21.96	3.76	1.32	1	0.72	0.98	23.08	RING zinc finger protein, putative
PF3D7_1008200	PF3D7_1008200.1	PF3D7_1008200	8.31	2.18	1.38	0.96	0.77	5.49	13.47	27	flap endonuclease, putative
PF3D7_1008700	PF3D7_1008700.1	PF3D7_1008700	62.06	67.7	39.46	31.69	70.47	151.15	190.28	273.33	tubulin beta chain
PF3D7_1009700	PF3D7_1009700.1	PF3D7_1009700	129.58	27.47	5.03	3.73	4.53	2.73	9.23	128.16	tubulin--tyrosine ligase, putative
PF3D7_1012200	PF3D7_1012200.1	PF3D7_1012200	1036.53	212.41	34.19	7.35	3.6	9.83	60.12	791.33	rhoptry associated adhesin
PF3D7_1012300	PF3D7_1012300.1	PF3D7_1012300	43.71	12.44	5.19	2.23	14.62	59.92	99.29	130.79	cytochrome b-c1 complex subunit 7, putative
PF3D7_1013800	PF3D7_1013800.1	PF3D7_1013800	1126.23	237.44	40.07	12.1	23.65	80.27	89.36	627.49	conserved Plasmodium protein, unknown function
PF3D7_1014000	PF3D7_1014000.1	PF3D7_1014000	25.29	4.73	1	0.4	1.6	10.72	9.79	7.28	GDP-L-fucose synthase
PF3D7_1014100	PF3D7_1014100.1	PF3D7_1014100	993.43	219.32	25.85	3.54	0.46	0.29	0.6	51.67	merozoite surface protein MSA180
PF3D7_1014300	PF3D7_1014300.1	PF3D7_1014300	33.49	25.24	14.24	12.16	39.77	140.84	201.49	161.2	SPRY domain-containing protein, putative
PF3D7_1014900	PF3D7_1014900.1	PF3D7_1014900	206.01	48.7	9.44	5.11	11	20.95	42.15	264.06	protein KIC8
PF3D7_1016000	PF3D7_1016000.1	PF3D7_1016000	315.88	66.33	9.32	2.96	8.12	12.78	12.88	26.23	conserved Plasmodium protein, unknown function
PF3D7_1016900	PF3D7_1016900.1	PF3D7_1016900	224.51	293.92	212.22	140.66	127.5	195.47	235.97	223.17	early transcribed membrane protein 10.3
PF3D7_1017100	PF3D7_1017100.1	PF3D7_1017100	230.11	41.82	9.49	2.32	11.18	45.41	62.11	253.44	rhoptry neck protein 12
PF3D7_1017200	PF3D7_1017200.1	PF3D7_1017200	6.87	1.56	0.89	1.15	7.02	13.5	16.46	14.19	enoyl-CoA hydratase-related protein, putative
PF3D7_1018200	PF3D7_1018200.1	PF3D7_1018200	59.38	16.11	2.72	1.65	1.69	3.88	23.09	155.59	serine/threonine protein phosphatase 8, putative
PF3D7_1019100	PF3D7_1019100.1	PF3D7_1019100	71.57	20.82	11.04	6.13	2.58	3.14	25.79	152.84	conserved Plasmodium protein, unknown function
PF3D7_1019600	PF3D7_1019600.1	PF3D7_1019600	28.33	8.53	3.57	1.44	2.56	9.85	27.98	75.09	conserved Plasmodium protein, unknown function
PF3D7_1020100	PF3D7_1020100.1	PF3D7_1020100	34.23	12.6	7.77	7.19	3	1.98	1.47	2.31	flagellar outer arm dynein-associated protein, putative
PF3D7_1020200	PF3D7_1020200.1	PF3D7_1020200	61.02	30.76	18.67	17.28	8.12	19.88	52.28	46.89	conserved Plasmodium protein, unknown function
PF3D7_1021200	PF3D7_1021200.1	PF3D7_1021200	41.11	17.33	6.12	7.35	38.42	98.49	153.79	145.28	conserved Plasmodium protein, unknown function
PF3D7_1021800	PF3D7_1021800.1	PF3D7_1021800	278.01	77.02	22.15	13.99	47.71	102.84	227.52	467.55	schizont egress antigen-1
PF3D7_1022800	PF3D7_1022800.1	PF3D7_1022800	15.25	6.53	2.64	3.62	34.56	95.36	140.98	120.12	4-hydroxy-3-methylbut-2-en-1-yl diphosphate synthase (ferredoxin), putative
PF3D7_1022900	PF3D7_1022900.1	PF3D7_1022900	18.42	8.56	5	2.59	19.34	47.21	57.01	90.8	CDGSH iron-sulfur domain-containing protein, putative
PF3D7_1023800	PF3D7_1023800.1	PF3D7_1023800	45.44	9.75	2.61	1.31	1.3	3.57	8.97	7.67	conserved Plasmodium protein, unknown function
PF3D7_1025400	PF3D7_1025400.1	PF3D7_1025400	104.16	19.12	3.62	1.81	3.89	12.09	30.34	103.5	conserved Plasmodium membrane protein, unknown function
PF3D7_1025700	PF3D7_1025700.1	PF3D7_1025700	16.45	10.14	6.66	3.21	47.61	222.11	198.58	124.15	conserved protein, unknown function
PF3D7_1025800	PF3D7_1025800.1	PF3D7_1025800	10.53	3.72	1.91	1.77	3.25	19.75	44.48	70.37	conserved protein, unknown function
PF3D7_1026500	PF3D7_1026500.1	PF3D7_1026500	457.81	172.47	22.21	7.31	4.04	1.7	11.61	51.28	conserved Plasmodium protein, unknown function
PF3D7_1026600	PF3D7_1026600.1	PF3D7_1026600	7891	2722.33	375.06	131.59	69.78	52.59	40.97	234.54	conserved Plasmodium protein, unknown function
PF3D7_1027300	PF3D7_1027300.1	PF3D7_1027300	8213.29	5526.99	2190.86	949.24	363.21	779.2	3342.76	9582.46	peroxiredoxin
PF3D7_1028200	PF3D7_1028200.1	PF3D7_1028200	18.14	6.08	3.81	1.83	11.57	38.38	63.9	84.48	RING zinc finger protein, putative
PF3D7_1028600	PF3D7_1028600.1	PF3D7_1028600	201.61	64.82	29.28	17.27	21.8	88.37	251.71	297.08	conserved Plasmodium protein, unknown function
PF3D7_1028700	PF3D7_1028700.1	PF3D7_1028700	2248.85	474.56	50.9	11.26	6.63	24.79	59.6	181.7	merozoite TRAP-like protein
PF3D7_1028800	PF3D7_1028800.1	PF3D7_1028800	72.34	21.65	5.87	2.49	16.92	56.92	90.49	139.93	conserved protein, unknown function
PF3D7_1028900	PF3D7_1028900.1	PF3D7_1028900	90.43	18.91	3.79	0.88	1.41	1.09	1.37	15.77	inner membrane complex protein 1m, putative
PF3D7_1029900	PF3D7_1029900.1	PF3D7_1029900	83.24	32.86	9.52	5.76	3.72	7.54	110.59	407.13	ORC3 domain-containing protein, putative
PF3D7_1030200	PF3D7_1030200.1	PF3D7_1030200	257.13	72.26	18.21	8.21	4.45	4.11	5.59	66.85	claudin-like apicomplexan microneme protein, putative
PF3D7_1034700	PF3D7_1034700.1	PF3D7_1034700	30.38	5.45	1.4	0.65	4.95	20.36	35.95	84.87	ADP-ribosylation factor, putative
PF3D7_1035100	PF3D7_1035100.1	PF3D7_1035100	114.38	23.39	4.08	1.3	0.42	1.21	47.78	217.6	probable protein, unknown function
PF3D7_1035200	PF3D7_1035200.1	PF3D7_1035200	2625.98	381.12	47.71	8.77	0.97	3.73	314.67	2344.42	S-antigen
PF3D7_1035300	PF3D7_1035300.1	PF3D7_1035300	450.44	124.96	20.13	5.47	0.55	0.45	3.08	92.86	glutamate-rich protein GLURP
PF3D7_1035400	PF3D7_1035400.1	PF3D7_1035400	7648.19	1822.09	240.27	50.55	39.78	84.52	260.31	1246.67	merozoite surface protein 3
PF3D7_1035500	PF3D7_1035500.1	PF3D7_1035500	7464.17	1666.53	215.69	70.71	119.36	50.17	16.87	668.08	merozoite surface protein 6
PF3D7_1035600	PF3D7_1035600.1	PF3D7_1035600	125.46	26.74	5.96	1.53	0.62	1	27.42	170.05	merozoite surface protein
PF3D7_1035700	PF3D7_1035700.1	PF3D7_1035700	1436.15	349.61	32.95	6.06	1.02	1.84	50.19	281.93	duffy binding-like merozoite surface protein
PF3D7_1035900	PF3D7_1035900.1	PF3D7_1035900	1370.13	313.63	37.42	8.35	5.79	4.47	24.63	328.16	merozoites-associated armadillo repeats protein
PF3D7_1036000	PF3D7_1036000.1	PF3D7_1036000	1883.29	511.43	56.44	9.9	3.64	2.85	15.13	87.02	merozoite surface protein 11
PF3D7_1036300	PF3D7_1036300.1	PF3D7_1036300	142.81	49.88	9.04	2.98	1.93	0.11	0.82	15.1	duffy binding-like merozoite surface protein 2
PF3D7_1036400	PF3D7_1036400.1	PF3D7_1036400	35.61	11.62	1.3	0.68	0.36	0.21	0.08	0.44	liver stage antigen 1
PF3D7_1036500	PF3D7_1036500.1	PF3D7_1036500	1459.65	342.15	36.68	9.62	18.84	21.98	16.21	61.85	conserved Plasmodium protein, unknown function
PF3D7_1037500	PF3D7_1037500.1	PF3D7_1037500	71.89	18.71	6.3	2.04	6.33	7.62	8.47	41.02	dynamin-like protein
PF3D7_1038400	PF3D7_1038400.1	PF3D7_1038400	2.44	4.45	2.77	2.05	0.86	0.85	0.87	0.51	gametocyte-specific protein
PF3D7_1104900	PF3D7_1104900.1	PF3D7_1104900	930.99	248.17	37.09	10.96	10.27	13.1	12.24	146.73	calcium/calmodulin-dependent protein kinase, putative
PF3D7_1107100	PF3D7_1107100.1	PF3D7_1107100	31.58	16.68	7.08	2.37	5.42	26.99	81.06	183.51	nucleic acid binding protein, putative
PF3D7_1108100	PF3D7_1108100.1	PF3D7_1108100	95.44	25.12	8.42	4.15	1.69	0.67	0.98	16.54	conserved Plasmodium protein, unknown function
PF3D7_1108500	PF3D7_1108500.1	PF3D7_1108500	18.88	15.04	7.12	5.23	11.81	83.1	150.5	244.32	succinate--CoA ligase [ADP-forming] subunit alpha, putative
PF3D7_1110600	PF3D7_1110600.1	PF3D7_1110600	44.14	19.76	6.71	8.28	30.78	83.85	133.53	176.8	ribosomal protein L11, mitochondrial, putative
PF3D7_1110700	PF3D7_1110700.1	PF3D7_1110700	40.89	15.54	5.76	4.65	4.07	14.66	43.07	122.64	actin-like protein, putative
PF3D7_1112100	PF3D7_1112100.1	PF3D7_1112100	319.3	84.32	25.27	20.1	59.71	121.52	209.66	316.01	conserved Plasmodium protein, unknown function
PF3D7_1112600	PF3D7_1112600.1	PF3D7_1112600	17.92	5.19	2.36	3.23	20.53	51	77.25	52.49	ATPase, putative
PF3D7_1112900	PF3D7_1112900.1	PF3D7_1112900	46.19	13.28	5.26	3.1	1.07	2.06	5.87	36.25	conserved protein, unknown function
PF3D7_1113000	PF3D7_1113000.1	PF3D7_1113000	14.73	4.71	1.35	0.9	1.44	2.42	4.93	23.46	conserved Plasmodium protein, unknown function
PF3D7_1116000	PF3D7_1116000.1	PF3D7_1116000	453.04	106.45	18.56	5.75	3.59	9.04	48.12	442.37	rhoptry neck protein 4
PF3D7_1116100	PF3D7_1116100.1	PF3D7_1116100	702.21	177.49	24.79	8.55	23.26	51.42	145.87	260.33	serine esterase, putative
PF3D7_1116900	PF3D7_1116900.1	PF3D7_1116900	29.95	15.1	4.88	3.69	1.98	4.21	9.52	36.26	conserved protein, unknown function
PF3D7_1118700	PF3D7_1118700.1	PF3D7_1118700	212.65	43.87	10.01	4.04	1.34	3.83	24.62	244.36	myosin light chain B
PF3D7_1121300	PF3D7_1121300.1	PF3D7_1121300	15.19	5.84	1.4	0.63	0.24	7.12	56.07	102.22	tyrosine kinase-like protein
PF3D7_1125000	PF3D7_1125000.1	PF3D7_1125000	15.18	14.96	14.85	19.5	34.06	54.49	83.51	120.7	conserved protein, unknown function
PF3D7_1125700	PF3D7_1125700.1	PF3D7_1125700	1132.39	219.04	23.33	5.17	6.4	18.78	16.7	63.89	kelch domain-containing protein, putative
PF3D7_1125800	PF3D7_1125800.1	PF3D7_1125800	3376.06	1093.59	108.73	21.94	9.35	18.52	13.58	74.73	kelch domain-containing protein, putative
PF3D7_1126700	PF3D7_1126700.1	PF3D7_1126700	2132.29	532.04	74.59	21.86	4.82	6.9	14.8	328.8	conserved Plasmodium protein, unknown function
PF3D7_1127500	PF3D7_1127500.1	PF3D7_1127500	37.14	11.28	5.6	4.83	11.37	29.1	64.46	97.39	protein disulfide-isomerase, putative
PF3D7_1128700	PF3D7_1128700.1	PF3D7_1128700	15.48	7.47	3.79	2.66	5.65	18.03	41.11	82.8	GPI-anchor transamidase, putative
PF3D7_1128900	PF3D7_1128900.1	PF3D7_1128900	65.56	12.64	3.41	0.94	1.51	4.05	32.63	170.53	conserved protein, unknown function
PF3D7_1129300	PF3D7_1129300.1	PF3D7_1129300	83.6	16.53	3.92	1.5	0.62	0.63	10.16	92.9	conserved Plasmodium protein, unknown function
PF3D7_1132800	PF3D7_1132800.1	PF3D7_1132800	206.28	37.12	18.61	44.76	132.86	157.42	190.36	491.54	aquaglyceroporin
PF3D7_1133200	PF3D7_1133200.1	PF3D7_1133200	104.75	41.94	13.1	8.78	63.48	294.92	598.63	546.1	conserved Plasmodium protein, unknown function
PF3D7_1133400	PF3D7_1133400.1	PF3D7_1133400	1508.39	417.89	53.39	8.44	2.09	5.83	25.78	103.58	apical membrane antigen 1
PF3D7_1134300	PF3D7_1134300.1	PF3D7_1134300	57.96	30.62	14.41	7.43	10.81	39.96	161.01	234.77	conserved Plasmodium protein, unknown function
PF3D7_1135500	PF3D7_1135500.1	PF3D7_1135500	5.63	6.13	1.57	3.16	14.65	57.46	74.44	44.31	conserved protein, unknown function
PF3D7_1136200	PF3D7_1136200.1	PF3D7_1136200	202.02	44.86	7.77	2.03	1.96	4.91	25.13	257.12	conserved Plasmodium protein, unknown function
PF3D7_1136900	PF3D7_1136900.1	PF3D7_1136900	306.76	142.82	41.28	20.05	8.01	7.38	5.71	27.67	subtilisin-like protease 2
PF3D7_1137200	PF3D7_1137200.1	PF3D7_1137200	95.59	21.95	8.41	3.35	4.09	8.56	16.43	113.08	apical exonemal protein
PF3D7_1138000	PF3D7_1138000.1	PF3D7_1138000	45.94	14.54	4.27	1.83	0.74	1.63	36.35	121.21	conserved Plasmodium protein, unknown function
PF3D7_1138400	PF3D7_1138400.1	PF3D7_1138400	15.43	5.6	1.87	0.9	0.89	4.5	28.49	76.76	guanylyl cyclase alpha
PF3D7_1140400	PF3D7_1140400.1	PF3D7_1140400	197.12	39.43	6.92	1.19	1.72	2.65	30.94	375.69	conserved Plasmodium protein, unknown function
PF3D7_1141300	PF3D7_1141300.1	PF3D7_1141300	34.07	18.63	8.7	5.13	20.15	102.93	242.08	239.37	apical polar ring protein APR1, putative
PF3D7_1143100	PF3D7_1143100.1	PF3D7_1143100	1084.28	271.86	41.87	13.02	5.13	6.3	10.23	85.94	AP2 domain transcription factor AP2-O, putative
PF3D7_1145200	PF3D7_1145200.1	PF3D7_1145200	507.75	130.36	20.21	7.06	3.74	1.92	31.69	373.5	serine/threonine protein kinase, putative
PF3D7_1146600	PF3D7_1146600.1	PF3D7_1146600	399.35	71.88	9.64	5.75	12.62	26.36	33.68	70.62	oocyst rupture protein 1, putative
PF3D7_1147400	PF3D7_1147400.1	PF3D7_1147400	31.89	12.4	2.61	3.02	12.41	57.49	80.03	165.59	conserved Plasmodium protein, unknown function
PF3D7_1204900	PF3D7_1204900.1	PF3D7_1204900	661.23	146.6	22.21	7.95	9.31	8.53	12.88	48.54	conserved Plasmodium protein, unknown function
PF3D7_1206100	PF3D7_1206100.1	PF3D7_1206100	18.81	8.03	5.61	2.27	1.18	1.97	3.05	10	IMP-specific 5'-nucleotidase 1
PF3D7_1206300	PF3D7_1206300.1	PF3D7_1206300	433.48	97.08	16.76	11.2	21.1	31.57	45.57	250.05	conserved Plasmodium protein, unknown function
PF3D7_1207000	PF3D7_1207000.1	PF3D7_1207000	118.62	40.39	12.64	11.25	66.96	147.86	271.78	269.68	conserved Plasmodium protein, unknown function
PF3D7_1209400	PF3D7_1209400.1	PF3D7_1209400	406.7	85.61	11.68	12.18	51.45	51.88	37.29	24.78	cytosolic iron-sulfur protein assembly protein 1, putative
PF3D7_1209600	PF3D7_1209600.1	PF3D7_1209600	30.19	7.51	0.96	1.79	0.43	4.49	3.06	6.46	porphobilinogen deaminase
PF3D7_1211700	PF3D7_1211700.1	PF3D7_1211700	44.43	18.51	7.62	5.11	43.87	175.41	301.79	474.91	DNA replication licensing factor MCM5, putative
PF3D7_1215000	PF3D7_1215000.1	PF3D7_1215000	21.91	13.77	5.89	5.09	10.38	45.58	68.51	96.27	thioredoxin peroxidase 2
PF3D7_1215400	PF3D7_1215400.1	PF3D7_1215400	28.1	14.31	7.78	5.62	15.06	41.24	90.51	134.93	conserved Plasmodium protein, unknown function
PF3D7_1215600	PF3D7_1215600.1	PF3D7_1215600	37.56	15.55	15.98	10.81	37.06	117.12	154.29	147.89	conserved protein, unknown function
PF3D7_1216500	PF3D7_1216500.1	PF3D7_1216500	204.54	288.61	243.57	155.36	79.75	37.69	36.93	55.33	male development gene 1
PF3D7_1218000	PF3D7_1218000.1	PF3D7_1218000	196.41	44.91	6.13	1.97	1.4	1.29	2.94	16.09	thrombospondin-related apical membrane protein
PF3D7_1218100	PF3D7_1218100.1	PF3D7_1218100	76.6	8.52	2.44	0.94	0.45	1.93	5.2	9.55	conserved Plasmodium protein, unknown function
PF3D7_1221300	PF3D7_1221300.1	PF3D7_1221300	48.96	16.66	9.19	4.66	24.84	88	90.76	160.15	conserved Plasmodium protein, unknown function
PF3D7_1221400	PF3D7_1221400.1	PF3D7_1221400	5.74	6.48	5.83	5.5	3.54	4.82	4.07	3.19	inner membrane complex protein 1h, putative
PF3D7_1222700	PF3D7_1222700.1	PF3D7_1222700	1802.26	487.45	59.25	15.41	13.5	39.42	72.91	379.48	glideosome-associated protein 45
PF3D7_1223000	PF3D7_1223000.1	PF3D7_1223000	21.15	3.36	1.73	1.6	3.12	8.08	10.34	17.02	conserved Plasmodium protein, unknown function
PF3D7_1223100	PF3D7_1223100.1	PF3D7_1223100	1418.24	343.82	44.31	10.38	13.61	79.41	304.53	1083.89	cAMP-dependent protein kinase regulatory subunit
PF3D7_1224100	PF3D7_1224100.1	PF3D7_1224100	107.44	24.04	5.04	3.38	10.79	24.24	137.78	384.29	conserved protein, unknown function
PF3D7_1224200	PF3D7_1224200.1	PF3D7_1224200	91.22	13.36	2.99	1.47	3.68	6.52	6.35	10.14	BRO1 domain-containing protein, putative
PF3D7_1227500	PF3D7_1227500.1	PF3D7_1227500	42.95	20.01	8.36	3.85	13.05	80.41	243.9	283.99	protein SOC2, putative
PF3D7_1227600	PF3D7_1227600.1	PF3D7_1227600	43.45	13.77	4.74	6.27	33.51	94.35	143.58	171.14	kinetochore protein SPC24, putative
PF3D7_1228300	PF3D7_1228300.1	PF3D7_1228300	30.32	12.02	4.18	4.11	31.63	95.49	128.83	143.22	NIMA related kinase 1
PF3D7_1228600	PF3D7_1228600.1	PF3D7_1228600	5883	1459.91	271.51	111.9	18.58	36.96	2172.07	11707.9	merozoite surface protein 9
PF3D7_1228700	PF3D7_1228700.1	PF3D7_1228700	15.4	7.11	2.58	1.31	7.68	23.82	53.1	85.61	conserved Plasmodium protein, unknown function
PF3D7_1229600	PF3D7_1229600.1	PF3D7_1229600	43.52	22.79	9.74	9.5	71.44	167.06	248.76	192.11	conserved Plasmodium protein, unknown function
PF3D7_1229800	PF3D7_1229800.1	PF3D7_1229800	209.78	49.34	7.96	1.7	1.59	2.35	3.05	39.18	myosin J, putative
PF3D7_1230100	PF3D7_1230100.1	PF3D7_1230100	21.69	10.56	5.43	5.02	2.94	3.54	3.87	5.62	thioredoxin-like associated protein 1, putative
PF3D7_1230300	PF3D7_1230300.1	PF3D7_1230300	12.66	5.18	1.85	1.5	2.24	3.19	2.96	9.31	subpellicular microtubule protein 2, putative
PF3D7_1231200	PF3D7_1231200.1	PF3D7_1231200	473.45	170.05	29.36	6.02	2.69	4.61	5.47	20.07	conserved Plasmodium protein, unknown function
PF3D7_1231300	PF3D7_1231300.1	PF3D7_1231300	37.63	14.39	5.35	2.36	1.01	0.22	0.61	3.87	conserved Plasmodium protein, unknown function
PF3D7_1232500	PF3D7_1232500.1	PF3D7_1232500	642	187.2	24.87	6.69	2.99	7.19	50.18	177.63	CG2-related protein, putative
PF3D7_1234900	PF3D7_1234900.1	PF3D7_1234900	152.13	47.59	22.7	24.65	82.54	237.92	281.02	430.58	CHCH domain-containing protein, putative
PF3D7_1235100	PF3D7_1235100.1	PF3D7_1235100	8.86	5.7	4.13	1.59	1.79	4.45	11.62	28.15	conserved protein, unknown function
PF3D7_1235200	PF3D7_1235200.1	PF3D7_1235200	30.37	7.61	1.43	0.72	0.29	1.18	13.12	95.59	V-type K+-independent H+-translocating inorganic pyrophosphatase
PF3D7_1235600	PF3D7_1235600.1	PF3D7_1235600	40.6	18.09	12.2	8.47	52.65	258.19	407.08	433.63	serine hydroxymethyltransferase
PF3D7_1235700	PF3D7_1235700.1	PF3D7_1235700	8.75	7.12	4.59	3.64	29.59	93.05	92.76	89.23	ATP synthase subunit beta, mitochondrial
PF3D7_1236900	PF3D7_1236900.1	PF3D7_1236900	66.98	13.67	2.24	2.41	3.56	7.87	14.06	57.2	conserved Plasmodium protein, unknown function
PF3D7_1238600	PF3D7_1238600.1	PF3D7_1238600	55.89	11.94	3.07	1.38	1.96	11.41	44.3	148.27	sphingomyelin phosphodiesterase
PF3D7_1242300	PF3D7_1242300.1	PF3D7_1242300	3.01	3.12	2.6	3.9	27.74	49.59	47.13	40.96	conserved Plasmodium membrane protein, unknown function
PF3D7_1243400	PF3D7_1243400.1	PF3D7_1243400	284.03	55.81	5.66	3.12	24.57	35.32	31.78	31.01	conserved Plasmodium protein, unknown function
PF3D7_1243700	PF3D7_1243700.1	PF3D7_1243700	671.21	168.76	21.39	7.54	9	21.68	26.67	47.3	ubiquitin-conjugating enzyme E2, putative
PF3D7_1243900	PF3D7_1243900.1	PF3D7_1243900	94.19	32.49	11.02	5.25	4.7	9.07	25.88	130.48	double C2-like domain-containing protein
PF3D7_1246200	PF3D7_1246200.1	PF3D7_1246200	3783.88	1042.67	166.06	84.9	275.85	623.06	951	2621.33	actin I
PF3D7_1246400	PF3D7_1246400.1	PF3D7_1246400	1489.65	354.07	50.13	16.84	15.02	18.36	30.19	147.51	myosin A-tail interacting protein
PF3D7_1247700	PF3D7_1247700.1	PF3D7_1247700	145.19	40.37	5.83	2.54	0.77	0.74	5.61	76.51	conserved Plasmodium protein, unknown function
PF3D7_1247800	PF3D7_1247800.1	PF3D7_1247800	48.81	14.69	8.79	5.94	3.45	1.13	2.61	18	dipeptidyl aminopeptidase 2
PF3D7_1251200	PF3D7_1251200.1	PF3D7_1251200	2435.17	533.03	63.52	11.46	2.94	3.31	3.71	151.41	coronin
PF3D7_1251300	PF3D7_1251300.1	PF3D7_1251300	84.79	24.12	9.05	7.18	23.58	63.91	83.61	104.85	thymidylate kinase
PF3D7_1252100	PF3D7_1252100.1	PF3D7_1252100	138.41	27.63	5.75	1.58	1.16	1.04	27.84	226.87	rhoptry neck protein 3
PF3D7_1252400	PF3D7_1252400.1	PF3D7_1252400	161.74	31.81	3.89	0.94	0.39	0.28	0.22	5.54	reticulocyte binding protein homologue 3, pseudogene
PF3D7_1301600	PF3D7_1301600.1	PF3D7_1301600	2051.4	441.33	49.72	8.95	6.08	5.34	1.75	52.78	erythrocyte binding antigen-140
PF3D7_1302100	PF3D7_1302100.1	PF3D7_1302100	209.01	214.48	106.19	51.63	77.18	226.61	469.35	857.48	gamete antigen 27/25
PF3D7_1304000	PF3D7_1304000.1	PF3D7_1304000	21.43	5.13	1.74	1.37	8.37	37.58	63.76	87.07	condensin complex subunit 2, putative
PF3D7_1307500	PF3D7_1307500.1	PF3D7_1307500	684.76	181.88	32.52	13.19	5.3	6.3	5.42	94.4	conserved Plasmodium protein, unknown function
PF3D7_1308000	PF3D7_1308000.1	PF3D7_1308000	418.83	96.31	19.59	9.88	15.99	41.91	109.4	420.13	conserved Plasmodium membrane protein, unknown function
PF3D7_1310200	PF3D7_1310200.1	PF3D7_1310200	107.84	17.91	3.35	2.32	3.58	3.25	5.24	96.28	conserved Plasmodium protein, unknown function
PF3D7_1310700	PF3D7_1310700.1	PF3D7_1310700	4741.76	1235	154.46	37.23	9.27	8.26	7.76	376.14	PhIL1-interacting candidate PIC5
PF3D7_1312500	PF3D7_1312500.1	PF3D7_1312500	197.14	52.34	10.82	3.04	1.3	4.71	8.61	12.89	conserved Plasmodium protein, unknown function
PF3D7_1312600	PF3D7_1312600.1	PF3D7_1312600	42.62	16.08	6.61	3.34	7.08	43.17	87.69	113.61	2-oxoisovalerate dehydrogenase subunit alpha, mitochondrial, putative
PF3D7_1312800	PF3D7_1312800.1	PF3D7_1312800	310.17	91.63	17.72	9.53	22.88	64.76	129.15	204.45	protein AAP2
PF3D7_1313500	PF3D7_1313500.1	PF3D7_1313500	33.58	7.29	2.32	0.63	0.63	1.09	6.15	47.28	conserved Plasmodium membrane protein, unknown function
PF3D7_1317100	PF3D7_1317100.1	PF3D7_1317100	38.34	14.65	5.73	6.96	62.01	216.24	304.33	355.18	DNA replication licensing factor MCM4
PF3D7_1318600	PF3D7_1318600.1	PF3D7_1318600	8.28	6.13	3.47	2.92	5.28	14.68	19.58	25.03	thioredoxin, putative
PF3D7_1319400	PF3D7_1319400.1	PF3D7_1319400	90.75	48.46	28.81	20.93	77.45	259.08	478.65	513.83	conserved protein, unknown function
PF3D7_1320700	PF3D7_1320700.1	PF3D7_1320700	87.89	27.94	7.91	5	10.48	35.39	73.91	207.68	conserved protein, unknown function
PF3D7_1321100	PF3D7_1321100.1	PF3D7_1321100	116.09	24.6	4.01	1.66	0.8	2.43	12.85	114.93	protein kinase domain-containing protein, putative
PF3D7_1322000	PF3D7_1322000.1	PF3D7_1322000	83.86	12.73	3.49	1.75	15.26	53.21	107.14	123.36	nucleoside-diphosphatase, putative
PF3D7_1322500	PF3D7_1322500.1	PF3D7_1322500	60.64	21.32	6.48	3.93	4.08	23.71	82.23	212.38	palmitoyltransferase DHHC5
PF3D7_1322600	PF3D7_1322600.1	PF3D7_1322600	15.87	3.42	0.63	0.12	0.84	2.7	9.68	50.27	conserved Plasmodium protein, unknown function
PF3D7_1323700	PF3D7_1323700.1	PF3D7_1323700	311.65	74.56	20.61	5.75	3.05	9.1	68.31	552.33	glideosome associated protein with multiple membrane spans 1
PF3D7_1324600	PF3D7_1324600.1	PF3D7_1324600	4.15	4.48	3.57	3.17	18.29	36.77	45.25	29.17	conserved Plasmodium protein, unknown function
PF3D7_1325400	PF3D7_1325400.1	PF3D7_1325400	68.67	23.15	7.57	3.9	5.44	32.25	134.9	224.94	CRWN-like protein, putative
PF3D7_1325900	PF3D7_1325900.1	PF3D7_1325900	15.16	7.63	3.56	2.62	5.62	29.21	86.98	95.41	conserved Plasmodium protein, unknown function
PF3D7_1327300	PF3D7_1327300.1	PF3D7_1327300	2636.03	878.23	192.4	145	191.47	127.47	95.97	174.02	conserved Plasmodium protein, unknown function
PF3D7_1331300	PF3D7_1331300.1	PF3D7_1331300	30.47	9.28	1.62	2.63	17.52	63	109.89	181.34	signal peptidase complex catalytic subunit SEC11
PF3D7_1331600	PF3D7_1331600.1	PF3D7_1331600	117.46	29.1	7.01	6.27	18.6	88.22	214.97	285.09	3-hydroxyacyl-CoA dehydratase DEH
PF3D7_1332200	PF3D7_1332200.1	PF3D7_1332200	578.85	136.61	23.65	8.52	4.64	4.9	5.81	149.67	conserved protein, unknown function
PF3D7_1334600	PF3D7_1334600.1	PF3D7_1334600	11.3	8.03	2.44	0.57	1.48	11.33	64.43	144.86	MSP7-like protein
PF3D7_1335100	PF3D7_1335100.1	PF3D7_1335100	1488.33	324.56	54.8	13.74	4.29	9.14	197.91	915.82	merozoite surface protein 7
PF3D7_1335300	PF3D7_1335300.1	PF3D7_1335300	455.01	126.18	15.36	4.64	2.44	3.21	4.05	30.18	reticulocyte binding protein 2 homologue b
PF3D7_1335400	PF3D7_1335400.1	PF3D7_1335400	1321.83	329.12	40.02	11.35	8.2	7.45	5.49	57.05	reticulocyte binding protein 2 homologue a
PF3D7_1336600	PF3D7_1336600.1	PF3D7_1336600	0	0	0	0	0	0	0	0	conserved protein, unknown function
PF3D7_1337700	PF3D7_1337700.1	PF3D7_1337700	85.2	20.04	4.48	1.2	2.07	1.89	10.32	102.25	phosphoinositide-binding protein PH2
PF3D7_1337800	PF3D7_1337800.1	PF3D7_1337800	520.46	120.54	17.92	7.52	2.75	1.75	1.52	15.27	calcium-dependent protein kinase 5
PF3D7_1338400	PF3D7_1338400.1	PF3D7_1338400	9.65	10.29	6.57	6.61	6.81	18.73	19.8	16.47	SprT-like domain-containing protein, putative
PF3D7_1338600	PF3D7_1338600.1	PF3D7_1338600	111.57	30.06	8.47	6.51	49.83	111.85	147.09	141.99	conserved protein, unknown function
PF3D7_1340700	PF3D7_1340700.1	PF3D7_1340700	13.01	14.26	7.55	6.36	15.5	43.42	65.65	115.66	ras-related protein Rab-11B
PF3D7_1341500	PF3D7_1341500.1	PF3D7_1341500	43.11	10.67	2.52	0.7	0.47	0.76	2.13	21.96	inner membrane complex suture component, putative
PF3D7_1341800	PF3D7_1341800.1	PF3D7_1341800	22.72	6.07	2.47	1.49	1.12	1.39	3.46	9.59	inner membrane complex protein 1k, putative
PF3D7_1342500	PF3D7_1342500.1	PF3D7_1342500	44.54	13.48	5.33	2.14	2.91	8.73	9.62	6.19	sporozoite protein essential for cell traversal
PF3D7_1342600	PF3D7_1342600.1	PF3D7_1342600	3267.97	760.31	90.39	24.54	23.52	24.39	16.43	126.43	myosin A
PF3D7_1343100	PF3D7_1343100.1	PF3D7_1343100	90.04	19.74	6.05	3.61	5.08	29.18	90.86	209.06	conserved Plasmodium protein, unknown function
PF3D7_1344300	PF3D7_1344300.1	PF3D7_1344300	256.4	57.43	12.74	9.81	7.05	6.32	12.23	67.28	zinc finger protein, putative
PF3D7_1344600	PF3D7_1344600.1	PF3D7_1344600	128.39	100.94	123.61	76.74	44.84	78.95	111.8	122.24	lipoyl synthase
PF3D7_1345600	PF3D7_1345600.1	PF3D7_1345600	100.15	26.81	8.62	4.43	3.3	7.02	12.49	122.4	inner membrane complex protein
PF3D7_1347000	PF3D7_1347000.1	PF3D7_1347000	4.45	3.54	2.85	0.72	1.93	4.25	6.63	10.78	WD repeat-containing protein 92, putative
PF3D7_1348500	PF3D7_1348500.1	PF3D7_1348500	25.53	7.81	5.26	2.31	20.09	68.39	91.43	101.12	TBC domain protein, putative
PF3D7_1348600	PF3D7_1348600.1	PF3D7_1348600	168.11	34.22	7.64	3.46	1.77	1.03	8.77	121.03	conserved Plasmodium protein, unknown function
PF3D7_1349100	PF3D7_1349100.1	PF3D7_1349100	16.24	5.08	4.96	2.18	4.08	7.21	26.17	59.86	nucleoside diphosphate hydrolase, putative
PF3D7_1350800	PF3D7_1350800.1	PF3D7_1350800	14.76	7.82	10.32	7.79	9.68	16.82	24.24	24.86	conserved Plasmodium protein, unknown function
PF3D7_1351600	PF3D7_1351600.1	PF3D7_1351600	104.86	25.49	7.1	8.35	8.26	9.19	5.9	10.71	glycerol kinase
PF3D7_1351700	PF3D7_1351700.1	PF3D7_1351700	1049.15	279.28	36.1	8.45	4.52	3.69	5.42	64.42	inner membrane complex protein 1f, putative
PF3D7_1352900	PF3D7_1352900.1	PF3D7_1352900	790.25	609.94	362.28	48.2	6.5	1.95	0.95	2.63	Plasmodium exported protein, unknown function
PF3D7_1356100	PF3D7_1356100.1	PF3D7_1356100	101.41	34.69	10.79	4.93	8.13	48.72	141.03	258.54	conserved Plasmodium protein, unknown function
PF3D7_1356300	PF3D7_1356300.1	PF3D7_1356300	118.28	29.98	8.49	7.42	40.01	68.97	96.5	243.31	ubiquitin-conjugating enzyme E2, putative
PF3D7_1356800	PF3D7_1356800.1	PF3D7_1356800	322.77	73.2	14.51	4.68	4.5	5.23	10.61	86.19	serine/threonine protein kinase ARK3, putative
PF3D7_1358600	PF3D7_1358600.1	PF3D7_1358600	37.85	21.75	13.61	13.3	7.9	4.37	3.84	9.88	zinc finger protein, putative
PF3D7_1361400	PF3D7_1361400.1	PF3D7_1361400	202.77	34.51	4.39	3.13	4.27	10.19	12.26	70.62	actin-depolymerizing factor 2
PF3D7_1361700	PF3D7_1361700.1	PF3D7_1361700	30.77	8.7	2.74	2	11.91	48.24	83.31	132.79	cytochrome c oxidase subunit 2A, putative
PF3D7_1361800	PF3D7_1361800.1	PF3D7_1361800	405.11	111.4	18.5	5.39	1.07	1.9	38.73	235.68	glideosome-associated connector
PF3D7_1361900	PF3D7_1361900.1	PF3D7_1361900	33.57	15.41	6.09	9.92	159.76	509.22	553.17	477.62	proliferating cell nuclear antigen 1
PF3D7_1362700	PF3D7_1362700.1	PF3D7_1362700	86.8	94.42	48.46	36.44	62.73	164.84	183.31	118.22	conserved Plasmodium protein, unknown function
PF3D7_1371600	PF3D7_1371600.1	PF3D7_1371600	108.7	26.6	3.17	0.65	0.52	1.26	2.37	20.89	erythrocyte binding like protein 1, pseudogene
PF3D7_1372400	PF3D7_1372400.1	PF3D7_1372400	2.44	1.51	0.82	0.51	1.35	10.59	26.7	29.33	acyl-CoA synthetase
PF3D7_1401100	PF3D7_1401100.1	PF3D7_1401100	1123.72	1343.93	1041.59	223.05	106.76	31.89	5.72	5.8	DnaJ protein, putative
PF3D7_1401900	PF3D7_1401900.1	PF3D7_1401900	136.57	47.86	16.44	13.68	16.45	14.77	10.31	22.96	conserved protein, unknown function
PF3D7_1402200	PF3D7_1402200.1	PF3D7_1402200	155.04	47.75	17.04	11.95	32.42	103.01	138.7	252.55	cytochrome c oxidase subunit ApiCOX19, putative
PF3D7_1403100	PF3D7_1403100.1	PF3D7_1403100	29.51	13.31	6.04	6.39	34.98	85.38	122.34	138.18	condensin complex subunit 1, putative
PF3D7_1403600	PF3D7_1403600.1	PF3D7_1403600	63.91	21.65	8.45	9.88	37.91	48.33	77.78	107.18	selenoprotein
PF3D7_1403700	PF3D7_1403700.1	PF3D7_1403700	4.41	4.25	3.24	1.73	8.64	18.72	19.65	16.47	translocation associated membrane protein, putative
PF3D7_1404400	PF3D7_1404400.1	PF3D7_1404400	9.85	4.99	1.92	5.14	18.77	41.09	54.52	45.97	ribosomal protein L16, mitochondrial, putative
PF3D7_1405600	PF3D7_1405600.1	PF3D7_1405600	36.03	19.59	12.6	17.17	169.22	518.96	507.43	465.09	ribonucleoside-diphosphate reductase small chain, putative
PF3D7_1406800	PF3D7_1406800.1	PF3D7_1406800	251.93	63.8	15.14	7.61	11.96	38.37	109.84	577.52	glideosome associated protein with multiple membrane spans 3
PF3D7_1409400	PF3D7_1409400.1	PF3D7_1409400	252.4	76.6	17.03	9.67	10.97	24.31	53.63	233.83	conserved protein, unknown function
PF3D7_1410400	PF3D7_1410400.1	PF3D7_1410400	1213.08	262.25	42.92	6.95	1.1	2.3	109.29	1559.63	rhoptry-associated protein 1
PF3D7_1410800	PF3D7_1410800.1	PF3D7_1410800	57.61	13.99	4.94	3.63	2.27	6.39	13.88	89.65	ankyrin-repeat protein, putative
PF3D7_1413500	PF3D7_1413500.1	PF3D7_1413500	13.82	4.44	0.47	1.16	14.04	53.96	83.77	80.62	iron-sulfur cluster assembly protein SufC
PF3D7_1413700	PF3D7_1413700.1	PF3D7_1413700	653.05	131.64	15.39	5.37	5.27	14.22	13.99	47.78	conserved Plasmodium protein, unknown function
PF3D7_1417300	PF3D7_1417300.1	PF3D7_1417300	45.42	11.55	2.64	1.42	0.96	4.19	19.3	61.2	cysteine protease ATG4, putative
PF3D7_1417400	PF3D7_1417400.1	PF3D7_1417400	140.89	34.44	9.08	4.12	1.66	2.4	5.62	42.88	rap guanine nucleotide exchange factor, putative, pseudogene
PF3D7_1417800	PF3D7_1417800.1	PF3D7_1417800	34.88	17.58	7.76	9.41	84.1	239.2	365.79	395.23	DNA replication licensing factor MCM2
PF3D7_1421900	PF3D7_1421900.1	PF3D7_1421900	55.31	15.04	5.5	3.39	32.75	72.71	152.9	355.07	copper transporter, putative
PF3D7_1422600	PF3D7_1422600.1	PF3D7_1422600	11.79	5.62	2.89	3.31	8.9	23	36.62	51.23	conserved Plasmodium protein, unknown function
PF3D7_1423100	PF3D7_1423100.1	PF3D7_1423100	98.67	19.74	5.61	1.61	2.38	3.74	4.09	24.64	ankyrin-repeat protein, putative
PF3D7_1423300	PF3D7_1423300.1	PF3D7_1423300	396.57	103.15	15.67	7.09	4.93	3.56	5.72	117.2	serine/threonine protein phosphatase 7
PF3D7_1425300	PF3D7_1425300.1	PF3D7_1425300	524.2	115.9	24.91	19.31	98.89	243.27	345.02	344.79	conserved Plasmodium protein, unknown function
PF3D7_1426300	PF3D7_1426300.1	PF3D7_1426300	13.51	20.65	26.74	43.98	41.21	48.98	51.81	54.74	dynein intermediate chain, putative
PF3D7_1426900	PF3D7_1426900.1	PF3D7_1426900	53.02	20.81	12.3	11.38	56.9	129.3	195.98	304.93	cytochrome b-c1 complex subunit 6, putative
PF3D7_1427200	PF3D7_1427200.1	PF3D7_1427200	41.6	38.54	26.61	11.29	7.54	18.16	67.53	127.49	selenoprotein
PF3D7_1430200	PF3D7_1430200.1	PF3D7_1430200	134.59	39.26	16.28	7.37	3.84	10.22	14.89	130.93	plasmepsin IX
PF3D7_1430700	PF3D7_1430700.1	PF3D7_1430700	3.73	1.95	2.01	1.36	13.14	61.11	60.57	52.97	NADP-specific glutamate dehydrogenase
PF3D7_1430800	PF3D7_1430800.1	PF3D7_1430800	8.53	17.71	15.77	8.61	5.92	3.95	4.69	4.79	PhIL1 interacting protein PIP3
PF3D7_1430900	PF3D7_1430900.1	PF3D7_1430900	26.43	15.78	9.12	4.38	15.59	71.05	108.6	169.99	cytochrome c oxidase subunit 2B, putative
PF3D7_1431000	PF3D7_1431000.1	PF3D7_1431000	6.95	4.66	3.09	1	14.37	53.92	49.89	32.29	ribosomal protein L17, mitochondrial, putative
PF3D7_1431100	PF3D7_1431100.1	PF3D7_1431100	23.84	39.13	26.02	17.69	9.37	6.69	5.32	5.52	PhIL1 interacting protein PIP2
PF3D7_1431400	PF3D7_1431400.1	PF3D7_1431400	193.15	39.08	6.92	2.52	0.79	0.61	17.87	203.34	surface-related antigen SRA
PF3D7_1432200	PF3D7_1432200.1	PF3D7_1432200	44.22	12.03	4.1	3.06	3.25	4.59	21.98	95.02	conserved Plasmodium protein, unknown function
PF3D7_1432700	PF3D7_1432700.1	PF3D7_1432700	7.74	5.65	5.1	5.24	22.98	87.3	124.45	120.63	protein-L-isoaspartate(D-aspartate) O-methyltransferase, putative
PF3D7_1434400	PF3D7_1434400.1	PF3D7_1434400	177.48	38.17	5.41	4.74	2.72	4.92	9.35	69.35	conserved protein, unknown function
PF3D7_1435000	PF3D7_1435000.1	PF3D7_1435000	7.71	2.8	1.73	2.66	17.99	58.54	66.62	59.57	cytochrome c oxidase assembly protein COX15, putative
PF3D7_1435200	PF3D7_1435200.1	PF3D7_1435200	59.35	12.17	7.16	3.37	3.7	5.55	10.8	22.62	conserved protein, unknown function
PF3D7_1435300	PF3D7_1435300.1	PF3D7_1435300	69.69	18.95	4.75	1.89	5.71	14.53	34.98	46.75	glutamate synthase [NADH], putative
PF3D7_1435600	PF3D7_1435600.1	PF3D7_1435600	411.23	98.89	20.62	5.91	2.6	5.28	14.04	126.67	conserved Plasmodium protein, unknown function
PF3D7_1436200	PF3D7_1436200.1	PF3D7_1436200	213.82	45.78	9.7	3.33	2.74	3.89	15.64	158.4	basal complex protein BCP1
PF3D7_1436600	PF3D7_1436600.1	PF3D7_1436600	207.64	50.42	7.41	2.59	4.71	14.27	58.01	182.51	cGMP-dependent protein kinase
PF3D7_1437700	PF3D7_1437700.1	PF3D7_1437700	10.29	5.32	3.31	1.76	5.61	22.62	47.94	57.9	succinyl-CoA ligase, putative
PF3D7_1438700	PF3D7_1438700.1	PF3D7_1438700	10.8	5.85	3.71	3.76	28.42	129.55	168.72	159.22	DNA primase small subunit
PF3D7_1439400	PF3D7_1439400.1	PF3D7_1439400	36.9	17.97	5.52	4.33	12.5	52.94	97.11	179.86	cytochrome b-c1 complex subunit Rieske, putative
PF3D7_1439500	PF3D7_1439500.1	PF3D7_1439500	161.88	97.79	43.04	10.52	2.94	10.55	26.71	58.85	oocyst rupture protein 2, putative
PF3D7_1440100	PF3D7_1440100.1	PF3D7_1440100	43.5	9.56	2.59	2.08	25.53	79.97	144.13	211.57	cohesin complex subunit, putative
PF3D7_1440400	PF3D7_1440400.1	PF3D7_1440400	21.2	4.84	1.58	0.68	1.18	1.56	18.11	83.8	zinc finger protein, putative
PF3D7_1443000	PF3D7_1443000.1	PF3D7_1443000	20.63	5.39	1.37	1.22	5.61	14.08	23.82	38.81	serine/threonine protein kinase
PF3D7_1443700	PF3D7_1443700.1	PF3D7_1443700	16.6	4.54	1.8	1.67	21.15	46.79	64.25	98.53	dephospho-CoA kinase, putative
PF3D7_1444200	PF3D7_1444200.1	PF3D7_1444200	19.88	5.52	1.74	2.22	0.81	1.88	7.92	22.95	calmodulin-like protein
PF3D7_1446600	PF3D7_1446600.1	PF3D7_1446600	129.8	30.94	11.64	5.99	19.67	83.51	162.16	328.9	centrin-2
PF3D7_1449000	PF3D7_1449000.1	PF3D7_1449000	20.33	7.01	4.17	3.16	1.69	0	1.36	4.07	gamete egress and sporozoite traversal protein, putative
PF3D7_1449100	PF3D7_1449100.1	PF3D7_1449100	54.14	17.31	6.43	2.03	2.9	16.17	48.14	127.08	CLASP domain-containing protein, putative
PF3D7_1449200	PF3D7_1449200.1	PF3D7_1449200	1134.65	294.51	48.7	12.22	3.06	5.6	245.9	2857.59	conserved Plasmodium protein, unknown function
PF3D7_1449400	PF3D7_1449400.1	PF3D7_1449400	27.56	7.58	2.16	5.02	37.15	85.72	102.56	98.55	crossover junction endonuclease MUS81, putative
PF3D7_1451700	PF3D7_1451700.1	PF3D7_1451700	47.64	9.58	2.62	1.06	1.34	17.96	46.95	144.63	calcineurin subunit B
PF3D7_1452000	PF3D7_1452000.1	PF3D7_1452000	138.98	28.71	5.55	1.82	0.99	0.59	11.68	133.57	rhoptry neck protein 2
PF3D7_1455300	PF3D7_1455300.1	PF3D7_1455300	591.61	172.1	32.11	16.39	16.06	10.51	8.98	46.98	conserved protein, unknown function
PF3D7_1455600	PF3D7_1455600.1	PF3D7_1455600	12.89	3.42	0.58	0.49	1.33	6.95	7.58	34.05	ferlin, putative
PF3D7_1456000	PF3D7_1456000.1	PF3D7_1456000	29.05	14.56	5.05	3.48	36.67	114.7	199.77	198.66	AP2 domain transcription factor, putative
PF3D7_1459700	PF3D7_1459700.1	PF3D7_1459700	7.7	8.96	7.02	7.22	28.59	77.53	67.28	38.61	pyridoxal 5'-phosphate synthase, putative
PF3D7_1460600	PF3D7_1460600.1	PF3D7_1460600	235.04	76.7	44.72	42.02	63.43	34.49	47.89	97.05	inner membrane complex sub-compartment protein 3
PF3D7_1461400	PF3D7_1461400.1	PF3D7_1461400	476.55	113.22	28.37	14.82	11.62	17.83	40.83	181.08	MORN repeat protein, putative
PF3D7_1462700	PF3D7_1462700.1	PF3D7_1462700	21.83	17.15	11.24	7.03	42.52	134.67	192.71	223.2	cytochrome c1, heme protein, mitochondrial, putative
PF3D7_1463900	PF3D7_1463900.1	PF3D7_1463900	250.93	47.41	10.04	3.79	1.46	2.05	21.02	271.4	rhoptry neck protein 11, putative
PF3D7_1465000	PF3D7_1465000.1	PF3D7_1465000	46.85	10.29	5.03	2.89	13.68	65.79	107.1	161.43	cytochrome c oxidase subunit ApiCOX25, putative
PF3D7_1468400	PF3D7_1468400.1	PF3D7_1468400	357.98	86.57	13.05	5.48	7.44	9.18	4.64	59.75	zinc finger protein, putative
PF3D7_1469200	PF3D7_1469200.1	PF3D7_1469200	155.06	35.23	6.36	1.96	2.37	8.88	17.19	58.36	shewanella-like protein phosphatase 1, putative
PF3D7_1469900	PF3D7_1469900.1	PF3D7_1469900	181.2	58.88	31.46	34.16	72.65	134.42	205.7	182.74	protein MGET
PF3D7_1471500	PF3D7_1471500.1	PF3D7_1471500	20.75	9.32	1.28	2.36	3.96	6.05	13.27	44.77	transmembrane protein 43, putative
PF3D7_1472600	PF3D7_1472600.1	PF3D7_1472600	100.98	21.18	5.72	1.76	5.2	7.94	17.62	74.83	protein disulfide-isomerase
PF3D7_1472700	PF3D7_1472700.1	PF3D7_1472700	51.64	10.07	2.93	2.51	18.74	30	33.71	30.74	DNA-directed RNA polymerase, alpha subunit, putative
PF3D7_1473400	PF3D7_1473400.1	PF3D7_1473400	191.42	46.94	11.05	4.79	3.22	4.89	5.07	15.76	conserved protein, unknown function
PF3D7_1474000	PF3D7_1474000.1	PF3D7_1474000	23.88	28.61	14.22	8.33	4.15	6.76	7.39	9.01	conserved Plasmodium protein, unknown function
PF3D7_1475800	PF3D7_1475800.1	PF3D7_1475800	16.01	4.45	2.74	0.56	1.13	2.63	2.8	8.37	conserved Plasmodium protein, unknown function
