# Supplementary material for: A coordinated transcriptional switching network mediates antigenic variation of human malaria parasites
Source: eLife. 2022 Dec 14;11:e83840. doi: 10.7554/eLife.83840 (PMC9833823; doi:10.7554/eLife.83840)
Supplement: Supplementary file 8. — Transcription levels (FPKM) are shown for each gene through eight time points of the Plasmodium falciparum (3D7) asexual cycle. [file elife-83840-supp8.xlsx]

## Sheet: TableS6
Supplementary File 8: RNAseq dataset from Bartfai et al. used as the reference for estimating the replication cycle time point of each sample population using the the method of Poran et al.. Transcription levels (FPKM) are shown for each gene through 8 timepoints of the Plasmodium falciparum (3D7) asexual cycle.
	time point 40 to 5hr	time point 2 to 10 hr	time point 7 15 hr	time point 12 to 20 hr	time point 17 to 25 hr	time point 22 to 30 hr	time point 27 to 35 hr	time poibt 32 to 40 hr
PF3D7_1475800	49.1951	32.1793	20.7461	15.6136	9.02718	13.5537	11.5977	15.2155
PF3D7_1475700	23.2127	31.6254	46.3476	43.0327	34.9836	20.5989	14.7481	11.5112
PF3D7_1475600	81.7552	86.3251	85.8231	83.5382	79.678	74.987	65.4665	57.7982
PF3D7_1475500	5.53921	9.37338	7.70296	8.5425	8.0232	5.97196	6.61243	5.05453
PF3D7_1475400	5.41804	5.59114	6.64705	5.88541	6.00658	5.8681	5.60845	4.86412
PF3D7_1475300	27.8691	22.8146	26.6488	40.6439	55.0459	62.3507	62.4719	50.8222
PF3D7_1475200	16.7561	14.9212	12.8267	16.6696	30.8118	35.4163	38.7918	39.2591
PF3D7_1475100	16.8253	45.9754	60.0485	63.1816	61.918	53.8342	50.026	44.3137
PF3D7_1475000	11.9785	36.403	57.7635	59.91	50.6664	38.3936	33.4603	35.0182
PF3D7_1474900	42.046	42.6346	34.4556	36.5415	52.7956	64.9818	68.5996	68.6169
PF3D7_1474800	69.8806	84.1094	88.4542	89.8736	90.4795	92.2278	93.3356	93.7857
PF3D7_1474700	19.5344	37.5974	43.7944	51.1684	37.7532	37.1646	38.6187	36.2645
PF3D7_1474600	91.5008	90.6353	90.2198	88.835	85.7539	84.9922	87.6406	88.108
PF3D7_1474500	63.649	67.0417	68.565	71.1096	67.6822	65.4838	57.4	57.4693
PF3D7_1474400	25.3592	26.8305	27.0556	31.3485	24.8399	23.1608	25.2726	25.5842
PF3D7_1474300	13.7961	13.1729	31.0023	35.5029	41.9595	41.9941	39.9688	30.1714
PF3D7_1474200	9.48589	8.06647	7.51255	9.8494	14.7308	16.6349	18.0544	14.2635
PF3D7_1474100	32.4217	34.7585	15.1895	12.87	50.8222	77.3239	81.8937	71.8366
PF3D7_1474000	48.52	53.1764	49.4028	43.0154	24.6495	21.7068	23.4551	26.6055
PF3D7_1473900	54.3015	73.8446	79.7473	75.9391	66.7994	50.528	31.1234	27.3671
PF3D7_1473600	34.6027	52.7263	41.6479	46.4601	75.6967	91.3277	89.3024	57.0019
PF3D7_1473500	37.2512	65.7954	73.0656	69.0151	67.1975	59.2003	49.5759	37.9436
PF3D7_1473400	83.4343	61.4506	47.2737	28.7	14.627	17.8899	19.2834	18.3573
PF3D7_1473300	9.78016	17.6908	24.1129	36.0827	21.0836	18.037	20.3047	17.0504
PF3D7_1473200	85.9789	95.9668	95.7937	96.2437	96.2091	96.1399	96.1745	96.0187
PF3D7_1473100	36.8357	59.4772	63.0085	64.1509	63.5451	57.7289	57.4347	58.6983
PF3D7_1473000	2.6744	2.71767	10.4899	9.45127	9.78016	8.95794	2.80422	2.38878
PF3D7_1472900	36.0568	59.5292	60.4985	61.2948	54.6651	55.8941	47.8449	48.6412
PF3D7_1472800	52.3282	54.3881	57.452	52.0859	38.4456	52.4667	79.9377	75.0216
PF3D7_1472700	68.7035	45.6119	31.2446	26.1381	37.857	46.062	46.0447	45.8023
PF3D7_1472600	83.4516	56.4826	44.2531	30.6907	26.5016	28.3192	29.6694	49.5413
PF3D7_1472500	56.2749	39.7784	31.963	31.2446	17.6908	18.4352	13.6576	21.4644
PF3D7_1472400	64.3414	61.866	64.7568	64.2029	64.878	58.4559	51.9647	48.243
PF3D7_1472300	82.9842	71.9231	70.7807	69.0843	67.7687	59.3388	59.3734	72.2347
PF3D7_1472200	92.4701	96.0187	95.8629	93.7165	90.5833	87.7445	84.2825	77.8778
PF3D7_1472100	71.525	75.5756	75.5929	73.1002	73.5157	63.4585	60.7409	72.5463
PF3D7_1472000	57.5212	78.5702	74.9524	79.4357	72.6848	72.0789	59.9792	55.167
PF3D7_1471900	27.5576	60.2389	61.7449	60.1869	50.7357	45.0061	40.592	32.7159
PF3D7_1471800	24.6841	40.1766	42.2191	38.0301	27.1767	29.0981	21.2567	16.808
PF3D7_1471700	13.2422	18.9199	30.2406	23.9051	16.6003	11.9958	15.6136	13.3287
PF3D7_1471600	10.0571	20.4258	18.6602	22.6242	16.0118	12.0651	12.8787	11.5977
PF3D7_1471500	24.4071	30.3185	14.8866	16.5138	6.26623	12.2901	7.30483	11.892
PF3D7_1471400	75.8352	47.1352	41.7172	40.9036	43.6905	42.5134	53.2976	74.6581
PF3D7_1471300	59.7196	34.3431	25.7919	24.0609	50.9434	63.6316	70.019	56.3268
PF3D7_1471200	71.9231	63.7701	71.1269	78.9164	85.9962	88.9043	92.2105	94.0627
PF3D7_1471100	98.4075	97.1438	96.4168	96.7976	99.1345	99.221	98.9787	96.763
PF3D7_1471000	54.0938	66.3666	69.2574	69.4478	71.6116	64.376	44.4694	26.519
PF3D7_1470900	71.9578	66.5051	74.1734	83.3651	87.9349	89.2159	91.8816	94.582
PF3D7_1470800	38.861	29.9636	23.0223	37.2512	42.0807	44.781	56.1018	73.256
PF3D7_1470700	34.6806	40.3324	55.721	65.1376	73.6195	70.0883	59.1657	47.6545
PF3D7_1470600	31.1234	55.9806	63.6316	68.0457	73.9311	74.1215	62.4026	44.1752
PF3D7_1470500	40.4881	33.7719	40.315	34.3085	19.2661	20.6855	34.5854	38.4975
PF3D7_1470400	61.0698	45.7158	46.3476	40.5401	20.7288	30.7945	67.786	84.369
PF3D7_1470300	51.7397	72.9098	78.3971	76.1814	66.1416	51.255	36.9569	28.2673
PF3D7_1470200	59.7023	76.2506	72.9791	73.3599	68.1496	66.7215	42.9115	29.5828
PF3D7_1470100	16.7907	17.4312	41.5614	49.9221	49.7663	46.3736	42.5134	36.7146
PF3D7_1470000	31.3138	15.0597	31.5562	46.7544	60.8015	70.1229	72.8925	69.7248
PF3D7_1469900	76.718	52.6571	48.6931	37.6493	26.4324	26.7959	49.8356	52.4667
PF3D7_1469800	82.7419	56.9846	53.9553	55.3228	76.0949	79.4703	76.1122	77.2373
PF3D7_1469700	33.5122	25.238	26.6747	24.1821	47.7757	53.1418	58.8714	58.681
PF3D7_1469600	16.0118	15.2155	15.4752	20.5037	26.519	26.5016	27.2287	27.8345
PF3D7_1469500	13.2075	36.126	47.3775	45.6292	32.941	25.3765	22.555	14.5577
PF3D7_1469400	41.3536	45.7331	58.4386	69.6382	78.9856	74.9524	74.5196	66.8859
PF3D7_1469300	64.324	75.6448	78.7087	79.1934	80.3358	73.5157	67.8207	48.1392
PF3D7_1469200	86.0308	59.685	37.0608	27.9384	20.2873	24.788	28.8731	41.9768
PF3D7_1469100	46.4428	68.8246	75.3505	72.304	68.34	63.9259	65.1895	61.7968
PF3D7_1469000	42.7038	40.9555	54.1458	60.8793	61.0351	57.902	65.6396	73.8272
PF3D7_1468900	25.6708	62.0218	69.8806	71.2654	71.7327	66.5051	56.8634	37.4589
PF3D7_1468800	61.2255	78.8991	81.7899	85.8577	85.7712	83.6247	78.2413	77.4104
PF3D7_1468700	97.5766	98.9268	98.7883	98.5806	98.8229	98.8229	98.5633	97.9574
PF3D7_1468600	9.27817	7.35676	9.03583	2.89077	8.04916	17.8293	21.1182	15.7521
PF3D7_1468500	68.34	56.2056	61.0351	61.5891	61.3294	68.8593	83.9017	91.7604
PF3D7_1468400	90.7218	67.1975	50.7184	35.0355	27.7999	27.6614	20.9105	26.2593
PF3D7_1468300	16.7215	16.9984	28.0422	31.5908	28.1807	18.5044	13.0864	17.9332
PF3D7_1468200	72.529	63.0085	67.7514	67.3187	75.1947	79.0722	59.8061	68.0284
PF3D7_1468100	87.3983	88.4888	91.7604	94.2011	93.3183	92.0201	89.9429	93.9761
PF3D7_1468000	22.5203	14.5318	15.7175	13.0604	20.6682	25.0476	25.4457	19.4911
PF3D7_1467900	91.5181	77.0296	70.3999	67.2494	70.8153	69.569	71.0576	76.5449
PF3D7_1467800	33.8497	35.8144	53.6091	58.7502	53.938	61.9699	67.6649	73.5503
PF3D7_1467700	21.1009	48.5373	61.139	62.2988	49.2643	36.8011	40.2804	49.0047
PF3D7_1467600	54.8035	69.5171	79.4876	90.618	90.9295	87.7272	82.4649	69.1708
PF3D7_1467500	47.2044	66.6263	69.569	70.0537	67.336	64.8953	67.9938	68.2188
PF3D7_1467400	38.1686	40.6786	53.1245	51.3415	47.6718	43.6299	51.255	62.1603
PF3D7_1467300	36.403	33.3737	33.5295	31.5735	35.7625	49.3682	67.3879	67.7168
PF3D7_1467200	28.2673	67.3879	70.2614	64.6702	58.3867	52.1551	35.2259	23.8532
PF3D7_1467100	24.3725	55.9979	61.2082	59.0358	54.0592	45.4907	41.6133	36.3684
PF3D7_1467000	9.44262	9.97057	10.611	13.3633	8.6377	10.7149	6.68167	8.93197
PF3D7_1466900	50.476	61.3467	63.8394	62.9392	61.7968	50.3375	39.0341	42.6173
PF3D7_1466800	73.983	78.951	75.6275	74.26	67.8726	61.2775	43.1193	35.7798
PF3D7_1466700	47.6545	68.0717	67.9765	69.2055	69.6555	57.928	44.5041	30.1367
PF3D7_1466600	29.5136	57.7289	60.2043	60.4466	57.6251	36.1606	22.1395	12.9825
PF3D7_1466500	40.2804	49.7317	51.6358	45.2657	24.0782	21.5769	20.798	14.2894
PF3D7_1466300	82.8804	82.0149	82.6554	86.8098	88.6966	90.0121	91.0334	92.9548
PF3D7_1466200	45.8023	49.1778	56.2922	60.6889	57.6597	57.2269	47.6891	39.7438
PF3D7_1466100	55.9114	33.7026	25.0909	20.1489	28.5615	45.1099	60.5158	66.834
PF3D7_1466000	30.708	21.6202	15.0078	23.2993	14.2808	16.2022	16.1676	16.1676
PF3D7_1465900	95.0666	98.4075	98.8922	99.0999	99.2903	99.1518	98.8402	98.3902
PF3D7_1465800	8.25688	7.96261	9.93595	11.0784	17.5697	19.4045	19.5257	15.5098
PF3D7_1465700	14.6962	18.4525	29.8079	37.5801	34.4296	31.8678	27.3671	16.7734
PF3D7_1465600	9.90133	15.8733	32.3092	46.062	28.0942	24.1302	19.6815	13.8826
PF3D7_1465500	9.88402	12.4632	12.1343	11.1477	8.48191	7.47793	7.61641	8.23957
PF3D7_1465400	91.5873	93.5261	93.6126	92.6779	86.7578	82.1707	67.6129	61.1563
PF3D7_1465300	29.0808	59.3734	62.3507	64.878	59.7196	48.0699	42.548	35.9356
PF3D7_1465200	34.421	66.557	69.9325	67.3706	66.9205	64.8087	59.5465	38.9476
PF3D7_1465100	38.4975	17.5177	17.3706	16.7734	21.7241	25.74	33.2872	55.8248
PF3D7_1465000	76.5103	49.749	39.6573	33.6766	29.7992	52.8821	70.2095	81.3052
PF3D7_1464900	80.8205	84.9576	84.6979	86.377	84.2998	82.5169	76.0429	67.6649
PF3D7_1464800	11.1736	8.56846	10.7409	19.6469	2.92539	2.93405	2.80422	2.38878
PF3D7_1464700	85.7539	77.497	72.6675	76.493	74.6408	71.9578	65.6742	72.8925
PF3D7_1464600	95.8456	92.4875	91.8643	91.0507	92.6259	90.6699	84.9403	76.5795
PF3D7_1464500	59.9792	50.6491	57.4866	58.1271	60.5158	57.4866	57.902	66.6955
PF3D7_1464400	81.9976	91.9681	92.4009	93.4222	92.9548	91.068	86.5674	86.4982
PF3D7_1464300	9.69361	22.4857	26.5882	26.7267	12.9566	13.9865	15.1463	9.8494
PF3D7_1464200	57.1404	69.3266	69.7075	61.4852	55.0113	50.4068	36.0568	27.9903
PF3D7_1464100	32.889	35.2086	48.4334	47.2044	40.1419	46.8409	47.741	37.1473
PF3D7_1464000	83.1747	92.3663	92.6952	90.0987	86.6713	85.3384	81.4437	72.806
PF3D7_1463900	88.8697	60.6197	46.1831	32.7852	17.8293	17.31	15.8906	75.4025
PF3D7_1463800	37.355	8.53384	28.4577	12.9306	30.3964	29.929	32.8025	33.443
PF3D7_1463700	38.6187	65.6223	73.481	70.521	70.7634	61.5544	59.4945	57.677
PF3D7_1463600	25.4371	32.0928	40.8776	37.1819	48.0613	52.2936	64.8433	61.6237
PF3D7_1463500	76.216	83.9017	80.3358	65.6915	46.0273	40.367	60.2562	62.4199
PF3D7_1463400	60.4293	75.7487	78.1028	75.8698	77.0815	73.3599	57.5558	36.8703
PF3D7_1463300	24.3379	18.089	8.09244	11.113	37.4589	46.8063	54.8728	53.3495
PF3D7_1463200	46.9102	41.5267	39.1812	33.9103	48.0872	79.6434	86.1001	81.0801
PF3D7_1463100	2.6744	5.74693	7.11442	6.23161	2.92539	8.67232	8.03185	7.18366
PF3D7_1463000	42.2018	61.0524	64.4452	59.1483	54.3362	53.2283	51.9128	51.3242
PF3D7_1462900	16.2368	47.3775	55.4613	53.2456	42.5134	34.0488	27.8172	22.2088
PF3D7_1462800	98.6152	99.8442	99.8442	99.8961	99.9654	100	100	99.9481
PF3D7_1462700	69.0843	56.1883	48.1392	47.1352	52.986	79.8858	88.8004	91.3277
PF3D7_1462600	5.57383	5.66038	6.97594	2.89077	7.46927	2.93405	5.83348	8.01454
PF3D7_1462500	9.17431	7.85875	12.5671	13.2075	9.10507	6.33547	15.2155	14.125
PF3D7_1462400	69.3266	77.1681	74.7966	70.7114	55.9979	47.0833	33.3391	23.732
PF3D7_1462300	77.5662	86.7751	88.385	87.9868	84.7326	82.1187	83.192	83.3997
PF3D7_1462200	38.0301	32.889	13.649	25.7746	50.9174	63.372	67.9072	72.0616
PF3D7_1462100	27.9124	12.9652	11.5285	13.2595	29.4963	36.2991	41.9941	46.8409
PF3D7_1462000	11.0265	8.50788	3.32352	2.89077	13.5018	9.07045	2.80422	16.1329
PF3D7_1461900	53.0033	83.0881	86.0135	87.5022	89.1466	88.7831	83.694	60.0138
PF3D7_1461800	43.4135	50.2683	52.4147	48.4681	30.708	21.7587	19.0583	17.8293
PF3D7_1461700	43.2751	51.5319	48.1219	47.6026	35.4336	24.0609	22.9877	20.7547
PF3D7_1461600	78.8818	91.068	90.6007	89.7525	86.5674	83.5555	80.8551	74.035
PF3D7_1461500	12.8267	32.7592	36.7838	29.9723	14.3846	12.0824	9.72823	10.3168
PF3D7_1461400	94.807	79.6088	60.3774	49.4374	33.2526	29.1155	35.8317	74.5889
PF3D7_1461300	97.2823	97.7324	98.0267	98.6844	99.0133	99.2037	99.1864	99.3768
PF3D7_1461200	71.9058	82.1361	83.4862	79.8511	80.9244	75.9737	61.2429	46.4947
PF3D7_1461100	31.9024	11.8574	12.0651	17.7341	33.1141	27.8864	26.9863	30.5176
PF3D7_1461000	26.9257	14.9732	22.0876	17.8293	29.6694	38.9476	38.4109	35.9702
PF3D7_1460800	25.1688	24.7793	20.6076	32.5602	46.6678	45.3176	45.1618	49.2816
PF3D7_1460700	95.6725	98.5113	99.0479	99.0479	99.3422	99.2557	99.0999	98.3555
PF3D7_1460600	90.4449	66.0377	51.4281	30.1627	22.6588	27.3152	30.9676	50.3029
PF3D7_1460500	47.7584	33.0275	33.3045	35.0182	46.1312	53.1245	61.3294	64.4279
PF3D7_1460400	48.9527	59.3388	65.0164	81.4437	77.8259	70.7288	68.0111	61.7102
PF3D7_1460300	91.6219	95.7764	97.4035	97.2996	98.0267	98.1132	97.8189	97.4554
PF3D7_1460200	33.0102	31.2619	23.5589	22.555	36.4463	50.8395	47.8276	35.8491
PF3D7_1460100	75.8698	73.8619	71.525	61.7449	55.5479	46.5813	29.1328	21.2394
PF3D7_1460000	42.6865	20.4951	7.91068	16.0983	18.0976	9.69361	13.2941	12.1516
PF3D7_1459900	77.1681	43.8636	25.7919	14.4885	10.9919	9.81478	6.75956	47.3948
PF3D7_1459800	77.6181	74.8139	79.7646	82.0322	90.9642	92.4875	93.5953	93.2491
PF3D7_1459700	36.9569	29.1241	18.9025	26.8652	34.5681	65.8993	78.1721	51.4973
PF3D7_1459600	62.8008	70.4172	73.1868	68.4438	61.9006	54.2496	56.673	61.6929
PF3D7_1459500	9.13969	11.9439	19.1103	22.4857	34.395	33.9969	29.427	17.5524
PF3D7_1459400	69.292	77.7393	83.417	75.4198	53.0379	39.3803	53.488	82.7073
PF3D7_1459300	60.7755	60.9313	56.8461	52.3628	41.6998	34.8797	50.8828	72.9617
PF3D7_1459200	80.5089	81.7725	79.1414	72.7713	66.7648	61.0351	53.0552	50.2337
PF3D7_1459100	11.7016	18.0544	21.7154	22.6761	30.0329	30.8118	25.0649	19.4045
PF3D7_1459000	88.887	93.5953	93.6818	91.9162	85.8577	87.0521	88.2638	86.5328
PF3D7_1458900	52.6484	69.5517	71.0576	62.9046	58.3175	54.5785	61.1736	72.9791
PF3D7_1458800	37.6839	60.2908	65.328	60.7582	56.1018	45.6119	35.3298	28.7173
PF3D7_1458700	75.8958	43.5174	33.945	26.9171	46.3909	61.0698	56.8807	65.5184
PF3D7_1458600	68.79	75.1601	75.4025	70.8672	67.0071	57.7116	52.6571	54.6304
PF3D7_1458500	45.5427	26.2074	31.4523	34.4296	22.9358	31.6081	51.2896	69.2055
PF3D7_1458400	15.2761	41.319	54.8901	54.4054	60.2043	54.1977	52.1551	41.2844
PF3D7_1458300	64.9299	35.676	21.3779	16.6176	14.8433	22.1049	40.7132	70.0883
PF3D7_1458200	70.3999	75.6794	78.5183	74.0177	53.8861	46.2697	68.5477	79.5222
PF3D7_1458100	78.4317	86.6367	89.0601	84.9057	72.1482	69.4651	83.3478	88.6446
PF3D7_1458000	83.6593	84.4902	82.5169	81.8072	80.1281	72.4598	60.7062	56.3787
PF3D7_1457900	57.7809	60.2735	63.5451	60.5505	51.1511	44.6599	51.1684	75.6275
PF3D7_1457800	16.9811	12.8094	20.9884	17.6822	15.4146	19.3786	22.503	26.744
PF3D7_1457700	74.1215	81.4956	83.2093	81.4263	82.8458	77.9297	57.8501	32.7679
PF3D7_1457600	54.5612	63.3893	70.521	65.605	59.131	51.7223	41.2844	38.2378
PF3D7_1457500	65.3973	34.5248	27.1508	23.4378	36.4722	39.1899	40.9901	44.833
PF3D7_1457400	38.3071	51.4108	50.1644	49.5413	33.9103	30.1367	38.2725	55.3055
PF3D7_1457300	82.8458	87.1387	89.3197	87.0521	89.2851	89.0601	87.104	75.1255
PF3D7_1457200	81.0628	61.1217	75.991	85.8231	86.1693	93.2837	95.534	96.8323
PF3D7_1457100	39.2245	30.2233	42.0634	53.0898	45.9754	38.5321	35.2951	41.2325
PF3D7_1457000	90.0814	85.8404	91.0853	93.1625	93.803	93.0068	94.0454	96.2783
PF3D7_1456900	47.8968	70.1921	74.8485	79.7992	72.7886	67.1283	64.9991	64.099
PF3D7_1456800	95.7937	97.0919	97.0746	96.9361	96.538	95.9321	92.8683	80.7859
PF3D7_1456700	45.5254	66.1589	69.2747	68.0803	62.8181	61.4333	62.9912	64.7568
PF3D7_1456600	16.2195	13.3374	21.9491	17.8986	29.9636	36.3857	32.0062	31.66
PF3D7_1456500	34.1181	26.8478	24.5975	21.2134	39.4669	53.9553	64.2375	66.4012
PF3D7_1456400	8.79349	10.0052	9.81478	10.8188	6.82015	8.13571	12.4805	10.0052
PF3D7_1456300	19.8806	52.7609	62.143	65.0511	64.2029	53.6091	37.0088	24.2167
PF3D7_1456200	8.36074	7.66834	11.3034	7.49524	35.5375	39.3457	32.4044	22.0183
PF3D7_1456100	7.40869	2.71767	3.32352	6.09313	32.4217	34.8451	27.6268	18.7987
PF3D7_1456000	51.9301	31.158	27.8691	15.5617	32.0582	46.7717	66.1935	74.9524
PF3D7_1455900	43.6732	22.8319	30.2925	14.6876	38.5321	42.9808	62.5757	70.6076
PF3D7_1455800	11.8747	15.3886	16.7561	19.2661	13.0518	11.4419	9.13969	8.53384
PF3D7_1455700	50.7703	32.9583	29.0116	23.0223	23.1781	40.4535	58.7502	69.3786
PF3D7_1455600	51.5492	23.5763	14.1769	8.97525	9.20893	19.318	20.0623	35.2259
PF3D7_1455500	39.4842	55.2017	58.3867	58.8887	56.6211	54.3881	52.9514	61.866
PF3D7_1455400	89.1985	91.9335	92.1759	87.5368	87.4849	88.1426	89.7525	87.2425
PF3D7_1455300	94.9628	84.2133	59.633	48.2257	36.3857	28.0076	14.2981	22.5376
PF3D7_1455100	88.2638	82.7073	80.959	74.5023	78.2932	71.6981	68.1842	63.874
PF3D7_1455000	26.8998	41.2152	28.198	29.8771	19.6642	15.1203	12.7229	14.7308
PF3D7_1454900	33.4257	47.7237	41.7864	45.1965	31.7379	27.2114	20.9278	19.093
PF3D7_1454800	7.28752	16.4186	16.2628	16.306	8.86273	2.93405	2.80422	12.117
PF3D7_1454700	70.6249	86.9482	90.9815	91.5008	90.9988	93.2664	94.8589	93.9242
PF3D7_1454600	31.4869	33.9103	48.8143	55.7037	52.5965	49.6971	52.2936	49.8529
PF3D7_1454500	88.108	88.1426	88.2984	85.3903	87.2598	83.2612	79.4703	81.0282
PF3D7_1454400	86.1174	90.2025	90.9988	92.6086	95.2224	94.6685	92.4875	87.381
PF3D7_1454300	20.5816	31.5042	45.6465	37.6666	32.4044	25.3073	21.8972	23.7147
PF3D7_1454200	51.5319	64.6876	66.834	61.7102	61.416	52.6225	34.3085	23.2127
PF3D7_1454100	35.6067	22.4078	25.5063	14.4625	38.1773	60.7495	74.0869	75.0563
PF3D7_1454000	58.1963	75.6275	78.1721	76.4064	73.0137	69.7421	66.2281	53.3841
PF3D7_1453900	64.5318	73.4984	77.1162	71.75	67.4918	58.5771	42.5827	34.7585
PF3D7_1453800	73.0137	77.6528	80.9244	77.6874	75.5929	69.9152	70.7114	65.2242
PF3D7_1453700	97.1785	98.6498	98.8575	98.7191	99.3941	99.6711	99.5326	98.1824
PF3D7_1453600	11.2515	22.8665	42.6692	47.9661	43.829	44.5214	33.0448	21.0836
PF3D7_1453500	8.94928	18.2621	26.2074	27.4191	19.0237	15.8041	10.6284	9.30414
PF3D7_1453400	34.6806	50.0779	56.0325	53.6091	43.4222	33.893	35.8144	43.4828
PF3D7_1453300	31.3658	49.1605	58.7675	55.3401	51.1165	41.9422	42.9635	50.528
PF3D7_1453200	36.3857	21.0663	11.3208	10.6284	22.7973	23.2127	27.8691	52.2243
PF3D7_1453100	27.0383	15.1809	11.4073	14.0298	16.2195	20.0796	23.005	31.7812
PF3D7_1453000	54.2496	67.6129	71.023	65.9339	61.9699	52.9167	50.8049	51.9301
PF3D7_1452900	36.7665	26.5882	31.435	26.2939	30.6387	38.7052	47.7237	58.3348
PF3D7_1452800	12.9652	12.6709	28.8039	18.9025	33.8238	24.3033	18.3832	14.8866
PF3D7_1452700	56.3095	54.4227	54.44	65.4665	82.3092	87.0694	84.3344	77.0642
PF3D7_1452600	52.1378	47.2391	58.6464	57.3827	45.0234	39.0341	41.0248	44.6079
PF3D7_1452500	59.5119	32.941	29.2539	17.8813	25.4804	37.2425	41.6825	52.6398
PF3D7_1452400	55.3401	75.8006	83.0189	80.1973	78.7606	72.7194	73.4291	70.3133
PF3D7_1452300	18.9545	11.8401	17.0158	11.8314	24.3033	32.1793	40.3843	43.1712
PF3D7_1452200	9.98788	15.7002	15.6136	19.3526	33.7199	30.0502	27.8518	24.2687
PF3D7_1452100	41.2844	65.7781	70.4691	61.4679	58.5252	45.6465	33.9276	22.3472
PF3D7_1452000	86.602	60.7409	44.331	32.4044	14.1942	12.342	13.4153	68.9631
PF3D7_1451900	66.2455	76.216	76.4064	76.7007	77.8086	71.8539	61.641	50.7876
PF3D7_1451800	61.139	51.48	63.0777	77.3585	83.0881	84.9749	87.381	89.7352
PF3D7_1451700	71.4558	44.5214	30.3445	10.611	19.3007	25.2034	43.5693	74.8139
PF3D7_1451600	15.0251	14.2115	16.3926	16.8427	11.615	8.55115	9.37338	16.0118
PF3D7_1451500	29.8252	58.8714	63.3893	56.5778	53.8342	47.3256	42.3922	39.8131
PF3D7_1451300	63.2335	42.2711	37.4329	38.636	58.1271	67.0244	72.9271	77.9643
PF3D7_1451200	95.2744	95.3436	94.4781	92.2105	88.887	87.104	86.0481	86.2558
PF3D7_1451100	91.7085	97.8709	97.9574	98.5286	98.2863	98.546	98.4594	97.2477
PF3D7_1451000	30.5782	32.664	42.6865	55.2536	58.7675	59.0099	56.5345	46.4255
PF3D7_1450900	12.4632	13.7788	10.2302	6.24892	31.3311	50.978	46.7544	31.8851
PF3D7_1450800	15.5963	8.8108	11.0611	10.5591	30.3098	33.2872	34.4123	33.0795
PF3D7_1450700	71.5943	81.4437	82.1707	81.7552	80.5435	75.5236	73.9311	73.6195
PF3D7_1450600	24.3119	53.6784	62.5411	60.2562	57.5212	50.9261	36.6799	31.1407
PF3D7_1450500	60.0831	41.7345	34.8624	33.1487	18.8333	21.3606	25.013	42.0287
PF3D7_1450400	69.3699	72.5463	75.5756	73.2733	70.0883	64.324	59.7023	60.4812
PF3D7_1450300	55.9979	67.5783	73.6368	73.256	66.5051	60.8967	55.7556	41.2152
PF3D7_1450200	59.2695	67.0936	73.8446	73.0656	63.095	56.1883	54.9074	40.9901
PF3D7_1450100	78.4663	85.373	83.7459	85.0268	76.9431	75.8871	70.5557	72.1655
PF3D7_1450000	81.963	74.8485	70.8672	65.5531	58.7156	53.1764	45.1099	38.1513
PF3D7_1449900	68.6169	61.6583	66.4532	62.7488	62.8354	57.2442	57.3481	56.7769
PF3D7_1449800	42.9462	55.8162	61.3467	61.0351	56.6038	44.4868	44.9022	52.3109
PF3D7_1449700	54.8555	66.609	69.4997	65.6742	60.8967	50.3549	45.8196	42.6519
PF3D7_1449600	70.6768	44.3483	37.0348	35.122	33.5122	21.6895	19.1622	49.472
PF3D7_1449500	66.0897	61.0005	69.1016	69.8459	69.5344	74.7966	78.5183	77.7047
PF3D7_1449400	53.3495	28.2673	21.0403	14.8174	36.628	46.8929	49.0566	52.5705
PF3D7_1449300	73.0483	82.4996	79.6434	74.0696	64.1509	51.7397	49.247	54.1804
PF3D7_1449200	99.7577	96.763	90.4449	78.7606	52.4667	58.8195	78.7952	99.5846
PF3D7_1449100	72.7886	47.516	37.8657	29.427	17.9678	26.467	38.0301	69.6382
PF3D7_1449000	21.7414	25.5323	31.2273	12.7575	14.5404	10.2995	7.54717	11.2861
PF3D7_1448900	30.1108	37.4589	39.3543	42.4615	46.5293	55.4873	58.0232	50.3375
PF3D7_1448800	37.4762	57.6943	61.0178	56.6297	57.0019	62.4892	59.6503	53.7649
PF3D7_1448700	37.8224	53.8342	57.9886	55.167	54.9766	44.2098	31.0369	30.3791
PF3D7_1448600	63.4239	70.5383	72.2347	69.8286	73.6541	71.7154	64.0125	63.4412
PF3D7_1448500	68.6862	45.4388	37.8051	35.5375	53.3668	66.834	76.3891	82.8631
PF3D7_1448400	50.3029	34.4643	38.8956	50.8568	65.7608	66.6782	78.3452	82.0841
PF3D7_1448300	68.2967	65.9858	69.5863	72.5982	70.3306	72.3732	80.18	86.0135
PF3D7_1448200	10.1264	10.5591	11.165	10.1956	11.2515	9.64168	9.64168	10.161
PF3D7_1448100	36.6972	56.2922	62.5584	59.6676	54.4573	51.1338	39.2245	34.4296
PF3D7_1448000	57.9366	78.4144	81.4783	80.5782	76.2506	68.9804	52.709	32.7506
PF3D7_1447900	41.8903	37.9609	53.9207	65.0684	82.7246	84.6633	73.8446	46.9275
PF3D7_1447800	38.584	44.1232	56.2576	64.8953	73.4291	68.6862	59.5638	50.6837
PF3D7_1447700	52.3801	38.8956	55.7383	60.5851	56.7769	48.745	61.3813	77.2546
PF3D7_1447600	23.2647	21.9491	34.0748	30.1281	19.543	20.1316	13.1902	11.3467
PF3D7_1447500	38.5667	21.7241	17.3273	14.5318	18.2534	13.8394	10.9659	12.1863
PF3D7_1447400	40.1246	55.3401	70.3133	79.5049	78.1374	76.1641	63.7355	33.945
PF3D7_1447300	27.471	34.8451	45.9062	41.8729	49.3163	63.597	71.4038	52.986
PF3D7_1447200	82.3611	92.0028	93.353	92.6606	90.0987	88.3504	88.0388	86.8098
PF3D7_1447100	72.0616	86.0827	87.6406	86.9136	81.2359	77.1162	77.8086	74.9351
PF3D7_1447000	96.5207	98.8922	98.9787	99.3595	99.498	99.5846	99.4115	98.996
PF3D7_1446900	59.8754	63.3028	65.1203	79.73	79.6434	83.14	84.144	88.1946
PF3D7_1446800	53.2976	29.7992	33.7805	25.6535	56.95	73.758	74.5543	65.0338
PF3D7_1446700	64.601	36.5588	29.5309	35.3298	45.508	48.6585	52.1897	71.1961
PF3D7_1446600	93.4914	78.8472	57.6251	51.0126	47.8968	76.216	89.2678	94.6339
PF3D7_1446500	56.2403	74.2254	77.5662	79.8338	77.0123	74.8485	71.802	69.9671
PF3D7_1446400	16.1676	20.9971	25.5496	40.6786	37.6666	32.4909	36.403	28.3971
PF3D7_1446300	76.5622	59.5465	49.6971	52.5359	51.6012	44.8676	32.7506	27.1075
PF3D7_1446200	62.1084	82.4476	91.57	94.7378	93.8723	94.2011	95.2224	91.8124
PF3D7_1446100	29.3751	27.6095	29.6174	31.5042	17.1889	14.0211	13.4326	11.0784
PF3D7_1446000	35.9616	47.6718	46.5293	41.2584	27.2633	13.4672	13.3287	25.1688
PF3D7_1445900	91.2931	95.5167	95.4302	95.7244	94.7551	94.028	91.7604	83.694
PF3D7_1445800	11.9093	12.8354	17.3446	15.0424	14.8174	12.1689	19.8546	23.4032
PF3D7_1445700	82.6034	89.0774	90.566	90.3237	93.0933	92.7125	91.2065	85.425
PF3D7_1445600	79.6607	83.1747	80.5608	83.7113	78.0855	74.5716	68.288	62.9912
PF3D7_1445500	78.3279	71.2827	72.9358	75.1601	74.2773	66.6609	50.6145	41.9595
PF3D7_1445400	85.8577	85.8577	87.1213	87.4502	89.2159	84.0921	76.3372	55.5825
PF3D7_1445300	18.1409	30.7253	30.3618	28.4923	28.9597	34.1181	44.2963	34.897
PF3D7_1445200	78.9337	88.1253	87.5368	88.0561	84.8537	83.919	73.2906	55.2709
PF3D7_1445100	45.1099	65.3973	69.794	67.1456	56.1537	48.1219	40.1246	37.3377
PF3D7_1445000	51.3588	30.3964	35.9529	24.3812	25.3246	30.1021	46.1658	67.2494
PF3D7_1444900	29.9117	19.7421	34.2479	21.8279	28.4923	35.5029	32.0755	21.3952
PF3D7_1444800	99.7923	99.6019	98.2344	98.8922	99.6019	99.8096	99.7403	99.6019
PF3D7_1444700	36.4203	30.3964	35.4336	30.9157	48.6585	66.5397	74.537	71.0403
PF3D7_1444600	33.7026	36.8963	40.8517	32.6294	35.0528	32.889	43.5174	50.7357
PF3D7_1444500	79.228	81.6687	83.0708	68.7208	48.8143	36.6453	38.0647	46.3216
PF3D7_1444400	36.3164	58.5598	63.4585	57.2962	45.9235	36.351	29.3232	20.27
PF3D7_1444300	87.7272	77.3066	73.4464	77.4104	82.7073	84.8191	88.0561	90.618
PF3D7_1444200	47.9834	27.973	16.7907	19.8373	7.92799	9.46858	21.9837	29.7559
PF3D7_1444100	41.1805	25.2553	22.2607	21.1528	19.2834	22.9358	22.3126	19.768
PF3D7_1444000	6.78553	8.75887	13.3028	15.2847	13.7528	17.0331	16.0464	16.2022
PF3D7_1443900	42.1153	44.9541	46.8929	62.0564	78.1201	82.1361	82.7938	77.7566
PF3D7_1443800	46.9794	60.5158	65.9858	68.3573	68.5823	66.4359	66.9205	71.5769
PF3D7_1443700	51.6704	24.8918	20.7893	15.2155	27.8172	38.5494	46.0273	61.5025
PF3D7_1443600	16.6696	8.83677	11.6843	9.01852	27.0209	31.0023	30.1541	34.1873
PF3D7_1443500	28.1288	19.3872	25.1342	46.5293	72.1309	73.8619	60.6889	35.9529
PF3D7_1443400	44.8503	28.3798	34.6547	51.4108	62.87	62.2642	70.4864	72.529
PF3D7_1443300	59.2868	87.7445	92.0893	92.1932	90.1333	88.333	87.156	81.0628
PF3D7_1443200	18.0024	17.5524	30.8638	44.6945	50.2337	45.8542	33.8411	26.6747
PF3D7_1443100	70.3652	51.1338	54.0765	66.332	69.1016	67.3014	66.557	82.0668
PF3D7_1443000	56.0325	28.5788	18.6083	12.5844	20.2008	26.1554	30.1021	40.4535
PF3D7_1442900	78.5529	84.2652	85.7365	79.4703	62.5411	58.3867	64.1163	74.8658
PF3D7_1442800	28.8731	39.588	49.524	45.4388	31.4004	26.242	29.7732	26.5709
PF3D7_1442700	36.2645	23.8186	21.3606	17.1023	14.1769	22.001	35.174	51.9128
PF3D7_1442600	13.4499	26.744	35.4509	39.3803	34.0488	25.8785	21.1875	16.9984
PF3D7_1442500	15.4492	19.0583	44.2531	54.6997	68.4092	68.34	57.8674	40.7997
PF3D7_1442400	69.7075	44.5387	46.9102	67.9245	81.1148	68.7208	65.0857	69.7594
PF3D7_1442300	79.0549	85.6154	86.4809	85.0961	87.0002	86.0654	84.0402	77.2719
PF3D7_1442200	34.1354	33.5295	29.9463	26.6055	31.4177	37.9089	37.1127	28.1807
PF3D7_1442100	38.6879	15.4059	3.32352	41.57	63.3028	70.798	75.766	77.4797
PF3D7_1442000	17.9851	23.2474	31.1234	52.484	60.2648	61.918	45.2484	29.2886
PF3D7_1441900	54.3448	71.4731	77.7912	78.0163	80.5955	71.0403	72.7886	72.027
PF3D7_1441800	50.4241	46.5293	51.1684	54.1111	63.0604	64.3587	64.8607	63.7701
PF3D7_1441700	17.4139	14.1423	18.7641	8.80215	31.2446	32.9756	32.1793	29.3924
PF3D7_1441600	51.1338	29.5655	43.5693	46.7024	42.4442	31.5389	28.1634	39.5534
PF3D7_1441500	50.9434	55.6344	62.896	60.3427	57.8328	58.7156	69.2228	75.9737
PF3D7_1441400	44.833	60.4466	67.561	79.9204	85.0615	87.6926	88.9562	83.8497
PF3D7_1441300	48.7277	35.8491	39.8996	39.9342	21.499	13.5364	20.7547	44.5214
PF3D7_1441200	76.6834	88.385	92.3317	94.1838	95.4128	94.1319	93.4568	92.5048
PF3D7_1441100	99.0826	99.3768	99.0999	98.4594	97.767	98.1651	97.9055	98.269
PF3D7_1441000	32.941	57.6424	63.4239	59.9446	55.3228	44.4002	36.9915	28.9077
PF3D7_1440900	71.5596	44.4868	36.2991	16.8946	10.1091	2.93405	10.663	34.6893
PF3D7_1440800	37.5627	27.4537	28.0769	51.0992	69.2228	70.4691	65.8993	59.5638
PF3D7_1440700	38.2551	23.3339	42.0287	58.0232	63.8307	54.8728	50.0433	61.8314
PF3D7_1440600	21.7587	19.1449	24.0003	26.2247	29.3751	26.2593	23.2647	20.7201
PF3D7_1440500	33.9969	40.7824	58.8021	66.9032	74.7447	62.1084	31.9716	32.8544
PF3D7_1440400	59.3214	26.0516	16.86	11.8054	8.45595	10.5072	18.2448	53.8515
PF3D7_1440300	19.0583	15.8214	18.037	38.5148	48.1046	46.3043	43.2231	35.4769
PF3D7_1440200	15.1116	9.93595	14.0904	36.4376	44.0194	43.7251	42.0634	34.8451
PF3D7_1440100	70.9192	43.6559	23.3166	20.045	39.9342	53.9727	75.8439	85.875
PF3D7_1440000	36.6107	16.2195	15.6656	11.5112	14.073	24.9091	35.0528	52.8129
PF3D7_1439900	70.9538	91.8816	93.4222	94.6858	95.8629	96.9881	97.04	94.9974
PF3D7_1439800	77.8432	79.5049	87.4156	89.4582	90.4276	90.3583	92.5567	93.5607
PF3D7_1439700	36.1174	34.2219	40.5401	34.3431	41.821	59.7023	74.2946	70.6941
PF3D7_1439600	79.678	55.0113	43.9501	43.8982	50.9607	62.5757	84.8364	90.3064
PF3D7_1439500	80.9763	67.111	60.914	41.5267	24.009	22.9531	32.2486	51.6358
PF3D7_1439400	86.2039	70.6076	57.0798	53.0033	44.279	75.7833	90.6353	93.578
PF3D7_1439300	76.7873	71.3692	71.2654	68.34	68.2361	61.6756	66.834	74.1734
PF3D7_1439200	15.6829	43.4828	53.7822	52.5186	42.2365	33.5988	31.0023	27.7653
PF3D7_1439100	18.9372	53.1591	58.7848	57.9713	50.1471	44.6945	39.6573	31.4696
PF3D7_1439000	75.8958	51.2377	36.9569	19.8892	31.5216	48.4421	76.5449	92.7298
PF3D7_1438900	84.646	96.4168	97.6112	97.8709	97.5939	98.0267	98.2517	97.04
PF3D7_1438800	39.8909	38.6879	36.853	35.2951	22.053	15.6136	12.0651	11.7708
PF3D7_1438700	41.4056	39.4928	27.5056	28.5442	40.2631	61.6583	79.2972	76.1641
PF3D7_1438600	56.223	65.7608	67.7341	61.1736	57.4693	51.2723	58.3521	54.8208
PF3D7_1438500	52.0685	68.288	69.1189	69.5863	69.0324	65.9858	56.171	38.1167
PF3D7_1438400	78.3105	51.0299	54.7343	60.7062	63.5105	54.6477	41.8556	51.4281
PF3D7_1438300	2.6744	2.71767	3.32352	21.8539	25.1255	2.93405	12.3161	24.6668
PF3D7_1438200	21.3086	23.758	3.32352	26.4151	2.92539	2.93405	2.80422	2.38878
PF3D7_1438100	84.4556	85.927	89.2505	88.4196	84.4383	83.9363	89.7871	94.1492
PF3D7_1438000	81.911	89.8217	92.0374	90.8949	90.3929	89.1466	88.1599	82.6034
PF3D7_1437900	93.9415	96.3476	96.5207	96.538	96.9361	97.5593	97.1612	94.1146
PF3D7_1437800	57.7982	73.7753	68.9804	80.682	71.9924	76.9431	64.826	63.7355
PF3D7_1437700	49.1605	32.6294	23.6974	27.6441	25.6188	32.9064	50.2683	63.2681
PF3D7_1437600	12.7921	10.0917	7.92799	7.89337	33.1833	41.7518	40.5228	27.4018
PF3D7_1437500	71.4038	68.5823	68.7554	59.8234	56.0499	50.0952	64.5491	81.2359
PF3D7_1437400	31.7466	28.2326	51.0819	58.8021	66.0897	71.8712	71.0923	56.9154
PF3D7_1437300	84.2306	49.4894	39.6746	40.869	24.511	26.3026	31.3658	76.8911
PF3D7_1437200	84.4902	63.6836	57.0019	64.4106	60.914	76.7699	91.3623	93.3356
PF3D7_1437100	46.3909	46.1485	41.371	35.0961	27.0556	33.3391	61.2775	77.3758
PF3D7_1437000	72.5117	77.22	79.9204	79.0549	71.1442	66.6263	69.4997	75.9044
PF3D7_1436900	43.4308	50.1818	56.7596	63.3028	49.1951	45.8023	46.8409	36.7665
PF3D7_1436800	31.6773	14.2981	22.2953	33.7719	46.9621	52.7956	63.8047	69.569
PF3D7_1436700	24.234	13.9519	21.1702	25.8266	39.1553	40.1593	50.1125	50.5626
PF3D7_1436600	91.4662	70.3306	51.6012	38.7745	23.6368	28.3019	48.52	82.4649
PF3D7_1436500	28.25	25.6794	42.1586	46.2783	46.5899	45.5427	48.0872	47.8103
PF3D7_1436400	13.5711	24.8745	33.2006	42.5827	39.0514	30.4483	25.0995	18.089
PF3D7_1436300	98.1824	96.5899	95.2744	95.4302	93.2664	88.4715	71.4731	46.5293
PF3D7_1436200	82.4823	53.1418	39.2245	27.5056	14.575	18.591	18.539	56.0845
PF3D7_1436100	53.0552	69.9844	77.1508	70.1229	63.8913	55.946	60.1523	63.6143
PF3D7_1436000	48.8662	77.9817	89.3543	93.3356	95.4302	94.3569	91.9855	78.4144
PF3D7_1435900	10.5418	10.2822	12.9998	30.0329	19.0064	27.5229	32.0582	28.6308
PF3D7_1435800	20.9278	20.9624	10.4726	11.6496	33.4083	38.0474	30.8118	22.6415
PF3D7_1435600	88.9735	64.3587	50.9434	36.9396	18.1582	17.6735	22.3992	47.0313
PF3D7_1435500	66.4012	79.3838	83.2266	84.4556	84.0402	82.8458	87.0175	88.9216
PF3D7_1435400	52.2763	72.0443	80.5262	79.6434	83.4862	82.3957	84.7499	85.5288
PF3D7_1435300	77.2893	54.2842	38.9302	27.696	26.017	29.0289	45.3523	56.0672
PF3D7_1435200	76.4757	56.7942	45.0234	40.0727	28.3019	21.9145	23.2474	36.6972
PF3D7_1435100	24.1215	15.5704	7.29617	18.7468	32.7938	50.5799	63.4239	59.2868
PF3D7_1435000	44.3829	21.8452	22.2088	23.7926	34.6893	50.2164	64.7741	59.1137
PF3D7_1434900	30.206	17.5697	3.32352	19.7507	14.7828	8.23957	13.9519	20.8586
PF3D7_1434800	48.9008	41.0767	33.443	63.597	89.4755	92.9202	89.389	69.6036
PF3D7_1434700	59.408	60.9832	64.8607	88.5754	93.9588	94.9455	92.1412	81.2879
PF3D7_1434600	82.1534	89.0601	89.614	88.2811	88.1599	86.879	80.8378	60.6889
PF3D7_1434500	57.2789	73.9311	76.7353	78.2586	76.8392	69.1362	50.5972	30.6214
PF3D7_1434400	87.9349	61.7795	46.6851	26.1901	16.6522	18.4698	20.5989	43.8463
PF3D7_1434300	81.2532	92.2624	93.9934	94.582	96.1572	96.0879	95.0493	87.5022
PF3D7_1434200	96.261	93.3183	93.7338	95.9495	95.5859	96.8323	97.5939	98.5113
PF3D7_1434100	26.5449	58.8021	64.376	66.7994	70.4691	59.1483	29.5482	26.5882
PF3D7_1434000	33.4603	73.6715	78.3105	80.1108	81.5994	82.5688	74.7793	43.9328
PF3D7_1433900	32.8371	18.8679	12.2382	17.3966	23.784	28.1634	34.8797	41.4488
PF3D7_1433800	36.9742	19.2487	16.583	23.5849	35.4509	34.5854	40.4016	54.0419
PF3D7_1433700	35.2086	19.9411	17.3706	38.2205	51.9993	55.8421	52.3282	48.3469
PF3D7_1433600	52.1897	40.7045	43.5001	48.7104	66.7821	78.5356	86.8963	87.5887
PF3D7_1433500	95.4128	92.2451	86.8271	82.8804	67.3879	67.7341	74.8485	71.1269
PF3D7_1433400	74.035	58.2136	65.6223	76.2853	79.3665	83.1747	82.9323	88.3677
PF3D7_1433300	69.8459	50.8395	57.6078	62.5065	61.364	51.0992	46.6851	63.0431
PF3D7_1433200	22.3472	13.848	16.2195	37.6839	31.9889	18.8852	17.1542	12.8267
PF3D7_1433100	24.4591	44.3656	55.6344	52.259	44.6079	37.5974	32.9064	34.4643
PF3D7_1433000	77.3931	88.4023	90.6526	89.4409	90.6872	88.2465	83.8671	78.1374
PF3D7_1432900	68.8939	66.8167	58.3348	64.7914	32.0841	26.6574	32.2313	69.3613
PF3D7_1432800	46.3736	34.2565	50.2856	57.0365	64.1163	60.1869	65.4492	66.2455
PF3D7_1432700	61.6583	55.6171	47.3256	41.12	45.7504	81.7899	92.3836	92.9029
PF3D7_1432600	19.6642	45.7504	56.171	56.7769	49.3336	43.4135	43.3616	39.1553
PF3D7_1432500	45.1965	69.0843	77.3585	73.7407	70.1229	62.593	53.6611	36.0048
PF3D7_1432400	25.9823	20.6682	20.2354	20.5643	17.2062	27.2806	37.0608	32.5775
PF3D7_1432300	42.3922	30.2406	36.7146	37.407	30.1887	24.0436	25.8092	29.9117
PF3D7_1432200	58.3867	32.0582	24.9437	11.9612	12.8008	10.1437	15.0078	47.8795
PF3D7_1432100	55.1497	69.569	74.9351	77.3758	79.5049	78.9164	81.8245	74.26
PF3D7_1432000	52.4321	54.6997	63.372	68.1669	81.3917	84.9576	87.9349	86.1866
PF3D7_1431900	46.0447	30.5003	24.6841	17.0331	12.8267	15.9945	21.5164	31.6773
PF3D7_1431800	13.4845	21.0144	22.4598	13.6922	34.5335	45.5946	44.0194	26.9344
PF3D7_1431700	91.0334	96.6765	97.4381	97.5593	97.7497	97.7151	97.4727	96.4341
PF3D7_1431600	50.2164	39.6053	31.66	41.8556	43.7424	55.1324	75.2467	79.5742
PF3D7_1431500	63.7874	61.9872	68.3053	76.0083	80.2666	82.2053	82.6034	76.6142
PF3D7_1431400	89.7352	64.8433	47.9141	37.3031	16.7561	16.081	15.4059	73.4984
PF3D7_1431300	66.7474	82.3957	85.2865	81.8418	79.9377	76.0949	57.3135	33.3218
PF3D7_1431200	80.6474	84.9749	85.0961	82.4996	74.5716	61.9872	45.058	36.1953
PF3D7_1431100	58.9752	64.4625	58.6117	57.4866	43.2058	30.8984	24.4764	21.6202
PF3D7_1431000	38.6706	37.7532	31.5735	35.2778	30.9849	62.2295	66.4186	53.4187
PF3D7_1430900	71.9751	55.3748	48.7364	39.5707	33.4776	61.8141	80.6474	86.2905
PF3D7_1430800	42.1499	50.0519	48.7623	45.7331	30.2233	23.2647	19.093	22.78
PF3D7_1430700	32.6813	24.1821	20.8586	22.1309	33.3564	63.3374	77.8778	66.9032
PF3D7_1430600	23.5589	14.6097	12.4459	33.4257	44.2444	41.3883	43.2577	36.5588
PF3D7_1430500	17.3793	18.9718	16.1676	12.6277	14.6097	12.8094	12.9998	10.5072
PF3D7_1430400	19.5084	53.5572	54.4227	50.6491	36.351	32.7333	30.2233	25.8785
PF3D7_1430300	46.1831	82.0841	76.7699	70.296	60.0485	65.2415	61.0698	42.4615
PF3D7_1430200	92.3317	71.9578	55.9633	51.7223	32.664	32.4044	33.9796	76.9604
PF3D7_1430100	42.7211	42.825	38.1859	38.4542	56.3961	77.4624	77.5316	57.2442
PF3D7_1430000	67.4572	61.1909	65.9252	78.5875	82.3611	78.6567	79.678	64.5837
PF3D7_1429900	45.9581	36.0568	46.5467	46.5813	43.9155	40.869	39.8131	43.7251
PF3D7_1429800	77.8951	83.3997	84.4556	84.7153	78.4836	75.3851	78.6221	85.1826
PF3D7_1429700	58.2482	67.2321	71.4385	77.2373	72.8406	77.1508	81.2013	79.0722
PF3D7_1429600	42.3057	48.1046	48.6758	42.6259	39.3111	55.2017	70.3306	71.5596
PF3D7_1429500	29.3405	58.179	59.4945	54.7689	44.7637	34.4469	23.6455	15.9598
PF3D7_1429400	28.5788	60.6889	72.1655	74.2254	66.332	51.4627	42.9981	29.0808
PF3D7_1429300	55.5652	58.6117	58.2309	67.4398	51.2896	37.0954	36.2991	28.9424
PF3D7_1429200	18.6429	24.8226	32.2572	33.4949	25.5323	26.1728	25.6881	18.9545
PF3D7_1429100	55.2363	44.2444	48.3036	61.2429	63.4932	70.573	81.4956	87.883
PF3D7_1429000	30.8118	43.327	57.3654	61.9872	60.4293	56.7942	48.1565	44.3656
PF3D7_1428900	39.6746	28.8731	27.4883	31.5389	34.8624	57.4	74.1388	70.6595
PF3D7_1428700	37.2165	40.2285	58.8541	66.0897	73.9657	67.0763	59.0964	62.645
PF3D7_1428600	54.5958	42.8423	28.3452	33.4776	51.7916	71.8193	75.3159	65.5877
PF3D7_1428500	58.8195	69.3786	66.1589	51.7397	31.5562	23.3858	26.3978	28.6481
PF3D7_1428400	19.4565	19.6642	25.0476	20.9105	12.1689	20.0623	28.0422	26.2766
PF3D7_1428300	75.3851	91.2757	93.4741	92.4875	91.4835	91.8297	90.9815	83.642
PF3D7_1428200	90.7911	86.2212	87.0867	83.8497	76.0602	58.404	52.3974	70.7288
PF3D7_1428100	67.4225	54.3535	54.9074	55.5998	53.3841	40.3497	33.0795	39.5015
PF3D7_1428000	44.331	26.0862	21.7154	16.2714	21.049	25.0649	40.6439	64.0471
PF3D7_1427900	75.1601	63.9605	73.6888	88.1426	89.7352	95.1013	96.6419	96.6245
PF3D7_1427800	37.2339	68.4265	74.0869	76.8911	75.1428	72.8925	64.2721	43.102
PF3D7_1427700	47.1871	28.2153	27.6874	18.9718	17.5437	41.1632	78.1028	83.1573
PF3D7_1427600	25.8785	18.6602	20.8066	33.2872	43.8117	52.8302	62.3507	46.01
PF3D7_1427500	28.5529	14.878	18.4871	31.0715	43.05	59.8407	73.5503	67.8726
PF3D7_1427300	33.5901	27.1594	24.2513	22.9358	37.5454	43.5001	53.0206	60.1869
PF3D7_1427200	64.4625	58.7329	60.1523	48.1738	28.0942	26.0862	35.7106	72.7194
PF3D7_1427100	89.0428	91.345	90.9122	86.3943	72.0962	52.207	35.4682	28.0595
PF3D7_1427000	53.1764	34.2046	30.5522	30.4656	49.3855	59.8581	63.1123	59.2176
PF3D7_1426900	88.4542	69.1362	54.1111	49.5067	65.5011	87.5887	93.0587	94.7031
PF3D7_1426800	67.6995	75.714	77.7566	73.4118	67.5437	60.0312	54.942	47.9661
PF3D7_1426700	80.5435	71.4904	69.6209	73.6888	64.4106	53.1071	51.5839	81.8418
PF3D7_1426600	52.7436	36.6453	22.6242	18.0197	14.5577	28.5788	46.1831	59.4772
PF3D7_1426500	38.1167	34.6893	37.5801	38.0994	24.1994	18.3486	20.7374	26.017
PF3D7_1426400	21.499	2.71767	25.3073	11.3554	2.92539	12.2468	16.4445	36.2299
PF3D7_1426300	36.1953	26.1554	26.8825	23.6801	18.3313	16.5657	21.0663	42.323
PF3D7_1426200	51.6877	76.4584	84.8537	90.566	91.6219	92.0374	90.618	80.6647
PF3D7_1426100	90.4968	96.4341	97.7324	97.6978	98.0613	98.1824	97.4554	93.4568
PF3D7_1426000	88.2984	95.3782	97.1958	97.3862	97.8362	97.542	97.265	96.9707
PF3D7_1425900	60.9659	73.2041	77.6181	77.8951	78.0422	68.842	53.6438	39.363
PF3D7_1425800	57.4173	40.7651	37.1646	34.2738	31.5735	31.1927	47.2564	70.2268
PF3D7_1425700	47.2564	52.1205	66.7821	70.9192	67.059	63.3201	69.9758	74.3985
PF3D7_1425600	10.9919	9.62437	14.8693	16.9984	15.6483	17.085	18.4006	15.579
PF3D7_1425500	48.5546	13.7961	9.13969	17.9159	8.56846	15.1463	15.4405	14.9472
PF3D7_1425400	80.1627	56.1018	44.279	29.479	44.6945	45.2484	35.5375	35.0009
PF3D7_1425300	88.9389	66.1762	49.5413	39.2245	49.3509	66.3147	79.0549	83.919
PF3D7_1425200	23.7667	12.7575	8.69829	38.7052	41.8729	39.3976	42.2884	42.4096
PF3D7_1425100	15.2415	34.0834	27.8345	50.7876	36.2645	29.704	22.1568	12.5151
PF3D7_1425000	26.1987	38.584	50.9261	52.1724	49.5586	41.2844	26.4324	22.8492
PF3D7_1424900	13.9432	45.3003	55.3228	49.6451	39.7178	45.9581	26.5363	23.7667
PF3D7_1424800	29.4617	55.3228	55.9287	57.452	56.8634	48.4421	35.0874	26.8998
PF3D7_1424700	56.5692	62.8181	64.601	62.87	67.2494	67.6476	51.4454	40.6439
PF3D7_1424600	58.404	75.9218	81.9456	81.184	87.381	83.8151	81.3398	67.7341
PF3D7_1424500	37.7705	63.9952	68.8593	68.4265	69.768	59.131	51.2723	61.4679
PF3D7_1424400	92.0374	97.265	98.2171	98.269	98.7883	98.494	98.1998	97.992
PF3D7_1424300	17.6735	54.9766	64.2894	60.4812	55.4007	37.6839	33.1314	40.4881
PF3D7_1424200	31.8504	59.9273	67.838	56.7942	47.4554	38.636	43.6039	30.8292
PF3D7_1424100	92.8683	98.0267	98.4767	98.7017	98.8748	99.0306	98.7537	98.0267
PF3D7_1424000	13.6143	53.3841	55.8768	57.6078	59.183	53.0552	30.6214	27.3845
PF3D7_1423900	37.0088	63.597	63.6836	66.4359	70.6422	57.0885	48.4334	39.4842
PF3D7_1423800	53.0725	72.6675	74.0003	73.3079	64.8607	55.1497	55.3228	58.629
PF3D7_1423700	77.947	88.8523	91.1026	91.8816	91.3969	90.3064	89.6832	85.148
PF3D7_1423600	45.9754	48.996	60.9399	75.1947	88.2292	86.5155	73.1175	58.2309
PF3D7_1423500	40.7305	24.7014	41.596	48.4854	38.4975	25.6361	23.0396	25.238
PF3D7_1423400	26.1381	16.2541	19.7161	16.7388	13.121	12.7921	9.31279	9.07045
PF3D7_1423300	92.0547	71.6462	52.8302	39.3976	31.8678	23.8705	15.3713	43.5347
PF3D7_1423200	39.8304	73.1695	76.9604	82.7073	78.7952	78.8472	72.0443	61.7449
PF3D7_1423100	80.7686	55.3921	37.2858	26.1208	18.5044	22.3126	20.3393	27.4537
PF3D7_1423000	78.2067	87.8137	89.2159	88.4888	88.835	86.5847	81.3917	64.8953
PF3D7_1422900	31.8331	33.4083	35.3124	30.3445	17.9159	21.8626	25.2034	19.0064
PF3D7_1422800	28.7519	61.6756	64.4279	64.1683	57.2442	51.6185	50.7357	44.0194
PF3D7_1422700	45.0407	61.7275	69.4651	78.5356	77.2546	73.9484	70.7288	61.5544
PF3D7_1422600	43.1539	21.7414	15.5963	15.1895	23.7147	26.6228	30.9157	41.4921
PF3D7_1422500	45.6985	30.2925	22.5376	24.286	18.0024	25.3592	40.7997	61.918
PF3D7_1422400	61.4506	71.8366	74.6754	71.9751	71.5423	62.143	44.6945	34.3604
PF3D7_1422300	43.1712	58.3521	62.3334	60.2908	56.3441	48.8489	41.8729	38.0647
PF3D7_1422200	75.7313	49.7836	43.5347	44.6252	44.8156	34.5335	31.6341	64.7049
PF3D7_1422100	64.7049	45.3869	35.0528	31.0888	35.2086	49.1778	64.4971	67.6822
PF3D7_1422000	59.91	39.9342	31.9283	36.1779	57.9193	77.1854	78.2586	81.4437
PF3D7_1421900	84.5768	58.1617	46.8755	26.1641	57.1577	76.6315	88.8523	94.4954
PF3D7_1421800	37.9089	41.5094	44.4868	43.1885	42.098	45.7244	32.1274	24.8399
PF3D7_1421700	9.33876	2.71767	3.32352	12.7142	13.1902	2.93405	13.0258	8.15302
PF3D7_1421600	22.0097	53.9727	62.0911	65.0164	65.1203	59.2522	55.6344	44.2271
PF3D7_1421500	18.8852	52.934	62.9392	61.8314	62.1949	58.8021	55.4094	39.5534
PF3D7_1421400	52.0859	79.6607	85.4596	86.6367	89.2505	85.7019	75.212	54.6997
PF3D7_1421300	26.6055	23.9225	19.5344	17.6216	17.0677	22.0876	23.8878	23.5243
PF3D7_1421200	94.3396	98.3729	99.3595	99.4288	99.6884	99.7923	99.723	99.3422
PF3D7_1421150	89.6832	82.2572	86.9309	88.7485	90.566	85.7539	94.305	97.6631
PF3D7_1421100	78.1894	71.5769	61.4679	45.8716	36.0222	30.5522	27.973	26.1901
PF3D7_1421000	26.9604	42.7558	56.6384	54.2496	41.8556	38.8783	37.8743	40.817
PF3D7_1420900	56.6384	40.6266	35.0009	41.4402	39.4495	43.6559	48.7796	60.3947
PF3D7_1420800	2.6744	2.71767	8.22226	2.89077	9.64168	2.93405	7.47793	8.58577
PF3D7_1420700	97.9401	97.2304	96.6245	96.5207	95.811	95.7764	95.084	88.5581
PF3D7_1420600	29.1934	35.9702	39.9862	54.1804	68.6689	74.2167	77.2893	67.9765
PF3D7_1420500	8.30881	9.12238	9.29548	8.94928	7.21828	9.72823	10.386	10.9919
PF3D7_1420400	65.3453	85.7019	88.5754	88.1253	89.337	87.5541	83.1573	66.2108
PF3D7_1420300	69.2574	69.1535	69.0151	60.7409	61.8487	47.014	29.7213	26.1208
PF3D7_1420200	74.7793	48.9701	45.9235	32.8111	35.3384	31.5562	34.2219	53.4533
PF3D7_1420100	19.768	14.5058	15.6829	12.6796	15.2674	17.7255	16.4272	14.1423
PF3D7_1420000	80.9936	93.7857	93.7511	92.6952	90.8257	90.2718	89.4409	84.7326
PF3D7_1419900	58.1097	66.9552	69.9498	64.1163	59.1137	48.9181	38.3936	32.2832
PF3D7_1419700	94.2531	95.8283	96.4341	96.1226	96.0706	95.4821	94.5473	92.4182
PF3D7_1419600	72.7367	64.2721	65.2934	68.3227	61.2775	50.1298	42.4269	46.2697
PF3D7_1419500	31.9197	24.7793	11.3727	7.72027	10.5418	14.0038	26.5882	47.8449
PF3D7_1419400	62.6969	69.2401	69.8113	68.2707	64.6702	55.8248	48.6931	44.5041
PF3D7_1419300	43.4828	79.0376	87.8137	86.0654	87.7099	89.0081	86.5328	67.8899
PF3D7_1419200	19.5603	16.1849	27.3671	41.3017	65.2934	73.9311	73.031	57.7462
PF3D7_1419100	69.067	75.9737	77.8605	73.481	72.6155	66.1243	53.4707	38.7571
PF3D7_1419000	68.0976	50.3895	43.102	39.7092	41.9768	62.6104	79.8858	83.4343
PF3D7_1418900	70.071	79.0029	80.2666	76.3026	74.035	64.6529	46.789	30.5349
PF3D7_1418800	83.2439	83.8151	91.6219	86.654	77.497	85.5981	90.8776	81.3225
PF3D7_1418700	2.6744	2.71767	3.32352	2.89077	2.92539	2.93405	10.5678	9.13969
PF3D7_1418600	2.6744	22.2434	3.32352	2.89077	2.92539	2.93405	10.5678	2.38878
PF3D7_1418500	2.6744	2.71767	3.32352	2.89077	2.92539	2.93405	2.80422	2.38878
PF3D7_1418400	2.6744	2.71767	3.32352	2.89077	2.92539	2.93405	2.80422	16.5138
PF3D7_1418300	32.0235	34.8797	48.5027	60.637	67.0417	68.1842	67.5264	56.3095
PF3D7_1418200	33.3218	26.9863	34.9489	55.0632	56.171	52.2763	52.5878	45.283
PF3D7_1418100	6.61243	5.57383	6.99325	6.05851	6.34412	10.8707	11.9093	7.66834
PF3D7_1418000	74.3292	78.2586	79.2799	83.642	84.646	83.7632	83.0189	88.5927
PF3D7_1417900	36.3684	38.0994	30.0502	30.4137	54.1977	71.6808	81.686	76.6488
PF3D7_1417800	67.4918	49.8875	42.4615	36.9742	55.8248	82.3092	90.566	92.6432
PF3D7_1417700	70.5037	67.5264	71.7674	78.8125	81.8245	82.7073	88.1426	87.2598
PF3D7_1417600	71.075	78.6394	82.0322	81.911	75.9218	67.2148	60.5678	62.2815
PF3D7_1417500	79.7473	90.116	88.4369	88.5061	87.7445	87.2425	81.8418	62.1776
PF3D7_1417400	74.5889	46.8755	35.0701	25.0995	12.6363	13.7961	15.3194	23.9398
PF3D7_1417300	61.4333	32.5948	27.4364	13.5105	12.8787	14.9039	22.7281	42.0114
PF3D7_1417200	82.4476	84.8191	84.5941	83.2612	78.9337	73.8272	68.2534	66.0897
PF3D7_1417100	19.82	26.4843	22.3645	32.2313	38.134	37.1992	48.4854	53.99
PF3D7_1417000	12.7056	15.7867	17.4831	10.3168	15.3021	7.83279	6.80284	9.52051
PF3D7_1416900	55.444	65.8646	71.0923	89.1985	94.305	95.4994	94.7724	88.3504
PF3D7_1416800	28.475	26.8652	21.5164	49.8529	58.0578	55.721	50.4933	42.3403
PF3D7_1416700	50.7011	52.3455	46.564	49.3336	39.5015	25.8266	31.0196	28.3019
PF3D7_1416600	15.2415	16.2714	16.0464	15.7867	15.4752	18.5737	17.1196	12.8613
PF3D7_1416500	95.084	93.0241	85.3903	71.4385	58.5598	61.2948	54.5785	43.9848
PF3D7_1416400	46.0273	55.3575	50.7703	44.6772	26.1728	18.2794	16.2195	14.0557
PF3D7_1416300	44.9887	34.6027	47.6545	58.5252	61.4333	67.4745	76.9604	71.6808
PF3D7_1416200	60.7928	39.3803	34.6027	33.1141	22.2434	26.3978	36.9742	50.1471
PF3D7_1416100	76.2506	76.7353	76.9431	68.2534	61.3986	50.4587	55.7037	73.7753
PF3D7_1416000	8.93197	8.89735	16.1849	15.631	7.7722	9.29548	2.80422	6.0412
PF3D7_1415900	75.4025	86.7405	88.0561	86.9656	86.9482	84.9057	82.8977	77.9297
PF3D7_1415800	66.4705	75.5582	77.9817	77.2893	81.3571	78.5529	62.5065	37.8397
PF3D7_1415700	32.9583	20.4604	20.4778	21.1702	8.23957	11.667	12.844	17.6043
PF3D7_1415600	29.9983	26.6055	55.0805	57.4	53.6264	44.8503	43.9155	52.0166
PF3D7_1415500	21.2394	12.896	8.42998	10.0398	15.579	28.8731	34.2392	38.2032
PF3D7_1415400	40.5228	41.9422	57.4173	73.7061	84.9749	86.2039	84.2998	76.5622
PF3D7_1415300	84.3864	59.2349	40.8776	58.5944	83.3304	88.7485	79.5569	74.485
PF3D7_1415200	77.9817	76.995	75.1255	73.4637	74.4504	66.1935	43.7251	34.5335
PF3D7_1415100	74.3639	46.6332	30.2579	16.1156	20.9278	27.246	29.9983	26.7786
PF3D7_1415000	62.4892	41.2498	34.8797	15.103	27.194	56.4307	73.983	69.0151
PF3D7_1414900	10.8361	13.5018	15.4232	38.6187	45.3523	37.7705	24.1994	15.0424
PF3D7_1414800	68.063	88.1773	86.3078	89.1812	87.0867	87.2252	84.9749	79.453
PF3D7_1414700	69.1189	76.6661	79.0203	76.0429	70.8499	57.3481	41.4056	32.0928
PF3D7_1414600	56.3787	65.3626	66.557	64.3587	48.52	37.407	33.5988	37.8916
PF3D7_1414500	86.9656	77.8951	76.3718	79.8165	62.9739	61.364	60.2389	69.9325
PF3D7_1414400	95.8802	83.8497	66.2108	77.8259	90.7738	93.9934	95.7764	97.3343
PF3D7_1414300	94.5647	97.6805	98.3036	98.6498	99.0653	99.1864	99.0479	98.546
PF3D7_1414200	87.658	78.3798	75.1428	71.7847	68.4265	63.7528	62.0391	68.9112
PF3D7_1414100	69.8979	79.1068	71.9405	70.4345	73.2214	67.8553	52.2763	42.4269
PF3D7_1414000	74.7447	52.4494	54.6131	44.4868	59.1483	76.8046	87.8137	92.5394
PF3D7_1413900	68.3573	84.7499	87.156	86.152	85.5115	84.4383	86.0654	87.8484
PF3D7_1413800	72.8752	75.3678	76.7873	75.2294	72.0789	61.416	34.897	21.1355
PF3D7_1413700	92.349	78.0509	56.8288	43.3097	28.1288	29.5482	27.748	28.475
PF3D7_1413600	17.7428	8.25688	11.4419	6.0412	7.46927	9.45127	13.2249	19.8373
PF3D7_1413500	43.7078	31.3138	19.6988	13.2854	35.0355	55.3748	67.7687	70.5903
PF3D7_1413400	47.1006	35.2605	33.8065	29.5136	42.8077	54.44	66.6263	76.493
PF3D7_1413300	39.5534	23.9051	14.3673	18.1322	35.2605	47.3083	56.95	64.4971
PF3D7_1413200	57.8674	55.5132	55.0978	52.5013	47.6372	47.291	35.5029	29.8252
PF3D7_1413100	7.63372	8.00589	9.88402	10.3514	10.2822	10.3427	9.6763	8.27419
PF3D7_1413000	10.8188	5.72962	3.32352	6.07582	7.64237	2.93405	2.80422	8.75887
PF3D7_1412800	82.1014	94.1492	94.7031	90.3064	73.3599	78.3279	88.9216	89.6659
PF3D7_1412700	17.8639	48.4161	58.4733	62.9566	64.7741	61.2602	51.3415	34.6547
PF3D7_1412600	35.1913	76.3718	80.4397	81.5648	82.6554	81.6341	61.6583	30.5868
PF3D7_1412500	63.3201	91.6219	94.4435	94.807	94.807	92.799	83.5035	59.7369
PF3D7_1412400	50.3722	72.6502	81.0282	78.4144	68.7381	64.5491	65.2761	68.0976
PF3D7_1412300	90.7391	92.9029	94.1146	93.3876	94.7204	95.0147	96.0187	96.8842
PF3D7_1412200	40.1939	65.6396	61.5891	51.9474	45.4388	33.945	24.5456	21.8106
PF3D7_1412100	56.1018	30.3964	29.0462	29.9463	54.2323	63.6143	67.3533	63.6316
PF3D7_1412000	65.8646	39.1033	32.1966	17.7601	15.7002	8.30881	9.07045	32.9583
PF3D7_1411900	85.875	92.072	91.7431	92.2278	91.0853	85.6154	69.5344	35.2778
PF3D7_1411800	63.4585	68.79	64.5491	60.1177	59.4945	57.0192	47.5853	39.2245
PF3D7_1411700	24.0956	44.6079	52.8129	53.1764	43.0846	33.6507	32.9756	35.9875
PF3D7_1411600	15.1982	26.2766	21.8799	19.6642	35.3817	39.4669	36.5934	35.3124
PF3D7_1411500	63.9259	77.5662	79.0376	75.489	74.5196	67.838	51.982	32.2313
PF3D7_1411400	20.0623	29.0635	33.0795	25.4111	28.475	38.4456	45.8369	39.8823
PF3D7_1411300	69.1016	53.7476	59.9619	59.0964	57.2096	50.7357	46.6159	53.8688
PF3D7_1411200	93.8896	89.7698	88.6966	87.2252	84.2133	78.8125	69.4305	69.8459
PF3D7_1410900	84.2825	83.8324	83.2439	78.9856	80.0762	76.1468	68.9631	66.2801
PF3D7_1410800	87.7445	59.5119	48.7364	33.0102	25.74	23.1435	25.6188	79.4876
PF3D7_1410700	66.834	40.9036	29.6694	28.3452	38.636	59.408	83.5382	92.1759
PF3D7_1410600	92.1412	96.7284	96.7457	96.8323	96.5899	96.5899	96.5034	95.5513
PF3D7_1410500	42.7384	54.0246	54.6477	57.4693	52.3109	86.2385	89.4928	70.8845
PF3D7_1410400	98.7883	90.9642	70.5037	57.2789	33.0621	30.1194	26.1295	96.4688
PF3D7_1410300	46.287	60.4293	66.3666	63.4066	52.6225	59.2695	63.6836	55.8594
PF3D7_1410200	67.9938	86.5155	88.5581	90.116	90.9469	89.5447	76.1468	44.2098
PF3D7_1410100	18.6083	30.5176	32.2572	38.359	35.8144	24.5456	19.6123	21.6808
PF3D7_1410000	54.4746	75.0563	82.4649	79.4011	77.947	70.6249	70.6249	73.983
PF3D7_1409900	58.2655	72.6848	78.7779	84.8884	88.2119	88.7312	88.4542	86.3943
PF3D7_1409800	34.1007	36.2126	36.351	67.9765	86.7405	84.7153	81.184	63.3547
PF3D7_1409700	14.5577	15.3194	11.9266	24.4591	38.0994	43.3443	43.6386	33.3737
PF3D7_1409600	55.9806	63.1297	65.1722	59.9273	51.0819	41.5614	33.4776	45.5254
PF3D7_1409500	52.4667	33.4603	24.3552	21.6895	27.6441	28.0942	27.1767	17.7601
PF3D7_1409400	95.309	76.4757	58.4213	49.5586	39.7784	44.331	62.8008	89.2159
PF3D7_1409300	87.381	60.412	46.0447	48.2084	58.9233	59.7542	77.3239	91.1546
PF3D7_1409100	60.2908	58.6983	60.9659	61.7622	68.8766	70.6595	77.5662	80.6301
PF3D7_1409000	35.1393	65.2242	72.3386	71.5423	72.6502	66.2887	54.0073	44.0886
PF3D7_1408900	37.6147	56.95	63.0258	59.8754	63.597	51.9993	34.8451	24.0609
PF3D7_1408800	12.0305	14.0211	21.2221	16.0464	2.92539	8.48191	7.27021	5.71231
PF3D7_1408700	55.946	70.8153	74.3639	70.8845	58.2655	48.9354	52.8475	62.7315
PF3D7_1408600	95.6379	98.8402	99.2557	99.6365	99.6538	99.775	99.6365	99.2037
PF3D7_1408500	69.7767	80.7513	84.1094	84.4902	86.1866	81.3398	74.26	57.2962
PF3D7_1408400	53.5399	42.3749	50.7876	57.8155	62.9219	63.2508	58.2136	53.436
PF3D7_1408300	17.2408	26.6574	21.1009	27.0642	17.2581	17.1629	16.9638	18.591
PF3D7_1408200	71.023	89.4928	91.9681	91.1546	88.4023	84.4729	75.5063	50.1991
PF3D7_1408100	64.5664	84.7672	88.6619	91.3623	92.574	91.4835	90.5487	85.5461
PF3D7_1408000	78.3798	72.9791	72.4251	78.6221	88.5235	89.0947	85.7539	74.5543
PF3D7_1407900	97.5074	97.0227	96.3995	93.0241	91.8816	89.2332	82.2226	59.5465
PF3D7_1407800	94.9455	95.9495	95.3436	94.0973	92.4182	91.57	88.9735	84.923
PF3D7_1407700	17.1542	15.2674	8.69829	7.85875	6.31816	2.93405	8.4646	5.03722
PF3D7_1407600	20.7547	34.8105	35.2605	33.6247	29.4443	26.3285	27.0036	20.8413
PF3D7_1407500	62.2468	76.1641	77.2546	77.8086	77.6701	72.278	62.5411	49.3163
PF3D7_1407400	53.5226	61.3121	60.862	59.4599	56.7423	51.5319	45.4561	51.6185
PF3D7_1407300	91.1026	91.6912	89.7871	91.0334	88.8004	88.8004	87.5714	84.5248
PF3D7_1407200	81.8764	65.6742	59.2609	56.5345	52.5965	47.9488	41.0421	37.2685
PF3D7_1407100	92.4875	96.6245	96.7803	96.7803	96.5034	95.9668	93.6126	82.5342
PF3D7_1407000	16.0291	26.4151	20.772	20.4778	20.3652	17.2408	10.5418	9.88402
PF3D7_1406900	36.3337	22.0183	23.6455	27.2027	42.7384	40.315	30.2752	22.9012
PF3D7_1406800	97.9228	88.4715	70.9538	59.5811	41.3536	63.3893	87.0694	96.9881
PF3D7_1406700	50.026	32.8544	32.4823	42.8769	60.36	68.5823	74.4504	79.1414
PF3D7_1406600	41.319	28.0595	22.6415	39.6746	49.2816	52.3455	57.2269	71.5943
PF3D7_1406500	8.65501	5.76424	10.0398	11.2169	22.8146	24.1908	20.8586	12.8787
PF3D7_1406400	32.3005	15.9945	18.3313	12.1516	36.7319	42.825	55.5306	55.4094
PF3D7_1406300	79.2107	64.9991	59.4772	60.1523	67.4572	81.5129	86.7751	84.3517
PF3D7_1406200	84.5941	89.9602	91.0507	89.9256	87.7618	83.2266	80.1281	75.9564
PF3D7_1406100	51.4454	60.8793	66.6955	64.4971	56.9327	46.5986	42.0287	43.5693
PF3D7_1406000	40.8949	74.7966	74.5543	79.6088	83.7632	85.373	86.0135	81.2013
PF3D7_1405900	84.5248	88.3677	88.4888	86.5674	86.377	81.2359	69.8806	56.3614
PF3D7_1405800	87.5022	91.3277	91.7777	90.3929	89.8909	86.3078	74.9697	52.7263
PF3D7_1405700	79.2972	58.3348	55.3401	53.5745	48.3642	43.1539	36.0395	35.7106
PF3D7_1405600	65.7435	50.7876	44.556	40.4535	70.019	90.566	94.1665	94.3223
PF3D7_1405500	22.7281	60.7928	65.7088	65.3453	62.7575	53.6438	41.596	27.5402
PF3D7_1405400	14.4885	14.8347	20.4085	28.0422	41.1286	40.7651	36.8184	31.435
PF3D7_1405300	36.0048	23.0916	35.1307	45.8023	44.556	37.7185	41.3363	44.8156
PF3D7_1405200	53.1591	39.5274	47.1871	59.3561	64.0298	64.5145	70.9192	64.878
PF3D7_1405100	57.3481	41.7518	52.6052	57.3481	59.685	53.8169	43.4828	32.941
PF3D7_1405000	32.8544	49.3509	50.8222	49.7663	40.0814	36.6799	38.8956	40.9555
PF3D7_1404900	97.2477	94.7031	92.9548	91.9681	91.5527	91.4662	90.7738	88.887
PF3D7_1404800	92.9894	93.6126	92.6606	89.5794	82.3265	60.5678	31.435	20.5643
PF3D7_1404700	84.8364	71.3346	56.1364	48.3123	16.4099	8.51653	19.4565	13.1902
PF3D7_1404500	72.5636	81.6514	82.5515	82.0149	81.686	79.1241	74.7101	63.1989
PF3D7_1404400	39.9169	35.1653	22.3992	28.4144	38.1773	54.8901	63.2335	62.9392
PF3D7_1404300	27.5056	42.046	40.6786	21.5164	10.8188	7.73758	11.1477	18.6256
PF3D7_1404200	27.696	12.0651	26.9431	45.1099	36.5415	22.6848	14.9212	20.1921
PF3D7_1404100	72.1309	86.7925	91.2584	94.3569	96.0879	96.3649	95.7937	93.5953
PF3D7_1404000	29.2366	33.5641	55.5046	60.2389	67.9938	64.2721	61.6237	56.1883
PF3D7_1403900	43.102	58.7848	71.75	84.3171	90.6353	90.843	88.4715	78.3452
PF3D7_1403800	28.9597	24.4418	24.0956	32.0582	33.8065	24.2687	19.9931	22.1395
PF3D7_1403700	33.5295	43.8982	43.0068	37.4243	32.7938	56.1191	63.2681	48.7623
PF3D7_1403600	83.6766	55.6863	52.9167	44.1059	55.2882	58.179	76.6055	84.5768
PF3D7_1403500	66.0377	47.5853	44.6945	46.3736	34.7758	36.4203	39.5188	45.9408
PF3D7_1403400	21.8539	20.27	27.1508	17.2235	27.4191	32.8025	35.0182	41.1979
PF3D7_1403300	9.24355	9.86671	11.39	5.82482	8.81946	14.073	18.4352	17.2062
PF3D7_1403200	23.3685	41.0074	44.4348	43.4135	27.2806	15.7002	16.583	15.6829
PF3D7_1403100	67.6129	48.243	43.327	37.0434	47.291	68.6689	78.8472	83.7632
PF3D7_1403000	20.6509	23.8013	35.2259	31.9889	23.4378	19.6642	14.0384	12.6709
PF3D7_1402900	56.6038	33.0016	39.3111	44.8849	47.3775	33.3045	29.0462	41.8037
PF3D7_1402800	81.6514	73.6368	82.6034	86.4982	79.5222	71.0923	77.6008	83.5209
PF3D7_1402700	57.6943	80.6128	87.883	87.883	87.6753	87.6753	85.0788	70.9365
PF3D7_1402600	40.4708	51.1684	59.5119	58.8195	63.0258	49.4028	39.3976	41.7691
PF3D7_1402500	86.1001	94.3742	96.5726	96.7111	97.4035	97.1092	97.1438	97.0054
PF3D7_1402400	33.4083	50.8568	61.1736	60.0658	52.7263	44.0367	46.062	58.8021
PF3D7_1402300	67.1283	68.3573	74.7274	80.3877	82.9323	81.9976	85.148	89.7525
PF3D7_1402200	93.3703	79.3665	60.5851	54.9939	52.9687	81.8072	91.7085	94.7204
PF3D7_1402100	8.62039	27.471	48.0699	51.4973	47.3083	41.6998	31.8504	21.0317
PF3D7_1402000	15.7954	27.5749	51.9647	59.7542	64.6529	64.7741	63.2854	44.7118
PF3D7_1401900	72.252	58.3867	46.7371	41.3363	33.9623	31.1407	22.9704	20.6682
PF3D7_1401800	85.4769	62.2122	54.4573	64.4798	63.0085	63.0085	64.5145	84.3344
PF3D7_1401700	12.5671	11.0957	3.32352	2.89077	14.1077	14.2981	14.3673	11.7275
PF3D7_1401500	24.6149	43.2058	66.5224	80.8205	79.0722	48.8316	34.9662	25.1342
PF3D7_1401400	99.9654	99.9481	99.9134	99.8788	99.3768	97.4554	94.2877	87.5541
PF3D7_1401300	26.6488	47.1525	58.6983	75.6448	72.7194	41.094	31.1061	30.933
PF3D7_1401200	38.3244	36.9223	19.9411	63.0604	90.6699	93.0241	90.0987	76.9431
PF3D7_1401100	97.8016	98.2517	96.2957	88.1599	81.4263	68.6169	33.5295	19.2314
PF3D7_1401000	9.41665	20.9365	24.9957	15.6483	10.6976	17.4225	17.8466	10.2995
PF3D7_1400900	2.6744	2.71767	3.32352	2.89077	2.92539	2.93405	2.80422	2.38878
PF3D7_1373200	2.6744	2.71767	3.32352	2.89077	2.92539	2.93405	2.80422	2.38878
PF3D7_1372400	14.6789	11.892	9.85806	8.34343	9.88402	21.7414	26.3112	39.588
PF3D7_1372200	90.0121	99.8096	99.8961	99.9308	99.8269	95.8802	87.2598	59.1743
PF3D7_1371900	9.05314	2.71767	24.4937	49.4201	54.1458	48.243	28.9597	10.7495
PF3D7_1371800	11.4419	13.0085	14.9472	21.9837	82.4823	90.0987	77.3412	34.3085
PF3D7_1371700	71.0403	44.1752	29.5655	13.5364	49.6625	57.2789	42.9462	26.8305
PF3D7_1371600	79.4184	56.0672	37.1992	23.3858	10.5937	16.1503	15.3021	21.2048
PF3D7_1371500	33.1487	16.0204	12.619	8.42133	33.7892	44.1752	50.9953	52.259
PF3D7_1371300	10.2822	10.663	11.9785	12.5325	12.5151	9.34741	11.4419	10.4379
PF3D7_1371200	2.6744	2.71767	3.32352	2.89077	2.92539	2.93405	2.80422	8.45595
PF3D7_1371000	9.29548	8.03185	9.90133	9.57244	8.55115	8.03185	9.24355	8.72425
PF3D7_1370900	58.8887	46.9794	50.8742	45.1792	28.7866	24.8745	29.8425	33.2526
PF3D7_1370800	73.1522	63.5451	65.2242	57.4173	42.9981	38.8091	55.5132	46.9102
PF3D7_1370500	61.364	52.259	58.3521	49.6451	32.6813	27.2979	37.4762	32.4909
PF3D7_1370300	97.7151	99.7923	99.8788	99.8269	97.5593	92.4182	81.9976	64.7914
PF3D7_1370200	2.6744	2.71767	3.32352	22.5809	2.92539	2.93405	2.80422	2.38878
PF3D7_1370100	20.9711	29.1241	35.8837	22.3559	2.92539	16.2455	2.80422	2.38878
PF3D7_1370000	61.0438	56.5518	45.508	50.6664	2.92539	22.503	12.3161	2.38878
PF3D7_1369900	14.2721	20.1056	35.8837	22.3559	19.7507	2.93405	12.5065	10.6543
PF3D7_1369800	2.6744	19.8113	3.32352	47.6545	19.4478	16.1156	12.3161	2.38878
PF3D7_1369700	61.641	61.5544	62.87	61.416	55.6344	47.1525	41.9076	41.371
PF3D7_1369600	34.8624	41.8729	54.0938	59.0618	62.593	57.4693	63.1989	67.7514
PF3D7_1369500	59.633	78.8645	82.413	81.3225	80.3185	78.1721	71.1269	57.8674
PF3D7_1369400	24.3898	50.1298	57.1577	53.2802	47.066	40.9901	43.5866	42.1672
PF3D7_1369300	20.8932	35.6413	39.2764	37.1992	23.7494	15.4405	11.9958	12.5325
PF3D7_1369200	23.8878	52.6744	58.2136	54.8901	43.777	34.3777	32.889	38.4282
PF3D7_1369100	31.5908	51.8695	54.1977	45.058	44.4175	47.2044	44.331	34.0834
PF3D7_1369000	59.9619	78.1374	71.3865	47.3083	27.3845	42.7211	55.0805	59.9446
PF3D7_1368900	52.1205	60.3081	65.3973	66.9725	72.4944	74.0003	75.5236	75.2294
PF3D7_1368800	32.8717	27.2633	25.1168	20.1142	32.0409	42.9289	54.7516	58.2482
PF3D7_1368700	49.7663	36.5761	36.6453	53.1937	68.9285	72.4251	77.445	75.8871
PF3D7_1368600	25.8092	48.0613	65.8646	77.2027	87.6926	83.5382	76.2333	53.7995
PF3D7_1368500	32.1447	22.9012	29.7386	29.3232	31.9543	28.6654	26.3632	24.6841
PF3D7_1368400	65.9166	62.4546	66.6782	66.0724	64.4798	58.4213	64.376	81.461
PF3D7_1368300	42.8077	50.9607	61.4246	64.9472	60.2216	55.3055	56.0672	55.721
PF3D7_1368200	61.6756	76.5103	82.915	88.3677	87.9522	87.6406	84.8884	77.6181
PF3D7_1368100	76.5795	64.826	67.587	77.722	84.2825	87.606	89.0774	91.1373
PF3D7_1368000	38.8783	25.0389	21.6202	16.0291	34.62	23.1262	27.4191	47.1525
PF3D7_1367900	8.48191	8.2915	9.41665	7.70296	8.93197	14.2461	15.1636	11.2342
PF3D7_1367800	8.68098	6.62974	11.7102	13.1383	10.9746	12.6536	10.5937	7.68565
PF3D7_1367700	70.573	85.2346	86.1001	86.7578	87.6233	86.0308	82.0841	66.8686
PF3D7_1367600	61.9872	73.8792	76.0602	73.9484	79.5396	72.3213	57.4866	38.2205
PF3D7_1367500	49.9567	32.0062	37.7878	31.8504	35.6933	49.5759	60.0485	68.3919
PF3D7_1367400	64.4279	70.9365	72.754	68.1322	64.7222	56.0325	35.4855	23.1435
PF3D7_1367300	24.736	34.62	32.941	35.148	13.9778	10.9919	12.0824	9.6763
PF3D7_1367200	10.3514	14.2808	20.2181	16.3666	12.3074	9.98788	7.5991	7.426
PF3D7_1367100	67.4398	85.6673	86.4116	88.887	87.7791	88.4023	87.2771	82.8111
PF3D7_1367000	69.4305	81.3225	77.4277	84.3517	86.7232	91.7777	92.9202	93.6818
PF3D7_1366900	91.5354	94.5647	95.8975	96.0706	95.7071	94.8589	94.8416	95.0493
PF3D7_1366800	82.2399	68.0111	69.6728	79.0895	84.4556	81.5302	74.5023	58.8887
PF3D7_1366700	65.328	61.2255	61.3294	57.7289	55.5825	47.3948	40.0208	38.7918
PF3D7_1366600	90.0294	84.0921	80.907	83.7286	85.1134	84.6806	81.9283	81.686
PF3D7_1366500	68.1322	62.3507	53.4014	53.938	58.8714	93.7511	96.6245	94.8416
PF3D7_1366400	54.6824	73.1002	74.485	78.1374	80.4224	82.3438	83.7286	77.9124
PF3D7_1366300	71.1269	78.2067	79.7127	83.7805	84.0748	79.6607	71.75	57.5904
PF3D7_1366200	54.3189	35.0355	29.453	35.0009	54.7776	66.2887	68.3053	68.4092
PF3D7_1366100	82.413	58.2309	38.7571	40.09	35.7279	24.3379	15.9425	20.8759
PF3D7_1366000	51.6185	62.6796	64.9818	67.4572	65.7781	56.7423	52.4494	37.2858
PF3D7_1365900	97.8882	97.767	97.542	97.9574	97.7843	97.8536	97.6978	97.6112
PF3D7_1365800	74.537	70.0017	70.3306	74.035	70.9884	62.8873	57.9886	62.4373
PF3D7_1365700	83.6247	73.3599	73.7407	74.987	74.0003	68.8939	70.8153	78.9164
PF3D7_1365600	67.6303	46.0793	34.5681	19.1795	18.1236	17.1369	15.4925	20.7374
PF3D7_1365500	30.6907	33.9796	51.1857	58.4213	66.9898	67.8726	65.7954	50.8915
PF3D7_1365400	18.842	50.9261	62.2642	60.4206	53.9727	39.7092	32.4736	22.8146
PF3D7_1365300	55.2882	66.1935	66.2455	63.3893	61.0524	50.6491	43.2751	46.5467
PF3D7_1365200	27.7826	65.7088	75.1601	82.9669	89.7005	87.0867	83.8324	70.3479
PF3D7_1365100	36.8617	69.4997	74.3812	83.2785	85.2519	85.7192	80.9417	61.3986
PF3D7_1365000	47.014	71.525	74.5889	74.8139	71.3	62.1776	56.6903	60.6024
PF3D7_1364900	11.2688	47.066	53.436	49.749	39.2591	33.8065	34.6374	26.6401
PF3D7_1364800	84.9576	93.6299	93.4568	93.353	92.0547	91.7431	87.5887	68.8073
PF3D7_1364700	11.2342	7.09711	11.2602	9.05314	17.2927	23.9225	22.2953	23.5589
PF3D7_1364600	28.9943	23.3166	20.9105	18.7641	24.1129	32.6467	38.861	56.0499
PF3D7_1364500	40.367	65.3453	68.3573	66.6955	60.3774	56.6038	48.9354	43.0673
PF3D7_1364400	54.7343	63.6316	65.2415	65.9512	64.1683	52.6917	44.2098	43.0154
PF3D7_1364300	66.7821	73.5849	72.5463	72.529	68.79	63.4759	52.2243	48.6585
PF3D7_1364200	69.0324	69.4305	67.6303	62.9219	56.5865	46.7371	46.7717	52.1551
PF3D7_1364100	64.2375	41.1373	32.6813	19.4911	14.2115	26.0516	67.5437	89.5621
PF3D7_1364000	62.0911	59.3214	62.645	56.1537	48.243	38.134	37.2339	60.36
PF3D7_1363800	13.848	11.0784	16.7215	20.2527	20.521	20.7374	23.3079	22.4511
PF3D7_1363700	28.925	25.2726	18.7987	29.2539	44.3137	47.1871	51.1511	48.5719
PF3D7_1363600	15.4232	10.4985	10.914	20.2008	47.7151	55.0459	57.5039	47.3083
PF3D7_1363500	42.7558	21.2134	25.965	44.833	42.548	37.2165	38.3417	55.2017
PF3D7_1363400	53.5918	62.7661	71.4038	71.802	71.9578	72.9098	74.8658	71.2134
PF3D7_1363300	22.78	48.8662	57.2789	59.4772	51.5492	47.5853	46.2524	36.1606
PF3D7_1363200	21.8106	57.6078	65.0684	61.0178	54.6477	52.6052	46.3389	35.1567
PF3D7_1363100	42.6692	55.5825	56.1191	53.7822	47.1698	41.0421	47.4641	52.8475
PF3D7_1363000	46.9967	72.2174	74.4331	68.2188	62.0045	51.8262	37.7878	23.8878
PF3D7_1362900	22.0876	12.7402	10.1437	9.26086	16.4099	14.9905	17.587	19.6123
PF3D7_1362800	60.0138	33.7545	26.7526	19.6988	22.6415	24.6495	24.5889	45.0926
PF3D7_1362700	66.6176	58.9926	54.8208	51.7743	53.1245	66.1762	70.3826	62.8527
PF3D7_1362600	46.4947	44.0194	47.1698	47.5506	31.6947	27.8345	30.5868	32.8717
PF3D7_1362500	28.3192	13.7615	16.9292	11.7708	16.6696	28.501	33.8757	32.6467
PF3D7_1362400	69.6036	74.8832	76.268	73.6715	67.786	59.9965	53.3668	57.0711
PF3D7_1362300	52.8475	72.7194	78.2413	81.409	85.425	84.421	83.9363	75.5409
PF3D7_1362200	58.4213	79.4184	83.2612	86.2732	86.2039	86.9656	82.0322	59.5984
PF3D7_1362100	33.7372	40.0554	42.4961	37.1127	31.1754	23.2387	15.0251	14.3846
PF3D7_1362000	69.1535	42.2538	28.6394	32.5948	28.3884	41.4402	52.3109	63.4759
PF3D7_1361900	75.991	50.7357	46.1312	35.3471	76.5449	93.6645	96.2957	95.8283
PF3D7_1361800	94.3916	77.7047	57.954	45.3003	23.5589	19.5776	27.4018	85.8577
PF3D7_1361700	76.7526	51.757	43.7424	34.8364	32.9583	60.2216	78.6048	85.9443
PF3D7_1361600	40.9728	34.7931	17.8639	18.1322	22.3472	35.399	44.6252	44.279
PF3D7_1361400	89.2851	59.408	40.2371	24.2167	18.3486	25.4111	26.6228	43.2924
PF3D7_1361300	28.4923	33.893	44.3137	38.861	22.4511	17.7082	18.7814	15.2674
PF3D7_1361200	77.8259	83.0016	83.1227	82.6034	79.176	76.5968	75.3505	77.0123
PF3D7_1361100	90.9295	92.8683	93.0068	90.4795	82.188	81.4263	87.4502	92.6086
PF3D7_1361000	29.0116	63.8221	67.8899	72.5636	72.5463	65.7608	42.6173	25.1515
PF3D7_1360900	74.8658	59.633	50.4587	55.721	72.5809	90.4622	94.53	95.0147
PF3D7_1360800	71.0923	79.3318	84.5421	88.2465	89.6313	88.5408	90.3583	91.4835
PF3D7_1360700	72.2693	77.0642	75.0216	71.5596	68.063	65.9339	68.4265	74.7274
PF3D7_1360500	12.4978	17.0677	22.7454	26.4497	22.0357	25.013	24.2687	15.0597
PF3D7_1360400	28.0076	64.2548	71.7154	72.0097	73.3253	70.2441	62.6277	45.6119
PF3D7_1360300	9.36472	24.2254	40.4881	45.6119	37.4243	33.7199	32.2832	29.3578
PF3D7_1360200	57.2616	79.4357	81.4263	83.2266	83.4516	82.1534	80.3531	77.5143
PF3D7_1360100	72.0097	79.7992	77.7047	75.7833	71.1269	73.6541	71.4904	74.4331
PF3D7_1360000	30.7253	37.6147	35.0355	38.4282	48.7796	52.934	54.7343	56.6903
PF3D7_1359900	73.9311	79.3145	81.1321	77.1854	61.139	48.0353	49.1085	68.0457
PF3D7_1359800	66.9205	34.7066	31.9024	34.5854	18.2275	9.59841	7.98858	37.0434
PF3D7_1359700	63.8394	40.7997	29.0635	14.376	12.394	12.7575	14.35	26.9863
PF3D7_1359600	54.5266	34.0142	33.5122	38.1167	73.758	81.4437	77.9297	77.1335
PF3D7_1359500	25.8439	34.1354	34.9316	39.9862	22.9185	27.9557	24.8572	14.9905
PF3D7_1359400	91.3277	95.9321	95.7764	95.6552	92.7298	92.7298	92.3144	92.1932
PF3D7_1359300	47.9315	69.067	73.6022	74.6408	73.5676	66.5917	62.0737	51.757
PF3D7_1359200	46.3389	46.2524	51.9474	54.6824	59.9446	68.1496	73.7407	73.3426
PF3D7_1359100	59.5465	61.8314	64.324	59.7023	60.7236	55.7729	45.2138	42.1153
PF3D7_1359000	62.9046	69.8113	72.6155	69.8806	67.2148	56.3268	42.2538	32.0235
PF3D7_1358900	49.6278	84.7326	88.8177	92.349	88.6446	89.4063	88.7831	81.3917
PF3D7_1358800	92.9721	97.7151	97.9401	98.2344	98.1998	98.4075	98.0267	97.1958
PF3D7_1358700	95.8283	94.8589	95.8802	94.3742	90.3583	91.0334	93.8723	96.6592
PF3D7_1358600	49.6451	40.3497	36.6107	36.5241	27.4018	16.3926	14.1596	17.6389
PF3D7_1358500	25.0303	51.255	61.0871	63.2681	65.6569	60.6716	38.9908	24.1475
PF3D7_1358400	88.9216	58.8887	41.5787	31.911	23.0743	32.3005	33.7892	77.7739
PF3D7_1358300	48.797	26.7613	22.0876	13.4326	16.9638	26.7786	46.8582	62.0564
PF3D7_1358200	58.4733	72.2001	74.7447	70.7288	66.6782	60.1696	58.5944	57.7809
PF3D7_1358100	86.3424	92.0374	93.4914	93.1279	92.5221	90.9815	85.4942	74.9697
PF3D7_1358000	37.0781	36.4895	27.2633	27.3845	18.3659	28.1807	46.9621	63.7874
PF3D7_1357900	20.3912	67.4052	82.6207	91.8124	93.6818	92.8856	86.1174	52.934
PF3D7_1357800	83.3478	94.6685	95.5167	96.0014	96.261	96.1572	95.0666	88.4196
PF3D7_1357700	56.9413	75.7313	80.1281	79.4876	76.9604	68.8246	52.9167	31.2965
PF3D7_1357600	28.4057	25.9391	25.8958	32.8544	43.5693	38.6706	36.5588	41.5267
PF3D7_1357500	55.721	38.9995	45.0753	50.8049	46.7544	41.1459	43.5347	55.3748
PF3D7_1357400	65.0684	41.6825	37.7358	46.3389	64.9645	69.3266	64.7049	65.8646
PF3D7_1357300	2.6744	8.50788	15.1895	2.89077	13.5018	14.852	12.394	11.3467
PF3D7_1357200	27.1075	21.3606	21.6721	36.2818	39.8304	44.0713	49.3682	50.6491
PF3D7_1357100	91.847	97.1785	97.6805	98.0959	98.1132	98.4248	98.044	97.1265
PF3D7_1357000	93.0068	98.0093	98.0786	98.3036	98.1651	98.4767	98.1651	97.5074
PF3D7_1356900	46.5293	66.055	54.3015	50.2683	32.1793	62.9566	82.7246	76.1122
PF3D7_1356800	86.7578	60.6024	48.1911	34.4816	19.6209	19.1622	18.8506	35.5202
PF3D7_1356700	68.4265	59.3041	72.0962	76.3891	77.4624	70.9192	53.8342	46.3736
PF3D7_1356600	50.727	51.705	59.2349	56.5778	46.9448	35.1913	27.5402	34.5854
PF3D7_1356500	19.1103	18.3053	8.77618	7.87606	8.17033	2.93405	2.80422	7.22693
PF3D7_1356400	17.7947	12.0824	10.5072	13.9692	25.3765	31.7293	33.1487	34.8278
PF3D7_1356300	94.8589	79.1934	55.4267	48.9874	65.2761	81.963	89.0601	93.9934
PF3D7_1356200	58.1617	70.7114	79.678	90.7738	94.2877	94.4781	91.1719	73.1002
PF3D7_1356100	79.8338	52.6917	44.5387	35.4163	21.7933	34.0315	60.9659	84.4902
PF3D7_1356000	17.2581	16.8253	21.1182	19.543	15.7521	20.4604	18.3659	14.1942
PF3D7_1355900	46.6765	74.9178	80.4137	77.6701	65.2069	69.8633	73.6888	60.5505
PF3D7_1355800	86.5328	89.7005	87.0175	86.0481	85.5981	89.337	88.3677	80.5262
PF3D7_1355700	67.0936	74.3985	71.2134	76.4584	67.1802	61.0871	48.4161	43.2751
PF3D7_1355600	17.6129	27.9038	36.9223	32.1966	39.0687	37.355	30.8638	23.1954
PF3D7_1355500	58.5944	76.3372	79.5396	75.714	77.0988	79.3665	78.4663	65.9858
PF3D7_1355400	14.1163	19.9844	25.6621	40.1073	29.0635	20.1575	18.3486	10.5937
PF3D7_1355300	47.4814	65.4665	66.8859	58.8541	52.1897	43.3789	36.4203	26.4151
PF3D7_1355200	25.9997	42.2191	45.4561	39.1726	28.8904	22.3299	21.6029	15.4925
PF3D7_1355100	69.4478	47.2737	37.1819	41.8903	59.3907	82.4476	89.839	91.6739
PF3D7_1354900	48.2257	57.5385	63.4412	61.6064	58.8021	48.1651	46.287	53.7476
PF3D7_1354800	22.6242	39.9688	54.4746	53.1245	47.0833	33.6853	28.2326	28.2846
PF3D7_1354700	8.23957	16.9465	19.041	16.4099	22.2001	23.5243	20.322	11.165
PF3D7_1354600	79.3838	85.7365	87.6233	85.1307	86.8098	84.5248	70.6941	42.9115
PF3D7_1354500	65.5531	82.7938	85.5288	91.2238	93.4568	92.7817	90.8949	86.4463
PF3D7_1354400	88.5061	88.3157	88.9562	90.3583	89.9083	89.8044	88.7139	89.4755
PF3D7_1354300	83.2266	91.1026	92.1586	91.57	91.4662	89.112	79.2626	48.3296
PF3D7_1354200	74.26	57.4347	59.3214	60.1004	62.9046	56.223	46.3043	52.3628
PF3D7_1354100	30.3445	19.3266	23.9051	37.7618	43.2231	35.7798	26.8305	18.1755
PF3D7_1354000	14.5923	11.7881	18.5217	13.0604	21.776	15.5963	12.9479	9.93595
PF3D7_1353900	69.6728	78.1721	81.5129	87.4156	90.4622	92.5048	93.353	93.6299
PF3D7_1353800	59.2176	69.7334	70.0364	76.9777	81.2879	87.4675	90.1333	90.4449
PF3D7_1353700	29.6348	30.933	49.7663	70.1662	83.9536	82.7246	64.878	34.8624
PF3D7_1353600	85.9616	76.0083	80.6647	79.3318	82.6034	80.8205	85.3038	93.1799
PF3D7_1353500	18.9199	43.3962	49.749	52.8475	50.6145	48.0526	40.1073	39.0168
PF3D7_1353400	39.9688	66.9898	71.3346	70.0883	60.8447	50.753	44.8156	42.6346
PF3D7_1353300	55.8594	60.135	66.9725	72.3732	71.6981	72.8752	73.2733	77.3412
PF3D7_1353200	97.6458	99.5153	99.5326	98.6152	94.6685	79.0549	63.4759	56.8807
PF3D7_1353100	95.6206	98.3036	98.1824	97.542	95.2571	92.2451	84.7845	52.8735
PF3D7_1353000	93.4568	91.7431	92.1932	91.5527	87.6406	86.7059	90.1679	93.4741
PF3D7_1352900	96.4861	96.2091	92.6086	67.9072	37.0088	24.0263	16.8253	13.2768
PF3D7_1352800	37.3031	58.5944	64.3067	66.8686	67.561	65.7088	62.7488	57.5558
PF3D7_1352700	49.3855	70.296	72.7886	72.0443	69.4651	62.9739	58.681	54.2496
PF3D7_1352600	6.9067	10.0312	12.6017	17.085	11.7189	10.7668	13.398	10.0744
PF3D7_1352500	91.2065	84.5075	89.1466	94.2358	92.5048	95.6033	97.3689	98.9787
PF3D7_1352400	41.094	60.2216	67.059	69.3786	64.2548	53.5399	56.9154	70.6768
PF3D7_1352300	44.1406	57.3827	59.0272	58.0059	45.3003	61.1563	70.0017	61.8141
PF3D7_1352200	83.3651	83.7978	85.148	81.0801	81.6687	72.5117	54.9766	39.3111
PF3D7_1352100	73.758	59.2522	56.9846	57.6424	59.9619	53.7995	35.3124	30.8811
PF3D7_1352000	33.7199	29.6174	43.1539	53.0379	55.167	49.8702	51.8435	59.633
PF3D7_1351900	64.4971	81.184	84.6806	85.5634	82.1014	74.26	76.8219	80.2839
PF3D7_1351700	95.1359	83.4689	62.8527	47.0833	26.4151	21.3086	15.8733	33.1487
PF3D7_1351600	24.5975	32.4736	42.8423	42.046	35.8491	34.1873	26.7786	20.2181
PF3D7_1351500	20.7893	49.1258	55.167	51.1511	44.7291	34.4123	28.7	29.1847
PF3D7_1351400	95.6552	98.7883	98.9268	99.3941	99.273	99.3076	98.9268	98.3382
PF3D7_1351300	9.00121	14.4798	22.4338	14.0904	14.9905	15.856	10.9399	10.9572
PF3D7_1351200	29.479	37.8051	51.203	58.1097	52.6917	53.9207	59.8581	63.4066
PF3D7_1351100	42.323	69.1708	73.7234	77.3239	72.1655	73.4291	73.481	63.3374
PF3D7_1351000	73.8965	76.5276	84.2825	83.9882	82.1707	75.8525	62.7315	54.6824
PF3D7_1350900	21.3952	42.8077	66.6609	69.067	49.0912	36.3684	33.8065	30.3445
PF3D7_1350800	23.0569	20.6855	31.3138	33.7026	16.7907	19.8286	23.6974	24.6322
PF3D7_1350700	25.9304	19.2834	17.7168	40.7824	54.8728	60.7928	55.219	41.0248
PF3D7_1350600	25.8266	31.0542	24.6495	26.5016	17.3966	11.9785	10.2475	9.98788
PF3D7_1350500	67.3014	68.1496	67.4225	67.8553	60.7409	54.3189	49.022	58.3175
PF3D7_1350400	33.3564	24.6668	21.5337	29.6434	37.5974	34.9143	36.0222	46.0793
PF3D7_1350300	65.8127	77.9124	80.6474	74.1388	73.1695	64.9299	60.862	51.0992
PF3D7_1350200	60.914	70.5557	73.5157	74.4158	73.7061	70.0537	71.7674	64.2029
PF3D7_1350100	78.8991	91.4315	92.3663	93.9415	94.4954	93.9415	93.1972	89.1466
PF3D7_1350000	41.5094	55.4613	55.2017	54.0765	56.4307	43.2924	28.4923	26.2074
PF3D7_1349900	34.8797	31.9716	33.166	26.7786	38.8437	55.2363	58.2828	55.5306
PF3D7_1349800	60.9832	74.3812	74.2773	73.2387	68.0284	59.7369	41.2325	29.202
PF3D7_1349700	76.6488	52.6398	41.5267	43.102	54.8208	65.7435	80.457	90.4276
PF3D7_1349600	57.6078	21.8279	31.5042	43.1193	49.6451	52.3628	60.36	71.6289
PF3D7_1349500	70.5557	69.6036	71.6289	66.5917	62.6104	59.3734	65.4838	80.5089
PF3D7_1349400	49.9221	83.694	86.0654	85.0788	78.8298	81.911	73.2387	40.6093
PF3D7_1349300	49.2124	36.4722	39.7438	46.8409	39.1033	30.2579	33.7199	52.9687
PF3D7_1349200	80.0069	89.9948	91.4488	89.8563	89.9256	89.9948	87.2944	76.718
PF3D7_1349100	54.3708	30.4829	25.4111	31.0369	19.4997	19.7507	28.1807	52.2416
PF3D7_1349000	14.376	6.98459	10.7668	8.62039	6.23161	6.17968	11.5112	17.587
PF3D7_1348900	31.1234	48.1911	58.8368	62.3853	61.1217	55.5652	48.8489	48.3642
PF3D7_1348800	11.4592	11.4419	11.5977	10.4899	8.42133	10.7495	10.8361	9.74554
PF3D7_1348700	9.81478	9.29548	16.2368	9.10507	10.7668	8.56846	7.68565	7.14904
PF3D7_1348600	86.377	57.954	40.9382	25.74	11.1996	17.9678	17.31	48.9527
PF3D7_1348500	50.9261	40.869	35.4682	30.2752	42.2711	64.0644	79.9031	81.1148
PF3D7_1348400	30.1541	31.8504	31.8158	35.8664	50.753	52.6571	53.5745	49.1605
PF3D7_1348300	25.212	55.9114	62.7488	62.5238	53.0898	41.7691	34.4816	29.6694
PF3D7_1348200	73.6888	78.0682	80.3185	73.1348	69.6209	66.4186	57.5212	62.5065
PF3D7_1348100	56.0845	28.475	23.3599	15.4405	10.3514	11.7968	26.8998	47.8276
PF3D7_1348000	32.1793	18.1755	17.1715	14.3327	12.0824	9.89268	15.4232	21.9491
PF3D7_1347900	16.0464	11.0351	12.4026	10.8447	26.5709	34.3258	39.5361	36.6107
PF3D7_1347800	21.9318	29.5309	24.9697	17.4831	7.51255	8.89735	10.2822	12.9479
PF3D7_1347700	94.08	93.8896	91.0334	85.4596	77.445	83.2439	80.6993	73.2387
PF3D7_1347600	34.5854	30.7945	25.1515	24.7706	9.34741	10.8188	22.2088	33.2352
PF3D7_1347500	98.0267	98.8575	98.5286	98.0267	97.8709	98.2344	98.2863	96.6072
PF3D7_1347400	35.8144	62.4892	71.8193	68.8073	75.9737	76.2853	70.1402	59.6503
PF3D7_1347300	45.8196	47.3948	54.4054	67.5956	66.0204	47.4814	71.4212	83.3131
PF3D7_1347200	92.297	96.2437	96.5553	97.2477	98.8575	98.8575	98.0959	95.084
PF3D7_1347100	49.4201	30.1108	27.0729	21.4644	29.0808	38.7225	53.3495	59.0099
PF3D7_1347000	22.9012	17.3966	10.6889	9.55513	14.35	25.0303	24.1821	22.9704
PF3D7_1346900	70.9365	41.8903	31.0888	26.9604	16.557	33.1487	57.954	77.947
PF3D7_1346800	15.7608	24.8053	23.8792	16.6955	13.2422	12.3074	16.9638	20.1662
PF3D7_1346700	43.5693	53.2629	55.2536	50.5453	37.6839	28.9597	24.6668	17.3793
PF3D7_1346600	49.8356	33.8584	8.49922	24.4764	34.3604	35.8664	48.7623	68.4958
PF3D7_1346500	55.5998	73.2214	75.7487	70.4172	68.7727	60.3947	50.9088	39.4149
PF3D7_1346400	61.3294	65.0164	69.1362	70.4864	60.5331	59.5465	58.6464	64.1856
PF3D7_1346300	98.546	99.4807	99.4461	98.9614	98.771	98.996	98.771	97.3169
PF3D7_1346200	16.2541	28.9424	44.5041	50.4933	44.781	35.4682	31.3831	25.4111
PF3D7_1346100	81.2186	90.7564	92.6779	94.3396	93.9761	93.6299	94.5993	95.759
PF3D7_1346000	19.6988	17.4658	34.9143	25.5496	22.1049	16.4099	12.2209	13.3806
PF3D7_1345900	57.6251	45.5773	45.8023	46.2178	55.8421	73.481	83.0708	84.6979
PF3D7_1345800	43.3789	68.1322	72.2174	77.947	80.9936	83.0362	76.8911	63.9432
PF3D7_1345700	62.4719	57.5645	60.8793	77.9643	86.4982	91.7085	92.7471	90.1679
PF3D7_1345600	84.923	57.7462	45.4042	36.0222	23.1262	19.9758	21.3086	59.0618
PF3D7_1345500	30.0675	20.3826	22.0876	36.5761	48.5892	47.2391	50.5799	63.9605
PF3D7_1345400	56.4307	41.4748	37.6753	47.8449	64.2202	71.3	79.2107	83.0535
PF3D7_1345300	74.2081	37.1127	33.3478	39.2764	20.8672	28.9943	45.5773	75.6621
PF3D7_1345200	31.7293	18.539	27.246	46.1658	53.6438	54.9593	55.0978	53.9207
PF3D7_1345100	94.2877	90.9122	89.5274	87.606	88.4542	86.2558	84.3517	63.095
PF3D7_1345000	27.6095	37.2339	36.9915	33.443	20.9797	26.3805	30.3272	24.4591
PF3D7_1344900	67.5091	80.3531	84.369	85.5808	82.915	72.1482	60.7755	41.4488
PF3D7_1344800	37.8916	63.1816	67.6476	80.9417	84.5248	88.3677	85.1999	67.4052
PF3D7_1344700	36.7492	57.4866	62.2295	60.8447	49.6798	41.596	39.1726	41.1113
PF3D7_1344600	57.3308	35.5375	32.5602	30.2233	20.0537	28.2153	49.749	52.1032
PF3D7_1344500	48.5546	25.7746	19.4911	10.5158	11.39	21.0836	37.1127	58.1444
PF3D7_1344400	36.7838	21.3433	50.6664	52.8821	47.6545	39.2418	41.3536	41.7172
PF3D7_1344300	89.2159	67.5091	51.2896	46.6332	33.945	26.2074	25.6535	46.3043
PF3D7_1344200	72.3905	85.875	91.0161	91.4835	85.0788	79.8511	88.7658	92.851
PF3D7_1344100	77.7912	61.5718	57.175	60.0138	54.8555	45.6638	35.1913	26.1381
PF3D7_1344000	14.0125	12.3767	14.2288	14.9039	38.8783	44.4521	40.4362	28.7
PF3D7_1343900	49.4374	56.3441	60.6889	57.8501	50.476	41.8037	39.5621	42.8769
PF3D7_1343800	71.7327	46.2351	44.9195	39.363	26.5882	19.093	19.6642	39.7265
PF3D7_1343700	92.5394	91.6393	89.5967	85.7019	79.8165	74.3639	66.3147	71.9924
PF3D7_1343600	21.9145	28.0422	40.5228	43.6645	52.6744	62.3334	57.2442	39.3457
PF3D7_1343500	38.9302	29.3751	13.1902	23.4984	36.9915	46.7544	54.1111	64.5491
PF3D7_1343400	27.9124	58.1444	59.2003	53.1591	35.9702	28.1115	26.5016	27.6181
PF3D7_1343300	67.1975	49.9221	48.7883	58.5425	78.7433	80.0242	80.7513	85.5115
PF3D7_1343200	74.1042	74.0177	82.3092	81.6687	82.9496	81.2532	78.2932	78.8818
PF3D7_1343100	85.7365	59.7715	47.4641	33.8238	24.9091	35.901	63.3893	87.9176
PF3D7_1343000	96.2957	96.8669	97.0573	96.3476	95.3436	97.992	98.996	98.7017
PF3D7_1342900	32.5602	56.4999	63.1816	64.9645	61.7102	52.7783	38.9649	27.2287
PF3D7_1342800	39.1553	48.3988	52.3455	68.6862	88.385	89.5274	76.3545	45.2138
PF3D7_1342700	82.0668	93.0933	93.2491	94.3916	94.4262	93.6818	90.4276	84.7499
PF3D7_1342600	99.221	96.5034	86.6194	68.5477	57.7809	63.147	44.0713	39.2418
PF3D7_1342500	62.0391	40.4535	23.9484	17.9505	7.58179	18.9199	24.1475	17.5177
PF3D7_1342400	79.2626	91.5354	92.7644	93.2664	92.7471	93.4049	92.6086	91.0507
PF3D7_1342300	27.4277	11.4073	12.4026	7.33945	40.6959	44.3742	48.3469	54.8035
PF3D7_1342200	14.1769	18.816	13.5105	23.4205	42.8942	48.8143	38.2551	24.9957
PF3D7_1342100	74.2773	55.1324	49.6105	56.2922	44.6252	46.2351	56.6384	71.3346
PF3D7_1342000	96.6765	98.7537	99.2903	99.498	99.5672	99.3768	99.3076	98.9614
PF3D7_1341900	75.0216	84.0575	88.9043	92.0893	92.9202	93.2491	93.7857	94.0454
PF3D7_1341800	58.906	41.6998	30.7945	30.0502	17.7774	11.0438	17.6389	24.0956
PF3D7_1341700	23.8359	23.6455	36.2385	20.9797	18.9545	9.36472	11.0265	14.073
PF3D7_1341600	31.5389	26.3112	14.0038	25.6015	32.439	36.5761	52.484	60.5331
PF3D7_1341500	73.3945	41.9076	29.0289	22.2434	11.6843	8.91466	11.892	30.0848
PF3D7_1341400	2.6744	46.815	53.6784	48.0699	35.6586	25.8092	34.6547	28.5788
PF3D7_1341300	92.6086	97.7843	98.2863	98.6325	98.9614	99.0133	99.0306	98.8922
PF3D7_1341200	92.574	97.7497	98.3555	98.5113	98.6844	98.3555	97.9228	97.1612
PF3D7_1341100	49.3249	48.771	40.2371	43.6645	22.001	27.6355	37.3723	57.902
PF3D7_1341000	2.6744	2.71767	3.32352	2.89077	2.92539	2.93405	2.80422	2.38878
PF3D7_1340900	93.6645	93.9761	92.7125	93.8203	90.0814	88.8697	87.2079	88.7658
PF3D7_1340800	50.8828	38.7225	51.5319	44.8156	36.6453	36.4549	63.372	79.176
PF3D7_1340700	71.1788	60.36	50.9088	49.8182	48.9008	65.3107	85.5808	92.3317
PF3D7_1340600	58.9406	77.1335	84.4037	88.6619	92.6952	91.6912	85.0961	68.8593
PF3D7_1340500	30.5003	38.9129	48.9527	60.4206	65.9858	51.3588	31.7293	27.973
PF3D7_1340400	6.99325	9.55513	3.32352	7.92799	14.6962	7.78086	6.78553	7.28752
PF3D7_1340300	83.9709	90.8084	92.0201	91.7258	91.6046	88.2119	73.2214	44.9714
PF3D7_1340200	18.4698	47.8968	55.3575	55.2796	46.6505	40.5228	34.8105	36.0222
PF3D7_1340100	44.5733	62.9046	65.0338	64.0471	62.143	52.5878	48.3296	46.2524
PF3D7_1340000	34.9316	62.87	59.0099	54.8382	39.2764	27.4883	23.2127	21.2913
PF3D7_1339900	18.2967	16.3926	15.7002	26.4757	35.2432	35.9875	38.3763	40.9209
PF3D7_1339800	34.3258	23.3858	13.7701	36.7492	50.5106	49.9308	46.5813	57.7289
PF3D7_1339700	59.0099	37.1819	31.9889	43.2404	53.1071	44.9368	58.7156	82.4996
PF3D7_1339600	41.3883	31.8678	42.6519	53.3495	49.247	48.295	51.3588	38.0994
PF3D7_1339500	20.4951	25.0389	20.0017	48.52	57.8501	65.3973	64.2548	44.1925
PF3D7_1339400	82.2745	56.673	42.4442	46.5467	51.3588	61.3121	70.9711	84.8884
PF3D7_1339300	96.3995	93.8376	94.8243	95.5513	94.8589	95.0493	94.5647	92.2797
PF3D7_1339200	50.1991	46.062	3.32352	2.89077	2.92539	2.93405	2.80422	2.38878
PF3D7_1339100	14.2721	2.71767	3.32352	2.89077	19.7507	2.93405	2.80422	14.9472
PF3D7_1339000	18.3227	13.0344	19.6469	16.9638	8.18764	12.3767	6.75956	2.38878
PF3D7_1338900	47.0313	32.7333	24.3379	22.7886	28.6135	42.2711	59.4599	68.4611
PF3D7_1338800	34.897	43.0846	41.9076	40.7651	41.1979	55.9979	53.9727	31.2273
PF3D7_1338700	60.36	37.13	22.7107	36.7838	49.1605	57.4347	70.3133	83.8324
PF3D7_1338600	73.3772	55.5306	41.1805	33.8238	47.8449	65.1203	73.533	76.0083
PF3D7_1338500	15.9945	12.5671	9.07045	10.0744	34.0661	40.8863	38.082	28.1461
PF3D7_1338400	35.399	38.6187	36.8098	27.3498	22.1741	30.4051	30.3618	27.696
PF3D7_1338300	90.8084	95.9841	97.0227	96.8669	97.4381	97.6112	97.5074	96.6419
PF3D7_1338200	94.4435	96.0533	96.9188	97.0054	97.3862	97.04	96.7803	96.1226
PF3D7_1338100	85.6154	78.0855	85.4077	92.799	93.2318	93.3876	94.7551	96.2264
PF3D7_1338000	69.1708	52.4321	50.7357	58.0405	71.6635	76.1987	83.0016	89.8909
PF3D7_1337900	76.1122	81.0455	80.1454	78.951	79.0203	75.3505	70.521	74.2254
PF3D7_1337800	92.7298	84.0402	63.9086	50.1298	31.0196	20.7893	16.5138	16.3407
PF3D7_1337700	75.264	46.8409	32.4563	23.9225	14.3673	12.8787	14.2461	47.014
PF3D7_1337600	13.2768	2.71767	3.32352	2.89077	2.92539	2.93405	21.7241	18.037
PF3D7_1337500	62.6623	81.3744	80.9417	80.5435	68.1842	60.4985	51.705	47.1871
PF3D7_1337400	69.2747	82.8804	83.6074	76.5103	66.7128	65.8819	69.1535	65.2415
PF3D7_1337300	42.6519	65.7262	68.7381	69.6209	69.2055	64.3933	54.5093	41.4056
PF3D7_1337200	20.3393	44.8503	54.8555	62.2295	63.9432	67.5264	61.8141	52.4147
PF3D7_1337100	21.7241	27.0036	20.8845	53.2283	71.2481	77.722	68.9112	38.9043
PF3D7_1337000	11.1303	11.4939	15.2328	45.4561	52.1551	44.3483	31.1927	18.8679
PF3D7_1336900	27.0209	58.5079	64.4625	69.0324	65.3626	57.8328	58.8195	51.705
PF3D7_1336800	65.2761	87.0348	90.5833	91.1026	92.2797	92.5221	89.8736	66.7474
PF3D7_1336700	96.4341	96.7457	96.0187	95.9668	95.5167	96.2437	95.4994	91.3796
PF3D7_1336600	62.2122	54.8814	51.3415	43.4914	60.2648	89.9083	93.076	88.1773
PF3D7_1336500	12.1343	16.5224	3.32352	2.89077	2.92539	2.93405	16.3926	9.76285
PF3D7_1336400	44.6772	45.5254	31.1754	31.0542	26.8478	35.0528	45.8542	52.4321
PF3D7_1336300	16.5657	11.4679	14.6789	32.941	33.8584	31.1234	27.4537	28.4404
PF3D7_1336200	65.6569	50.3549	51.2377	64.5837	86.2732	90.0294	92.574	91.8297
PF3D7_1336100	35.1047	29.1241	13.0431	30.6041	31.6773	31.9716	34.7758	45.7158
PF3D7_1336000	67.2667	74.0869	75.6448	70.1921	66.6263	61.7795	59.5205	58.6117
PF3D7_1335900	22.7973	22.7281	12.7229	14.6183	11.0438	10.3168	16.808	16.6696
PF3D7_1335800	44.7983	22.9185	14.5145	38.0647	51.9474	51.2896	55.9287	63.6836
PF3D7_1335700	44.7291	27.0383	35.624	46.9448	50.5799	52.5186	57.3308	64.8607
PF3D7_1335600	41.8556	59.6676	62.6277	57.7635	48.2603	39.4149	36.8011	54.3015
PF3D7_1335500	29.3578	15.0078	9.36472	10.9053	6.16237	8.20495	5.8681	8.18764
PF3D7_1335400	92.9202	79.4876	59.7715	46.7198	28.4231	23.9917	18.1409	16.6003
PF3D7_1335300	89.8563	74.4331	54.6304	41.3536	22.5723	20.1142	14.2635	13.8134
PF3D7_1335200	76.0083	62.368	49.6278	18.4352	8.51653	9.08776	7.65103	10.0225
PF3D7_1335100	99.3941	94.7551	83.7978	64.2894	40.4362	43.8117	75.8179	98.1132
PF3D7_1335000	94.4262	82.0322	59.8754	44.7637	35.5721	26.5709	23.3858	31.5389
PF3D7_1334900	76.8219	37.8743	42.4788	2.89077	2.92539	20.3566	22.5896	76.3805
PF3D7_1334800	66.1416	62.5584	58.0578	61.866	56.7076	64.1509	86.1866	93.6472
PF3D7_1334700	89.0601	92.7471	92.3836	84.8018	68.0976	70.1575	75.8439	60.2216
PF3D7_1334600	58.0232	45.8716	33.9882	25.7054	20.8413	24.2167	45.3869	83.7286
PF3D7_1334500	14.35	12.5498	12.342	21.2567	55.3401	76.9257	77.3931	44.8503
PF3D7_1334400	17.0158	10.3514	9.59841	8.74156	17.7428	12.8267	18.8679	20.6162
PF3D7_1334300	47.4987	39.8304	40.618	53.8169	89.0254	91.4315	83.2958	54.5266
PF3D7_1334200	46.8582	77.3239	85.7539	87.7445	92.1759	90.6526	86.3251	60.1004
PF3D7_1334100	34.1786	27.0556	27.6441	40.3843	44.2098	53.0898	66.5743	63.2508
PF3D7_1334000	29.7386	23.5589	17.2062	19.82	22.4165	28.7173	39.64	46.4082
PF3D7_1333900	25.3938	20.0277	16.8773	11.9266	29.3924	37.9263	46.3909	53.1937
PF3D7_1333800	77.3758	79.5396	82.188	85.927	83.5035	85.5288	83.14	62.4026
PF3D7_1333700	91.7777	72.806	58.4559	64.7568	76.3372	82.8804	82.9496	89.614
PF3D7_1333600	71.7847	83.6766	84.4383	86.2212	84.7153	80.1281	60.5505	33.7545
PF3D7_1333500	20.0883	24.5889	19.7594	20.6682	50.0087	58.9406	56.2056	35.2951
PF3D7_1333400	57.1058	77.1162	82.8631	83.0016	80.457	77.7566	75.2294	78.1894
PF3D7_1333300	45.9408	66.7994	72.4598	73.5503	72.0097	71.075	75.714	79.5915
PF3D7_1333200	45.058	42.0287	56.9154	62.0218	65.6742	64.4798	71.5077	72.6155
PF3D7_1333100	12.8613	15.4752	18.816	20.0104	21.9058	20.8499	19.8892	17.7255
PF3D7_1333000	51.1165	64.0125	67.2321	86.9482	91.6566	93.2145	92.297	84.8537
PF3D7_1332900	49.9913	80.0762	87.381	88.7831	89.8736	89.6313	88.5061	78.8125
PF3D7_1332800	78.9683	90.5487	89.6832	92.1066	91.345	91.0853	86.1347	66.5743
PF3D7_1332700	69.5517	83.9536	84.3517	83.5555	83.0708	79.955	71.5423	47.1698
PF3D7_1332600	72.5982	50.6318	46.0273	38.5494	58.0145	75.3678	84.1959	87.1906
PF3D7_1332500	65.9512	85.2172	88.1946	85.4077	77.9643	65.605	48.2603	38.7139
PF3D7_1332400	58.2309	63.0777	67.7168	69.8633	66.8686	59.1137	50.4241	44.781
PF3D7_1332300	70.0017	58.404	66.609	67.336	61.641	68.0457	73.8099	72.2174
PF3D7_1332200	95.2224	81.686	61.0698	49.5759	27.0902	26.5363	18.5217	45.4042
PF3D7_1332100	20.7201	34.3777	40.5574	38.3071	26.7094	20.8759	20.3912	16.9811
PF3D7_1332000	85.7885	81.963	81.2013	82.4823	77.3066	78.1201	74.6581	75.2986
PF3D7_1331900	49.0999	72.4771	77.947	75.8525	71.75	62.2468	51.3935	40.5574
PF3D7_1331800	95.8629	98.5286	99.0133	99.2903	99.4115	99.4115	99.3595	98.8056
PF3D7_1331700	50.3375	73.7926	80.5955	87.6233	84.1959	79.3838	72.1828	70.573
PF3D7_1331600	59.4945	33.9623	34.1181	23.0396	33.6161	51.203	84.4729	92.3836
PF3D7_1331500	87.7791	64.5491	49.9394	40.3324	49.749	46.4601	43.9761	33.1314
PF3D7_1331400	17.6389	13.8134	11.8574	18.1755	10.0052	13.7095	10.1783	14.4539
PF3D7_1331300	77.6008	57.6597	47.4987	43.0846	54.3881	83.3651	90.5314	94.6858
PF3D7_1331200	73.5849	80.2666	84.6114	83.0535	85.3038	82.2745	79.5915	65.5011
PF3D7_1331100	78.3452	64.0817	65.5184	67.9418	62.5238	52.9514	41.821	44.1579
PF3D7_1331000	74.5196	53.436	42.7211	40.7478	30.6907	22.9012	26.242	30.2752
PF3D7_1330900	43.2404	58.9233	57.2269	52.8215	45.9062	30.2406	25.2207	31.3138
PF3D7_1330800	96.763	97.3169	97.2304	97.0746	98.0093	98.0093	96.9881	92.9202
PF3D7_1330700	37.3896	26.3285	22.8579	18.8852	36.8357	46.6851	66.2801	76.8219
PF3D7_1330600	39.8131	35.1913	35.5721	33.9623	47.4554	72.6848	78.8298	71.75
PF3D7_1330500	66.3407	55.0978	52.5878	49.472	32.162	35.122	60.3774	75.766
PF3D7_1330300	49.1432	47.1006	55.5046	67.9591	77.9297	79.2107	77.8432	75.8352
PF3D7_1330200	63.4066	58.0232	55.7989	66.4532	56.7942	72.0443	86.3597	89.1812
PF3D7_1330100	68.8766	60.637	63.0431	71.1442	72.5636	84.6287	91.6912	92.8337
PF3D7_1329900	28.0249	17.2235	17.0331	28.1634	40.3497	36.4895	27.9903	21.7414
PF3D7_1329800	37.9436	19.768	7.86741	10.4379	31.7379	30.5176	28.1288	19.1449
PF3D7_1329700	78.6394	55.8941	42.7904	33.5295	17.6562	17.5177	18.2275	19.2834
PF3D7_1329600	88.7658	89.6659	90.0294	87.3637	85.6327	82.0668	81.1148	70.7461
PF3D7_1329500	93.6299	96.0879	96.1226	94.7204	80.5089	74.7274	76.3199	59.5292
PF3D7_1329400	28.7693	66.4532	64.6356	69.1708	70.7807	75.5929	67.4225	44.1059
PF3D7_1329300	49.0047	52.2243	47.6891	48.3988	35.5548	46.9102	67.8034	76.7873
PF3D7_1329200	28.3365	34.0661	35.5894	31.0196	24.7187	32.7506	45.4734	53.1245
PF3D7_1329100	63.0258	49.5413	54.5958	69.3093	77.2027	72.3905	66.7648	71.8539
PF3D7_1329000	52.8821	75.2294	76.2506	75.766	70.2441	64.7395	53.6091	36.2472
PF3D7_1328900	39.4495	50.476	57.677	61.5025	58.9579	56.5692	56.4653	51.9647
PF3D7_1328700	41.0074	46.564	53.4533	50.1471	44.1752	27.973	23.6628	27.0902
PF3D7_1328600	37.5281	35.1653	41.2671	42.5307	24.9264	21.3433	18.6948	13.6057
PF3D7_1328500	69.9498	66.4012	74.1561	74.7101	69.5863	62.0218	58.906	57.2096
PF3D7_1328400	35.7798	43.6386	53.5745	59.5292	74.0523	75.0043	71.5769	50.5453
PF3D7_1328300	93.1799	76.0429	69.344	80.1454	78.8472	79.4184	88.0907	93.3703
PF3D7_1328200	44.1059	25.6015	21.499	18.3313	25.8092	30.6214	39.4322	53.5572
PF3D7_1328100	82.6727	87.9695	90.064	93.2491	94.0973	95.1705	96.0879	96.7803
PF3D7_1328000	17.2062	13.3114	10.3514	11.0611	21.7068	31.0369	38.5494	43.0327
PF3D7_1327900	2.6744	15.8387	14.3327	9.20893	2.92539	10.8188	9.97057	6.66436
PF3D7_1327800	56.1364	76.5449	78.6394	78.6914	77.3239	76.0602	69.5517	55.8941
PF3D7_1327700	54.3448	78.7087	81.7379	75.8179	69.9152	67.2841	60.4293	43.0846
PF3D7_1327600	84.0921	60.4812	55.0113	53.9553	59.0964	50.3895	38.7225	30.6474
PF3D7_1327500	53.6611	24.3033	15.7694	8.36074	7.82413	10.6803	19.3526	38.2725
PF3D7_1327400	80.0589	52.8302	44.7291	43.7597	49.6105	60.0658	76.8565	87.6233
PF3D7_1327300	96.9534	87.5195	70.6249	62.3334	73.0483	64.826	51.2204	41.5614
PF3D7_1327200	48.3469	75.2467	81.5475	78.8645	72.8579	67.0936	63.2162	42.2538
PF3D7_1327100	10.7582	31.937	40.09	33.9103	22.3472	16.7734	22.2261	16.0464
PF3D7_1327000	23.0223	56.1191	65.5357	66.5051	67.5091	62.2815	56.6038	40.1939
PF3D7_1326900	57.6424	62.1084	67.9591	62.1776	59.3214	47.4987	38.359	31.2792
PF3D7_1326800	33.1833	41.3363	54.1631	51.8262	42.3922	33.668	33.9623	41.6479
PF3D7_1326700	58.6464	53.7995	55.8941	55.4094	58.8195	48.7104	38.1513	34.5508
PF3D7_1326600	36.4549	27.696	25.1861	17.9332	36.8011	48.6931	55.8248	55.444
PF3D7_1326500	26.6228	21.0317	29.9117	25.4977	25.2034	29.5136	33.9969	32.4217
PF3D7_1326400	46.1485	76.1295	79.7819	80.0415	76.3026	74.3465	71.1788	59.7715
PF3D7_1326300	79.0029	90.6526	90.4795	91.1719	90.0467	89.6659	89.8217	87.4156
PF3D7_1326200	33.6507	50.0519	54.3189	55.7556	52.1032	45.058	45.9062	45.4215
PF3D7_1326100	68.9458	58.4906	65.8819	73.2214	76.6488	77.497	80.3185	67.059
PF3D7_1326000	72.4944	45.1445	31.3485	37.1646	37.5627	43.9675	61.0005	78.2759
PF3D7_1325900	39.64	25.4977	24.3725	17.4485	11.9266	22.6242	41.6998	63.1123
PF3D7_1325800	15.9425	22.3732	43.552	53.3668	70.2268	68.2534	37.7532	22.053
PF3D7_1325700	28.0942	14.575	28.6394	34.1786	59.6503	59.2349	65.38	62.8354
PF3D7_1325600	76.8738	44.0973	31.7639	24.4071	42.3749	46.9794	63.4066	85.6327
PF3D7_1325500	18.3832	14.7654	13.6057	10.8707	41.3017	49.0393	39.4149	27.748
PF3D7_1325400	66.3407	39.1207	35.1567	26.0689	20.1835	24.009	44.4002	74.7447
PF3D7_1325300	10.5245	13.6663	10.1783	12.1776	20.2527	17.3966	17.1889	12.7229
PF3D7_1325200	34.9489	46.9621	42.8163	39.7611	20.3652	14.8693	13.5537	12.6017
PF3D7_1325100	87.8657	95.8975	96.1052	96.1745	96.4688	96.538	96.3476	94.5993
PF3D7_1325000	76.4064	91.8989	90.6699	93.7511	92.1412	93.7165	93.578	91.1719
PF3D7_1324900	91.795	98.6844	98.7364	99.0826	98.8056	99.7577	99.6884	98.6498
PF3D7_1324800	39.7092	38.7052	48.018	55.4786	56.1364	69.6382	79.7646	75.8525
PF3D7_1324700	76.3026	78.501	72.4944	72.8752	56.8807	57.2096	52.4147	72.5117
PF3D7_1324600	22.9271	24.4244	21.9145	19.4132	30.6041	37.0088	42.046	43.5174
PF3D7_1324500	25.6188	23.1089	16.7388	19.1189	35.0874	47.2737	57.1058	52.5359
PF3D7_1324400	90.3064	93.803	93.9415	88.2292	83.1141	81.7552	82.7592	80.4224
PF3D7_1324300	29.8944	40.2112	37.5281	42.1672	37.3031	43.5866	42.6692	34.0488
PF3D7_1324200	78.726	91.12	91.4315	91.6739	89.4582	88.1946	87.0002	87.2771
PF3D7_1324100	62.9912	29.9117	24.9697	14.1509	37.1819	53.5053	72.3905	79.6088
PF3D7_1324000	30.7426	63.2508	71.3692	74.3639	72.1828	59.7888	45.785	29.4097
PF3D7_1323900	69.2055	87.658	89.5447	89.389	87.5022	83.9882	78.9164	68.842
PF3D7_1323800	32.2832	55.7729	61.866	57.9886	47.4295	36.7146	36.1347	42.8077
PF3D7_1323700	98.4421	91.3623	73.031	60.7236	41.5267	44.5041	77.9124	97.7497
PF3D7_1323600	17.587	19.8546	15.3367	32.0149	53.0033	57.0365	58.2309	56.8634
PF3D7_1323500	50.5972	70.3999	76.3026	80.0762	76.8046	69.0151	72.0789	77.6528
PF3D7_1323400	92.8163	97.2823	98.4075	98.1824	98.494	98.2517	98.0786	98.4248
PF3D7_1323300	38.9476	23.6801	31.6254	43.2058	38.359	36.7492	51.8781	58.8714
PF3D7_1323200	77.5489	91.2065	92.5567	95.8456	94.8243	94.3742	94.4435	95.4994
PF3D7_1323100	85.65	96.1918	97.3169	97.6112	97.8016	97.6458	97.4035	97.0573
PF3D7_1323000	25.0649	59.1137	50.9953	51.3242	38.0647	27.748	26.9344	19.82
PF3D7_1322900	27.4277	42.9635	34.369	42.6865	25.7919	23.0916	27.2979	25.3765
PF3D7_1322800	24.9611	8.65501	29.1674	2.89077	10.1696	29.7386	37.0434	46.789
PF3D7_1322700	19.6123	17.8726	20.547	19.0064	18.9199	30.6907	34.4296	28.8731
PF3D7_1322600	51.2896	21.3086	17.7601	7.40869	10.7149	11.7102	14.0904	32.3178
PF3D7_1322500	77.0815	50.1644	42.3922	31.8851	22.1222	25.7573	48.9527	82.2226
PF3D7_1322400	27.7999	38.0128	52.2416	58.629	55.1844	41.2325	28.3452	24.4937
PF3D7_1322300	23.1954	25.8266	31.0542	37.3377	42.0114	55.4267	62.2988	52.7609
PF3D7_1322200	51.3935	31.3311	32.7506	44.5733	48.1565	48.9874	53.436	64.601
PF3D7_1322100	75.8179	81.7379	78.9164	72.9098	65.0857	56.5865	41.7172	30.2406
PF3D7_1322000	79.9896	59.0964	38.2032	23.1608	32.3351	49.0739	73.5676	80.7166
PF3D7_1321900	97.1092	91.2411	87.7272	85.425	83.8844	80.5782	78.1548	61.1736
PF3D7_1321800	90.116	90.7738	91.8816	90.2371	90.4968	85.5634	80.8205	83.9709
PF3D7_1321700	88.1946	94.6339	94.9974	94.7551	95.1705	94.9109	94.0107	92.3144
PF3D7_1321600	21.4817	19.1968	14.2721	5.91137	9.6763	7.43465	10.3081	13.398
PF3D7_1321400	87.7964	74.6235	71.9058	67.7341	67.6129	54.7516	50.3722	59.91
PF3D7_1321300	73.6715	73.0829	74.6408	69.794	65.6223	57.3135	51.8262	43.1193
PF3D7_1321200	79.5569	85.8231	86.1174	87.8311	89.4063	88.385	88.0734	89.839
PF3D7_1321100	79.73	49.9048	34.4556	19.3872	12.1516	13.8134	16.8946	56.1018
PF3D7_1321000	8.34343	7.52986	13.346	20.5989	14.2635	16.3407	12.0132	9.22624
PF3D7_1320900	54.5439	82.69	85.5808	84.3344	79.3145	84.9403	82.1014	73.1868
PF3D7_1320800	43.2924	33.5122	32.439	25.3246	48.4508	74.9005	80.6128	69.8633
PF3D7_1320700	74.3119	45.1792	36.5068	27.6095	21.6721	29.3578	35.1567	67.8207
PF3D7_1320600	94.305	89.7178	90.3237	90.2891	89.6659	89.389	88.6273	85.2346
PF3D7_1320500	42.8942	50.2164	70.1229	77.5143	76.1641	73.533	74.3812	70.1575
PF3D7_1320400	21.3779	40.1246	62.0045	62.5584	62.4199	62.2988	58.0924	47.2217
PF3D7_1320300	29.4963	36.4549	59.1483	58.1444	58.5771	55.3921	53.7995	45.508
PF3D7_1320200	26.4843	20.045	22.5982	20.1662	40.4881	39.2591	38.584	42.2191
PF3D7_1320100	51.982	42.0114	27.6268	25.2034	46.7198	67.4572	80.4224	84.9403
PF3D7_1320000	78.4836	81.1494	84.0228	79.5742	62.9392	48.3815	51.1165	54.0592
PF3D7_1319900	9.31279	10.8707	13.5711	12.4632	20.5989	21.7933	20.8932	16.8253
PF3D7_1319800	48.4421	51.8089	54.8035	49.9048	31.6081	21.1875	24.2167	24.2513
PF3D7_1319700	20.1316	12.7921	23.0916	18.6429	18.8506	30.4656	32.5948	33.4603
PF3D7_1319600	30.8292	27.6614	28.7173	26.5536	19.8719	12.8527	15.2674	23.0483
PF3D7_1319500	28.9424	25.9391	35.3644	48.6065	64.8433	61.0005	53.0033	48.8662
PF3D7_1319400	72.5809	60.4639	54.5785	56.4134	48.6412	72.5809	86.5501	91.12
PF3D7_1319300	74.3985	84.5248	84.7672	83.7632	82.7765	79.6261	60.6543	40.8863
PF3D7_1319200	16.1849	26.7267	29.6867	23.0569	27.246	19.2834	16.6349	13.2075
PF3D7_1319100	74.6408	81.2013	82.7419	71.3519	53.5226	43.4482	42.7038	48.2257
PF3D7_1319000	22.0357	27.8605	29.7213	35.4855	25.8612	30.7772	30.7772	28.8385
PF3D7_1318900	24.7187	24.9264	22.278	25.0822	16.4099	11.5631	8.1184	8.48191
PF3D7_1318800	89.5967	86.1174	84.0921	83.8844	86.9829	85.2346	83.7805	84.6114
PF3D7_1318700	78.501	52.3801	39.6919	27.9038	24.8572	19.7334	9.93595	17.6216
PF3D7_1318600	29.6001	26.0689	25.0909	25.3765	21.6202	27.0902	30.8984	38.4109
PF3D7_1318500	24.511	19.3526	21.3259	21.4125	13.7268	21.8106	21.8626	23.9225
PF3D7_1318400	70.1402	50.1125	48.0872	51.6877	56.8115	72.4944	84.646	88.9389
PF3D7_1318300	22.2607	22.1222	38.6706	48.8316	48.6758	38.6187	30.4137	29.6174
PF3D7_1318200	14.4366	11.2688	8.72425	9.27817	12.8008	19.9065	24.3725	17.812
PF3D7_1318100	55.4613	44.1406	44.5733	50.3722	65.83	75.9044	83.4516	86.7578
PF3D7_1318000	74.9005	46.3389	25.8439	10.2995	11.0092	7.78086	10.7236	45.56
PF3D7_1317900	62.3507	77.3931	80.7513	75.3505	74.6235	60.6197	42.2018	26.3459
PF3D7_1317800	96.1226	98.7364	99.0306	99.2037	99.0479	98.8056	98.5286	98.1305
PF3D7_1317700	62.7402	73.3945	78.2759	75.5582	81.7206	76.995	68.3227	59.685
PF3D7_1317600	28.5962	22.9444	34.7931	44.9022	48.9354	55.7383	58.1271	59.0964
PF3D7_1317500	42.4788	38.4802	40.2371	44.2704	63.1989	77.7047	84.2652	82.3611
PF3D7_1317400	37.3204	49.8702	70.0883	83.1227	89.5274	89.5967	89.2505	83.2785
PF3D7_1317300	58.1444	66.7128	81.8072	87.9522	89.4409	89.7698	91.7431	90.0467
PF3D7_1317200	15.6483	17.7687	35.2951	67.0763	71.4731	54.9939	34.4643	25.2034
PF3D7_1317100	73.8272	50.8222	41.4748	36.351	54.2496	83.2785	91.5527	93.2837
PF3D7_1317000	65.5877	72.252	76.5276	79.2107	77.7047	74.1388	75.6275	76.3199
PF3D7_1316900	64.9645	70.4864	72.252	73.4464	74.3292	70.7634	66.0724	64.9126
PF3D7_1316800	51.9128	70.798	74.5716	73.8446	71.4212	69.292	75.3851	79.0895
PF3D7_1316700	21.7068	18.5563	12.3074	12.0045	10.6457	6.96728	8.25688	10.1956
PF3D7_1316600	85.2346	58.681	48.3469	68.0284	68.4611	68.0976	69.6036	78.6914
PF3D7_1316500	48.3296	72.2867	72.8233	72.252	70.573	68.1322	63.6316	46.564
PF3D7_1316400	10.4033	8.73291	8.44729	2.89077	17.4312	15.9252	19.3353	12.2901
PF3D7_1316300	16.9032	18.8506	41.9855	31.911	10.5678	14.1163	11.0438	2.38878
PF3D7_1316200	90.9642	69.7767	57.1404	48.8835	49.4201	45.283	33.2006	28.0422
PF3D7_1316100	58.9926	70.4691	73.983	70.6249	63.1123	56.898	64.7914	74.1215
PF3D7_1316000	26.7267	38.4282	40.4362	35.7279	25.5669	17.3793	17.9505	13.9173
PF3D7_1315900	71.3692	78.0336	80.0069	77.0296	79.8684	77.3758	73.6541	75.3678
PF3D7_1315800	37.3723	48.6065	54.492	58.3002	55.0978	47.6026	42.1153	49.1951
PF3D7_1315700	49.749	68.34	80.0935	83.1573	80.8724	74.8312	63.095	60.4639
PF3D7_1315600	64.3587	47.6199	56.223	62.5757	60.9746	67.1975	80.232	86.1001
PF3D7_1315500	81.6341	70.1575	72.7194	79.7819	85.8923	81.3744	75.0736	72.304
PF3D7_1315400	92.1586	91.1546	92.4875	92.2797	93.5953	92.1066	91.6046	91.345
PF3D7_1315300	59.3907	30.6214	23.4032	10.3514	11.0611	17.1889	29.4617	61.6583
PF3D7_1315200	23.2301	11.5977	8.12706	22.8406	37.8224	34.2046	28.925	22.4338
PF3D7_1315100	48.2603	52.5705	46.7024	44.2963	41.6306	27.8691	20.1142	17.2321
PF3D7_1315000	83.4689	80.8205	81.8764	78.4317	76.1814	63.2162	62.1257	59.3907
PF3D7_1314900	57.3654	84.2479	84.1613	87.3464	83.0535	85.2519	83.5901	67.6129
PF3D7_1314800	2.6744	29.3405	33.8411	29.9204	2.92539	15.0251	6.92401	6.24892
PF3D7_1314700	41.7864	42.4615	40.3497	47.014	68.7554	77.8086	76.493	68.8939
PF3D7_1314600	14.2288	43.9501	52.934	52.7609	54.6997	47.5333	35.2432	27.8691
PF3D7_1314500	43.8636	61.3813	65.7608	67.3014	69.9325	62.8527	72.9791	79.9031
PF3D7_1314400	27.0556	34.5854	49.5932	44.4002	53.3495	36.2472	30.6041	27.7133
PF3D7_1314300	27.2287	20.3826	27.8864	32.9929	42.9289	46.4428	49.3855	40.1419
PF3D7_1314200	18.3659	13.8653	16.7042	10.5764	25.0303	37.9609	46.6678	41.3017
PF3D7_1314100	17.1023	46.512	58.2655	57.0192	61.7275	57.6943	47.0833	35.7971
PF3D7_1314000	16.4272	13.398	15.7867	14.5577	33.9796	36.0048	39.363	36.2991
PF3D7_1313900	15.3021	46.4082	59.91	59.0358	54.5266	46.1485	39.8304	35.6586
PF3D7_1313800	83.9882	83.6247	82.9669	80.0589	71.4558	62.645	53.5399	43.4135
PF3D7_1313700	28.977	33.8411	45.56	49.0826	44.8849	44.5906	39.588	37.9955
PF3D7_1313600	55.0286	24.736	19.9585	17.4312	7.99723	9.62437	9.81478	38.6533
PF3D7_1313500	63.0604	31.4523	19.1622	12.9825	10.4726	11.3034	14.4366	34.0315
PF3D7_1313400	56.9154	30.7426	37.6493	47.5333	52.3628	53.5226	48.3815	44.6599
PF3D7_1313300	38.0994	34.5508	36.8963	32.4217	38.8264	37.5801	34.1527	30.2579
PF3D7_1313200	11.9612	13.2075	35.2432	42.6	42.6692	36.7665	36.4722	40.8517
PF3D7_1313100	8.04916	5.60845	6.71629	8.5425	10.8447	10.5245	10.4379	9.72823
PF3D7_1313000	68.4784	57.5645	61.4246	75.6967	80.5262	85.9096	90.1506	93.4222
PF3D7_1312900	87.4329	83.4343	86.152	87.2598	86.9136	84.646	83.919	85.2865
PF3D7_1312800	82.8977	58.906	45.9408	35.8837	28.6481	40.2977	46.512	65.9166
PF3D7_1312700	37.9782	30.1887	30.5003	45.0234	72.3905	77.5143	68.3919	42.0807
PF3D7_1312600	79.1414	53.4187	41.5094	37.857	23.8619	42.9462	75.9737	83.9536
PF3D7_1312500	90.7564	76.5622	53.7649	43.9328	20.521	19.7161	20.4778	27.0729
PF3D7_1312400	11.113	8.44729	7.96261	7.9453	22.5896	25.7746	24.286	18.2967
PF3D7_1312300	22.8838	14.5318	17.7168	11.9006	27.5922	35.8317	37.632	39.4495
PF3D7_1312200	30.3964	13.0085	15.5271	2.89077	32.2486	35.3471	34.5681	40.2112
PF3D7_1312100	49.3509	28.1807	24.7014	20.6509	17.587	25.1168	39.0168	64.4798
PF3D7_1312000	15.1636	11.1823	17.059	13.3374	2.92539	2.93405	20.5297	23.6109
PF3D7_1311900	80.18	88.0042	90.2371	93.0414	92.2278	92.072	92.2278	93.1972
PF3D7_1311800	90.1506	93.0587	94.8416	95.6033	96.2437	95.5686	94.3223	88.4715
PF3D7_1311700	53.6784	83.1054	86.2558	84.5421	84.0228	86.1347	77.5143	48.52
PF3D7_1311600	75.6275	71.1442	74.035	68.4958	62.0737	49.2124	38.5667	48.6931
PF3D7_1311500	92.5567	91.0853	88.5927	92.072	91.2757	93.0587	94.4954	96.1745
PF3D7_1311400	59.3561	71.1961	76.216	79.3491	77.6528	77.8259	81.8764	83.7805
PF3D7_1311300	40.2112	36.6799	34.7066	48.5027	46.4861	62.4199	66.6609	63.0604
PF3D7_1311200	29.1501	37.5801	58.7329	61.2255	63.147	56.8288	50.5106	49.2124
PF3D7_1311100	41.6652	68.3053	68.5823	59.5465	43.7597	28.5615	19.1103	14.8174
PF3D7_1311000	35.7625	63.4932	66.9552	62.4546	58.1097	41.7345	37.1127	28.1288
PF3D7_1310900	34.0142	54.6131	53.4187	61.3986	55.0286	62.4546	52.3801	51.6877
PF3D7_1310800	30.9676	61.9699	65.0511	66.0204	64.6876	58.1963	39.3457	31.9716
PF3D7_1310700	99.6538	97.8016	89.8477	75.3332	48.4334	56.6817	25.8439	65.6915
PF3D7_1310600	91.1892	64.3067	48.5979	54.6651	78.6394	76.8565	69.9498	84.871
PF3D7_1310500	48.8143	71.2307	77.0988	76.4237	76.8738	73.0483	75.6448	75.7313
PF3D7_1310400	76.3718	69.2574	68.79	72.3905	73.0656	67.4052	55.1324	38.1686
PF3D7_1310300	77.7393	61.8833	52.484	51.5146	43.102	39.9862	31.6341	29.0116
PF3D7_1310200	85.8058	51.8695	34.395	26.017	16.4965	13.8394	14.7049	54.717
PF3D7_1310100	16.6349	13.121	13.9173	12.7402	30.4137	37.8224	38.636	27.4883
PF3D7_1310000	23.2993	6.88939	23.2993	9.43396	27.973	32.3871	30.8465	34.7412
PF3D7_1309900	10.4726	13.6057	8.4646	11.3121	24.0263	37.6493	38.4629	26.969
PF3D7_1309800	32.5948	28.7693	30.8984	31.7466	63.7182	82.7592	82.0668	54.8382
PF3D7_1309700	24.4244	53.488	57.5385	60.2043	49.2989	40.1073	33.1833	32.7938
PF3D7_1309600	29.4097	63.5278	64.2375	61.5198	51.6791	49.0047	45.8889	33.4949
PF3D7_1309500	55.0113	80.3012	83.8844	82.3265	77.4797	75.1774	69.7421	57.5212
PF3D7_1309400	62.5757	57.7982	60.4812	67.8899	63.9605	67.5956	72.2174	78.8991
PF3D7_1309300	77.8778	89.4409	90.7218	88.9216	83.4689	79.2626	77.0815	77.722
PF3D7_1309200	80.0242	65.2761	67.7687	78.5183	70.6076	69.8806	63.1297	76.8565
PF3D7_1309120	28.9077	52.3109	60.6543	57.7116	56.1883	36.2645	32.3697	32.1966
PF3D7_1309100	96.8496	99.0133	99.3422	99.5499	99.4288	99.5153	99.3249	99.0826
PF3D7_1309000	59.3041	82.2053	84.9403	84.3864	86.6367	85.148	82.3784	74.537
PF3D7_1308900	38.8956	68.7381	77.7393	79.7127	68.2188	61.2082	58.3694	59.2695
PF3D7_1308800	60.637	46.7544	40.0208	43.9848	50.2164	63.6836	80.3012	87.3118
PF3D7_1308700	63.5105	43.102	39.3543	37.9955	57.4866	68.79	71.7154	76.5276
PF3D7_1308600	11.5458	9.39934	7.33945	9.60706	30.3272	31.1754	28.0595	23.0223
PF3D7_1308500	60.5678	44.556	39.7265	34.1786	45.56	50.0433	52.2416	43.9155
PF3D7_1308400	43.5866	52.0685	59.0445	61.5371	61.4506	57.3654	57.6078	64.9818
PF3D7_1308300	89.4409	96.2264	96.538	96.9881	97.04	97.1612	96.4861	95.8975
PF3D7_1308200	85.5288	92.5048	94.2531	94.6166	95.6552	94.6858	92.9721	87.0694
PF3D7_1308100	55.1151	38.5667	16.9292	21.3779	57.8847	78.3971	83.3131	80.5782
PF3D7_1308000	95.032	74.0523	56.673	45.1445	26.1381	26.7094	44.9887	90.6007
PF3D7_1307900	81.3398	48.8489	35.7452	24.511	17.8639	19.9411	24.9957	78.3798
PF3D7_1307800	55.9287	76.1468	85.1999	86.6713	89.5447	88.6792	86.654	74.3812
PF3D7_1307700	74.5716	61.0178	59.9965	60.3081	52.3974	40.5747	38.0128	48.5373
PF3D7_1307600	72.0443	57.6251	48.3296	54.44	49.5759	51.5146	59.3388	71.3865
PF3D7_1307500	95.6898	78.3625	57.0798	45.5427	31.5908	28.2326	18.8333	33.0968
PF3D7_1307400	27.7133	8.30881	13.1383	6.33547	9.61572	8.86273	8.58577	8.04916
PF3D7_1307300	14.7828	46.3216	54.7689	55.5306	53.2456	47.8795	43.327	34.2046
PF3D7_1307200	59.0272	74.1908	79.1068	79.9377	81.1667	80.6128	82.413	85.7885
PF3D7_1307100	70.2095	82.8631	84.8191	83.4862	80.8378	77.999	71.2827	50.5106
PF3D7_1307000	64.0644	75.0216	75.0736	74.4331	72.6675	72.1655	75.5756	60.3427
PF3D7_1306900	53.3149	68.5477	66.5917	66.6436	63.6143	56.6211	50.7703	48.745
PF3D7_1306800	73.481	73.1348	74.1215	74.1561	76.1295	73.1002	66.5051	70.4345
PF3D7_1306700	22.2174	20.1056	25.8958	11.7016	17.4139	35.5548	42.3057	33.6161
PF3D7_1306600	37.3377	53.9553	60.3427	63.4759	61.9353	57.175	49.9394	58.4906
PF3D7_1306500	15.8733	17.6043	22.7973	25.965	23.6368	19.8027	15.9772	12.0305
PF3D7_1306400	87.5541	79.955	83.7632	90.0121	91.2411	92.3144	94.08	96.0706
PF3D7_1306300	11.9266	10.7841	9.45127	9.29548	38.7745	42.3403	40.5055	28.0769
PF3D7_1306200	42.6173	23.5936	20.2008	13.9519	26.9863	47.4295	75.5409	85.9616
PF3D7_1306100	34.7239	2.71767	10.2302	18.5737	26.1208	33.4603	41.1286	46.512
PF3D7_1306000	44.0886	20.7201	16.0983	8.44729	10.3687	9.89268	17.2408	43.3616
PF3D7_1305900	48.1738	45.508	56.3961	63.1989	78.6567	79.678	67.3706	50.0087
PF3D7_1305800	16.9032	8.10975	14.2721	20.3912	9.3301	15.9079	12.117	11.1303
PF3D7_1305700	12.0911	22.3299	14.6097	36.1433	55.444	59.0445	38.2898	24.5975
PF3D7_1305600	38.6014	34.4296	27.2114	29.7905	36.2299	51.6358	72.3213	76.0429
PF3D7_1305500	15.856	37.9782	48.8662	48.1219	46.8929	39.1466	31.5735	26.4497
PF3D7_1305400	26.2939	62.8527	67.2148	66.4186	63.9259	58.5079	53.1418	40.3324
PF3D7_1305300	45.6465	73.4291	77.6008	77.8778	73.2733	71.9058	64.6702	47.066
PF3D7_1305200	18.2794	9.00987	7.64237	8.48191	25.5669	35.1393	35.3471	34.3777
PF3D7_1305100	47.8276	28.6135	23.4984	16.1416	38.7225	48.0872	61.7622	73.7407
PF3D7_1305000	45.6638	28.4404	24.4418	29.0289	42.6519	55.7902	58.8541	62.5757
PF3D7_1304900	66.7128	75.1774	78.951	76.8738	80.6474	79.1414	73.758	69.2747
PF3D7_1304800	26.6747	56.0845	56.9327	55.2796	46.2524	43.6299	30.9849	18.9718
PF3D7_1304700	33.1141	26.3805	28.9683	25.8612	41.3363	41.1286	35.3644	33.0102
PF3D7_1304600	14.3327	12.0305	12.0305	36.5588	52.8821	55.7556	49.6798	35.2086
PF3D7_1304500	40.1073	39.4322	36.2385	48.243	79.3491	87.4502	88.5754	81.6168
PF3D7_1304400	55.9633	70.2614	75.9391	74.5543	72.2347	66.7648	69.3266	75.7833
PF3D7_1304300	33.2958	39.7092	50.3375	48.5892	42.825	33.4083	31.66	26.0516
PF3D7_1304100	59.4772	37.1473	17.4312	26.3632	36.1606	37.7532	42.3749	43.6732
PF3D7_1304000	63.9086	39.6573	29.6434	20.2354	26.2247	41.4229	58.3867	71.8712
PF3D7_1303900	20.2441	32.1447	28.2846	36.2299	15.6136	22.2953	23.9744	23.2301
PF3D7_1303800	26.7786	18.5737	19.82	20.1316	37.8743	50.2683	55.946	52.0512
PF3D7_1303700	46.5467	31.6947	32.0149	28.1894	22.3126	18.1063	28.3711	53.6438
PF3D7_1303600	59.8061	47.9661	52.3974	54.9074	42.046	33.6334	24.9784	38.4629
PF3D7_1303500	86.7059	83.5555	84.8364	78.501	60.1696	55.4094	54.5439	77.6701
PF3D7_1303400	88.4369	89.8909	89.3716	87.7099	87.1387	84.4902	80.6647	74.0696
PF3D7_1303300	35.5894	41.6306	60.7062	62.6796	58.0751	56.6817	48.1911	36.351
PF3D7_1303100	35.8317	28.5962	45.3523	59.7369	68.3573	78.1028	83.1054	76.3805
PF3D7_1303000	53.1071	40.843	50.3895	64.6183	73.5503	79.7992	86.9829	84.1094
PF3D7_1302900	10.1437	12.8613	15.0943	36.8703	47.4987	49.4374	35.399	22.001
PF3D7_1302800	91.0853	95.8456	97.1785	97.49	97.8882	97.49	97.2996	96.4168
PF3D7_1302700	70.798	81.9283	82.1014	82.1707	80.3012	74.3119	53.5918	33.7719
PF3D7_1302600	67.3533	79.0895	78.7433	78.7779	74.2081	71.7327	62.3334	49.5759
PF3D7_1302500	36.4376	57.4693	59.6676	55.1324	46.6332	46.3216	48.5892	43.5866
PF3D7_1302400	21.2654	27.3152	33.8844	30.8465	19.9585	14.5577	17.1715	13.1729
PF3D7_1302300	88.8177	82.5861	77.9643	75.5756	80.1454	86.8963	89.0081	82.413
PF3D7_1302200	68.9804	53.0725	37.4329	7.60775	22.2261	27.2287	24.9091	17.3273
PF3D7_1302100	97.1265	95.2917	89.9775	87.4675	87.9176	96.2783	98.494	99.4288
PF3D7_1302000	94.6339	97.5593	97.5247	97.1092	96.3476	93.9588	84.8018	49.0566
PF3D7_1301900	59.6157	36.8963	35.7106	19.5257	9.95326	18.1236	19.0237	16.358
PF3D7_1301800	71.9924	83.3131	76.4757	60.862	30.0848	18.7468	12.9306	8.1184
PF3D7_1301700	91.4488	97.6458	98.4421	97.7324	92.8856	69.1535	40.8517	28.7693
PF3D7_1301600	98.0786	92.6952	72.4771	54.3362	34.3085	31.435	18.6083	19.3872
PF3D7_1301400	74.0177	95.5859	98.2517	98.5979	96.4514	88.5927	61.9699	33.2872
PF3D7_1301300	21.1355	62.2815	74.2254	74.537	43.6213	34.4643	26.7094	15.2501
PF3D7_1301200	12.844	35.8664	38.5494	35.5894	11.113	6.3874	6.85477	8.41267
PF3D7_1301100	2.6744	2.71767	3.32352	7.27021	2.92539	2.93405	2.80422	2.38878
PF3D7_1254900	2.6744	2.71767	3.32352	2.89077	2.92539	2.93405	2.80422	2.38878
PF3D7_1253900	6.54319	6.76822	10.0744	2.89077	2.92539	2.93405	2.80422	2.38878
PF3D7_1253500	15.3194	12.3594	3.32352	2.89077	2.92539	2.93405	13.7615	20.9971
PF3D7_1253400	8.74156	5.5219	3.32352	2.89077	6.30085	15.5617	20.1316	23.0483
PF3D7_1253200	84.0055	89.5621	90.4622	84.0575	71.3346	62.6277	59.1137	37.1646
PF3D7_1253000	87.1387	90.4795	83.0881	72.5117	67.4745	79.73	86.2385	73.9657
PF3D7_1252900	95.4475	93.2318	88.3504	65.5011	46.9794	37.8397	29.7386	17.1715
PF3D7_1252600	90.4276	91.3969	86.654	72.4078	59.9965	52.3109	47.2391	47.6026
PF3D7_1252500	35.0874	57.9886	57.8414	51.9993	38.4282	29.0462	22.6069	16.6176
PF3D7_1252400	68.2015	43.5001	28.5529	11.4419	7.44331	9.52051	7.66834	7.5991
PF3D7_1252300	95.3436	98.269	98.4248	97.9401	97.2304	96.3822	94.6166	91.7258
PF3D7_1252200	51.3069	39.5707	28.6827	14.7828	6.44798	9.95326	2.80422	15.3713
PF3D7_1252100	85.4942	58.5252	44.3483	30.3964	12.5671	14.6443	17.0504	79.228
PF3D7_1252000	2.6744	2.71767	3.32352	2.89077	2.92539	2.93405	2.80422	2.38878
PF3D7_1251900	14.1163	28.8385	3.32352	22.1309	2.92539	16.1676	12.4373	2.38878
PF3D7_1251800	58.8714	67.9938	71.6635	69.7594	69.7075	63.3547	62.9566	59.3041
PF3D7_1251700	24.8053	33.945	37.0781	48.5719	49.4894	42.323	35.5981	29.5136
PF3D7_1251600	78.6741	84.6633	84.8884	82.7938	80.2146	74.7101	66.1503	49.2297
PF3D7_1251500	72.4251	88.0561	89.389	88.8004	86.5155	81.6168	65.7262	40.0727
PF3D7_1251400	16.9638	42.2884	53.4707	49.7317	45.6985	35.7971	30.0848	23.2474
PF3D7_1251300	64.7568	51.9993	42.5134	44.5387	43.552	74.5196	81.5821	82.8977
PF3D7_1251200	99.1345	94.9282	80.9763	63.4412	41.6133	41.6133	23.784	45.1445
PF3D7_1251100	90.2545	94.9628	95.2397	94.7897	92.8337	91.8989	90.0467	91.9162
PF3D7_1251000	11.39	9.6763	3.32352	33.5988	11.165	7.92799	9.95326	7.39138
PF3D7_1250900	29.7905	56.6038	65.605	62.0045	62.2468	60.3081	53.6264	42.5307
PF3D7_1250800	47.3083	60.6543	65.5531	73.1175	78.224	82.7938	82.4996	73.4637
PF3D7_1250700	56.4653	69.344	68.4958	68.1842	66.609	79.2972	89.4236	90.2891
PF3D7_1250600	40.5747	71.7327	71.4904	64.9126	57.175	55.9287	54.1284	49.9394
PF3D7_1250500	52.8648	58.629	69.5171	75.0216	82.2399	78.8818	80.959	84.2998
PF3D7_1250400	30.8811	34.897	39.9688	37.1473	23.9571	25.9131	40.5574	38.7139
PF3D7_1250300	66.6782	54.5439	50.0779	65.0857	76.6142	81.2706	85.65	89.4236
PF3D7_1250200	82.5169	71.7154	71.6116	71.1615	65.8473	53.488	42.4442	44.1232
PF3D7_1250100	8.20495	8.86273	9.22624	9.46858	5.98927	10.2822	9.19162	6.92401
PF3D7_1250000	73.0829	87.0694	89.1812	90.2198	89.2332	86.654	82.5515	70.3652
PF3D7_1249900	52.7263	74.9524	75.2467	79.2972	81.7899	82.413	81.2532	66.4186
PF3D7_1249800	75.6621	75.4371	76.1468	78.2759	79.3838	75.5063	72.529	74.4504
PF3D7_1249700	11.892	13.1556	13.3806	9.39934	7.73758	10.0398	11.7362	10.4206
PF3D7_1249600	38.0474	29.4097	26.6055	21.274	32.5255	36.8357	41.7518	43.4308
PF3D7_1249500	54.8382	37.355	21.6202	36.905	56.9846	71.3865	83.3651	83.7113
PF3D7_1249400	57.0019	34.0488	30.1973	29.2366	42.7211	48.5719	68.5823	75.0736
PF3D7_1249300	44.1232	61.4333	63.9259	67.0417	66.3666	62.87	66.2455	67.6995
PF3D7_1249200	12.5498	15.4925	18.0197	12.9479	8.49922	13.8653	10.9919	18.0717
PF3D7_1249100	62.9566	87.156	89.2678	90.7045	92.6606	92.4355	90.2718	74.1388
PF3D7_1249000	13.9692	40.1419	49.4547	51.1165	46.1918	36.7319	27.7133	17.4831
PF3D7_1248900	89.8217	86.8617	86.1347	90.5314	90.2891	92.0028	93.2318	95.1186
PF3D7_1248800	21.0663	36.5415	29.3578	36.0048	46.8236	59.633	53.8688	38.7398
PF3D7_1248700	94.7378	95.6725	96.3303	96.0533	95.2051	93.9069	94.0973	95.6379
PF3D7_1248600	50.1125	49.5759	43.7078	47.741	36.9569	41.1979	67.2148	73.8965
PF3D7_1248500	98.1478	95.9148	95.5513	94.7724	96.3822	96.4168	96.7111	96.9534
PF3D7_1248400	26.2593	35.0701	36.7492	39.6919	30.9244	30.431	24.9264	16.5657
PF3D7_1248300	31.1234	15.9079	30.7426	26.6228	40.6353	55.2536	73.3253	76.6315
PF3D7_1248200	72.4771	77.0988	76.6488	76.8565	73.9138	72.8233	63.0777	56.2922
PF3D7_1248100	44.8156	67.2494	74.8312	74.6927	74.8139	72.8579	63.7874	59.5811
PF3D7_1248000	36.7146	42.8769	43.2924	38.4109	20.4431	18.314	31.8851	48.0526
PF3D7_1247900	79.1241	91.0507	90.7564	90.1333	87.5195	84.1613	70.9538	45.2657
PF3D7_1247800	73.8619	52.2936	41.4575	42.2191	23.4118	16.9465	12.3594	23.2993
PF3D7_1247700	81.2706	51.7916	39.4322	24.3206	9.61572	14.6097	10.6976	35.4336
PF3D7_1247600	46.7717	18.9891	10.5764	13.649	7.56448	12.2728	13.1383	17.8466
PF3D7_1247500	48.243	34.17	22.3992	14.6443	21.6895	22.7281	22.7107	32.4563
PF3D7_1247400	79.176	66.2801	77.8259	90.7218	95.1532	95.9148	94.7897	87.8137
PF3D7_1247300	66.2108	72.0962	73.3079	70.3133	63.7874	54.0073	51.4108	46.1485
PF3D7_1247200	42.9289	59.0791	63.9865	63.8567	59.9273	49.472	48.745	42.9462
PF3D7_1247100	41.0767	67.5437	70.0017	72.7021	65.8127	65.7262	63.9259	56.171
PF3D7_1246900	35.7279	23.2474	22.2434	24.7533	27.5576	39.7438	38.8264	39.0687
PF3D7_1246800	68.4958	49.6105	61.1563	78.726	88.6273	88.4369	88.333	88.835
PF3D7_1246700	24.8399	22.7107	24.8399	25.3419	56.2056	71.2307	71.8539	52.709
PF3D7_1246600	40.7911	75.3851	82.6727	81.9283	75.9044	75.4371	74.7966	57.6597
PF3D7_1246500	14.4019	43.0154	55.9114	55.2017	51.2204	44.9887	34.0142	27.1594
PF3D7_1246400	99.1518	96.0706	84.646	65.9685	55.8075	64.4106	62.6104	82.5861
PF3D7_1246300	83.0535	81.0975	84.7326	80.6993	53.9034	25.5323	31.2619	58.9406
PF3D7_1246200	99.8615	99.0653	95.084	89.2332	94.8935	97.3689	98.7883	99.8442
PF3D7_1246100	24.5629	26.8825	18.0717	24.3552	27.4364	32.1447	29.8079	22.2953
PF3D7_1246000	14.9559	39.2245	40.9555	39.7957	29.929	17.9505	14.073	11.0092
PF3D7_1245900	34.5681	62.5411	67.587	67.1283	68.8939	60.0831	55.2017	42.8942
PF3D7_1245800	90.8603	84.421	77.2373	79.3665	73.8792	73.3945	64.2202	56.4134
PF3D7_1245700	76.3545	64.7049	65.83	57.8847	55.3748	42.548	39.0514	31.7466
PF3D7_1245600	15.631	17.6216	20.3047	21.6375	14.9039	12.7402	10.2648	7.81548
PF3D7_1245500	50.2337	33.2006	25.74	18.6948	9.07045	22.053	47.0486	72.252
PF3D7_1245400	36.4895	24.0523	17.2927	32.2486	52.709	57.677	52.7263	43.1885
PF3D7_1245300	31.6254	16.8686	28.8385	30.431	51.1338	53.8861	50.7876	40.6786
PF3D7_1245200	13.5018	12.3247	8.60308	11.4246	37.5801	42.4961	42.0807	28.5442
PF3D7_1245100	21.8539	29.5482	32.0149	26.744	23.4551	31.937	39.3111	39.1726
PF3D7_1245000	27.9384	29.8944	45.6985	38.134	37.407	29.6001	33.3737	33.8065
PF3D7_1244900	28.2153	41.1373	46.9967	39.9515	43.5347	43.7424	40.6093	33.6507
PF3D7_1244800	70.521	91.8297	93.6472	94.4954	94.4781	93.8723	92.6432	85.4423
PF3D7_1244700	85.8923	86.8098	86.2732	88.4023	85.9443	85.9962	81.963	84.144
PF3D7_1244600	72.8406	65.103	67.0936	70.7461	69.8286	61.8833	69.7075	85.6846
PF3D7_1244500	13.3287	17.0504	11.6237	13.3114	7.40869	10.5764	10.5072	9.48589
PF3D7_1244400	53.6957	68.3746	63.1643	57.5039	66.0724	71.3173	75.9218	72.1136
PF3D7_1244300	34.7585	33.2872	24.234	16.5484	25.7573	21.3779	18.8939	19.8719
PF3D7_1244200	36.2991	63.874	66.0724	71.6289	68.0803	63.0604	53.6784	40.7305
PF3D7_1244100	86.2732	64.7741	63.6663	72.4944	78.9683	77.2546	66.7994	45.3003
PF3D7_1244000	64.099	43.0673	24.5802	36.1953	44.7118	59.5811	60.5851	56.1191
PF3D7_1243900	73.6195	47.793	37.4762	28.1461	20.0883	20.2527	18.7468	50.7011
PF3D7_1243800	25.1688	65.83	72.5982	76.3285	75.2467	72.7886	65.5704	45.6638
PF3D7_1243700	97.0746	89.3543	68.063	53.1071	38.6706	48.4854	56.3614	51.2896
PF3D7_1243600	97.2996	94.8935	94.807	94.0454	93.6472	92.9721	93.0241	95.4821
PF3D7_1243500	79.453	56.171	44.8849	48.0872	45.4907	53.8515	64.9299	81.5821
PF3D7_1243400	80.3358	56.3614	41.3363	19.8546	28.5962	32.439	30.5522	22.6934
PF3D7_1243300	29.1934	29.8684	3.32352	16.6955	15.7262	17.1629	18.9545	15.3886
PF3D7_1243200	10.8967	24.4071	37.9955	42.098	32.915	31.3917	33.166	33.2699
PF3D7_1243100	38.6533	71.1269	74.6235	80.7686	74.7101	75.3332	69.6728	62.7488
PF3D7_1243000	46.5986	22.8838	17.059	12.896	29.2366	33.6161	39.2764	55.9979
PF3D7_1242900	59.7542	33.6074	42.1586	61.2775	82.4996	84.0575	81.0455	69.292
PF3D7_1242800	81.7033	84.7845	89.9083	90.1679	83.7286	81.7725	87.883	92.4009
PF3D7_1242700	95.4994	97.1092	97.5074	97.767	98.0786	98.1998	97.9401	97.5939
PF3D7_1242600	22.8319	54.1284	62.1603	62.7661	59.6157	44.4175	37.9089	32.664
PF3D7_1242500	36.2818	21.3952	17.5177	12.5671	34.5854	46.6159	62.9392	61.0351
PF3D7_1242400	26.8305	21.8885	30.6907	20.3306	25.9477	33.3737	34.7931	33.5295
PF3D7_1242300	46.8409	41.0767	38.7918	36.7319	59.3041	80.0415	83.5555	78.4836
PF3D7_1242200	33.443	53.8515	62.6104	66.7648	67.3014	66.0724	59.5811	57.4347
PF3D7_1242100	28.6827	35.5721	52.709	53.436	52.2763	53.7303	39.9342	47.4641
PF3D7_1242000	33.7805	28.2932	34.7585	35.148	29.0981	23.0569	31.7985	61.0524
PF3D7_1241900	78.2759	81.8418	81.3052	79.2453	73.983	70.0017	70.4345	74.3639
PF3D7_1241800	83.5382	90.1852	90.7911	90.9642	90.7564	89.5101	81.1321	64.4452
PF3D7_1241700	46.7371	43.9675	30.3964	37.4416	62.4546	84.0402	89.6486	86.2385
PF3D7_1241600	36.5761	24.9957	14.7654	41.9595	53.5053	63.8047	70.296	70.1056
PF3D7_1241500	20.2181	13.3633	16.6696	52.4147	61.5891	62.8354	52.8648	44.9368
PF3D7_1241400	28.1634	20.8759	22.6761	20.7461	11.7881	11.5112	14.0211	17.8986
PF3D7_1241300	12.6709	11.6323	8.96659	9.83209	20.27	25.6015	27.696	25.1168
PF3D7_1241200	47.3429	65.0338	68.8766	66.4705	65.8646	57.8501	58.0059	60.5851
PF3D7_1241100	68.8593	81.8764	84.144	79.0029	71.2307	59.4599	56.4826	50.8395
PF3D7_1240100	96.9707	92.9202	85.0268	70.7807	55.9114	40.9036	27.3152	24.9784
PF3D7_1240000	55.3748	72.7713	72.6329	64.2548	55.5306	43.0846	33.0102	33.893
PF3D7_1239900	49.6625	69.5344	68.6862	65.8646	61.8141	55.8594	50.5453	48.7277
PF3D7_1239800	47.3602	28.6308	24.2167	36.5934	47.7584	47.5679	49.0739	60.8793
PF3D7_1239700	62.9219	51.0126	49.7836	72.0616	84.8884	86.9136	90.116	91.847
PF3D7_1239600	24.4764	22.001	23.8272	53.7476	68.9977	72.9617	76.2853	64.9299
PF3D7_1239500	32.3871	24.5629	14.5145	18.1063	34.4816	35.9356	37.8051	52.5013
PF3D7_1239400	17.4831	22.1395	33.6334	26.0862	18.037	17.8899	14.4192	12.1689
PF3D7_1239300	63.1123	84.6114	88.1426	83.5209	78.6221	67.336	55.8941	48.0353
PF3D7_1239200	57.2096	40.592	34.4816	27.999	53.436	69.3093	80.3704	82.915
PF3D7_1239100	46.7198	35.0874	30.1973	34.1786	35.174	51.7916	55.6517	37.4762
PF3D7_1239000	76.9084	60.8274	62.1257	65.2069	64.7049	58.1271	49.8182	44.5733
PF3D7_1238900	93.1972	82.3438	64.2721	59.7715	64.0817	47.793	44.8676	35.3471
PF3D7_1238800	95.7071	94.2531	93.5434	90.4968	90.9815	91.3623	90.4102	89.5967
PF3D7_1238700	61.2602	43.1366	36.2645	39.588	68.5131	72.7021	67.1456	64.6356
PF3D7_1238600	80.4224	49.6971	38.7398	26.6747	19.4997	24.0782	36.1953	81.2186
PF3D7_1238500	53.99	49.3336	52.1897	63.0431	70.9365	70.3306	66.8513	62.3507
PF3D7_1238400	26.8478	21.4471	24.8572	22.7886	24.7014	21.0663	20.7201	24.736
PF3D7_1238300	73.8099	89.337	90.6353	90.1506	87.606	84.3517	79.4876	63.0777
PF3D7_1238200	12.2728	16.808	26.4411	20.7461	15.9079	13.4932	9.34741	7.52986
PF3D7_1238100	51.757	79.678	83.8497	90.9988	94.1838	94.4262	93.5087	85.5634
PF3D7_1238000	80.1454	59.0618	50.3549	44.3483	31.712	16.8253	17.085	76.8738
PF3D7_1237900	95.4821	92.8163	90.0814	89.0947	87.4502	86.4463	78.0855	52.8994
PF3D7_1237800	40.1593	61.5371	65.2588	61.7795	55.8594	49.022	51.5492	48.4161
PF3D7_1237700	93.353	89.3024	91.345	91.3104	95.534	95.6206	97.1092	98.1651
PF3D7_1237600	67.6649	77.6874	78.4144	77.5316	78.8125	72.5463	60.8101	51.6012
PF3D7_1237500	60.4466	68.0976	69.2401	68.6515	66.5917	58.5598	53.9034	61.2602
PF3D7_1237400	61.2775	47.7757	54.6997	55.219	47.2217	51.982	55.1844	55.9806
PF3D7_1237300	15.579	7.82413	13.1902	2.89077	7.05383	8.36074	15.1982	13.4845
PF3D7_1237200	69.2228	82.1707	81.8418	82.7246	81.1321	77.7739	60.3427	33.2179
PF3D7_1237100	63.3374	58.3694	61.2255	64.2721	70.2614	69.8113	55.7902	34.7758
PF3D7_1237000	27.6787	34.672	51.3242	58.2482	62.5757	58.6983	59.9965	58.9233
PF3D7_1236900	88.7831	63.7874	48.3988	41.6133	31.3138	32.6121	36.3337	65.3973
PF3D7_1236800	37.2771	18.1496	21.7414	12.5498	20.8672	24.1475	45.3696	60.4466
PF3D7_1236700	59.9273	37.5281	38.082	57.7982	69.9671	67.6995	63.8394	58.3002
PF3D7_1236600	10.0744	2.71767	9.65899	2.89077	9.08776	10.4379	14.9732	17.1196
PF3D7_1236500	28.6308	16.0464	8.09244	12.1776	11.4419	10.0658	8.23957	9.64168
PF3D7_1236400	55.0459	64.5318	65.8127	59.4945	48.1738	37.8051	42.1326	57.954
PF3D7_1236300	44.3483	34.6374	34.897	42.2538	42.0287	43.552	59.4253	62.2642
PF3D7_1236200	56.6211	51.4454	51.2204	49.2297	38.082	45.8369	58.629	51.3935
PF3D7_1236100	72.4078	87.2079	94.0107	94.53	93.7165	92.2797	93.0933	91.8643
PF3D7_1236000	41.4575	50.5799	54.9247	58.5079	60.3254	60.4293	66.4705	70.9884
PF3D7_1235900	67.1629	84.871	86.2212	84.0921	82.413	80.8897	80.4916	74.6754
PF3D7_1235800	8.89735	10.3514	15.1636	13.7268	16.3407	22.278	20.3739	12.6363
PF3D7_1235700	58.0665	53.0466	46.01	45.6811	57.0711	85.2865	90.1852	84.9922
PF3D7_1235600	77.7566	60.6716	48.3815	45.3349	51.3761	87.3118	94.8762	95.6033
PF3D7_1235500	39.3803	63.7009	65.9512	66.6263	63.3893	59.91	54.8901	52.7783
PF3D7_1235400	18.4871	37.3377	52.8821	51.1857	47.6891	40.7997	38.6014	31.5562
PF3D7_1235300	92.0201	94.4435	95.1532	94.08	91.8643	90.7564	91.0507	89.3024
PF3D7_1235200	78.3625	48.9527	29.3924	23.2474	11.0265	11.2861	19.9065	74.9005
PF3D7_1235100	69.6469	56.2403	44.7897	44.4521	28.0942	26.8825	41.7345	68.0803
PF3D7_1235000	45.3176	19.543	14.7308	11.3121	29.2886	27.5576	20.0969	21.3259
PF3D7_1234900	96.3476	85.5288	69.2055	71.1269	85.2172	94.3396	96.7457	97.49
PF3D7_1234800	49.1778	73.6022	75.5063	80.3531	79.9204	78.3798	75.1082	61.3294
PF3D7_1234700	17.0331	27.3325	33.9103	32.0149	25.6015	18.6256	14.852	13.1556
PF3D7_1234600	33.945	16.9292	11.0092	9.78016	15.8387	31.5908	54.3015	63.2335
PF3D7_1234500	43.3962	67.4225	69.0843	66.8859	63.5278	56.2922	48.3642	42.9462
PF3D7_1234400	6.2143	19.9844	15.3886	21.5683	11.892	10.6284	8.42998	2.38878
PF3D7_1234300	18.0544	14.8174	12.2642	14.0557	33.5814	40.9728	45.7158	41.6133
PF3D7_1234200	47.066	30.5349	28.3711	34.3604	49.2297	51.6012	55.167	58.906
PF3D7_1234100	65.0511	75.8179	79.9896	80.5262	77.8951	69.5863	67.561	67.1456
PF3D7_1234000	44.4521	48.1738	60.412	65.83	68.4958	70.3479	65.9339	61.5371
PF3D7_1233900	50.0606	64.7395	67.5091	68.9285	67.8899	68.0284	63.9086	64.1336
PF3D7_1233800	72.0962	61.9526	55.1844	56.7076	58.8541	78.449	86.8444	91.0334
PF3D7_1233700	53.8688	35.2432	28.5529	27.8518	34.9143	30.1714	30.1887	40.5228
PF3D7_1233600	57.1231	74.1215	76.4237	73.8272	69.794	77.6701	80.5955	69.8113
PF3D7_1233400	64.7222	79.2972	84.3344	81.8245	79.4876	71.75	66.4532	55.1844
PF3D7_1233300	18.816	18.8852	17.6389	22.8925	50.1125	60.6543	57.5904	39.2072
PF3D7_1233100	75.7487	86.7578	91.068	92.2451	92.3144	90.341	91.7777	93.076
PF3D7_1233000	30.8638	48.1392	56.0499	48.3815	44.0713	47.9834	53.2283	49.524
PF3D7_1232900	20.1489	25.3073	16.6263	48.8143	53.6091	47.6891	33.6853	19.9238
PF3D7_1232800	40.7651	29.3059	42.2884	50.528	59.5292	71.9751	52.8994	32.214
PF3D7_1232700	72.7713	48.4334	36.5934	18.5217	25.3419	24.234	25.8612	51.9474
PF3D7_1232600	84.8191	64.4971	48.2603	37.5974	46.4082	51.757	58.0578	61.1909
PF3D7_1232500	92.799	78.1548	58.9839	42.1499	19.041	20.045	31.9889	75.6794
PF3D7_1232400	83.5209	79.5222	79.3665	73.8792	72.4251	65.2069	59.7196	71.1096
PF3D7_1232300	36.351	22.2953	16.6263	26.3805	30.8292	46.9448	70.6422	66.5917
PF3D7_1232200	43.7338	25.8525	23.1781	29.6174	33.0448	43.9501	56.7076	56.6211
PF3D7_1232100	72.3559	52.8994	44.08	66.9379	87.0521	91.0161	91.1026	86.654
PF3D7_1232000	30.3618	20.4085	19.3266	46.8929	50.3375	46.1312	43.7597	50.4414
PF3D7_1231900	23.9744	40.7305	51.3069	52.7263	52.5186	44.2444	42.4788	36.5934
PF3D7_1231800	39.363	73.2387	79.3838	81.0628	57.0365	53.6264	59.2695	54.4746
PF3D7_1231700	30.6041	20.5383	26.8132	39.9169	45.5946	52.6398	69.0151	54.1284
PF3D7_1231600	50.0087	63.7355	74.9005	76.9604	69.0843	65.4665	70.0883	66.0377
PF3D7_1231500	84.369	82.1014	83.3218	77.8605	79.2972	78.224	79.7819	64.6183
PF3D7_1231400	85.1653	63.7528	47.6026	36.6799	30.1194	25.965	25.3938	20.2354
PF3D7_1231300	55.3921	30.7772	25.5842	14.7135	9.43396	7.85875	7.0798	10.7149
PF3D7_1231200	91.7604	76.493	60.8274	44.1925	25.0649	22.3992	25.8958	19.6642
PF3D7_1231100	89.0947	87.8311	89.337	90.9815	90.1679	90.5141	90.4968	93.1279
PF3D7_1231000	54.44	53.211	55.0632	50.5972	41.4921	41.6479	50.8395	50.753
PF3D7_1230900	85.0268	90.7218	90.3583	84.5595	79.2626	74.3292	65.0164	40.592
PF3D7_1230800	79.955	90.5833	92.2451	92.9202	91.1719	89.8736	86.9136	79.73
PF3D7_1230700	90.9988	93.8203	93.3703	92.8856	91.7431	90.7911	92.3317	94.0107
PF3D7_1230600	38.8437	46.4428	46.8582	59.1657	65.0511	77.2893	72.1136	46.7371
PF3D7_1230500	37.4416	61.4852	67.3533	65.0338	61.5198	52.3801	36.5761	25.0822
PF3D7_1230400	62.2988	49.4547	38.636	44.8503	71.802	87.7964	89.9602	88.1253
PF3D7_1230300	61.0438	38.6533	33.1487	18.8506	26.2766	28.977	22.4165	25.515
PF3D7_1230200	20.3566	18.3659	19.7854	24.6754	52.0512	60.4466	56.3268	36.5241
PF3D7_1230100	32.7333	28.198	25.9997	18.7121	20.6335	13.2941	13.0258	14.0038
PF3D7_1230000	41.7518	52.6225	59.7888	62.5411	67.838	66.6436	66.0031	60.8447
PF3D7_1229800	87.1906	62.8008	46.1139	29.5828	13.7788	17.4658	13.4672	27.3498
PF3D7_1229700	50.5106	39.7265	44.054	29.704	49.5153	76.2333	87.6753	86.0654
PF3D7_1229600	61.3467	44.1579	41.0074	34.8364	46.1139	66.7994	78.0163	79.1068
PF3D7_1229500	71.6116	90.4968	92.1066	93.6992	95.1878	95.2917	94.4089	87.7618
PF3D7_1229400	84.2479	95.811	97.1265	96.1399	96.6245	97.265	97.8362	96.2957
PF3D7_1229300	80.3704	51.0819	44.1925	47.6372	33.7372	28.7519	43.4482	80.457
PF3D7_1229200	18.2275	22.5203	34.1527	40.7305	23.4897	14.5923	11.4765	10.888
PF3D7_1229100	82.5861	91.8643	93.4049	92.9721	88.2984	79.176	70.0537	62.1084
PF3D7_1229000	42.7731	67.1283	69.7594	67.6303	61.3813	56.8634	52.0859	43.6039
PF3D7_1228900	39.7957	68.7554	67.786	74.9524	78.951	81.4956	73.8792	48.8489
PF3D7_1228800	77.6528	65.2934	68.8246	77.2546	81.5129	83.4862	87.3118	89.4928
PF3D7_1228700	50.6318	37.2512	32.0928	22.8925	22.7281	37.9436	49.9221	70.071
PF3D7_1228600	99.273	94.3569	82.5688	69.4997	50.3722	47.6458	81.0801	99.6192
PF3D7_1228500	60.7236	32.7592	29.6434	36.3684	49.9394	63.1643	59.685	45.8889
PF3D7_1228400	48.9181	69.4478	71.6808	71.8885	70.5383	63.1297	49.0047	36.853
PF3D7_1228300	68.4092	47.5333	38.8783	31.2792	41.7691	67.5783	78.0336	83.5035
PF3D7_1228200	12.117	11.5631	8.04916	8.51653	30.2406	32.7679	28.6308	18.4352
PF3D7_1228100	13.5884	10.6284	3.32352	7.65103	2.92539	22.4338	25.7054	20.1921
PF3D7_1228000	18.4179	21.4817	17.2408	25.7746	25.1255	30.4051	33.4949	33.5814
PF3D7_1227900	47.4122	69.6728	76.1987	76.5276	75.1601	67.3879	56.8115	36.9569
PF3D7_1227800	77.0123	85.6327	85.5981	85.1134	83.7459	77.8951	63.147	35.4163
PF3D7_1227700	86.4116	82.6207	77.6701	71.3865	69.8633	63.5451	43.6732	52.9167
PF3D7_1227600	71.5769	48.771	34.17	37.4762	45.3696	61.8487	78.3279	83.7459
PF3D7_1227500	63.2508	42.4442	35.676	25.3938	22.9012	38.359	70.1921	85.7539
PF3D7_1227400	62.4026	62.3853	64.2202	63.1123	60.6543	50.1471	50.9607	64.4625
PF3D7_1227300	41.1979	21.1355	14.7135	10.2822	11.7708	9.39069	18.089	35.0701
PF3D7_1227200	45.8889	62.0391	69.3786	76.216	74.762	70.3652	68.2188	68.4784
PF3D7_1227100	29.3924	50.8915	58.8714	61.7275	69.0497	71.4731	65.9512	46.4428
PF3D7_1227000	59.1137	36.2645	21.3086	28.7606	32.3005	25.8439	30.2925	67.3706
PF3D7_1226900	23.7147	17.8466	18.0544	44.5906	45.6638	41.1113	38.8437	44.2444
PF3D7_1226800	50.5453	38.1167	44.9022	51.2204	54.3189	50.1818	52.5013	74.0003
PF3D7_1226700	58.681	74.6408	76.1295	77.2719	76.6661	67.9418	51.5146	35.2605
PF3D7_1226600	60.3254	32.4909	39.4149	36.853	56.6557	73.1868	82.1707	79.2626
PF3D7_1226500	17.7774	17.8986	27.9903	38.9649	42.7558	41.0074	33.7545	25.8958
PF3D7_1226400	52.5186	52.3282	60.8101	63.5797	68.6862	64.7914	68.6862	70.6249
PF3D7_1226300	98.0959	96.8323	96.4688	95.4128	95.9668	96.1052	96.6072	96.3649
PF3D7_1226200	22.555	33.7892	30.431	30.8292	18.2101	17.7601	16.2887	12.0651
PF3D7_1226100	43.0846	44.2617	45.3176	42.9981	40.2458	40.6786	36.2472	40.8343
PF3D7_1226000	12.8094	13.9346	12.7056	15.3194	35.1567	36.8184	30.0329	19.6815
PF3D7_1225900	21.6375	16.1416	15.5098	30.9676	40.4708	35.7279	43.4308	51.5839
PF3D7_1225800	70.1575	81.5994	84.1786	82.9842	84.369	84.3344	87.1733	88.4023
PF3D7_1225700	52.0339	74.6062	79.0549	77.0123	69.6902	68.6515	69.1189	55.7729
PF3D7_1225600	74.2427	85.9096	87.4329	86.2385	83.7113	79.8684	75.5582	65.1982
PF3D7_1225500	65.2415	74.3552	77.6874	74.0869	70.3999	62.7142	43.4135	31.3658
PF3D7_1225400	66.3147	77.3585	80.5435	78.224	77.5489	66.557	47.3429	30.1541
PF3D7_1225300	66.3666	74.26	75.9218	72.9617	71.7847	61.3986	55.4786	50.251
PF3D7_1225200	62.8354	71.5943	72.4078	69.1276	69.4305	65.0684	62.7661	64.5318
PF3D7_1225100	12.1516	10.386	14.4712	45.508	51.1684	45.0407	40.5747	33.391
PF3D7_1225000	9.6763	8.23092	8.84542	34.2565	41.8037	35.624	28.0076	17.9678
PF3D7_1224900	75.4717	78.4663	72.3213	70.5383	67.4052	65.9512	56.3441	66.557
PF3D7_1224800	63.5797	57.3135	53.3322	42.8942	39.0168	36.9396	46.4255	56.5172
PF3D7_1224700	76.1468	72.0789	62.593	47.291	43.327	40.6959	36.5068	43.3962
PF3D7_1224600	44.6252	57.677	68.5131	82.188	80.8984	78.8991	58.1963	33.9276
PF3D7_1224500	77.3239	51.6531	44.2271	45.3869	72.3386	80.9936	90.6007	94.9801
PF3D7_1224400	74.485	83.5209	86.8444	82.0668	83.5901	76.3026	62.9739	41.9422
PF3D7_1224300	99.1172	99.6365	99.5846	99.4807	99.0826	98.5633	98.6152	98.6152
PF3D7_1224200	73.5676	46.9275	30.3272	12.0651	21.3952	21.9664	24.3379	24.3206
PF3D7_1224100	81.2013	53.0898	39.839	34.7066	42.4788	49.247	60.0312	90.5141
PF3D7_1224000	67.8553	66.7474	75.2986	78.2932	89.5621	90.5487	92.0893	89.4409
PF3D7_1223900	25.3073	28.2932	15.8906	28.3884	54.4054	64.878	59.0358	50.4241
PF3D7_1223800	47.1698	72.027	75.4544	77.0815	71.8193	65.83	61.7449	57.6251
PF3D7_1223700	44.0713	43.1712	52.2936	62.1949	80.4397	82.7419	86.3424	84.3864
PF3D7_1223600	19.8546	37.2165	51.6877	50.2856	47.1525	35.9529	35.6413	43.1539
PF3D7_1223500	40.869	61.918	65.5011	64.7049	61.9526	54.3362	50.3029	47.5679
PF3D7_1223400	95.6033	95.0666	95.5686	94.8243	93.4741	91.5181	90.4795	90.566
PF3D7_1223300	50.0779	44.2963	49.9913	53.8861	55.7383	54.5958	55.5825	59.8407
PF3D7_1223200	53.1245	62.5065	66.7301	64.8087	61.5371	56.0499	60.6024	75.4198
PF3D7_1223100	98.1305	90.1333	68.9285	54.3015	38.1513	54.0592	82.5169	95.6898
PF3D7_1223000	81.0455	50.978	46.4428	25.2207	12.7229	18.4179	30.5349	60.4293
PF3D7_1222900	21.6029	18.7641	25.9823	25.1688	47.3429	54.0938	52.1205	37.3204
PF3D7_1222800	14.9559	16.4186	29.5136	27.999	24.1302	27.1335	26.017	20.3739
PF3D7_1222700	99.4115	95.7071	85.7192	68.4092	46.564	63.9432	74.6408	92.5221
PF3D7_1222600	75.3332	74.5716	67.1629	63.7355	50.7876	31.0542	22.278	24.9091
PF3D7_1222500	82.7073	75.1255	74.4158	71.4731	64.5318	55.6171	54.1631	65.7608
PF3D7_1222400	50.1298	32.2313	32.3697	41.5441	56.0672	66.0897	67.1283	56.2576
PF3D7_1222300	76.6315	73.5157	84.2652	91.8643	94.0454	94.7378	96.0706	96.7976
PF3D7_1222200	23.8013	54.5958	56.4307	56.4653	56.1191	44.3137	30.2406	24.9437
PF3D7_1222100	28.5269	34.9836	41.3536	44.3656	38.61	50.6837	62.143	57.5731
PF3D7_1222000	10.6284	6.71629	8.89735	23.0916	34.6547	32.5602	29.2886	25.6188
PF3D7_1221900	89.1639	93.1279	93.7857	92.7817	84.8191	68.063	43.1366	37.2512
PF3D7_1221800	50.6837	39.2418	41.7345	43.1539	41.319	50.8222	53.4187	67.1283
PF3D7_1221700	21.8279	23.7147	43.0327	53.7995	54.492	48.5546	42.1845	41.6306
PF3D7_1221600	22.1914	15.6656	10.888	14.1942	40.9036	48.6065	45.9581	38.359
PF3D7_1221500	9.07045	10.0744	8.62039	7.74624	32.5428	43.1366	35.0701	21.9318
PF3D7_1221400	30.6474	39.2591	41.9855	36.8011	21.0144	20.547	19.9238	15.0943
PF3D7_1221300	72.6329	47.6026	41.094	31.1148	34.4123	49.2816	60.2735	70.1402
PF3D7_1221200	44.9022	67.4398	79.8165	82.7765	87.4675	84.8537	85.1653	84.7153
PF3D7_1221100	27.7307	22.0703	29.6001	40.1419	35.7106	31.2446	27.2806	26.8825
PF3D7_1220700	8.55115	2.71767	3.32352	17.5351	8.45595	7.99723	17.8986	16.8946
PF3D7_1220600	25.3765	44.7724	51.757	48.745	43.6559	36.1087	43.8463	46.1139
PF3D7_1220500	25.5496	56.1537	61.9526	55.0286	55.0632	45.3003	38.2032	30.8638
PF3D7_1220400	69.4997	69.9325	74.8139	72.4251	68.4438	56.7249	43.8636	42.3922
PF3D7_1220300	41.6479	19.6988	15.2847	14.073	22.7454	29.2539	38.7398	62.4546
PF3D7_1220200	27.1248	8.70694	10.862	7.20962	28.9077	36.2818	50.0952	49.4374
PF3D7_1220100	45.5773	66.2108	69.8459	69.1882	65.3107	56.3614	54.5612	56.6384
PF3D7_1220000	5.64307	9.07045	11.2169	9.90133	2.92539	11.2688	8.27419	8.17033
PF3D7_1219900	41.9249	34.7412	44.6252	56.4826	60.6716	67.5437	64.7395	60.9486
PF3D7_1219800	16.6176	12.2209	3.32352	2.89077	2.92539	2.93405	9.52051	2.38878
PF3D7_1219700	19.4218	27.4018	8.86273	20.6335	8.23957	13.623	14.5577	8.74156
PF3D7_1219600	70.1056	73.2906	75.3678	78.1028	79.6088	76.8911	72.9444	75.4544
PF3D7_1219100	52.934	66.6955	71.3	70.9019	69.4132	64.7049	69.2574	75.3332
PF3D7_1219000	75.8525	59.7023	69.1535	77.4624	81.7725	75.9564	67.1629	58.4213
PF3D7_1218900	35.5721	41.4921	55.8421	58.6637	61.5718	55.669	49.4201	34.4469
PF3D7_1218800	26.8046	30.8465	43.7684	43.4655	32.6121	24.8572	20.7028	16.8427
PF3D7_1218700	12.0132	16.358	18.8333	22.5809	9.8494	11.8401	15.5617	17.4485
PF3D7_1218600	66.7301	83.3478	86.9656	86.7925	84.3864	81.3225	75.4025	60.6716
PF3D7_1218500	88.0215	89.2332	81.6168	73.4984	60.0658	53.2802	43.1539	38.3936
PF3D7_1218400	82.8111	83.5728	84.9576	84.144	82.1187	75.9391	78.8818	89.9083
PF3D7_1218300	78.1721	70.071	68.0111	62.0911	55.2536	42.8769	39.7092	47.9834
PF3D7_1218200	67.0763	68.4958	68.8939	66.8167	65.0164	56.1018	51.0646	45.058
PF3D7_1218100	66.1935	47.3602	24.0003	13.2854	11.2688	13.0864	15.0943	19.9758
PF3D7_1218000	92.4355	81.7033	61.364	47.066	34.672	24.1648	26.744	32.5948
PF3D7_1217900	75.6102	56.4307	55.6171	63.8394	64.8953	64.0471	70.6076	81.409
PF3D7_1217800	73.7926	82.4303	87.8484	83.3131	83.9709	77.947	75.6794	65.8819
PF3D7_1217700	63.1643	73.1868	76.3891	73.6195	74.2427	67.3187	62.1776	54.9766
PF3D7_1217600	23.8186	42.9115	44.6599	23.8878	22.9877	13.0171	13.874	18.9372
PF3D7_1217500	93.5607	93.3876	93.9588	93.0587	93.1885	92.1932	91.6393	88.2984
PF3D7_1217400	83.8844	60.862	48.8835	53.4533	52.4494	38.5148	24.1302	37.6839
PF3D7_1217300	54.9247	59.7888	57.7116	55.9633	61.866	63.8394	64.4625	57.7116
PF3D7_1217200	83.0881	88.0907	87.9349	87.0348	85.5634	80.457	74.2773	53.9034
PF3D7_1217000	23.1435	26.6315	34.7066	35.676	30.9244	39.9688	37.6666	31.7033
PF3D7_1216900	88.3504	93.6992	94.7897	94.5647	95.084	93.6992	92.4009	89.4063
PF3D7_1216800	2.6744	2.71767	3.32352	2.89077	19.7507	2.93405	15.6829	28.5269
PF3D7_1216700	13.3633	20.4778	25.0303	21.7414	16.6263	16.7907	16.6003	12.3247
PF3D7_1216600	47.5853	43.1539	29.8425	15.2415	11.4073	2.93405	2.80422	7.46062
PF3D7_1216500	83.8324	84.0055	83.2785	80.3358	72.806	50.3202	39.8823	53.2802
PF3D7_1216400	77.0296	85.5115	86.8098	85.0615	74.0696	72.5636	77.1854	82.6727
PF3D7_1216300	83.0362	90.3237	92.1239	89.2678	83.642	80.0069	81.911	84.1613
PF3D7_1216200	86.5674	82.2918	85.0095	93.6126	95.1013	94.5647	91.4662	77.6874
PF3D7_1216100	23.3166	18.6083	21.3433	23.1954	29.0203	35.6413	49.6105	48.6758
PF3D7_1216000	39.2072	47.2217	61.7795	65.6396	68.0457	66.8513	64.0298	62.6104
PF3D7_1215900	37.7012	57.3481	62.4026	64.099	58.5079	49.8875	60.1869	69.0497
PF3D7_1215800	8.49922	6.01523	13.7442	8.04916	9.93595	2.93405	6.9067	6.19699
PF3D7_1215700	6.80284	6.75091	3.32352	6.02389	6.50857	2.93405	6.88939	4.8295
PF3D7_1215600	65.4838	36.351	39.5447	37.8224	45.8889	65.5357	77.0123	78.7779
PF3D7_1215500	9.08776	2.71767	14.2721	2.89077	2.92539	2.93405	2.80422	11.9872
PF3D7_1215400	65.8993	43.2751	37.8224	34.9143	32.8371	43.9328	55.7383	77.5489
PF3D7_1215300	49.5932	52.484	60.36	90.0467	96.4861	97.2131	95.4821	83.3304
PF3D7_1215200	33.0621	28.25	23.4291	25.6275	18.539	24.5975	40.2977	51.1338
PF3D7_1215100	28.0595	50.4068	63.649	65.5184	69.1882	59.685	41.4748	27.9211
PF3D7_1215000	64.2721	37.2685	32.1274	26.0343	22.6242	38.0994	54.8035	66.9552
PF3D7_1214900	75.714	46.1658	46.1485	60.6716	78.0422	84.0748	87.5541	90.5833
PF3D7_1214800	14.9559	28.7866	42.4096	37.9609	31.8851	25.1342	22.5723	22.4165
PF3D7_1214700	19.9931	33.0795	54.717	48.8489	44.1406	40.4708	37.4589	36.5415
PF3D7_1214600	32.5255	64.376	64.826	68.7035	63.3374	66.8167	61.5371	49.1432
PF3D7_1214500	29.7732	49.6278	54.6824	58.6983	41.9249	29.5309	29.0289	22.0876
PF3D7_1214400	59.7715	77.7912	80.3531	83.4343	87.0348	86.2905	87.9522	87.5714
PF3D7_1214300	53.7476	76.4237	82.0495	83.2958	83.7805	83.4516	84.5941	80.5608
PF3D7_1214200	8.60308	23.5243	31.4696	31.5562	33.443	34.8278	25.7919	17.0331
PF3D7_1214100	49.2643	29.6867	26.1381	22.2607	20.2354	34.2392	71.6808	79.7473
PF3D7_1214000	32.1274	21.5769	25.5063	2.89077	16.306	34.6547	61.0438	61.4506
PF3D7_1213900	78.6567	86.2732	86.7751	84.9576	79.3318	67.9072	55.4959	49.1085
PF3D7_1213800	55.8248	74.1561	74.7101	81.3398	77.6874	76.6142	70.5903	58.5771
PF3D7_1213700	67.838	79.8858	83.5901	76.6661	77.6355	73.5503	69.3093	42.2711
PF3D7_1213600	60.412	50.2856	48.7104	45.3609	78.726	89.5794	92.1759	91.2065
PF3D7_1213500	9.10507	10.3168	16.4445	9.19162	8.60308	8.62039	6.54319	8.68963
PF3D7_1213400	14.5231	14.2288	11.8747	20.547	9.24355	7.16635	9.83209	10.8361
PF3D7_1213300	13.0777	25.0389	16.0724	23.3339	18.5737	9.27817	11.6496	11.4939
PF3D7_1213200	16.3234	21.2134	38.1426	51.3761	58.906	65.6915	68.9285	55.2536
PF3D7_1213100	24.6495	30.5522	3.32352	25.9477	24.286	2.93405	15.0597	22.2693
PF3D7_1213000	13.1383	19.5603	21.8972	20.4085	15.4405	11.1996	8.37805	5.85079
PF3D7_1212900	93.1625	93.4741	92.0547	89.1466	91.12	91.4488	89.7178	87.606
PF3D7_1212800	76.1814	52.7436	49.0393	43.327	40.9901	59.8927	68.0284	80.907
PF3D7_1212700	94.028	96.7976	97.5766	97.5074	97.1092	96.9534	96.3995	95.0666
PF3D7_1212500	61.1909	78.4317	83.192	81.4783	64.2721	65.1895	81.7033	87.156
PF3D7_1212400	30.5262	18.1063	17.31	31.21	46.3736	49.9308	48.9874	51.8089
PF3D7_1212300	20.0104	19.5949	21.551	18.6775	41.8903	47.0313	44.1059	30.708
PF3D7_1212200	14.0557	11.2515	16.6869	14.0298	43.9675	42.3057	33.3218	22.8838
PF3D7_1212100	45.7504	38.7398	52.3282	55.4267	61.0178	67.2408	71.8366	71.9231
PF3D7_1212000	44.1925	44.3829	53.938	58.6117	65.2242	74.4677	85.8404	87.9522
PF3D7_1211900	93.3876	91.2238	91.6912	93.7857	94.4435	92.9894	90.3756	82.7246
PF3D7_1211800	97.4727	92.851	90.8257	94.1319	94.3916	94.08	94.6339	97.1438
PF3D7_1211700	84.6806	62.7315	48.4161	40.1246	53.3149	86.3424	93.7165	96.0014
PF3D7_1211600	45.8369	61.7622	67.0763	69.3266	71.8366	68.3919	68.0457	62.0391
PF3D7_1211500	25.5323	49.4374	58.1097	55.9114	57.4	48.7796	40.315	38.5494
PF3D7_1211400	91.3796	96.2957	96.3822	96.5726	96.3649	96.7457	96.9188	95.9495
PF3D7_1211300	41.2152	27.8172	35.5461	32.6986	30.1367	35.2778	45.6292	56.4307
PF3D7_1211200	66.9032	75.3505	75.2813	72.1309	68.7208	63.649	56.7249	57.3135
PF3D7_1211100	39.0254	28.8039	21.2048	38.5667	41.0248	38.1859	27.4883	23.507
PF3D7_1211000	29.0289	28.0769	23.6022	24.8053	27.471	25.0822	23.3079	22.9358
PF3D7_1210900	39.6226	36.0914	42.6173	38.9995	38.9476	46.5293	59.9273	73.0656
PF3D7_1210800	11.9439	2.71767	3.32352	2.89077	17.2581	2.93405	11.1996	12.0824
PF3D7_1210700	27.4883	21.551	19.1276	19.9585	15.631	28.7	42.6	51.3069
PF3D7_1210600	79.9204	85.3384	82.2053	78.6394	76.7873	75.0736	68.9458	60.6543
PF3D7_1210500	25.2726	50.3375	52.5186	51.757	36.9223	28.925	25.5669	20.8066
PF3D7_1210400	58.7329	67.786	67.9072	62.7835	57.7635	45.6292	40.5401	42.2018
PF3D7_1210300	30.0156	59.183	67.1283	66.0377	72.2867	68.4784	58.0751	45.1618
PF3D7_1210200	12.7229	18.7987	28.5962	23.1089	17.2235	13.7268	11.0092	9.10507
PF3D7_1210100	74.0696	42.5134	36.0048	53.2629	64.7914	60.7062	61.2255	72.3905
PF3D7_1210000	51.6012	33.6334	36.8357	49.2643	59.4253	66.5224	68.5304	75.3851
PF3D7_1209900	36.0741	24.9437	20.071	33.5468	49.8182	52.259	56.2749	55.5998
PF3D7_1209800	28.4577	13.2422	17.5697	17.1369	44.4694	46.3909	48.5719	41.1286
PF3D7_1209700	49.0393	33.3218	36.0395	43.2751	53.1418	58.3694	47.6545	43.777
PF3D7_1209600	53.6264	30.6041	19.4305	19.2401	13.3287	15.1982	15.2847	16.5484
PF3D7_1209400	92.2278	75.264	52.8994	46.8236	59.2522	66.7474	56.5692	35.1047
PF3D7_1209200	83.7805	94.1319	93.7165	94.6512	93.8376	94.1838	93.8549	92.349
PF3D7_1209100	14.1942	30.0502	43.5174	41.4575	35.2951	30.7599	25.1861	20.0969
PF3D7_1209000	54.0246	79.9723	81.911	85.3038	84.3171	84.2392	82.7419	74.0523
PF3D7_1208900	71.8539	60.0312	62.8354	68.1149	77.7393	79.6953	81.7899	88.7485
PF3D7_1208800	70.1229	78.9856	77.8778	71.3	60.4639	51.6704	49.7663	59.9792
PF3D7_1208700	20.045	21.5769	27.9384	37.13	49.9048	61.5025	63.597	51.3588
PF3D7_1208600	33.7805	51.4627	69.292	82.3092	89.0428	86.377	80.1627	57.0885
PF3D7_1208500	11.3554	16.081	35.2086	41.1805	42.9462	34.672	25.7746	18.5563
PF3D7_1208400	35.0182	19.6815	21.1355	16.6522	14.4712	21.2394	32.6467	59.0272
PF3D7_1208300	45.1792	26.5709	36.8703	56.7423	85.8404	90.8084	89.5967	80.0069
PF3D7_1208200	9.63303	10.5764	12.1689	11.0438	11.9958	11.5804	11.3208	9.3301
PF3D7_1208100	55.2709	66.4186	67.6129	64.3067	61.3467	48.9527	33.6507	24.9611
PF3D7_1208000	20.1835	11.5112	21.6202	21.3433	34.0921	33.443	30.0502	36.6799
PF3D7_1207900	26.6488	38.1426	47.3602	41.2844	50.5972	58.1617	41.5441	33.3391
PF3D7_1207800	16.6522	37.5454	45.1099	42.548	39.2418	37.5627	26.5709	19.7334
PF3D7_1207700	45.5946	42.9808	38.6879	36.6626	30.1714	27.194	22.2434	15.6483
PF3D7_1207600	31.435	65.8993	70.9884	70.4518	73.8099	68.2188	57.2962	36.0395
PF3D7_1207500	47.8449	31.4004	22.3386	25.9044	42.1412	39.9515	50.8828	65.1376
PF3D7_1207400	26.8652	31.1407	32.2313	30.0156	15.1203	13.9346	14.575	9.35607
PF3D7_1207300	19.318	25.3592	23.8792	32.7419	30.7426	24.7533	22.3645	12.9652
PF3D7_1207200	13.1729	10.1091	10.161	10.1783	10.4466	17.6043	21.7068	20.4951
PF3D7_1207100	89.2678	91.1719	91.6739	90.4449	90.2718	88.835	86.8098	79.6607
PF3D7_1207000	70.4172	45.6985	39.138	31.8331	41.1113	56.9154	68.3746	79.6434
PF3D7_1206900	27.194	26.2939	32.9064	38.0128	30.0156	25.4457	21.776	21.7587
PF3D7_1206800	44.4694	44.833	54.0592	59.8407	65.6396	63.0258	58.7329	46.9448
PF3D7_1206700	90.6526	92.297	93.9761	94.028	95.1186	93.5953	92.4701	90.8603
PF3D7_1206600	68.1149	88.0388	89.7525	89.5274	87.3118	84.3171	74.0177	45.1099
PF3D7_1206500	61.1044	54.0765	53.0898	49.3682	33.5641	24.4244	22.4684	19.9931
PF3D7_1206400	56.5345	33.3564	9.20028	9.65899	10.2129	15.6483	16.1849	23.1262
PF3D7_1206300	87.4675	58.6464	45.1965	35.6933	30.5868	29.7213	25.9477	49.5932
PF3D7_1206200	85.6673	93.353	94.5993	95.2051	95.3782	94.807	93.301	89.5274
PF3D7_1206100	43.1366	35.9356	31.712	27.2633	16.2368	12.7748	14.7828	17.7082
PF3D7_1206000	90.5487	59.5638	44.4694	29.1328	15.9858	18.6775	21.499	69.8979
PF3D7_1205900	67.786	68.9804	73.4291	77.0642	72.2693	69.6209	64.5837	64.1509
PF3D7_1205800	88.7139	87.6926	86.5674	84.6114	84.6287	83.8324	85.1826	85.4077
PF3D7_1205700	44.1752	31.4696	37.6753	40.315	58.7329	68.565	60.9832	59.8754
PF3D7_1205600	71.4731	63.4066	56.3095	66.2974	92.799	96.1745	96.3303	93.8549
PF3D7_1205500	89.7178	88.2811	79.5569	77.0469	56.8461	48.2777	63.5451	79.4011
PF3D7_1205400	40.0208	39.2764	51.6704	52.4494	41.6825	30.8292	30.1714	39.0341
PF3D7_1205300	21.3086	13.6663	14.9472	6.8288	23.5243	29.8771	40.4881	51.5319
PF3D7_1205200	38.2725	14.0557	3.32352	8.39536	10.3341	6.75091	12.4632	26.7613
PF3D7_1205100	35.901	50.1471	58.1271	64.9818	73.3945	76.8738	67.6303	45.4907
PF3D7_1205000	75.9564	52.5532	47.2564	44.3829	33.391	33.1833	45.0926	66.4359
PF3D7_1204900	93.5087	75.5409	57.5904	45.2138	37.5281	25.2553	20.0796	27.0036
PF3D7_1204700	49.4894	47.9834	39.6226	40.1766	46.7803	71.1096	80.0762	79.9204
PF3D7_1204600	31.8851	65.328	70.9711	68.9112	64.2894	50.0779	37.1819	33.2006
PF3D7_1204500	24.3119	56.6211	61.641	59.6157	60.4812	61.4852	56.4999	48.5546
PF3D7_1204400	23.0396	33.8757	41.821	34.9836	21.0663	13.4932	10.2302	8.25688
PF3D7_1204300	96.9188	98.4767	98.9095	99.221	99.6192	99.7057	99.6538	99.5153
PF3D7_1204200	17.1369	16.8946	12.9566	6.8288	29.5828	32.0409	35.5721	30.7426
PF3D7_1204100	25.9477	30.0329	35.7971	28.7346	38.1167	42.1326	39.7611	32.9064
PF3D7_1204000	21.2654	29.4443	12.7402	28.7606	17.3793	13.2162	2.80422	10.1783
PF3D7_1203900	98.1651	96.6419	95.3782	96.036	96.5207	96.7976	96.2437	95.5686
PF3D7_1203800	58.4559	47.7064	47.5333	48.1911	39.5188	28.0769	21.8106	18.8506
PF3D7_1203700	98.1998	97.9228	97.4727	96.763	96.4168	96.8496	96.815	96.0533
PF3D7_1203600	26.5016	52.5013	53.2802	46.9621	41.4748	44.1232	41.0594	41.1805
PF3D7_1203500	77.0988	87.1906	87.658	82.3957	76.0429	76.3199	74.485	58.1963
PF3D7_1203400	68.5304	44.4694	38.2205	28.8385	51.9128	64.4625	72.2867	80.0589
PF3D7_1203300	38.0647	27.6268	27.471	14.35	26.8305	33.8584	39.3284	44.4868
PF3D7_1203200	71.8366	87.4502	88.9389	88.4369	87.0694	86.1001	84.8191	81.7033
PF3D7_1203100	75.1255	90.4102	92.7471	92.5913	89.3197	87.658	85.5634	81.1667
PF3D7_1202900	98.996	98.9095	98.3729	98.0786	97.5247	97.8016	98.8748	99.7403
PF3D7_1202800	54.1977	71.9058	76.3372	75.6102	69.9498	66.9725	68.2015	50.8049
PF3D7_1202700	75.5929	81.8072	82.0668	80.0242	79.4184	69.6555	51.6704	41.6998
PF3D7_1202600	92.2105	90.9815	89.8909	90.8603	89.1985	88.6619	89.614	92.5567
PF3D7_1202500	46.6505	58.8195	63.3028	57.5212	52.2416	43.5174	31.4869	24.4071
PF3D7_1202400	64.6183	55.0805	46.5813	39.0341	48.4681	67.059	79.5222	70.2614
PF3D7_1202300	15.0078	18.7814	25.3765	21.6548	13.3633	15.8733	17.2927	16.7042
PF3D7_1202200	69.6209	47.6891	36.5415	47.6199	43.6039	60.8793	83.417	90.9988
PF3D7_1202000	22.0703	34.9143	51.7916	54.7516	46.2178	41.8383	35.3817	31.1754
PF3D7_1201900	66.107	67.8207	69.3093	73.4291	71.9058	78.2067	75.3332	74.1908
PF3D7_1201800	36.2385	23.3858	20.3047	19.1622	25.1774	40.0727	53.2802	52.2936
PF3D7_1201700	37.1646	21.7847	29.3232	20.5297	27.5056	30.3272	40.0381	40.2285
PF3D7_1201600	29.427	25.2899	24.2687	32.889	12.5498	32.0755	36.9396	37.9263
PF3D7_1201500	65.1376	76.1987	77.999	73.6541	74.7793	69.9498	54.0592	34.2219
PF3D7_1201400	22.4511	41.4575	47.5679	48.9181	31.66	30.5695	27.194	15.7867
PF3D7_1201300	37.632	48.4508	49.0912	33.2179	20.824	11.9093	2.80422	16.2714
PF3D7_1201200	96.8669	95.7417	95.1013	89.337	76.8219	64.2375	42.098	34.7153
PF3D7_1201000	55.0978	60.1523	63.095	95.1186	99.1172	98.5806	96.4341	79.3838
PF3D7_1200800	79.3145	81.5648	79.6261	70.8326	63.7528	54.717	42.2191	29.2366
PF3D7_1200700	98.8402	99.221	98.1478	94.8416	76.5103	67.2667	50.6837	31.937
PF3D7_1149600	91.9162	91.2931	88.5061	84.9403	76.7007	60.5158	31.1754	19.1622
PF3D7_1149500	78.5183	83.6593	79.6607	68.7727	41.0594	24.9437	13.3114	10.2129
PF3D7_1149400	20.5989	10.9226	50.5799	79.5569	95.4648	93.3356	87.1387	49.6105
PF3D7_1149300	74.9697	63.9432	57.0365	45.0061	38.7398	35.5202	24.788	17.085
PF3D7_1149000	18.7641	16.3753	14.125	50.3202	82.9669	88.887	81.7552	42.548
PF3D7_1148900	94.1492	96.5207	96.7284	95.3436	83.2266	61.7102	34.2912	21.9837
PF3D7_1148800	80.2666	86.4636	81.2879	67.7514	40.9555	38.2465	36.2818	27.6614
PF3D7_1148700	76.0775	92.9375	95.6898	96.4168	89.4928	72.278	66.4878	46.0447
PF3D7_1148600	8.72425	7.70296	7.46927	7.05383	6.19699	7.39138	8.91466	9.38203
PF3D7_1148500	35.9616	34.4469	42.8942	35.4336	21.8626	12.6536	16.7648	16.4272
PF3D7_1148200	64.7914	51.8954	55.3748	50.8395	30.1541	36.1953	47.9834	42.1845
PF3D7_1148100	17.2235	13.4672	40.7305	44.9887	36.8877	40.0208	46.4601	38.3763
PF3D7_1148000	35.6586	31.5216	30.4656	28.9683	29.6348	46.6678	65.5011	61.5891
PF3D7_1147900	66.3839	65.2069	72.1828	70.6422	62.1776	52.484	54.7689	74.4158
PF3D7_1147700	55.2536	45.6465	41.0248	35.399	48.2171	66.0377	76.8392	81.7725
PF3D7_1147600	35.3124	27.7826	15.4059	18.6083	29.7559	35.6933	45.0061	56.2749
PF3D7_1147500	13.5451	41.4402	56.2403	56.3961	55.9806	40.592	30.5003	20.045
PF3D7_1147400	90.8257	69.2055	49.0047	48.2777	51.203	83.9536	93.8203	95.6552
PF3D7_1147300	57.4347	43.9328	42.9808	44.781	69.6036	79.9377	85.9096	86.6367
PF3D7_1147200	20.3739	17.812	22.1222	17.362	11.9439	8.74156	7.52986	10.2302
PF3D7_1147100	15.5357	12.619	16.8253	24.1821	22.3992	2.93405	2.80422	9.57244
PF3D7_1147000	13.0518	8.79349	8.15302	5.8681	6.17968	6.14506	8.2915	16.081
PF3D7_1146900	53.4187	71.9924	73.0829	70.6076	64.3414	57.9713	63.5278	75.4717
PF3D7_1146800	21.0144	34.395	40.0381	37.5454	24.4418	18.5563	14.3154	11.39
PF3D7_1146700	9.39934	7.68565	8.12706	7.30483	2.92539	7.37407	5.74693	5.07184
PF3D7_1146600	90.2718	71.6981	51.5666	43.5347	39.7611	41.8903	42.6346	55.3921
PF3D7_1146500	12.2901	7.73758	7.72027	9.98788	2.92539	6.92401	7.89337	8.13571
PF3D7_1146300	21.3086	15.7002	10.663	10.9746	7.5991	2.93405	6.50857	5.8681
PF3D7_1146200	72.5463	57.7635	55.3055	61.0871	63.5624	58.3348	36.1779	21.7933
PF3D7_1146100	50.4933	49.8529	47.741	44.2271	29.1674	26.6921	24.4418	16.6869
PF3D7_1146000	57.8155	79.6348	80.8032	82.0495	81.0282	78.501	59.3214	33.7026
PF3D7_1145900	35.9183	39.1553	42.6	46.9794	34.7931	26.8652	26.0516	24.1302
PF3D7_1145800	32.9064	56.448	61.9353	61.0524	59.2349	45.1965	34.2565	25.6015
PF3D7_1145700	26.519	28.1634	19.7594	15.9858	15.9339	23.8013	39.7438	54.4227
PF3D7_1145600	32.6986	23.758	22.5636	16.8167	21.3433	21.5769	32.1101	46.5813
PF3D7_1145500	19.3699	17.9851	13.3633	16.2455	40.5055	46.0447	48.6585	40.7824
PF3D7_1145400	84.0228	68.1149	63.7182	70.1402	63.0777	70.9711	81.7725	91.3969
PF3D7_1145300	52.5532	67.8553	68.3919	67.5783	65.9685	52.1118	44.3137	62.3334
PF3D7_1145200	94.2704	74.987	56.3614	45.1099	24.9697	21.1182	18.7641	83.8671
PF3D7_1145100	62.4546	72.3386	74.3985	73.3945	69.569	64.3414	63.7701	67.1629
PF3D7_1145000	55.4959	32.0409	23.005	18.9199	17.5004	19.2314	19.6296	19.4738
PF3D7_1144900	84.6287	83.2439	84.0575	87.2771	80.1108	81.686	86.6194	93.3876
PF3D7_1144800	31.1754	40.0381	37.0954	32.2659	27.3152	27.4018	29.9636	39.1207
PF3D7_1144700	36.9223	17.9332	24.8053	21.2134	32.1447	56.2056	75.4371	77.4624
PF3D7_1144600	60.1696	71.6289	75.7313	71.4558	67.3187	69.0497	65.4146	67.3187
PF3D7_1144500	34.2219	66.7648	69.067	72.9791	75.5063	78.7952	77.947	66.7821
PF3D7_1144400	8.53384	17.31	18.7294	17.5091	20.6509	14.2635	12.0305	11.113
PF3D7_1144300	95.3955	98.8229	99.7403	99.775	99.8961	99.8961	99.8788	99.6538
PF3D7_1144200	29.5309	61.7968	60.5505	55.1497	43.1885	29.0116	19.768	17.8813
PF3D7_1144100	51.8435	67.6822	58.0232	55.7902	57.2789	75.1428	82.3265	77.8605
PF3D7_1144000	97.1438	99.1518	99.3076	99.3249	99.4807	99.5499	99.3941	99.0306
PF3D7_1143900	24.6322	47.9141	56.0845	59.3041	53.1764	48.4681	35.9356	21.4125
PF3D7_1143800	89.4236	85.1134	80.6301	79.1068	76.7353	74.2167	61.2082	40.2631
PF3D7_1143700	13.6576	14.3154	21.2394	12.8267	14.1596	18.7641	23.1435	21.551
PF3D7_1143600	32.7159	34.4123	36.0568	35.5548	18.0717	10.5418	14.2115	13.623
PF3D7_1143500	56.5172	35.6933	34.8451	23.2301	21.5856	33.0795	51.4627	55.0632
PF3D7_1143400	93.076	96.5553	97.2477	97.7843	97.8536	98.044	97.8882	97.4727
PF3D7_1143300	72.9617	83.7632	85.8404	85.3384	86.2905	84.5075	75.0909	67.9072
PF3D7_1143200	73.3426	48.9354	43.4135	43.4914	51.3242	30.7253	74.987	94.0973
PF3D7_1143100	96.1572	86.3078	63.7009	50.1818	31.3485	26.5536	23.7494	30.3272
PF3D7_1143000	34.0488	16.7388	28.475	11.1823	14.0904	23.4378	31.6081	37.8051
PF3D7_1142900	67.7341	32.0755	19.5603	21.4471	16.4618	14.6962	16.1503	38.2898
PF3D7_1142800	44.0021	40.4189	49.2643	50.5106	53.2283	52.3974	71.1442	72.1309
PF3D7_1142700	37.407	70.2787	75.8871	79.3145	79.73	72.754	63.8567	44.331
PF3D7_1142600	94.2185	97.0746	97.9228	97.8189	98.1305	98.0613	97.6805	96.9188
PF3D7_1142500	88.333	96.1745	96.6419	97.0919	97.0227	97.2304	96.261	94.1665
PF3D7_1142400	61.2948	72.4251	77.3412	76.718	70.9711	70.1056	68.7727	59.7542
PF3D7_1142300	74.1734	53.4707	43.9155	44.9368	56.2749	60.9659	66.2108	79.5569
PF3D7_1142200	19.4045	9.83209	10.1264	24.009	33.5468	36.4376	33.391	23.1089
[truncated: 3,051 more rows]
