# Supplementary material for: A coordinated transcriptional switching network mediates antigenic variation of human malaria parasites
Source: eLife. 2022 Dec 14;11:e83840. doi: 10.7554/eLife.83840 (PMC9833823; doi:10.7554/eLife.83840)
Supplement: Supplementary file 9. — The form was kindly provided by Dr. Silvia Portugal. [file elife-83840-supp9.xlsx]

## Sheet: TableS7
Supplementary File 9: Microarray dataset of Plasmodium falciparum (HB3) gene expression from Bozdech et al. used as the reference to estimate the replication cycle timepoint of RNAseq samples using the method of Lemieux et al.. The form was kindly provided by Dr. Silvia Portugal.
Name	TP1	TP2	TP3	TP4	TP5	TP6	TP7	TP8	TP9	TP10	TP11	TP12	TP13	TP14	TP15	TP16	TP17	TP18	TP19	TP20	TP21	TP22	TP24	TP25	TP26	TP27	TP28	TP30	TP31	TP32	TP33	TP34	TP35	TP36	TP37	TP38	TP39	TP40	TP41	TP42	TP43	TP44	TP45	TP46	TP47	TP48
ITS2	0.651	0.244088	0.640545	0.44402	0.695343	0.707723	0.689	0.651276	1.7114	0.801572	0.841	1.10998	0.585216	0.986	1.26019	1.20083	0.920674	1.356	0.92529	0.953	1.28007	0.932534	0.573774	1.09319	0.757383	0.901	0.922783	0.933217	0.784	0.872648	1.63767	0.982085	0.787744	1.04719	0.723725	0.584146	0.622732	0.427964	0.423083	0.362351	0.37391	0.480721	0.299677	0.186814	0.395275	0.481883
MAL13P1.102	1.532	1.89226	0.88033	1.02972	0.932807	0.589769	0.598	0.712851	0.502359	0.570349	0.522	0.482712	0.558163	0.451	0.617046	0.454399	0.575421	0.718	0.843042	0.895	0.628888	0.549045	0.706391	0.679745	0.901647	0.848	0.788818	0.67145	0.866	0.941106	1.23904	1.00018	1.39851	2.11269	1.7882	1.38987	1.7897	2.6156	2.10746	2.60945	1.34753	1.7082	0.998922	1.1014	1.42626	1.23994
MAL13P1.103	0.52175	0.521301	0.53281	0.371914	0.325752	0.258737	0.21275	0.264951	0.161705	0.234691	0.14375	0.164561	0.249892	0.18725	0.240336	0.233916	0.380052	0.44925	0.500273	0.65525	0.63539	0.814915	1.19333	1.23274	1.78772	1.485	1.81166	1.99127	2.008	1.69433	1.41115	1.53029	1.73539	1.5689	1.49287	1.19668	0.699069	0.814089	0.534257	0.607068	0.572701	0.590694	0.559167	0.654136	0.639489	0.649235
MAL13P1.105	0.5515	0.552684	0.66947	0.45414	0.429871	0.281884	0.386786	0.371819	0.413209	0.299048	0.679	0.289111	0.348852	0.6445	0.685653	0.3481	0.538704	0.9475	0.907195	1.0415	0.899672	1.06909	1.72087	1.39428	1.28239	1.773	1.79231	2.13582	2.0925	1.8051	1.67049	1.23994	1.31098	1.19048	1.24811	0.962743	0.655439	0.817077	0.737553	0.64389	0.693797	0.817225	0.75034	0.771325	0.667813	0.636449
MAL13P1.109	2.261	1.9004	0.960818	0.93611	0.653939	0.648112	0.512	0.471287	0.447698	0.380747	0.291	0.342029	0.43998	0.42	0.526972	0.524486	0.735443	0.853	0.818368	0.935	0.842542	0.809069	0.985159	0.757316	0.604923	0.545	0.489267	0.50919	0.586	0.765072	1.00642	1.40075	1.8448	2.26029	2.31946	2.38237	2.50532	4.03817	3.84415	3.90505	2.2993	2.22975	1.90484	1.29738	1.46151	1.26494
MAL13P1.112	0.539	0.539317	0.56425	0.53257	0.446919	0.645575	0.7	0.715219	0.911013	0.88327	1.151	0.805381	1.04086	0.907	1.11456	0.877259	1.13659	1.34	1.37354	1.561	1.41569	1.30573	2.02084	1.76014	1.62214	1.419	1.46364	1.51233	1.25	1.40903	1.01955	1.00183	0.973378	0.719672	0.891645	0.629926	0.497139	0.65151	0.416259	0.462714	0.447963	0.399064	0.505202	0.535228	0.557665	0.739872
MAL13P1.113	0.349	0.347534	0.340394	0.51992	0.449355	0.37796	0.569	0.857316	1.00992	1.26864	1.224	1.12031	1.5976	1.248	1.30817	1.19265	1.3295	1.471	1.23372	1.393	1.18996	1.05413	1.24137	1.3251	1.34509	1.309	1.29556	1.35635	1.393	1.13745	1.12461	1.04377	0.951256	0.761689	0.721761	0.574991	0.370238	0.521208	0.350295	0.302394	0.38605	0.426722	0.43057	0.567319	0.446887	0.562575
MAL13P1.114	1.262	1.07863	0.647253	0.638832	0.639326	0.583428	0.394	0.551808	0.320156	0.319087	0.224	0.15359	0.189377	0.146	0.146475	0.0665829	0.0898753	0.233	0.100343	0.183	0.0873197	0.1244	0.193062	0.208722	0.367216	0.463	0.655684	1.05155	1.195	1.71671	1.34033	1.87369	2.97592	3.87309	4.2962	4.13755	3.46951	3.52533	2.16318	2.67592	1.60854	1.62391	1.19067	1.20455	1.07253	1.2138
MAL13P1.115	1.044	1.07631	1.05724	1.63566	1.16905	1.29115	1.025	1.33808	2.26322	1.76962	1.583	1.67917	1.64743	1.326	1.341	1.22069	1.02589	1.492	1.02563	1.041	0.912212	0.720212	0.82277	0.791703	0.677055	0.816	0.682311	0.867775	1.056	0.749274	1.11335	1.12932	1.10804	1.06119	1.31095	1.02729	1.07801	1.00416	0.750632	0.628249	0.820659	0.889004	1.04715	1.25612	1.04735	1.11492
MAL13P1.116	1.4565	1.6505	1.5477	2.00884	1.29387	1.67672	1.6045	2.02784	2.06279	2.49181	2.389	1.7095	1.95998	2.1955	1.79389	1.76503	1.73174	1.7895	1.64743	1.2985	1.0692	1.15748	0.893589	1.27712	1.00247	0.8845	0.703113	0.779922	0.643	0.67066	0.613421	0.659659	0.705026	0.659341	0.65204	0.475649	0.508259	0.702913	0.527717	1.04143	0.985155	0.897565	1.12694	0.790808	0.891886	1.10753
MAL13P1.118	0.9965	0.872323	0.695461	0.647687	0.470057	0.655088	0.4675	0.425698	0.406051	0.359166	0.3085	0.216188	0.282641	0.2945	0.224342	0.194492	0.258117	0.359	0.262371	0.2625	0.268926	0.260492	0.455591	0.498613	0.631153	0.8025	0.988518	1.21695	1.506	1.71821	2.0166	2.06904	2.46999	2.69716	2.57428	2.47072	2.04481	2.1715	1.41369	1.39727	1.02825	1.13727	1.04428	0.99596	1.10904	0.934216
MAL13P1.119	1.0425	1.27507	0.826253	1.04174	1.05763	0.719772	0.6595	0.873894	0.6299	0.792323	0.6965	0.63114	0.788832	0.5745	0.603998	0.601582	0.694889	0.6675	0.620972	0.7075	0.590801	0.75061	0.836302	0.898863	0.889762	0.9015	1.02055	1.16585	1.191	1.13294	1.16306	1.12397	1.56972	2.01465	2.01848	1.64532	1.5444	1.78059	1.13391	1.36924	1.02886	1.18666	1.03165	1.14839	1.32996	1.14277
MAL13P1.120	0.819	1.47499	1.16958	1.97089	1.91067	1.25183	1.144	1.31795	1.03595	1.52915	1.487	1.41974	1.84678	1.181	1.32248	1.23587	1.39745	1.375	1.32831	1.307	1.01532	1.42265	1.47774	1.19475	1.15165	1.165	1.14162	0.966386	1.787	0.71166	0.779439	0.634161	0.604995	0.587158	0.552859	0.441314	0.486673	0.389711	0.396015	0.402757	0.457675	0.54789	0.678578	1.05556	0.98441	1.09333
MAL13P1.121	0.809	0.516071	0.7487	0.407334	0.40308	0.443912	0.282	0.285377	0.270701	0.255886	0.255	0.207799	0.347428	0.281	0.253385	0.158864	0.394574	0.459	0.485263	0.632	0.514629	0.77072	1.26753	1.3275	1.51149	1.668	1.67249	1.84402	1.867	1.78968	1.79899	1.83257	1.79382	1.66559	1.31685	1.21316	0.770566	0.773444	0.624389	0.615215	0.69926	0.753349	0.675133	0.553566	0.572771	0.555756
MAL13P1.122	2.117	2.44436	3.27148	2.87031	2.39047	2.10288	1.862	2.14921	1.78559	2.21203	2.059	1.62883	2.07175	1.399	1.72823	1.0957	1.3021	1.646	1.16463	0.932	0.656756	0.693087	0.672109	0.61337	0.580333	0.632	0.494259	0.440163	0.406	0.373132	0.202598	0.388228	0.242383	0.253178	0.327002	0.347009	0.342764	0.535553	0.553875	0.772929	1.12901	1.05363	1.80839	2.26469	1.90336	1.96504
MAL13P1.123	0.6445	0.645089	0.552512	0.506638	0.449964	0.353862	0.264	0.314981	0.223849	0.276696	0.2455	0.282012	0.349564	0.278	0.413749	0.515141	0.482806	0.665	0.660863	0.6655	0.706918	1.06208	0.965311	1.13198	1.23362	1.2105	1.50732	1.66518	1.888	1.94917	1.36285	1.65367	1.8448	2.07929	2.06267	1.71078	1.20752	1.31976	0.736984	0.814638	0.665268	0.640083	0.776174	0.627489	0.575918	0.704072
MAL13P1.124	0.559	0.679958	0.553351	0.373179	0.537034	0.412204	0.265	0.236828	0.118432	0.191144	0.233	0.233612	0.301863	0.358	0.436899	0.421692	0.491026	0.727	0.666209	0.594	0.528563	1.0401	1.0023	1.22434	1.24673	1.39	1.62839	1.54819	1.736	1.5986	1.46602	1.25352	1.90347	2.39927	2.35579	1.82111	1.15127	1.35203	0.903033	0.934553	0.631276	0.857395	0.698097	0.465316	0.518641	0.417101
MAL13P1.126	0.9795	0.89615	0.667374	0.678679	0.531554	0.357667	0.317	0.349321	0.288271	0.353	0.16	0.178113	0.200056	0.153	0.139361	0.114476	0.141869	0.1775	0.14535	0.173	0.265675	0.318483	0.514682	0.561789	0.678284	1.002	1.29847	1.60198	1.8975	2.20494	2.40585	2.43218	2.5229	2.75102	3.04269	2.3343	2.22535	1.87742	1.1123	1.25259	1.02765	0.997002	0.969643	0.848113	1.00392	0.824542
MAL13P1.13	1.04167	0.996497	1.16567	1.39151	1.24131	1.23365	1.03467	1.22677	1.21989	1.38066	1.135	0.84195	0.939763	0.753	0.901016	0.683351	0.872448	1.07833	1.03578	1.17833	1.08221	1.02357	1.70659	1.40747	1.24919	1.48233	1.42952	1.40804	1.29167	1.22597	0.814143	0.744926	0.840003	0.721468	0.734854	0.70653	0.485801	0.553086	0.445072	0.518327	0.658794	0.524622	0.871473	0.990994	0.967626	1.0384
MAL13P1.130	1.5455	1.06759	0.697557	1.03478	0.638108	0.492743	0.4335	0.417409	0.545306	0.302902	0.1925	0.173596	0.152356	0.0745	0.07913	0.0654148	0.0663104	0.0555	0.0452364	0.0425	0.0580583	0.0556527	0.109161	0.136349	0.207379	0.35	0.533367	0.898703	1.173	1.59785	2.40491	2.56091	2.66477	3.57735	3.33385	2.87587	4.60835	3.10812	2.35994	2.47846	1.49564	1.37499	1.43007	1.16959	1.45899	1.16209
MAL13P1.131	0.751	0.692744	0.524845	0.585701	0.393338	0.381765	0.376	0.337479	0.398243	0.522563	0.159	0.294274	0.266266	0.216	0.324938	0.307216	0.48445	0.483	0.771486	1.025	0.857405	1.04945	1.53367	1.605	1.65739	1.729	1.71909	1.55088	1.61	1.84535	2.07381	2.16404	2.10546	2.06636	2.41864	1.67004	1.28602	1.09262	0.66647	0.79248	0.750248	0.840273	0.793396	0.513452	0.630677	0.656906
MAL13P1.132	0.709	1.08619	1.29995	1.14041	1.77489	1.62662	0.9975	1.59148	0.712542	1.74496	1.241	1.67401	2.00554	1.204	1.06026	1.31764	1.5498	1.1505	1.14654	1.0965	1.05852	1.53022	1.28062	1.49984	1.59592	1.1525	1.58512	1.28418	1.193	0.986995	0.982506	0.637862	0.850744	0.865654	0.82487	0.636335	0.484711	0.634774	0.500421	0.564381	0.633097	0.876492	0.719913	1.03206	0.932798	0.886482
MAL13P1.133	0.89225	0.951361	1.19201	0.743828	0.624713	0.775895	0.5345	0.620192	0.421669	0.593857	0.7345	0.504009	0.696279	0.6065	1.03669	0.766287	1.04781	1.53075	1.51999	1.5805	1.51788	1.83233	2.2651	2.07962	2.1533	1.969	1.60322	1.75213	1.55525	1.09626	0.709327	0.870017	0.720896	0.670384	0.746065	0.683488	0.521342	0.725029	0.517453	0.513874	0.767244	0.643705	0.862575	0.915447	0.940666	0.723847
MAL13P1.134	0.576	0.527985	0.523377	0.51739	0.426217	0.367179	0.45475	0.442572	0.463966	0.424679	0.3645	0.300405	0.380889	0.405	0.537705	0.474841	0.632689	0.83625	0.870595	1.229	1.08523	1.36045	1.81176	1.78573	1.84571	1.92675	1.98328	1.98768	1.79975	1.69181	1.40013	1.24509	1.13256	1.19263	1.05416	0.859052	0.608341	0.655096	0.469429	0.515829	0.544172	0.588718	0.582704	0.519756	0.546965	0.561439
MAL13P1.135	1.243	1.38897	1.37835	1.98354	1.30301	1.54355	1.361	1.34163	1.82723	1.70026	1.521	1.0519	1.21173	0.851	0.807295	0.60275	0.657624	0.562	0.4976	0.6	0.45239	0.394713	0.570165	0.523803	0.620497	0.756	0.688967	0.890187	1.124	1.12241	1.14805	1.4756	1.49758	1.40056	1.47789	1.21316	1.45086	1.16913	0.701727	0.967138	0.824301	0.829737	1.07815	1.42919	1.19212	1.17857
MAL13P1.139	0.756	0.705529	0.45358	0.737503	0.372636	0.381765	0.286	0.339848	0.320156	0.223515	0.205	0.166497	0.175138	0.172	0.255068	0.196244	0.280586	0.359	0.513228	0.823	0.6614	0.670639	1.07086	0.962039	1.29017	1.305	1.16326	1.45227	1.699	1.42181	1.96689	2.00612	2.11604	2.33247	2.55808	1.66546	1.80671	1.54928	0.979233	1.17699	0.786667	0.870565	0.882955	0.679637	0.845939	0.651224
MAL13P1.14	1.47	1.62841	2.05075	1.59898	2.08603	1.77565	1.54	2.21434	1.44721	2.40317	1.912	2.19544	2.77088	1.607	1.91343	1.83512	2.37073	1.747	1.45003	1.423	1.34231	1.32164	1.1295	0.989229	0.890991	0.697	0.790482	0.45092	0.363	0.299409	0.230736	0.189179	0.258734	0.343676	0.36039	0.390957	0.384629	0.509254	0.558425	0.832886	1.04525	1.25909	1.17919	1.24237	1.31926	1.37064
MAL13P1.140	0.563	0.576512	0.502208	0.431369	0.387249	0.399521	0.222	0.300771	0.309744	0.305214	0.277	0.276204	0.347428	0.262	0.391441	0.202085	0.369365	0.69	0.4244	0.597	0.522989	0.594876	1.04019	1.02362	1.37788	1.434	1.58845	2.18199	2.533	1.91832	1.25311	1.57841	1.78228	1.33592	1.52012	0.987006	0.784957	0.779421	0.464027	0.641283	0.70533	0.670375	0.744024	0.85499	0.806914	0.609173
MAL13P1.141	0.823	0.767133	0.477894	0.626181	0.407951	0.398253	0.244	0.241564	0.268098	0.172646	0.12	0.126486	0.145236	0.088	0.144791	0.107467	0.184135	0.262	0.238519	0.457	0.54807	0.469541	0.852541	0.911658	1.03771	1.284	1.23066	1.64232	1.785	1.76786	2.10101	2.03902	2.20645	2.28507	2.31258	2.10128	2.05397	2.05973	1.25901	1.68532	0.888643	0.989099	0.94955	1.00627	0.988187	0.719415
MAL13P1.142	0.6045	0.63056	0.529875	0.750153	0.622277	0.639868	0.6295	0.873894	1.08801	1.10293	1.084	0.97446	1.32279	1.007	1.27576	1.18564	1.24346	1.21	1.35298	1.6185	1.59033	1.3048	1.76372	1.35789	1.40821	1.4775	1.4341	1.32721	1.295	1.23788	1.19495	0.933968	0.926729	0.809632	0.860221	0.736592	0.722814	0.700523	0.519187	0.614563	0.552367	0.57028	0.61428	0.645254	0.666554	0.65577
MAL13P1.143	0.665	0.710179	0.640545	0.760273	0.556518	0.903045	0.721	0.873894	1.16219	1.07441	1.143	0.699546	0.926949	0.788	1.27871	0.879595	0.93821	1.229	1.64003	1.565	1.50394	1.24307	1.77094	1.68177	1.54182	1.819	1.43036	1.43165	1.408	1.40451	1.20902	1.25681	1.17152	0.857574	0.817996	0.665634	0.434343	0.451873	0.388964	0.454894	0.424897	0.433307	0.624613	0.733503	0.741455	0.795561
MAL13P1.144	0.7975	0.917653	1.10041	1.6072	1.37546	1.19539	1.4325	1.61931	2.15845	2.1442	1.7585	1.52042	1.97493	1.4465	1.63437	1.32991	1.29826	1.5515	1.42248	1.4445	1.39294	1.14252	1.2098	1.24713	1.21067	1.163	1.09669	1.03183	0.961	0.916281	0.996575	0.720114	0.648277	0.536522	0.525855	0.40698	0.317907	0.363411	0.272388	0.363003	0.421863	0.527476	0.793971	0.739807	0.823279	0.934784
MAL13P1.146	0.567	0.612544	0.786988	0.857257	0.794388	1.01508	0.917667	1.22124	1.28106	1.49781	1.429	1.20506	1.47847	1.32867	1.39263	1.30985	1.50486	1.67233	1.68444	1.95733	1.52128	1.53458	1.61396	1.41147	1.28225	1.453	1.14245	1.11878	1.006	0.817982	0.662507	0.630871	0.52388	0.433455	0.526673	0.504185	0.63189	0.537944	0.406024	0.509638	0.635323	0.501793	0.838941	1.00838	0.916853	0.757298
MAL13P1.147	0.5635	0.586973	0.503884	0.393419	0.283739	0.318983	0.24	0.331559	0.193916	0.299819	0.233	0.212961	0.282641	0.333611	0.309786	0.24881	0.401699	0.533	0.846332	0.9285	0.984669	1.13924	1.78808	1.67537	1.90452	1.9405	1.90506	1.8624	2.095	1.5418	1.53824	1.4904	1.51778	1.2298	1.15138	0.873015	0.590026	0.629992	0.430476	0.471187	0.548118	0.597279	0.833583	1.15756	1.08512	1.04275
MAL13P1.148	0.764	0.563726	0.544966	0.535101	0.372636	0.410936	0.422	0.496154	0.698877	0.779991	0.783	0.944774	1.36835	1.137	1.65331	1.27208	1.54213	1.533	1.37848	1.359	1.0209	0.940952	1.12319	0.927652	0.856565	1.133	1.06174	1.15644	1.057	1.54519	0.928573	0.988665	1.10226	1.01164	1.09983	0.983344	1.06623	1.16913	0.766554	0.88763	0.732038	0.566329	0.789952	0.730065	0.814468	0.608036
MAL13P1.152	1.233	0.987974	0.897099	0.800753	0.663681	0.492109	0.591	0.556545	0.6299	0.474777	0.647	0.371714	0.367362	0.58	0.377972	0.164705	0.141389	0.342	0.175188	0.211	0.179284	0.194551	0.427624	0.437436	0.462299	0.715	0.903645	1.18871	1.36	1.79043	2.14228	2.11798	2.41036	2.63198	3.3476	2.52428	2.84939	2.0143	1.58201	1.62406	1.26862	1.26831	1.13096	0.940947	1.03351	1.049
MAL13P1.158	1.15	1.19719	0.749539	1.1208	1.10208	0.968997	0.543	0.832449	0.927932	1.06979	0.349	0.659535	0.61227	0.225	0.22813	0.420524	0.449376	0.172	0.156271	0.18	0.239665	0.245994	0.453786	0.474222	0.58853	0.714	1.05009	1.20753	1.516	1.38947	2.15354	1.57677	2.37285	3.06938	3.02354	2.40434	2.45037	2.00713	1.55017	1.44289	1.25527	1.45533	0.993181	1.14381	1.2966	1.01377
MAL13P1.159	0.598	0.576512	0.520653	0.752683	0.614971	0.760993	0.711	0.890472	1.14527	1.25168	1.373	1.15257	1.20318	1.152	1.38898	1.03262	1.1081	1.278	1.12844	1.463	1.39804	1.02887	1.44887	1.41787	1.3369	1.616	1.3538	1.28284	1.389	1.32627	1.17526	1.08901	0.956065	0.994398	0.847456	0.629926	0.66198	0.506863	0.424221	0.44186	0.506235	0.507062	0.72795	0.637231	0.689843	0.793288
MAL13P1.16	0.488	0.355671	0.326141	0.409864	0.309312	0.337373	0.289	0.346952	0.399544	0.340668	0.395	0.211671	0.313254	0.329	0.401543	0.369126	0.518427	0.718	0.586428	0.858	0.875055	0.890444	1.49127	1.56501	1.62296	1.883	1.88051	2.01076	1.719	2.20419	2.01941	1.59733	1.30906	1.38763	1.34631	0.785576	0.697303	0.63836	0.50952	0.507031	0.600927	0.495208	0.640688	0.58451	0.557665	0.595534
MAL13P1.160	0.496	0.477714	0.436812	0.5098	0.322707	0.33991	0.205	0.234459	0.255084	0.274384	0.257	0.227159	0.326069	0.291	0.463837	0.314225	0.485546	0.588	0.764906	0.962	0.887131	0.878284	1.42541	1.49224	1.59264	1.652	1.63172	1.60556	1.798	1.82654	1.65643	1.65819	1.64666	1.30575	1.18722	1.03645	0.668521	0.674223	0.497009	0.559168	0.539013	0.504427	0.580982	0.659007	0.673478	0.55121
MAL13P1.161	0.467	0.461442	0.426751	0.44655	0.271561	0.318349	0.259	0.243932	0.266797	0.302131	0.261	0.291693	0.374482	0.303	0.394808	0.365622	0.525003	0.539	0.676901	0.997	0.997674	0.903538	1.72313	1.51623	1.63444	1.595	1.85805	1.93098	2.118	1.9281	1.73052	1.61542	1.48507	1.38871	1.3355	0.911012	0.678987	0.711281	0.512932	0.603484	0.554795	0.485989	0.559167	0.662445	0.64956	0.615992
MAL13P1.164	0.329	0.339398	0.327818	0.309928	0.238682	0.183907	0.407	0.183541	0.127542	0.192686	0.195	0.145846	0.230669	0.381	0.53034	0.452063	0.693793	0.814	1.20329	1.211	1.63121	1.26458	2.14985	1.78493	1.96067	2.186	2.22916	2.04483	2.183	1.66104	1.51104	1.09724	1.00319	1.06874	1.03011	0.842343	0.665905	0.590543	0.46289	0.517458	0.509877	0.501793	0.475349	0.492823	0.528712	0.373914
MAL13P1.165	0.487	0.478877	0.429266	0.433899	0.267908	0.23261	0.231	0.255774	0.192614	0.175729	0.176889	0.100673	0.229245	0.2729	0.503402	0.281517	0.361693	0.986	0.862782	1.238	0.599162	1.20752	1.39294	1.44266	1.35083	1.888	1.6026	1.90857	1.893	2.49382	1.6114	2.053	2.06506	1.6936	1.61046	1.1628	0.671138	0.824847	0.511794	0.633463	0.517161	0.406966	0.683171	0.601702	0.47584	0.561439
MAL13P1.166	1.1125	1.08445	1.11802	1.49019	1.01866	1.44081	1.0995	1.55063	1.53115	1.7596	1.398	1.07771	1.28292	1.178	1.24504	1.01101	1.00452	1.007	0.808498	0.886	0.725032	0.702908	0.57648	0.66535	0.669268	0.707	0.593277	0.751235	0.6525	1.22848	0.929511	1.29259	1.34897	1.68013	1.60555	1.65081	1.89567	1.88878	1.25162	1.43898	0.928705	1.12278	1.31754	1.46815	1.30793	1.28085
MAL13P1.167	0.5995	0.602083	0.512688	0.600249	0.370809	0.421717	0.299	0.32327	0.299984	0.235847	0.24	0.214897	0.299728	0.2995	0.424272	0.31364	0.422523	0.548	0.526798	0.77	0.797953	0.743128	1.23325	1.12358	1.24509	1.502	1.58388	1.73241	1.8805	1.97061	2.00816	1.82064	1.67792	1.67205	1.48968	1.08406	0.996241	0.845767	0.662489	0.710364	0.710793	0.628888	0.623465	0.660726	0.701172	0.589852
MAL13P1.169	1.7165	1.36166	1.31211	1.48386	1.13739	1.59808	1.1935	1.67378	2.01659	1.64168	1.4	1.05255	0.842939	0.9245	0.849385	0.853896	0.984792	0.6515	0.830705	0.7885	0.859727	0.986784	0.685191	1.00282	0.906565	0.799	0.641122	0.642315	0.6095	0.834282	1.4346	1.30904	1.46969	1.24057	1.19508	1.06346	1.18921	1.43033	1.12993	1.53608	1.33539	1.63774	1.18608	0.683648	0.90951	0.895575
MAL13P1.170	1.237	1.33435	1.21402	1.62301	1.18123	1.62599	1.254	1.53227	1.63462	1.7835	1.799	1.7992	2.02192	1.31	1.80905	1.2861	1.40184	1.482	1.55613	1.474	1.33023	1.05226	1.32618	1.17716	1.02624	0.971	0.936097	0.879429	0.814	0.659752	0.584345	0.537104	0.52901	0.466494	0.475282	0.315879	0.418644	0.468609	0.494735	0.732523	0.868005	0.917979	0.94955	0.966161	1.04861	1.00582
MAL13P1.171	0.818	1.07805	0.839668	1.42567	1.03388	1.23217	1.103	1.42629	1.78559	1.6887	1.461	1.55914	1.49437	1.099	1.21599	1.08927	1.03028	0.905	1.04702	0.9965	1.18253	0.965739	0.950877	1.14037	1.07747	1.0315	0.952738	1.04438	1.041	1.11714	1.24654	1.04748	0.965202	0.888817	0.872496	0.660598	0.580214	0.527185	0.367355	0.394285	0.454033	0.546573	0.699819	0.679064	0.764114	0.892733
MAL13P1.172	1.175	1.18906	1.52339	1.76216	2.02636	2.31849	1.707	2.53761	2.24239	2.41859	1.764	2.00571	1.89234	1.364	1.20968	1.30946	1.22428	0.884	0.949964	0.941	1.05805	1.01484	0.760521	0.958041	0.976238	0.846	0.774672	0.805919	0.684	0.765072	1.01393	0.757538	0.933943	0.832795	0.719797	0.556679	0.650206	0.530771	0.401474	0.538313	0.577861	0.745446	0.729098	0.893957	0.863562	1.02059
MAL13P1.174	0.859	0.633466	0.759599	0.600881	0.572349	0.651917	0.623	0.63825	0.459411	0.48865	0.443	0.309762	0.374482	0.439	0.394808	0.345764	0.528291	0.556	0.400548	0.477	0.523918	0.491989	0.678424	0.820492	0.931155	0.942	1.20985	1.55536	1.605	1.39022	1.58233	1.32261	1.67071	1.51261	1.45629	0.918337	0.837287	0.865492	0.807498	0.851134	1.69595	1.52777	1.60976	2.11684	1.2601	1.50361
MAL13P1.176	2.969	2.41531	1.58963	2.02402	1.43818	0.852312	1.047	0.909418	0.714494	0.653589	0.743	0.484003	0.397264	0.249	0.196141	0.148351	0.167694	0.16	0.110212	0.062	0.161634	0.205775	0.0739771	0.0415844	0.063935	0.2	0.0931936	0.164949	0.303	0.507039	0.770059	1.20252	1.71784	2.59858	2.6553	3.0068	3.94964	4.67294	5.83559	8.58433	4.66052	4.13815	3.15751	2.36096	3.23018	2.17643
MAL13P1.178	1.175	1.14954	1.27313	1.36938	1.21655	1.10724	0.9195	1.21374	1.16805	1.0721	1.018	0.847973	1.03232	0.7625	0.939038	0.756358	0.802301	0.8735	1.02193	0.837	0.77891	0.816552	1.2098	1.01242	1.13444	1.1395	1.03844	1.07351	1.158	1.08216	1.20996	0.969336	1.24606	1.09028	1.1283	1.0163	0.825513	1.20141	0.921799	1.21805	1.09563	1.18731	1.06322	1.06816	1.09519	0.888187
MAL13P1.179	1.625	1.6133	1.72671	2.52497	1.7341	2.03312	1.931	2.09888	2.68358	2.2128	1.785	1.68627	1.77985	1.356	1.31533	1.14768	1.1766	1.0505	0.977929	1.0735	0.994423	0.87922	0.98155	0.93205	0.851237	0.9715	0.852056	0.781267	0.8275	0.864373	0.895276	0.709421	0.756965	0.685197	0.657932	0.532873	0.593296	0.580382	0.571504	0.638025	0.977871	1.00359	1.14646	1.27561	1.28779	1.2746
MAL13P1.180	0.376	0.338236	0.316081	0.270713	0.216762	0.21181	0.174	0.239196	0.219945	0.348375	0.357	0.45948	0.696279	0.566	0.745843	0.82703	1.07412	1.093	0.964769	1.347	1.30051	1.50403	1.92431	1.77693	2.07625	1.799	2.13846	2.04214	2.107	1.3511	1.4407	1.32754	1.21768	0.964232	0.977078	0.706835	0.446117	0.465023	0.390101	0.537009	0.390906	0.457014	0.401865	0.508868	0.371357	0.396644
MAL13P1.184	0.403	0.278957	0.378961	0.347879	0.278868	0.442644	0.328	0.457077	0.694973	0.693668	0.897	1.03383	1.63747	1.601	1.92438	2.28601	2.58775	3.009	2.64263	2.92	2.77101	2.50391	1.66088	1.93447	1.91723	1.626	1.18572	1.07934	0.804	0.686834	0.652815	0.639918	0.45591	0.327516	0.370209	0.237138	0.235487	0.34548	0.238837	0.289359	0.444321	0.201508	0.614279	0.25558	0.348698	0.403463
MAL13P1.188	1.569	1.30994	1.03124	1.17393	0.913323	0.870068	0.533	0.759032	0.668944	0.565725	0.685	0.427213	0.719061	0.45	0.525289	0.134334	0.21044	0.647	0.32817	0.291	0.132837	0.247865	0.210203	0.18633	0.297543	0.432	0.454319	1.039	0.983	0.90951	1.25029	1.32754	2.02274	2.09545	1.93844	2.12875	2.30385	2.19003	1.61613	1.91733	2.44134	2.72496	2.41693	1.9988	2.05065	1.42746
MAL13P1.19	0.373	0.382695	0.406838	0.325425	0.242031	0.227664	0.265	0.229131	0.165934	0.301745	0.175	0.162948	0.273386	0.2895	0.485303	0.476593	0.653788	1.039	0.961685	1.09475	0.939616	1.31602	1.87334	1.89489	1.9703	2.0255	2.09124	2.03631	1.9845	1.92095	0.893869	1.22617	1.25279	1.07385	1.05883	0.90941	0.540312	0.633877	0.398347	0.485524	0.381801	0.344736	0.481951	0.448125	0.410696	0.514842
MAL13P1.190	0.53	0.516071	0.408306	0.561666	0.436568	0.450254	0.3785	0.483128	0.637058	0.638945	0.604	0.625332	0.924813	0.5615	0.801823	0.634874	0.689957	0.761	0.754625	0.922	0.885738	0.786153	1.22198	1.00682	1.07952	1.397	1.32302	1.56029	1.6435	1.54368	1.50635	1.70796	1.68033	1.49483	1.40326	1.16646	0.991008	0.881033	0.520324	0.618473	0.536585	0.574231	0.628058	0.709435	0.672848	0.623379
MAL13P1.191	1.018	0.733425	1.02873	0.857679	0.999784	0.927143	1.431	1.01599	1.11013	1.12837	1.518	1.02609	1.07646	1.199	1.39404	0.704377	0.996958	0.96	1.10697	0.836	0.914999	0.706182	1.70418	1.18276	1.2164	1.268	1.03844	1.48992	1.495	1.26158	0.750362	1.13343	1.1542	0.973928	0.965294	1.15914	0.965497	1.05915	0.707414	0.709061	1.1448	0.84159	1.05059	1.41543	0.926504	0.946718
MAL13P1.193	0.945	0.813625	0.725225	0.47438	0.463968	0.398253	0.29	0.284193	0.195217	0.235847	0.204	0.185857	0.351699	0.274	0.47478	0.398329	0.49541	0.672	0.591363	0.813	0.683695	1.13924	1.58961	1.40187	1.691	1.47	1.66168	1.69252	1.784	1.49629	1.55419	1.24118	1.50912	1.33376	1.02618	1.04286	0.727393	0.933632	0.806361	0.905878	0.826729	0.989099	0.766988	0.853844	0.771667	0.764875
MAL13P1.194	0.581	0.536993	0.420882	0.298543	0.371418	0.338642	0.188	0.217881	0.156174	0.192686	0.152	0.179404	0.227821	0.202	0.296317	0.334083	0.424167	0.472	0.541192	0.648	1.11751	1.23091	1.33971	1.48584	1.90985	1.549	1.74738	1.62529	1.965	1.50983	2.14416	1.47395	2.15644	1.90799	1.84025	1.16555	0.887001	0.797352	0.572072	0.686903	0.563293	0.725691	0.474201	0.532936	0.43304	0.452333
MAL13P1.195	1.203	1.06817	0.967944	0.862106	0.737965	0.663966	0.7275	0.887511	0.873271	0.977301	0.925	0.826032	0.954714	0.836	0.981549	0.79549	0.953007	1.141	1.62481	1.2795	1.10079	1.12568	1.50796	1.17276	1.27788	1.296	1.281	1.39848	1.434	1.02799	1.16259	0.95083	1.07774	1.17701	1.1283	0.942142	0.974916	1.13865	1.00425	1.21153	1.03784	1.28939	1.0127	0.985645	0.983781	0.917737
MAL13P1.196	0.575	0.523045	0.634676	0.385829	0.322707	0.327227	0.207	0.266431	0.251179	0.191144	0.202	0.157462	0.143812	0.304	0.369554	0.171714	0.272914	0.567	0.753392	0.732	0.890847	0.847418	1.48496	1.37165	1.67706	2.068	1.75487	2.0009	2.141	1.89801	2.02785	1.41391	1.68033	1.39625	1.38068	1.11153	0.81243	1.05796	0.601643	0.64389	0.647058	0.6414	0.675133	0.687659	0.613054	0.619401
MAL13P1.201	0.518	0.722964	0.489631	0.49462	0.493194	0.333568	0.276	0.310244	0.210834	0.491733	0.809	0.481422	0.6379	0.487	0.808137	0.636626	1.01932	1.098	1.51419	1.691	1.57454	2.49081	2.51342	2.51266	2.30658	2.132	1.81312	1.69521	1.783	0.914776	0.950146	0.900656	0.865652	0.746606	0.706049	0.574075	0.370238	0.533162	0.309351	0.215064	0.508663	0.645351	0.465015	0.758718	0.735161	0.712596
MAL13P1.202	0.469	0.454468	0.411659	0.335228	0.365329	0.388106	0.216	0.269983	0.127542	0.221974	0.189	0.211671	0.340308	0.255	0.441108	0.238297	0.404439	0.424	0.310897	0.419	0.443101	0.608906	0.720826	1.0604	1.60493	1.317	1.62007	1.70597	1.909	1.5986	1.29719	1.31767	1.96311	1.80241	1.74597	1.40268	0.703844	0.876251	0.634625	0.641283	0.648272	0.673009	0.539647	0.882496	0.658372	0.722824
MAL13P1.203	1.087	1.61911	1.03376	1.24224	1.45888	0.948704	1.134	1.25282	1.31446	1.27635	1.185	1.28422	0.865721	0.976	1.11371	0.745261	0.688313	1.125	0.977106	0.568	0.801669	0.576169	1.37579	1.00922	0.829515	0.741	0.711434	1.31045	1.341	0.672541	0.788818	0.659659	0.784858	1.09028	0.890663	0.734303	0.983812	0.80333	0.839343	0.871989	1.37181	0.878468	0.723357	0.963869	1.00959	0.919442
MAL13P1.204	1.155	1.11002	1.44793	1.61289	1.21533	1.39008	1.384	1.45175	2.06149	1.94535	1.69	1.71144	1.61184	1.32	1.32669	1.23354	1.29004	1.047	1.42454	1.553	1.53367	1.15327	1.67351	1.3195	1.0746	1.004	0.970212	0.807712	0.893	0.759806	0.79257	0.736975	0.605957	0.545141	0.578391	0.390957	0.345381	0.419596	0.234288	0.419702	0.566935	0.666424	0.739432	0.836652	0.930281	0.941035
MAL13P1.205	0.817	0.642183	0.724805	0.604044	0.524247	0.486401	0.4005	0.440499	0.566129	0.479402	0.363	0.311053	0.361667	0.147	0.401122	0.300791	0.37649	0.4165	0.403838	0.5063	0.490012	0.527064	0.664892	0.938448	1.13567	1.252	1.29057	1.61453	1.683	1.58807	1.83886	1.6985	1.80633	1.81911	1.58296	1.25619	1.04203	0.998783	0.731297	0.814638	0.785453	0.749397	0.75034	0.684794	0.633195	0.71771
MAL13P1.206	1.956	1.39827	1.00358	1.62554	1.15444	1.1491	1.114	1.19716	1.53831	1.42279	1.079	1.27519	1.2815	1.093	1.28123	1.01393	0.968899	1.176	0.952432	0.83	0.900136	0.827776	0.542198	0.704536	0.621317	0.61	0.605759	0.588079	0.565	0.859107	0.963278	1.07092	1.15132	1.41888	1.31685	1.2333	1.70074	1.79195	1.88682	2.38396	1.84527	1.76484	1.59942	1.08192	1.16442	1.28199
MAL13P1.209	0.82	0.935669	1.05556	1.41175	1.41017	1.62472	1.453	2.04145	2.37905	2.54653	1.998	2.53618	2.57296	1.791	1.80989	1.77204	1.87971	1.519	1.8917	1.735	1.9554	1.37682	1.65997	1.27392	1.16804	1.12	1.00266	0.857914	0.812	0.607092	0.737231	0.4968	0.443406	0.414781	0.405561	0.314047	0.291742	0.25104	0.260447	0.361048	0.452819	0.520232	0.546536	0.716312	0.708725	0.785332
MAL13P1.21	0.664	0.568375	0.497177	0.4592	0.425	0.353862	0.296	0.290114	0.1796	0.22814	0.145	0.109707	0.165171	0.2	0.154051	0.11214	0.189615	0.325	0.377518	0.552	0.493263	0.562139	0.986061	0.974035	1.19755	1.254	1.65419	1.85119	1.916	1.9612	1.61234	1.86136	2.03909	2.28722	2.35481	1.89527	1.71644	1.53493	1.02131	1.03622	0.820659	0.771787	0.904771	0.786224	0.754043	0.750101
MAL13P1.210	0.714	0.714828	0.713487	0.600881	0.478581	0.560598	0.483	0.455893	0.49455	0.368415	0.549	0.290402	0.29332	0.441	0.695334	0.551353	0.583093	0.705	1.01823	1.024	1.06084	1.01017	1.40105	1.49544	1.58936	1.955	1.25728	1.52488	1.7	1.74605	1.43319	1.69356	1.55625	1.28852	1.22847	0.943973	0.769257	0.969495	0.535678	0.551347	0.615252	0.634815	0.655614	0.758718	0.635713	0.662589
MAL13P1.212	2.978	2.68671	1.54226	1.72674	1.25369	0.916996	0.801	0.895208	0.855051	0.783074	0.6825	0.629204	0.722621	0.861	0.697439	0.398913	0.550212	0.697	0.53379	0.6085	0.483045	0.485909	0.598132	0.610171	0.620087	0.6715	0.623648	0.608698	0.69	0.572864	0.723631	0.792084	0.941637	1.06712	0.993281	0.878051	1.31742	1.58215	1.5297	2.56057	3.64259	4.37456	2.95888	2.33174	3.14709	1.41951
MAL13P1.213	1.577	1.71326	1.27354	2.11763	1.71705	1.74901	1.418	1.72766	2.60289	2.17349	1.651	1.71144	1.90089	1.383	1.55566	1.40875	1.44896	1.514	1.61617	1.427	1.65629	1.25242	0.88141	0.941247	0.822958	0.721	0.664005	0.529809	0.427	0.534121	0.565586	0.47048	0.397238	0.452489	0.451714	0.377223	0.485365	0.497299	0.566386	0.69342	0.96998	0.961441	1.16311	0.678491	1.05365	0.898984
MAL13P1.214	0.614	0.760159	0.568442	0.690697	0.467621	0.396984	0.417	0.420369	0.559622	0.545685	0.432	0.495619	0.626509	0.476	0.75847	0.721899	0.93273	1.096	0.942562	1.423	1.14537	0.93534	1.56254	1.25073	1.45165	1.334	1.24896	1.05783	1.168	1.10736	1.28875	1.34646	1.3533	1.11614	1.26284	0.808466	0.576943	0.575002	0.371904	0.557864	0.395762	0.488623	0.54424	0.566173	0.691102	0.544391
MAL13P1.215	0.895	0.838034	0.518976	0.53004	0.411604	0.429961	0.293	0.356426	0.222547	0.212725	0.13	0.112289	0.109639	0.07	0.0446159	0.0560698	0.0800109	0.084	0.136532	0.179	0.306548	0.299309	0.580991	0.770911	1.05493	0.831	1.28557	1.49261	1.673	1.53842	2.61501	2.17309	3.06441	2.312	2.73778	2.20291	1.94146	1.60785	1.0088	1.26432	0.887429	1.3447	0.989736	1.19194	1.29283	1.00127
MAL13P1.216	0.912	0.932957	1.06925	1.33079	1.18773	1.03833	0.958333	1.16006	1.01556	1.16536	0.987	0.883682	0.95068	0.664	0.802244	0.529548	0.670411	0.875	1.33598	1.28167	1.08468	1.08219	1.68373	1.2358	1.65821	1.521	1.33411	1.3426	1.495	1.26358	1.12648	1.02815	1.03878	0.759894	0.829125	0.521581	0.37111	0.480165	0.369629	0.372344	0.507854	0.540866	0.700393	0.877912	0.883704	0.863752
MAL13P1.217	0.549	0.452143	0.567604	0.457935	0.415258	0.371618	0.238	0.335111	0.350089	0.319087	0.301	0.259426	0.374482	0.392	0.498351	0.474257	0.555692	0.631	0.770664	0.75	0.899207	1.02607	1.34963	1.3219	1.50247	1.542	1.76985	1.76693	1.715	1.81225	2.24171	1.90824	1.76401	1.69145	1.59769	1.09688	0.808505	0.859515	0.607329	0.680386	0.653128	0.665107	0.729098	0.609725	0.715019	0.679637
MAL13P1.218	0.6385	0.369618	0.720194	0.340288	0.439613	0.38113	0.3585	0.354649	0.607776	0.453967	0.5175	0.57306	0.637188	0.693	1.12087	0.815348	1.04069	1.4945	1.39575	1.552	1.34324	1.46427	2.40922	1.64378	1.61436	1.6615	1.60884	1.36621	1.303	0.976463	0.980161	0.707365	0.75456	0.750916	0.683955	0.667923	0.597875	0.756708	1.12879	0.586539	0.848581	0.755983	0.699245	0.842383	0.908251	0.816018
MAL13P1.22	1.292	1.03912	0.809066	0.697022	0.409169	0.465474	0.38	0.403791	0.396941	0.32217	0.392	0.165206	0.239213	0.328	0.526131	0.307216	0.436224	0.507	0.843865	0.82	0.921502	0.927857	0.946366	1.28752	1.29263	1.119	1.08587	1.30794	1.017	1.318	1.83839	1.34893	1.57645	1.69683	1.65465	1.36698	1.63009	1.85053	1.21921	1.57193	1.21399	1.07866	1.05289	0.67276	0.819503	0.798971
MAL13P1.225	2.703	2.05615	2.08261	2.0936	2.10795	1.85302	1.605	1.69805	2.49618	2.00239	1.662	1.93085	1.66594	1.493	1.67099	1.40525	1.29881	1.514	1.26909	1.23	1.21876	0.862383	0.601741	0.610971	0.51066	0.437	0.375271	0.262663	0.224	0.317463	0.362988	0.439224	0.480918	0.669037	0.741401	0.700426	1.08978	1.25759	1.46373	2.21582	3.16124	3.03052	2.72809	1.41429	1.84923	1.5593
MAL13P1.226	0.427667	0.430447	0.357163	0.244148	0.356399	0.27438	0.164	0.263273	0.111491	0.249207	0.168333	0.24824	0.369735	0.283667	0.276394	0.374188	0.483719	0.477	0.529129	0.606667	0.728283	1.07938	1.34151	1.50637	2.10357	1.49867	2.14512	2.09682	2.166	1.39649	1.56826	1.07092	1.73098	1.73526	1.36758	1.14907	0.709514	0.795201	0.531129	0.622601	0.515947	0.658082	0.465015	0.634175	0.583261	0.60349
MAL13P1.227	0.669	0.790379	0.573472	0.719792	0.655157	0.479425	0.239	0.42629	0.501057	0.64434	0.379	0.450446	0.504055	0.567	0.569063	0.657652	0.837375	0.577	0.984509	1.109	1.11936	1.29919	1.44255	1.82971	1.56231	1.804	1.56765	1.49171	1.625	1.42708	2.33363	1.84573	1.62454	1.48352	1.49164	1.07032	0.829437	0.586957	0.435594	0.457501	0.622778	0.703301	0.672837	0.532936	0.52997	0.529616
MAL13P1.228	1.488	1.25473	0.558381	1.03162	0.71361	0.703284	0.549	0.501482	0.612331	0.272072	0.228	0.168433	0.155915	0.0945	0.122483	0.0794322	0.0887792	0.152	0.0830705	0.1385	0.0938222	0.094937	0.165095	0.169536	0.189756	0.3415	0.399401	0.770061	0.9485	1.53466	2.29658	2.96188	3.12212	3.37858	2.75448	3.048	3.9359	3.54804	2.33947	3.04935	1.91265	1.73125	1.95823	1.57646	1.75985	1.32404
MAL13P1.229	0.486	0.431803	0.340394	0.342819	0.225895	0.221956	0.1755	0.180581	0.201074	0.204247	0.1655	0.192311	0.313966	0.296	0.431006	0.36679	0.478421	0.697	0.701987	1.013	0.889918	1.01204	1.52194	1.40627	1.52378	1.834	1.82892	1.87226	1.8915	2.02327	1.95094	1.83175	1.71688	1.44365	1.28002	1.03736	0.737205	0.741167	0.524305	0.667352	0.556616	0.520891	0.547685	0.526059	0.518641	0.523366
MAL13P1.233	1.397	1.57843	1.2878	2.06324	1.63789	1.66404	1.453	2.16105	2.04327	2.16424	1.735	2.16704	2.63703	1.523	1.71476	1.66924	1.53336	1.559	1.31432	1.39	1.61077	1.09435	1.5048	1.03321	0.99673	0.898	0.920287	0.742271	0.73	0.597313	0.576841	0.486108	0.439559	0.424477	0.400651	0.338768	0.340148	0.430355	0.404886	0.628249	0.878931	0.900857	1.11604	1.66757	1.4892	1.30245
MAL13P1.234	0.753	0.624748	0.83338	0.821626	0.834168	0.806652	0.8395	1.01599	0.894745	1.2486	0.9755	1.0377	1.33703	1.0575	1.00007	0.914055	0.956843	1.071	0.821658	0.715	0.70506	0.763237	0.926067	0.93365	0.974598	0.9965	1.12956	1.30704	1.1835	1.47335	1.09928	1.33782	1.47113	1.77171	1.84319	1.38712	1.06165	1.26118	0.858677	0.933901	0.744178	0.779689	0.93979	0.891665	0.856639	0.934784
MAL13P1.237	1.635	1.65398	1.6961	1.59898	1.56848	1.52579	1.411	1.80936	1.68277	2.18891	1.465	1.75661	2.25258	1.24	1.66257	1.40992	1.4402	1.365	1.14571	1.291	1.17231	1.34221	1.59502	1.07	1.15657	1.167	1.09086	0.774543	0.781	0.504782	0.55902	0.386583	0.386658	0.380306	0.446805	0.379054	0.440884	0.557071	0.659646	0.888933	0.959055	1.20905	1.22856	1.99421	1.96253	1.53089
MAL13P1.24	1.0655	1.28611	0.991001	1.28842	1.05702	1.34442	1.049	1.54885	1.48886	1.61239	1.5375	1.08804	1.23451	1.149	1.29849	1.07701	1.08453	1.281	1.42659	1.3235	1.1398	1.07564	1.11823	1.24273	1.08566	1.1755	0.924032	0.820263	0.7515	0.788769	0.869013	0.929033	0.84882	0.82256	0.701139	0.665176	0.747017	1.00297	0.643724	0.784008	0.755104	1.07141	0.823249	1.02576	1.01966	0.936489
MAL13P1.241	0.943	0.977513	0.798166	0.752683	0.493194	0.51367	0.291	0.359978	0.331869	0.217349	0.424	0.177984	0.12815	0.341	0.348509	0.112957	0.150157	0.422	0.287868	0.293	0.285182	0.215128	0.606252	0.495014	0.623776	1.117	0.944418	1.49082	1.922	1.67157	2.21826	1.83257	2.23915	2.66106	2.45792	2.17178	2.0265	1.86368	0.949663	1.3334	0.866791	0.790226	1.05403	2.15352	1.18708	1.1081
MAL13P1.243	0.9225	0.879878	1.21066	1.39974	1.24821	1.4814	1.505	1.78331	2.17212	2.14883	2.13	1.52558	1.92652	1.8715	2.16008	1.45256	1.60953	1.8465	1.80411	1.356	1.15281	1.23933	1.12409	1.23834	1.10985	1.005	0.842071	0.791128	0.6745	0.765072	0.776625	0.494333	0.572292	0.566688	0.606378	0.479311	0.345381	0.379549	0.345746	0.378644	0.539013	0.506403	0.602224	0.668749	0.60613	0.685887
MAL13P1.244	1.005	0.789217	0.574311	0.627446	0.420129	0.325958	0.291	0.416817	0.544005	0.316004	0.277	0.312343	0.269114	0.182	0.404068	0.411179	0.4428	0.609	0.793693	0.839	1.03019	0.966206	1.38572	1.43946	1.56805	1.469	1.91546	1.82878	1.689	2.27189	1.86465	1.56854	1.60723	1.58263	1.63796	1.19484	0.913166	0.810502	0.740396	1.14049	1.33175	1.65289	1.3939	1.09223	1.08764	1.54793
MAL13P1.246	1.055	1.20881	1.35068	0.896894	1.05337	0.977876	0.797	1.0373	0.864161	1.02971	1.259	0.952518	1.18752	0.982	0.969764	0.59691	0.883408	1.078	0.898971	0.788	0.712492	0.821229	1.03054	0.917256	1.06558	0.876	0.775504	1.41462	1.226	0.885437	0.791632	0.85295	1.14362	1.07412	1.13812	1.11244	1.00474	1.29346	1.14528	1.34122	1.97274	1.40397	1.077	1.29624	1.28905	1.11265
MAL13P1.247	1.333	1.20649	1.15365	1.01707	0.993695	0.589769	0.935	1.07993	1.26631	1.16536	1.549	0.857008	1.21742	0.967	1.39572	0.855065	0.98534	0.994	0.943385	0.908	0.753365	1.1196	1.17191	0.815694	0.897549	1.527	1.14661	1.59032	1.658	0.94562	1.16588	0.808534	1.06668	1.49429	1.24811	1.1747	0.913166	1.07589	0.822283	1.1347	1.14601	1.18139	1.26645	1.61829	1.18205	1.13652
MAL13P1.248	1.058	1.02517	0.830864	0.861474	0.916976	0.758456	0.499	0.678511	0.650724	0.636633	0.345	0.379458	0.442828	0.466	0.396492	0.362118	0.419783	0.378	0.489376	0.388	0.465395	0.498536	0.36357	0.724528	0.888532	0.865	0.904477	1.37069	1.115	1.74605	2.61876	2.07192	2.41036	2.37126	2.93909	2.07381	1.63663	1.63057	1.13277	1.09096	1.01247	1.02466	1.00351	0.365606	0.755302	0.75351
MAL13P1.249	0.767	0.789217	0.831703	0.927887	0.851217	0.792066	0.7765	0.921851	0.693671	1.12451	0.8385	0.854427	1.13697	0.719	0.734057	0.650643	0.807233	0.762	0.65675	0.6745	0.646073	0.712261	0.947719	0.980432	1.07665	1.0645	1.1903	1.52757	1.46	1.59296	1.04207	1.48176	1.60915	1.52607	1.58787	1.39215	1.01194	1.02927	0.733572	0.76185	0.75389	0.773763	0.835305	0.910576	0.915175	0.968312
MAL13P1.257	0.868	0.926371	1.14275	1.57874	1.12156	1.32793	1.299	1.52754	1.88059	1.64939	1.541	1.23389	1.21173	1.019	1.16001	0.912303	1.05001	0.991	1.27073	1.555	1.60984	1.20004	1.68523	1.40187	1.40411	1.517	1.35214	1.2174	1.263	1.01633	1.01393	0.816759	0.706949	0.538677	0.507688	0.421171	0.387245	0.404056	0.28433	0.385813	0.563293	0.56106	0.737135	0.956993	1.03854	1.05923
MAL13P1.26	0.753	0.748535	1.3314	1.25616	1.05945	1.65262	1.39	1.78331	1.35741	2.44788	1.772	1.66755	2.27394	1.571	1.97993	1.85264	2.077	2.174	1.60548	1.696	1.1463	1.6013	1.61126	1.97526	1.45575	1.418	1.33799	1.00493	0.761	1.14573	0.637808	0.498445	0.538628	0.406162	0.445823	0.376308	0.245953	0.343089	0.20358	0.411881	0.446749	0.501793	0.757803	0.843529	0.760337	1.03309
MAL13P1.260	3.137	2.29907	1.2224	1.938	1.23603	1.00958	0.843	0.794557	0.714494	0.354541	0.382	0.326541	0.340308	0.154	0.162469	0.105131	0.0964515	0.134	0.0625085	0.071	0.0510913	0.0589264	0.0414994	0.0367862	0.0327872	0.056	0.0682311	0.233977	0.266	0.721439	0.997982	1.59075	1.71111	2.81405	1.84516	2.11959	4.12364	4.00111	4.04886	5.73114	4.53062	4.62019	4.04391	2.96152	3.21129	2.28781
MAL13P1.261	0.664	1.01936	0.828349	0.862739	1.54047	1.46618	0.903	1.61161	0.680657	1.6648	1.133	1.34101	2.36222	1.022	0.963871	1.07	1.50596	1.034	0.846332	1.271	0.96609	1.21314	1.24949	1.39148	1.94182	1.105	1.1125	1.14299	1.224	0.713917	0.809453	0.668706	1.02724	0.667959	0.700157	0.553016	0.365005	0.38732	0.354844	0.465321	0.7114	0.795494	0.665948	1.59079	1.24247	0.946718
MAL13P1.262	0.398	0.541642	0.555027	0.565461	0.523639	0.610062	0.444	0.664301	0.642915	0.975759	0.83	0.9551	1.12202	0.994	1.2947	1.12724	1.02809	1.308	1.16874	1.291	1.06734	1.25803	1.41729	1.30191	1.55657	1.764	1.71743	1.66563	1.925	1.62117	1.14149	1.0117	1.19268	1.13553	1.26578	0.95496	0.470974	0.505667	0.388964	0.44186	0.523231	0.528134	0.532758	0.600556	0.633195	0.548937
MAL13P1.264	1.941	2.29907	2.13711	3.35102	2.67665	1.97224	1.696	2.14092	2.39987	2.04863	1.991	1.74757	2.07175	1.408	1.62048	1.43445	1.28346	1.368	1.15476	1.178	0.861121	0.920375	0.766836	0.69254	0.547546	0.579	0.484274	0.377411	0.365	0.507791	0.421141	0.4968	0.428017	0.607628	0.793446	0.819453	0.887001	0.992208	0.82797	1.17178	1.46893	1.48036	1.6155	1.94264	2.08841	1.61954
MAL13P1.266	0.599	0.663686	0.759599	0.919664	0.719699	0.84597	0.778	0.928364	0.90841	1.20852	1.07	1.02092	1.17613	0.97	1.13392	0.878427	0.988628	1.114	1.11446	0.942	1.03297	0.922245	1.0447	1.10439	1.08771	1.271	1.3771	1.43524	1.402	1.62192	1.21277	1.21239	1.22153	1.11075	1.0252	0.786492	0.525921	0.604888	0.421946	0.473142	0.483169	0.471501	0.584427	0.568465	0.620607	0.675091
MAL13P1.268	4.848	5.82904	6.14555	6.42627	4.79068	3.75169	3.218	3.00416	2.79811	2.43246	2.194	1.16548	1.19179	0.76	0.905786	0.508133	0.443896	0.578	0.582316	0.369	0.21737	0.221676	0.198475	0.209521	0.20328	0.205	0.125645	0.0968179	0.149	0.245244	0.116306	0.277188	0.234688	0.244559	0.338786	0.312216	0.39902	0.80333	0.729023	0.912395	1.50292	1.60021	2.32852	2.75522	2.52649	2.06619
MAL13P1.269	0.713333	0.794641	0.746744	0.898581	0.748519	0.596407	0.552667	0.709299	0.652459	0.868883	0.818667	0.801079	1.08073	0.871333	1.17713	1.15449	1.14463	1.35	1.27512	1.51867	1.12494	1.35624	1.58088	1.35309	1.51313	1.529	1.39069	1.43374	1.555	1.17281	0.916067	1.01197	1.11605	0.959204	1.0121	0.833797	0.653258	0.70132	0.499284	0.514851	0.570577	0.556231	0.690442	0.749167	0.734741	0.787606
MAL13P1.27	0.732	0.883365	1.17797	1.44211	1.20315	1.3292	1.266	1.50267	1.23507	1.94844	2.047	1.59269	1.99344	1.769	2.20722	1.41459	1.81943	2.033	1.97642	1.841	1.1398	1.4582	1.87288	1.52823	1.33034	1.465	1.26976	1.07217	1.063	1.05094	0.483046	0.492688	0.450139	0.455721	0.507688	0.340599	0.197547	0.297662	0.180834	0.355834	0.481955	0.463599	0.773877	0.764448	0.810691	0.862616
MAL13P1.270	0.601	0.672984	0.586049	0.909544	0.840257	0.995632	0.773	1.25163	1.67757	1.42896	1.111	1.27906	1.35269	0.937	1.04048	0.962532	1.00616	0.951	0.910485	1.337	1.15188	1.10557	1.22333	1.24593	1.49755	1.56	1.27725	1.33662	1.296	1.19463	1.40787	0.915461	1.06379	0.806938	0.81014	0.700426	0.600492	0.424378	0.381003	0.44577	0.393334	0.439892	0.513239	0.58451	0.581583	0.634176
MAL13P1.271	1.2975	1.38897	1.28906	1.72864	1.38277	1.32159	1.183	1.55004	1.61184	1.8282	1.563	1.20033	1.65028	1.238	1.19579	1.15644	1.33498	1.1505	1.23002	1.279	1.01718	0.966674	1.1074	0.892065	0.895909	0.9015	0.805043	0.831917	0.8015	0.840676	0.857289	0.85295	0.845935	0.881814	0.856785	0.73293	0.952414	0.870871	0.711394	0.958014	1.03918	0.99305	1.16713	1.34208	1.25632	1.29165
MAL13P1.275	1.696	1.7028	1.71539	1.67867	1.48324	1.71984	1.196	1.12612	1.44591	1.45208	1.474	1.08933	1.216	0.957	1.46306	1.02678	1.37772	1.135	1.36038	1.489	1.26335	1.04665	1.43353	1.04121	0.955746	1.317	1.00599	1.06589	0.971	0.960665	0.733479	0.60784	0.683865	0.522517	0.530274	0.518224	0.548161	0.646728	0.3992	0.606091	0.847367	0.923247	1.12637	1.19653	1.3671	1.33427
MAL13P1.278	1.7235	1.74755	0.97004	0.807711	0.798853	0.828214	0.5985	0.711075	0.355946	0.468611	0.363	0.335575	0.316102	0.1985	0.259698	0.180475	0.21318	0.287	0.173543	0.158	0.16117	0.207178	0.127656	0.179932	0.216805	0.241	0.327426	0.611835	0.7765	0.980601	1.33189	1.44475	2.29013	3.32094	3.43843	2.97201	3.5467	4.74885	3.78102	3.44103	2.42434	2.33907	1.69243	1.23893	1.70195	1.31211
MAL13P1.279	0.746	1.00192	0.866078	0.44149	0.485888	0.518743	0.392	0.297219	0.231658	0.308297	1.797	0.178113	0.343156	0.619	0.761837	0.240633	0.39019	1.016	1.05014	0.934	1.33023	1.48906	1.33069	1.8689	1.66395	1.766	1.77068	2.04842	1.366	1.37292	2.04099	1.26914	1.23692	1.05042	1.10866	0.874388	0.800656	0.778226	0.517481	0.862865	0.700474	0.799445	0.65217	0.690588	0.722572	0.610877
MAL13P1.28	0.735	0.811301	0.938181	1.38013	1.37607	1.2049	1.356	1.93843	1.69448	1.99776	1.961	1.5914	1.64031	1.472	1.39151	1.53024	1.79312	1.393	1.67292	1.321	1.67672	1.74347	1.31264	1.71856	1.41313	1.204	1.09253	0.925149	0.759	0.88318	0.815081	0.640741	0.582873	0.633484	0.6324	0.434905	0.306133	0.528381	0.325274	0.35062	0.573005	0.557109	0.732543	0.532936	0.523676	0.736462
MAL13P1.281	0.685	0.649738	0.630484	0.581906	0.499283	0.616404	0.465	0.577859	0.579144	0.66438	0.604	0.628559	0.797375	0.637	0.782041	0.800163	0.964515	0.972	0.990266	1.222	1.43985	1.12241	1.58058	1.41387	1.63936	1.41	1.52688	1.54819	1.443	1.21042	1.18651	0.916284	0.999348	0.935143	0.812104	0.730641	0.634507	0.728018	0.525442	0.646497	0.835227	0.713837	0.621169	0.755279	0.730125	0.664862
MAL13P1.283	0.867	1.13443	1.17294	1.40416	1.26282	1.56257	1.27	1.72292	1.82463	2.13496	1.81	1.9515	2.93178	1.709	1.95047	2.01734	2.10111	1.723	1.77985	2.015	1.69437	1.83981	1.57607	1.46745	1.23935	1.205	0.959395	0.804126	0.779	0.579258	0.455845	0.305976	0.326062	0.213316	0.292632	0.258196	0.260344	0.304835	0.269545	0.372778	0.409116	0.478087	0.640688	1.14954	1.15435	0.895575
MAL13P1.284	0.329	0.368456	0.380638	0.691962	0.550429	0.750846	0.834	1.29308	1.67887	1.87753	1.87	1.94892	2.83638	2.248	2.07253	2.53716	2.61077	2.352	2.41974	2.596	2.16813	1.63217	1.48766	1.25073	1.08853	1.101	0.723083	0.505605	0.513	0.30317	0.354546	0.273076	0.222184	0.217626	0.265137	0.258196	0.214555	0.19366	0.167186	0.213761	0.202737	0.243653	0.29738	0.409157	0.402828	0.469381
MAL13P1.288	1.778	1.85972	1.72712	2.13661	1.46862	1.9418	1.475	1.88041	2.12917	2.03322	1.45	1.18613	1.22169	0.786	0.593475	0.622608	0.614878	0.364	0.532145	0.522	0.608451	0.62013	0.705489	0.730926	0.823777	0.89	0.828758	0.945767	1.124	0.974206	1.58702	1.44269	1.48796	1.30575	1.48084	1.1454	1.36321	1.07589	0.821146	1.2565	1.21764	1.48694	1.43294	1.78218	1.63523	1.42519
MAL13P1.289	0.815	0.817112	1.00442	1.40669	1.25795	1.29749	1.288	1.35229	1.41207	1.77425	1.457	1.43265	1.95642	1.539	1.6853	1.38773	1.3843	1.568	1.48293	1.467	1.55225	1.11305	1.2955	1.17716	1.05821	1.259	1.02097	1.02466	0.877	0.956904	0.659381	0.48693	0.526124	0.447102	0.494922	0.291158	0.350614	0.41601	0.291154	0.414488	0.536585	0.493891	0.780767	0.853844	0.819503	0.876254
MAL13P1.293	1.618	1.47731	1.89439	2.19986	1.45523	1.82765	1.669	1.76555	1.80381	1.9916	2.115	1.68369	2.14437	1.7935	2.19081	1.63829	1.94547	2.201	1.42042	1.6795	1.11704	1.09622	0.9608	0.895264	0.74058	0.804	0.715178	0.604664	0.476	0.48259	0.25653	0.289937	0.276528	0.33775	0.367754	0.325492	0.345381	0.557071	0.554444	0.836145	1.29169	1.18402	1.49379	1.76327	1.73279	1.59737
MAL13P1.294	0.672333	0.749117	0.954949	1.25827	1.27135	1.46664	1.28233	1.70832	2.13134	2.16784	2.17333	2.03669	2.39972	1.68267	2.06327	1.63031	1.65575	1.82333	1.43084	1.60633	1.24477	1.08687	1.46751	1.13317	1.06394	1.10733	1.19155	1.01151	1.06233	0.821493	0.688145	0.574117	0.521636	0.536881	0.490012	0.444977	0.54947	0.555477	0.399958	0.555692	0.6333	0.625595	0.896351	1.43262	1.12708	1.00316
MAL13P1.295	0.362	0.29523	0.324465	0.237822	0.1851	0.21181	0.166	0.19183	0.205629	0.302131	0.321	0.49691	0.914134	0.756	1.20295	0.943842	1.3284	1.571	1.5989	1.868	1.42963	1.54799	2.15526	1.54742	1.69346	1.706	1.56266	1.79292	1.818	1.28941	0.711906	0.771521	0.884889	0.75307	0.835672	0.774589	0.494523	0.514035	0.351432	0.483569	0.424897	0.349016	0.456978	0.365606	0.467029	0.418238
MAL13P1.298	1.5585	2.18807	1.86756	2.26943	1.88327	1.42369	1.452	1.95856	1.36196	1.99853	1.5895	1.45717	1.45236	0.9705	0.87969	0.84864	0.717906	0.683	0.697463	0.474	0.443566	0.52379	0.585051	0.630164	0.725826	0.656	0.79173	0.869568	0.957	0.9475	1.07161	1.05077	1.32685	1.4178	1.64679	1.16555	1.08586	1.13327	0.877443	0.807469	1.01308	1.12871	1.07585	0.925475	0.99574	1.02059
MAL13P1.299	1.239	1.18441	1.66089	1.4497	1.54291	1.76297	1.421	1.52399	2.51309	2.08254	2.012	1.8405	1.80548	1.567	1.70466	1.3924	1.47637	1.806	1.82673	1.411	1.4417	1.17853	1.0844	1.17476	0.931975	0.911	0.723915	0.830124	0.769	1.01032	0.943581	1.21486	0.827179	0.592545	0.65695	0.497165	0.464433	0.467414	0.383277	0.469232	0.654342	0.625595	0.713024	0.518037	0.602983	0.669408
MAL13P1.300	0.457	0.383566	0.716002	0.622386	0.432306	0.634161	0.691	0.876262	1.40426	1.39813	1.878	1.13838	1.14338	1.423	1.53546	1.54426	1.50596	1.492	2.11131	2.128	1.99721	1.66116	1.97663	2.1216	1.75493	1.448	1.39541	1.3671	1.062	0.871144	1.01018	0.800309	0.747347	0.701357	0.737473	0.572244	0.405561	0.714868	0.437869	0.503121	0.700474	0.449112	0.654466	0.543251	0.572771	0.65577
MAL13P1.302	1.586	1.51102	1.6567	1.73433	1.41017	1.29622	1.122	1.30729	1.31446	1.37346	1.264	1.08546	1.20318	0.973	1.02785	0.930992	0.971091	1.037	1.09637	1.134	0.807243	0.90728	1.14665	1.03641	1.00575	1.06	0.927776	0.991487	1.081	1.03589	0.791632	0.845547	0.924324	0.756303	0.789518	0.615276	0.4435	0.54153	0.466302	0.728612	1.10959	1.02729	1.08848	1.19424	1.12666	1.21607
MAL13P1.303	0.549	0.516071	0.525683	0.440225	0.386031	0.389375	0.341	0.326822	0.348788	0.31138	0.326	0.24781	0.451371	0.376	0.45121	0.467248	0.655432	0.701	0.696641	0.881	1.16395	1.06816	1.41368	1.3291	1.5328	1.504	1.59844	1.75258	1.843	1.69489	1.98471	1.53482	1.55625	1.38655	1.30212	1.01081	0.824204	0.793766	0.576622	0.626946	0.587573	0.537354	0.566056	0.636085	0.553888	0.576214
MAL13P1.304	1.24067	1.5579	1.7738	1.28652	1.64601	1.48309	1.20867	1.65266	0.93227	1.87701	1.704	1.39909	1.749	1.27667	1.22287	1.10037	1.27689	1.36267	1.23564	0.897667	0.869172	1.04758	0.944862	0.931117	1.17323	0.964667	1.03012	1.02227	1.00633	0.832777	0.687832	0.731492	1.00897	1.05509	1.02159	0.905519	0.680732	0.943195	0.660404	0.879809	0.990214	1.22046	1.02189	1.20264	1.22988	1.16
MAL13P1.308	1.988	1.44244	0.799843	1.10562	0.728223	0.470547	0.525	0.49497	0.5401	0.351458	0.241	0.233612	0.196496	0.08	0.0850227	0.0595742	0.0504178	0.06	0.0287868	0.027	0.0269391	0.0355429	0.0685642	0.0831688	0.130329	0.19	0.305376	0.560289	0.698	1.18108	1.39192	1.84573	2.29013	3.33549	3.06478	2.54351	4.14719	4.55698	3.99655	4.18528	2.97307	2.33775	2.06559	1.57589	1.8656	1.46383
MAL13P1.31	0.5255	0.405825	0.450319	0.269448	0.319663	0.376628	0.308	0.317349	0.260289	0.264365	0.3835	0.311698	0.525413	0.653	1.09351	0.918143	1.25497	1.6145	1.65401	1.9005	1.79516	2.20132	2.70648	2.45068	2.25248	1.8235	1.58512	1.68804	1.451	0.889951	1.13445	0.668706	0.794477	0.799397	0.765951	0.582773	0.540312	0.687971	0.478243	0.509638	0.64463	0.397088	0.506924	0.666457	0.446887	0.596103
MAL13P1.310	1.385	1.74581	2.24526	2.43135	1.89606	1.98175	1.6575	2.1054	1.64893	2.25673	2.012	1.85341	1.93577	1.4025	1.58681	1.36553	1.37991	1.441	1.21933	0.9155	1.06642	1.06676	0.826379	0.871273	0.871729	0.8125	0.653604	0.698344	0.728	0.665394	0.687989	0.831565	0.938752	0.872657	1.01096	0.915132	0.635815	0.696339	0.354275	0.475749	0.684692	0.735569	1.10628	1.23378	1.18331	1.23028
MAL13P1.311	0.74	0.672984	0.515622	0.480705	0.384813	0.436302	0.297	0.281825	0.283715	0.205017	0.314	0.199926	0.227821	0.61	0.628831	0.177554	0.33758	1.024	1.149	1.627	1.21226	1.08032	1.89634	1.81212	1.6451	2.244	1.85306	1.84223	1.841	1.8604	1.47352	1.79144	1.38697	1.35854	1.25105	0.890869	0.798039	0.922873	0.531129	0.791177	0.640139	0.572782	0.726802	0.835506	0.737679	0.470518
MAL13P1.312	0.971	0.982162	1.10502	0.750153	0.941332	1.09329	0.823	1.00533	0.83683	1.0852	1.063	1.00156	1.26868	0.915	1.0994	0.481266	0.883408	0.926	1.01247	0.908	0.816532	0.89512	1.61757	1.10119	1.45985	1.215	0.971044	1.52667	1.876	0.829768	0.685644	0.687624	0.919515	0.946994	0.85433	0.716907	0.672446	0.829629	0.581171	0.79248	0.864363	0.95749	0.880659	1.28134	1.22988	0.971721
MAL13P1.315	0.954	0.863605	0.710552	0.783043	0.554691	0.353227	0.377	0.39195	0.346185	0.32217	0.4855	0.254908	0.30044	0.2875	0.285794	0.165873	0.170434	0.4315	0.333022	0.3045	0.29122	0.311001	0.566557	0.566987	0.643448	0.952	0.968132	1.50471	1.509	1.76787	1.44679	1.78897	2.26609	3.02844	2.51684	2.28669	1.85446	2.52774	1.05088	1.39466	0.968766	0.905467	1.14187	0.929486	0.905104	0.970016
MAL13P1.318	0.533	0.699718	0.592756	0.93611	0.741618	0.714065	0.875	1.14269	1.29494	1.41971	1.694	1.00415	1.16616	1.433	1.43528	1.11205	1.21441	1.451	1.72556	1.947	1.40083	1.32818	2.03347	1.65218	1.92952	1.771	1.62922	1.32318	1.373	1.1525	1.08052	0.571649	0.705988	0.605473	0.62258	0.438568	0.427801	0.454264	0.216091	0.361048	0.441893	0.471501	0.592464	0.560442	0.605501	0.633039
MAL13P1.319	0.728	0.562564	0.645576	0.399744	0.367765	0.333568	0.235	0.41208	0.352692	0.380747	0.343	0.309762	0.53538	0.346	0.561487	0.598078	0.679545	0.856	0.974639	0.986	1.06456	1.26552	1.9631	1.44906	1.67296	1.37	1.69163	1.79292	1.923	1.67684	1.30657	1.14001	1.36581	1.16354	0.977078	0.911012	0.816355	0.808111	0.624389	0.692117	0.901997	0.690131	0.667096	0.774763	0.589136	0.659179
MAL13P1.321	1.108	1.17627	1.23079	1.74066	1.08868	1.28988	1.015	1.09651	1.42248	1.29947	1.265	1.1074	0.955426	0.965	0.854436	0.633122	0.681737	0.983	0.877586	0.736	0.749649	0.544368	0.877802	0.870873	0.963123	1.101	0.895325	1.26903	1.332	1.36238	1.45383	1.3736	1.81691	1.31437	1.36889	1.02638	1.10025	0.894182	0.684667	0.782313	0.905639	0.827103	0.997429	1.17017	1.13044	0.996725
MAL13P1.322	1.698	1.66793	2.16645	2.40605	1.58309	1.24169	1.654	1.5382	1.59688	1.59852	1.46	1.21582	1.59617	1.184	1.40414	1.11322	1.19688	1.435	1.34146	1.319	1.11565	0.954982	0.997789	0.782107	0.694268	1.043	0.815444	0.750339	0.852	0.862116	0.698775	0.722992	0.635774	0.693816	0.702121	0.652816	0.815047	0.86071	0.569798	0.831583	1.09259	1.05495	1.40538	1.50712	1.99022	1.53089
MAL13P1.323	0.962	1.10537	1.3054	1.27134	1.34137	1.40593	1.1145	1.50326	1.04116	1.63629	1.4335	1.77726	1.71649	1.3565	1.75265	1.61843	1.63858	1.5275	1.48243	1.35	1.40455	1.47363	1.0862	1.18915	1.19755	0.926	1.03553	0.882567	0.8475	0.767329	0.531819	0.637451	0.731476	0.72075	0.749748	0.619854	0.539658	0.616245	0.565817	0.576764	0.716863	0.715813	0.726802	0.824045	0.848456	0.899552
MAL13P1.324	0.6995	0.60092	0.656475	0.442755	0.416475	0.282201	0.2855	0.371227	0.324711	0.28055	0.2337	0.240066	0.284777	0.3185	0.361557	0.314225	0.408275	0.5435	0.766551	0.648	0.644215	0.813278	1.40331	1.19995	1.48608	1.523	1.59511	1.92515	2.0825	1.82617	1.91811	1.56443	1.79238	1.6839	1.64581	1.14083	1.0421	0.942597	0.74722	0.74686	0.769672	0.980538	0.60739	0.62577	0.636342	0.596103
MAL13P1.325	0.801	0.786892	0.81745	0.94623	0.663681	0.71026	0.4223	0.644171	0.753538	0.895602	0.741	0.645338	0.777441	0.6258	1.02111	0.807172	0.897657	1.435	1.24935	1.982	1.41476	1.2571	2.71189	1.93367	1.68362	2.85	1.91213	2.36576	1.95	1.24202	1.04676	0.999358	0.967607	0.946994	0.882807	0.637251	0.324449	0.687373	0.589132	0.380599	0.72354	0.658521	0.667096	0.660153	0.742714	0.792152
MAL13P1.326	0.855	0.792704	0.726901	0.860209	0.604011	0.469279	0.539	0.611015	0.648121	0.733746	0.647	0.610489	0.76605	0.646	0.745843	0.774464	0.877928	0.946	0.981219	0.985	1.00046	1.29077	1.47323	1.22034	1.39263	1.565	1.54352	1.63694	1.569	1.72875	1.56826	1.31027	1.3331	1.2702	1.45236	0.95496	0.829437	0.786594	0.564111	0.608698	0.683478	0.703301	0.735987	0.710581	0.780479	0.819428
MAL13P1.327	0.393	0.421923	0.557543	0.700817	0.723352	0.938558	0.768	1.27295	1.73483	1.4937	1.443	1.77984	1.7884	1.437	1.92101	1.67976	1.53226	1.78	1.87937	1.743	2.13097	1.63778	1.56615	1.64098	1.45247	1.195	1.28557	0.960111	0.854	0.471681	0.732541	0.48364	0.423208	0.375997	0.386903	0.432158	0.299592	0.350261	0.349158	0.271112	0.418828	0.36087	0.354789	0.477923	0.484652	0.465972
MAL13P1.328	1.59	1.27274	1.06981	0.874124	0.689254	0.579623	0.507	0.471287	0.439889	0.377664	0.394	0.287821	0.355971	0.1984	0.170887	0.108635	0.146869	0.303	0.148869	0.201	0.13098	0.113176	0.20028	0.219118	0.263117	0.423	0.575803	0.922459	1.265	1.46244	1.62829	1.98638	2.2305	3.00366	2.86446	3.22105	3.183	3.64846	2.52485	3.1256	2.0298	1.84913	1.82447	1.97931	2.33892	1.51725
MAL13P1.329	1.615	1.50521	0.965848	0.99177	1.001	1.15417	0.793	0.967441	0.960468	1.15457	0.858	0.832485	0.878536	0.684	0.827498	0.67167	0.765036	0.632	0.659629	0.743	0.622385	0.824035	0.678424	0.793302	0.776236	0.69	0.69812	0.806816	0.861	0.96894	1.22684	1.47889	1.77266	2.04051	1.88345	1.75793	1.92053	2.19601	1.63774	1.82609	1.55513	1.61469	1.28138	0.914587	0.989446	1.02627
MAL13P1.33	0.815	0.641602	0.734447	0.541426	0.549212	0.705186	0.435	0.624041	0.612982	0.699834	0.473	0.625977	1.00099	0.613	0.569905	0.643635	0.802301	0.893	0.845509	1.001	0.889918	1.34408	2.01272	1.3259	1.82461	1.277	1.50275	1.83147	1.655	1.04793	0.982975	0.936847	1.1215	1.0515	0.979042	0.75994	0.798039	0.90016	0.624389	0.589146	0.655556	0.694082	0.699245	0.799977	0.523676	0.761466
MAL13P1.330	1.625	1.54414	1.27858	1.4554	1.28535	1.52199	0.996	1.36057	1.51228	1.60083	1.1555	1.06868	0.893487	0.843	0.949561	0.891276	0.938758	0.746	0.869361	0.733	0.877842	0.753884	0.65136	0.827689	0.757793	0.774	0.776336	0.785301	0.7675	1.13407	1.3258	1.49163	1.52788	1.64027	1.50195	1.37339	1.71382	1.77641	1.2448	1.83131	1.57698	1.63708	1.42318	0.983926	1.19778	1.01491
MAL13P1.331	2.466	2.71867	1.46638	1.22959	1.15566	1.28988	0.724	0.728245	0.788677	0.690585	0.84	0.593711	0.58664	0.571	0.740792	0.459072	0.578709	0.94	0.674434	0.618	0.477472	0.540627	0.46371	0.469824	0.38197	0.678	0.355301	0.348724	0.479	0.63267	1.26342	1.02074	1.46776	1.94462	1.82944	1.28183	2.55634	3.193	3.28572	3.96761	2.73755	3.61265	2.32278	1.15298	1.55089	1.13652
MAL13P1.332	0.933	0.858956	0.539098	0.4592	0.412822	0.348788	0.226	0.310244	0.317553	0.319087	0.321	0.441411	0.659258	0.473	0.73069	0.637794	1.05001	1.155	1.08238	1.426	1.25499	1.72664	2.04159	1.83931	1.86887	1.902	1.65835	1.697	1.725	1.14046	1.57295	0.98702	1.09265	0.998707	0.972168	0.596049	0.539004	0.650315	0.577759	0.65171	0.801235	0.798128	0.50635	0.806854	0.727608	0.586442
MAL13P1.333	1.222	1.50521	1.36745	1.70967	1.36755	1.34696	1.1075	1.40616	1.28778	1.78658	1.684	1.48428	1.92865	1.4665	1.62848	1.51038	1.68681	1.7165	1.41549	1.2975	0.994423	1.15608	1.29821	1.09959	1.01435	0.9505	0.904894	0.825641	0.808	0.612734	0.425362	0.494333	0.523239	0.496122	0.530274	0.466035	0.417989	0.580382	0.491891	0.596967	0.772707	0.812616	1.03911	1.25383	1.22548	1.27631
MAL13P1.334	1.26	1.35411	1.11089	1.94812	1.10451	0.919533	1.041	1.32979	1.87018	1.73109	1.482	1.11514	1.3356	1.047	1.08257	0.929824	0.988628	0.853	1.05771	1.27	0.935435	0.781009	0.954485	0.774909	0.768859	0.851	0.75387	0.827434	0.824	0.968188	1.21277	1.35304	1.15997	1.21418	1.31685	0.981513	1.39722	1.15957	0.807498	1.2591	1.13266	1.03783	1.25152	1.12088	1.22737	1.19675
MAL13P1.335	0.800333	0.724127	0.645576	1.02044	0.629178	0.65234	0.734	0.971388	1.75218	1.66994	1.39433	1.29713	1.51122	1.47733	1.35868	1.36242	1.38357	1.83567	1.41521	1.51667	1.26645	1.06598	1.18814	1.29818	1.1981	1.38033	1.09891	1.24638	1.124	1.18384	0.888867	1.07009	1.025	0.841054	0.894264	0.702868	0.580868	0.652705	0.448104	0.646497	0.657984	0.499598	0.749	0.650411	0.642846	0.716384
MAL13P1.336	0.9495	1.06527	1.10586	1.22137	1.16784	1.03875	1.025	1.54648	0.957214	1.58619	1.0945	1.26486	1.67734	1.002	0.901998	1.02561	1.03028	0.925	0.83564	0.857	0.925217	0.940017	1.09297	0.982431	1.16312	1.0035	1.07214	1.08068	1.015	0.877914	0.770528	0.681867	0.795438	0.802629	0.747293	0.642286	0.54162	0.653303	0.527148	0.68951	0.697439	0.894272	0.893289	1.14037	1.2387	1.14049
MAL13P1.337	0.551	0.497474	0.692527	0.723587	0.535816	0.592306	0.573	0.66667	0.89019	0.82007	0.792	0.703418	0.925525	0.848	1.01438	0.843383	0.87464	1.078	0.957367	1.354	1.2039	1.22904	1.45338	1.29311	1.30739	1.676	1.56099	1.56164	1.662	1.4662	1.52324	1.07503	1.01955	0.965309	0.923069	0.661056	0.561244	0.539139	0.41171	0.546133	0.604568	0.582133	0.642984	0.687659	0.629418	0.589852
MAL13P1.338	0.849	0.822924	1.30624	0.893099	1.57822	1.3533	0.886	1.1498	0.972181	1.34263	1.069	1.52042	2.12871	1.371	1.05058	1.42277	1.62652	1.304	1.14078	1.064	1.25127	1.62094	1.05372	1.25713	1.22952	1.096	1.13829	0.986108	0.842	0.85008	1.0158	0.697494	0.66559	0.695971	0.611779	0.673874	0.378087	0.612061	0.451516	0.555257	0.577861	0.790226	0.789952	0.726627	0.957975	0.838749
MAL13P1.341	1.465	1.41513	1.68269	2.25236	1.70426	1.97985	1.656	2.07639	2.94843	2.49412	2.08	2.40711	2.50746	1.7795	2.18786	1.99982	1.78435	1.9325	1.57135	1.6815	1.6247	1.12755	1.20393	0.992828	0.84263	0.821	0.671909	0.518603	0.4975	0.384417	0.430051	0.318725	0.301055	0.272032	0.322583	0.308096	0.237449	0.371181	0.413985	0.473794	0.702295	0.708569	0.865732	1.19882	1.06749	0.99161
MAL13P1.342	4.003	2.33859	1.24169	1.56609	1.1995	0.896703	0.846	0.849027	0.834227	0.456279	0.393	0.47884	0.37021	0.201	0.196983	0.0876091	0.104124	0.179	0.124194	0.141	0.152345	0.101952	0.114574	0.0855679	0.0975418	0.101	0.0757198	0.13178	0.149	0.317463	0.619987	0.912171	1.33984	2.44452	1.61733	1.56932	3.58202	3.57314	4.69145	7.2757	5.76525	5.5329	3.99569	2.4687	2.93938	2.26053
MAL13P1.343	0.716	0.548616	0.685819	0.52245	0.606446	0.648112	0.554	0.580228	0.965674	0.90331	0.766	0.943483	1.11775	0.886	0.933566	0.928656	1.09166	1.028	1.26251	0.992	1.11286	1.25055	1.15206	1.26912	1.17788	1.281	1.30388	1.30256	1.146	1.63697	2.05881	1.60967	1.65051	1.76902	2.00227	1.45304	1.2834	1.1261	0.802949	0.943677	0.72961	0.730959	0.69006	0.347268	0.527453	0.501204
MAL13P1.344	0.752	0.953104	0.819965	1.20935	1.06189	1.46111	1.063	1.22914	1.69448	1.6833	1.418	1.43265	1.84108	1.427	1.7316	1.2861	1.50815	1.545	1.56189	1.761	1.46493	1.47223	1.37489	1.39068	1.21394	1.283	0.990182	0.95025	0.857	0.980225	0.7513	0.628403	0.604033	0.528981	0.599013	0.486178	0.548161	0.559462	0.471988	0.44186	0.643416	0.595303	0.601649	0.750695	0.782997	0.752374
MAL13P1.345	0.74	0.863605	0.848471	0.939905	0.990042	1.08822	0.907	1.19006	1.49406	1.61548	1.411	1.26615	1.44809	1.269	1.3974	1.16345	1.3558	1.427	1.48787	1.631	1.62192	1.27206	1.51292	1.3251	1.35165	1.184	1.08005	1.09906	1.121	0.897474	1.1368	0.895721	1.01666	0.832795	0.797374	0.608867	0.450042	0.555875	0.31845	0.406667	0.454033	0.430673	0.600501	0.654423	0.660889	0.647814
MAL13P1.346	0.633	0.586391	0.581437	0.730545	0.53399	0.540939	0.772	0.751928	1.26566	1.17692	1.152	0.902827	1.13768	1.146	1.18863	0.973045	1.00671	1.2535	1.22673	1.2015	1.06409	0.904006	1.15386	1.21754	1.1996	1.5395	1.45906	1.54057	1.568	1.34395	1.00877	1.1252	1.1441	1.04396	0.975114	0.708209	0.526575	0.606681	0.466302	0.597619	0.569363	0.482038	0.613705	0.613163	0.572141	0.588147
MAL13P1.347	0.861	1.11118	1.09999	1.00063	1.07163	1.15798	0.886	0.959152	1.2585	1.33955	1.271	1.25325	1.71578	1.312	1.20295	1.50454	1.57939	1.569	1.63756	1.557	1.44635	1.7098	1.26483	1.56821	1.52542	1.549	1.35297	1.30077	1.106	1.45492	1.41068	1.25434	1.13785	0.870502	0.934853	0.783745	0.47359	0.647924	0.395788	0.593057	0.715042	0.662473	0.884103	0.51116	0.917692	0.691002
MAL13P1.349	0.887	1.01238	1.11089	1.86589	1.19341	1.54101	1.28	1.27295	1.46933	1.48753	2.032	1.30745	1.36978	1.289	1.51441	1.06416	0.994108	1.487	2.04715	1.63	1.36646	0.93534	1.49939	1.13797	1.21067	1.427	1.23731	1.394	1.317	1.67985	0.906063	1.10217	0.992615	0.699203	0.62258	0.613445	0.474899	0.389711	0.354844	0.391026	0.63856	0.46755	1.01614	0.971892	0.970563	0.939899
MAL13P1.35	1.215	1.40176	1.51668	1.98228	1.86318	1.51184	1.494	1.73713	1.77648	2.1997	1.634	1.57075	1.60614	1.505	1.48158	1.54893	1.56734	1.289	1.62933	1.435	1.36832	1.53302	1.19446	1.40027	1.07624	1.094	0.970212	0.761096	0.692	0.548414	0.937953	0.583987	0.705026	0.674424	0.752203	0.509068	0.487981	0.618038	0.494735	0.565685	0.886215	0.990416	0.785359	0.755279	0.980634	1.02514
MAL13P1.351	0.769	0.907774	0.676597	1.20303	0.593051	0.745773	0.853	0.74127	0.792581	0.837026	0.859	0.521433	0.753235	0.758	0.814029	0.644803	0.70037	1.096	1.23043	1.271	0.963303	1.06909	1.73125	1.43466	1.40001	1.976	1.4911	1.66563	1.584	1.71897	1.39192	1.40979	1.34849	1.05365	1.05367	0.665634	0.433034	0.817675	0.555013	0.629552	0.780598	0.873199	0.957587	0.827483	0.853491	0.889892
MAL13P1.352	0.937	0.955429	1.24085	1.68247	1.42113	1.54862	1.3	1.64122	1.86758	2.17812	1.677	1.55526	2.20987	1.623	1.99845	1.36787	1.39636	1.83	1.59808	1.629	1.31723	1.28609	1.40557	1.09159	0.952467	1.283	0.96522	0.992383	0.817	1.04342	0.660319	0.573294	0.549208	0.424477	0.465462	0.426665	0.290434	0.399274	0.309351	0.353227	0.494095	0.429356	0.943809	0.951262	0.970563	1.01036
MAL13P1.36	1.197	1.09723	1.30373	1.50031	1.40652	1.52325	1.367	1.46478	2.23979	2.07792	1.825	1.83147	2.04327	1.503	1.6491	1.58864	1.47089	1.487	1.17039	1.743	1.4417	1.40675	1.5463	1.13637	1.10985	1.303	1.1541	0.967282	0.926	0.726705	0.777563	0.625935	0.475147	0.490196	0.520454	0.549354	0.409486	0.705304	0.503833	0.593057	0.707758	0.719105	0.814064	1.00971	1.0826	0.918305
MAL13P1.39	0.5466	0.616031	0.597954	0.6067	0.486131	0.566686	0.484	0.558439	0.501057	0.804346	0.7634	0.767952	0.9503	0.7108	0.963551	0.857634	1.04869	1.0966	1.1115	1.0582	0.916485	1.17348	1.43046	1.38892	1.51821	1.4702	1.59694	1.53259	1.7254	1.53451	1.04394	1.24891	1.41678	1.33549	1.40562	1.09816	0.682127	0.755512	0.455838	0.516937	0.440922	0.441736	0.586264	0.620498	0.599206	0.661907
MAL13P1.40	1.236	0.929858	1.0631	0.939905	0.826862	0.799042	0.732	0.891656	1.12315	1.06671	0.907	0.847973	0.983904	0.866	0.979866	0.899453	0.939306	1.051	0.865249	1.422	0.993029	0.922245	1.23055	1.19395	1.57296	0.98	1.29057	1.35276	1.372	1.34583	1.22872	1.17291	1.17459	1.26266	1.10572	0.815791	1.01783	0.875055	0.630076	0.977566	0.909281	0.910077	0.928883	0.820607	0.990327	0.832182
MAL13P1.43	1.307	1.15186	1.55274	2.32889	2.49763	2.37303	1.989	2.20131	3.25882	2.47562	2.255	2.19544	2.33802	1.766	1.88902	1.6891	1.77997	1.627	1.30528	1.669	1.51045	1.1009	1.25671	1.03241	0.854925	0.942	0.816276	0.743167	0.591	0.623643	0.546827	0.474592	0.343375	0.335057	0.333876	0.2408	0.227637	0.297662	0.221778	0.349317	0.580289	0.576865	0.85425	1.21486	1.09141	1.08765
MAL13P1.44	0.936	0.943805	0.925605	0.947495	0.906016	0.792701	0.644	0.833633	0.793883	0.958803	0.84	0.712453	1.03659	0.794	0.950402	0.710218	1.14207	0.859	0.787936	1.06	0.751507	0.838065	0.978844	0.85408	0.909024	0.812	0.896157	1.17616	1.294	1.16679	1.21559	1.3514	1.41486	1.51153	1.8157	1.5153	1.76354	1.46918	0.970135	0.933249	0.876503	0.962758	1.08044	1.21257	1.23744	1.17061
MAL13P1.45	1.263	1.67956	1.82103	1.78114	1.8644	1.90755	1.577	2.0154	1.5253	2.35693	1.765	2.00442	2.03188	1.243	1.32248	1.25923	0.936018	1.208	1.10048	0.911	0.779375	1.08125	0.99418	0.902861	0.981156	0.879	1.12248	0.835503	0.934	0.783127	0.939829	0.7123	0.846416	0.868347	0.885753	0.683946	0.48144	0.529576	0.370767	0.389723	0.539013	0.736227	0.72795	0.656715	0.72509	0.775104
MAL13P1.46	0.525	0.507935	0.472025	0.392154	0.442048	0.376691	0.46	0.648908	0.488043	0.559559	0.384	0.653082	0.860026	0.666	1.0329	1.19849	1.49938	1.925	1.97971	2.41	2.28332	3.19606	2.49718	2.69419	2.15412	1.727	1.76901	1.60198	1.405	0.955399	1.21184	0.815937	0.826217	0.67981	0.6324	0.606121	0.48144	0.624015	0.551601	0.393633	0.67498	0.479404	0.378901	0.506805	0.344921	0.509159
MAL13P1.47	0.267	0.330099	0.308535	0.247943	0.197278	0.231821	0.1828	0.174068	0.134049	0.141817	0.079	0.136812	0.26769	0.153	0.408277	0.570043	0.81655	0.93	1.35133	1.996	2.20343	2.1887	2.5486	2.16719	2.85822	1.921	2.25329	2.06097	2.028	1.4993	1.74272	1.0849	1.21095	1.04396	1.10277	0.730641	0.715619	0.647924	0.422515	0.603484	0.444321	0.471501	0.346752	0.471047	0.577806	0.384142
MAL13P1.50	0.784	0.55559	0.777206	0.977855	0.7952	0.795237	0.859	0.923628	1.55653	1.39967	1.197	1.1771	1.52071	1.184	1.33174	1.18915	0.986436	1.368	1.02399	0.942	1.04598	0.988654	1.28287	0.970036	1.0123	1.209	1.16076	1.37517	1.36	1.24653	1.58983	1.16715	0.998386	0.945917	0.793446	0.748037	0.65413	0.683787	0.517481	0.630856	0.463745	0.582133	0.815212	0.877912	0.90888	0.878527
MAL13P1.53	1.567	2.07707	2.40959	2.47057	3.23316	2.63303	1.825	2.28775	2.57947	2.55732	2.453	2.3387	2.44623	1.731	2.07338	2.0045	2.07152	2.236	1.69678	1.686	1.71667	1.461	0.723532	1.0796	0.968861	0.682	0.42686	0.473332	0.32	0.264804	0.428645	0.295284	0.266429	0.253178	0.34566	0.314963	0.250314	0.333525	0.338922	0.288056	0.66284	0.837639	0.804878	0.448125	0.823279	0.956947
MAL13P1.54	0.71	0.667173	0.713487	0.800753	0.829297	0.87641	1.039	0.953231	1.26761	1.36113	1.396	1.19775	1.48796	1.292	1.58092	1.31647	1.5783	1.621	1.63509	1.558	1.24105	1.27767	1.81695	1.44186	1.36149	1.393	1.23149	1.03093	1.101	0.949381	0.961402	0.968103	0.875271	0.775695	0.858258	0.735219	0.506297	0.490127	0.322999	0.467928	0.429754	0.521549	0.562611	0.589095	0.623124	0.722824
MAL13P1.55	0.897	0.733425	1.41859	0.834909	1.02901	1.63487	1.327	1.14625	2.14218	1.57386	2.106	1.62109	1.9735	1.653	2.01697	1.69027	1.40403	1.549	2.19767	1.585	1.111	1.3048	1.03207	0.958041	1.12952	0.964	0.555001	0.608698	0.74	0.659752	0.429582	0.586455	0.488613	0.392157	0.575445	0.626264	0.646281	0.692155	0.392376	0.642587	0.997902	0.781006	0.703838	0.824045	0.749008	0.892165
MAL13P1.56	1.485	1.61098	1.74976	1.62681	1.98861	2.51508	1.663	2.0308	1.92484	2.85329	2.21	2.81625	2.27252	2.215	2.5953	2.60608	2.63488	2.472	3.09088	1.663	2.0065	2.36641	1.13131	1.41451	1.06804	0.957	0.714762	0.632902	0.539	0.628909	0.551516	0.485285	0.520353	0.625943	0.672662	0.652816	0.514147	0.681396	0.560699	0.826369	1.31111	1.30519	1.16311	0.465316	0.589136	0.670544
MAL13P1.59	1.265	0.882202	0.541613	0.655277	0.446919	0.3323	0.397	0.422737	0.596063	0.647423	0.969	0.757626	1.29431	1.438	2.33013	1.83161	1.89067	3.444	2.23632	2.332	1.40455	1.61066	1.7944	1.40667	1.14837	1.68	1.03511	0.762889	0.814	0.580762	0.698775	0.698317	0.713682	0.748761	0.855312	0.641829	0.87261	0.882228	0.875737	1.34774	1.34389	1.37236	0.932327	0.82863	0.722572	0.62622
MAL13P1.60	3.407	2.98194	1.55315	2.13597	1.28657	0.773676	0.8415	0.8958	0.703432	0.544915	0.491	0.469806	0.413638	0.2615	0.240757	0.185731	0.215372	0.209	0.129541	0.148	0.11333	0.118321	0.114574	0.143546	0.119263	0.1075	0.109835	0.093232	0.137	0.337399	0.579655	0.882149	1.30088	2.19026	1.98951	1.93739	3.03124	4.06327	4.30931	7.15708	5.60318	5.51709	3.7362	2.07387	2.9589	2.26905
MAL13P1.61	1.545	1.80044	2.40959	3.67739	3.28066	3.73394	3.777	4.72471	5.27086	5.76823	4.641	4.55866	4.79137	3.146	2.90761	2.01734	1.2999	0.985	0.500068	0.479	0.31305	0.225417	0.185845	0.139148	0.109837	0.107	0.0906974	0.0573736	0.056	0.0579258	0.0487736	0.0509961	0.0432826	0.0527903	0.0648112	0.075994	0.102044	0.163774	0.217228	0.363654	0.670124	0.736227	1.40194	1.91857	2.03176	1.99118
MAL13P1.63	1.191	1.48893	1.5586	1.38139	1.85709	1.00578	1.056	1.33216	1.15048	1.3935	1.253	1.35134	1.34415	1.087	1.34016	1.18564	1.08837	1.309	1.09883	1.043	0.824893	1.0111	0.84352	0.781307	0.800826	0.819	0.844567	0.764682	0.746	0.810961	0.791632	0.820872	0.885851	1.23142	1.16758	0.963201	1.36713	1.2301	1.09524	0.973655	1.03554	1.08129	0.811767	0.527206	0.683549	0.825111
MAL13P1.69	0.771	0.696231	0.540774	0.440225	0.49563	0.555525	0.476	0.631146	0.715796	0.779991	0.575	0.691802	0.615118	0.814	1.00007	0.891276	0.994108	1.1637	1.23783	1.385	1.91825	2.01846	1.26573	2.71178	1.91231	1.711	1.3147	1.16002	1.097	1.03589	1.46696	1.02815	1.15228	0.800474	0.761041	0.958623	0.621293	0.676614	0.598231	0.504424	0.621564	0.650619	0.616576	0.300278	0.537523	0.481315
MAL13P1.70	1.993	1.96316	2.00967	2.43515	1.52342	1.86316	1.855	2.11605	2.02635	2.11646	1.897	1.5785	1.8126	1.241	1.29891	1.01042	1.27798	1.226	1.15558	0.965	0.846258	0.718341	0.777662	0.77411	0.642628	0.551	0.449326	0.435681	0.405	0.519828	0.438024	0.540394	0.577102	0.691661	0.67168	0.588724	0.857696	1.11175	1.01904	1.13267	1.3184	1.30256	1.66143	1.73519	1.36961	1.91162
MAL13P1.73	0.467	0.549778	0.651445	0.833644	0.690472	0.913191	0.798	0.772058	1.18952	1.28097	1.526	1.13192	1.71578	1.321	1.82925	1.56995	2.1307	1.96	1.95504	2.278	1.9424	1.82485	2.30682	1.64658	1.37542	1.611	1.47113	1.16988	0.994	1.154	0.827275	0.709832	0.591529	0.524671	0.4743	0.405606	0.362388	0.431551	0.303665	0.34671	0.580289	0.526817	0.586723	0.480215	0.552629	0.60349
MAL13P1.74	0.434	0.378917	0.233916	0.259328	0.302005	0.265079	0.148	0.278272	0.166585	0.218891	0.26	0.276204	0.425741	0.389	0.678498	0.592237	0.936018	1.374	1.26086	2.039	1.55689	2.09516	2.44215	2.15679	2.17379	2.372	1.90797	2.03855	1.709	1.45792	1.37973	1.08161	0.928172	0.799397	0.735509	0.516393	0.523304	0.573807	0.419671	0.344103	0.335062	0.389845	0.497165	0.528352	0.415416	0.371641
MAL13P1.75	0.403	0.263847	0.404114	0.245413	0.216762	0.209273	0.24	0.252221	0.344883	0.29134	0.298	0.480131	0.934068	0.533	0.978182	0.84572	1.12783	1.517	1.46401	1.479	1.48443	1.30667	2.27435	1.56341	1.96395	1.66	1.66168	1.9507	2.078	1.40602	0.974533	1.1836	0.889698	0.614092	0.597049	0.590556	0.570402	0.626406	0.337784	0.355834	0.683478	0.447795	0.39268	0.614309	0.409122	0.651224
MAL13P1.76	0.852	0.869417	1.11592	1.58506	1.13983	1.50042	1.491	1.52043	1.81161	1.89911	1.738	1.32681	1.67591	1.537	1.59523	1.41343	1.4402	1.263	1.08074	1.568	0.951227	1.13831	1.22513	1.37788	1.15575	1.358	1.06257	0.854328	0.915	0.778613	0.766308	0.658836	0.522277	0.498815	0.472336	0.338768	0.185773	0.34548	0.258172	0.447073	0.537799	0.538671	0.730246	0.924902	0.827056	0.973994
MAL13P1.78	0.839	0.60557	0.598625	0.413659	0.428653	0.509865	0.277	0.339848	0.389133	0.642799	0.749	0.508526	0.814462	1.057	1.46138	1.52089	1.79312	2.134	2.74462	3.17	2.33812	2.57686	2.90676	2.53905	1.92707	1.756	1.43951	1.20753	0.905	0.713917	1.08803	0.771521	0.886813	0.503124	0.857276	0.932071	0.380181	0.516426	0.311626	0.539616	0.606997	0.517598	0.558018	0.638377	0.489688	0.501544
MAL13P1.79	1.43	1.57146	1.24923	1.77734	1.36998	1.52833	1.063	1.26584	1.58646	1.57231	1.382	1.18742	1.65028	1.111	1.26356	1.16462	1.33607	1.306	1.20822	1.427	1.37668	1.10838	1.27836	1.08359	1.05411	1.045	0.903645	0.841778	0.827	0.930574	0.802888	0.806889	0.786782	0.77354	0.932889	0.865233	0.881768	1.18706	1.0361	1.18872	1.17515	1.00754	1.27334	1.50597	1.37339	1.15925
MAL13P1.81	1.124	1.06236	0.737801	1.00442	0.848782	0.920801	0.77	0.884551	1.49146	1.34417	1.247	1.48169	1.62892	1.312	1.54809	1.49403	1.48294	1.846	1.89253	1.552	1.94611	1.42265	0.863367	1.29391	0.978697	0.931	0.831254	0.764682	0.557	0.95239	1.31126	1.38841	1.12054	1.27559	1.1833	0.975103	1.41554	1.53613	1.02814	1.2969	1.20549	1.051	1.15393	0.425203	0.828315	0.695548
MAL13P1.83	1.086	1.1104	1.22436	1.4223	1.17839	1.16897	0.951333	1.27926	1.14874	1.27583	1.121	0.987797	1.29811	0.926333	1.29358	0.943063	1.26593	1.20733	1.26552	1.29367	1.26675	1.06847	1.3379	1.21661	1.13908	1.08967	1.10251	1.08651	0.949667	1.10661	0.721286	0.695027	0.705988	0.676219	0.626508	0.521886	0.521996	0.59134	0.502317	0.535706	1.04849	0.960124	1.01997	1.09605	1.02176	0.958083
MAL13P1.87	0.627	0.718315	1.12263	1.10056	1.152	1.09202	0.953	1.38899	1.47324	1.56306	1.238	1.2868	1.57054	1.081	1.15159	0.996407	1.00836	0.962	0.910485	1.107	1.01718	0.901668	1.27114	1.10918	1.26558	1.185	1.24563	1.32228	1.496	1.14422	1.07114	1.02486	1.05032	0.7897	0.773807	0.579568	0.442192	0.482954	0.39465	0.517458	0.514733	0.438575	0.656762	0.929486	0.745232	0.810336
MAL13P1.89	0.406	0.404488	0.344587	0.409864	0.347063	0.264515	0.21	0.299587	0.201724	0.302131	0.717	0.410435	0.585216	0.482	1.03122	0.636626	0.999588	1.285	1.91556	2.278	1.66372	1.97544	2.85083	2.30394	1.9492	2.199	1.76069	1.66473	1.868	1.13745	1.46321	1.02403	1.07341	0.838181	0.904411	0.489841	0.621424	0.365802	0.30139	0.320642	0.364198	0.35165	0.407606	0.725481	0.453181	0.555756
MAL13P1.90	0.362	0.456793	0.468671	0.475645	0.395773	0.429961	0.372	0.567202	0.400846	0.746078	0.664	0.691802	0.777441	0.578	0.734899	0.734748	0.919578	0.896	0.94174	1.244	1.12865	1.51432	1.72493	1.56901	1.96231	1.92	1.94042	1.61184	2.033	1.22321	1.3	1.11698	1.19749	0.902823	1.09884	0.796563	0.362388	0.437528	0.310489	0.367565	0.427326	0.57028	0.477645	0.507722	0.446887	0.452333
MAL13P1.92	0.911	1.47266	1.40518	1.28905	1.80594	1.72365	1.45	2.23092	1.64893	2.62977	1.869	2.46648	2.59147	1.662	1.57334	1.96244	2.09782	1.42	1.40973	1.415	1.43241	1.85852	1.05463	1.42027	1.24427	0.954	1.02513	0.718066	0.687	0.550671	0.795384	0.413726	0.536705	0.524671	0.50867	0.342431	0.328373	0.366997	0.342334	0.44577	0.500165	0.746763	0.562611	0.583364	0.784255	0.809199
MAL13P1.94	1.639	1.25647	0.741154	0.985445	0.678295	0.82314	0.603	0.777979	0.8095	0.656672	0.424	0.447864	0.623661	0.226	0.300526	0.383144	0.386902	0.365	0.149691	0.228	0.247096	0.277796	0.147052	0.257503	0.278691	0.345	0.388584	0.662485	0.932	0.938849	1.64048	1.82434	2.26705	2.6546	2.17314	2.20749	2.86248	2.45661	2.27464	2.08417	1.17879	1.52777	1.17804	1.59881	1.25254	1.31154
MAL13P1.95	0.428	0.384729	0.530714	0.382034	0.192407	0.208005	0.143	0.181173	0.134049	0.214266	0.505	0.200055	0.36309	0.34	0.612837	0.391321	0.587477	0.783	0.775599	1.062	0.909425	0.987719	1.73125	1.48024	1.65657	1.884	1.67832	1.91753	2.275	1.67834	1.6583	1.21815	1.36965	1.22495	1.12634	0.882629	0.644973	0.701718	0.448104	0.496603	0.534157	0.491257	0.474201	0.657861	0.604242	0.426194
MAL13P1.96	0.489	0.613706	0.799005	0.53004	0.389684	0.238444	0.216	0.219066	0.193916	0.209642	0.269	0.162625	0.247756	0.185	0.356927	0.269836	0.327716	0.565	0.558464	0.582	0.573152	0.781009	1.17281	1.00202	1.20001	1.745	1.71576	2.07262	2.396	2.2749	1.64798	1.66066	1.55625	1.66667	1.5486	1.38437	0.863452	0.940804	0.595956	0.587843	0.539013	0.67696	0.633799	0.624624	0.674737	0.565985
MAL6P1.100	1.572	1.59471	1.7288	1.40796	1.77063	1.5112	1.354	1.90765	1.06328	1.86982	1.2885	1.7237	1.90943	0.9785	0.937354	0.897701	0.905877	0.767	0.578203	0.52	0.477936	0.502278	0.437999	0.568587	0.499594	0.421	0.505076	0.333036	0.4085	0.528479	0.470383	0.451973	0.639621	0.919522	0.965785	0.963201	1.07016	1.38132	1.13391	1.19068	1.30261	1.78262	1.49494	2.48302	2.43963	1.78603
MAL6P1.101	1.544	1.18208	0.752892	1.0993	0.698997	0.64938	0.423	0.408528	0.57524	0.279009	0.193	0.157462	0.132421	0.1026	0.159102	0.0992903	0.0471297	0.196	0.0857847	0.143	0.133766	0.142172	0.159682	0.295889	0.400003	0.483	0.604927	0.840881	0.844	1.95819	2.52216	3.02522	2.88936	3.93988	3.67656	3.04617	3.90778	2.72797	1.5024	1.81045	1.77	1.33153	1.59483	0.668176	0.878668	1.01605
MAL6P1.103	0.618	0.554428	0.545805	0.382034	0.361676	0.37796	0.296	0.434579	0.351391	0.443947	0.528	0.423341	0.522565	0.312	0.654086	0.515141	0.842855	0.963	1.06347	1.026	1.19275	1.49093	2.32577	2.00805	1.9992	1.833	1.62007	2.06814	2.087	0.996023	1.40693	0.8365	1.10804	0.904977	0.817996	0.590556	0.523304	0.496104	0.431045	0.523975	0.562079	0.500476	0.465015	0.772471	0.507311	0.667135
MAL6P1.104	0.941	1.0211	1.32301	1.17077	1.56787	1.3831	1.185	1.82239	1.2097	1.85749	1.306	1.77339	1.9315	1.175	1.03837	1.25807	1.24565	0.9925	1.35915	1.232	1.5332	1.52554	1.65591	1.30791	1.40042	1.0385	1.14037	0.921115	0.9075	0.475443	0.732541	0.44457	0.560269	0.449795	0.524382	0.443146	0.554703	0.528978	0.46687	0.537009	0.784239	0.857395	0.725654	1.17131	0.995111	1.01775
MAL6P1.107	0.73	0.749698	0.627969	0.861474	0.899928	0.966461	0.897	1.21374	1.12055	1.26402	1.289	1.01834	1.42388	0.934	1.26103	0.843383	1.03466	1.019	1.10541	1.58	1.02276	0.987719	1.4209	1.30191	1.00739	1.165	0.891996	0.867775	0.906	0.844062	0.969843	0.83321	0.98492	1.04503	1.12438	0.980597	1.41946	1.22532	0.835931	0.709061	0.645844	0.680911	0.873769	0.910003	0.820762	0.792152
MAL6P1.108	1.191	0.967052	0.583533	0.767863	0.546776	0.423619	0.432	0.401423	0.370912	0.294423	0.313	0.321378	0.402959	0.451	0.421746	0.431037	0.532675	0.734	0.791226	0.77	0.710634	0.693087	0.857052	0.90606	0.76722	1.018	0.897821	1.05334	1.198	1.31048	1.44726	1.4575	1.62166	1.85305	1.85105	1.55559	2.23059	2.3813	1.89819	2.07114	1.72144	1.23539	1.31467	1.04753	1.29283	0.846704
MAL6P1.110	1.621	1.6842	1.73635	1.97089	1.87779	1.67292	1.598	1.91357	2.30226	2.16424	1.643	1.7308	2.35938	1.497	1.70045	1.56995	1.62214	1.618	1.42454	1.467	1.63585	1.36373	1.24949	1.04521	0.879516	0.974	0.807956	0.618559	0.552	0.583772	0.504619	0.340522	0.332795	0.324284	0.393777	0.434905	0.626657	0.543921	0.598231	0.723399	1.08652	1.04705	1.17	1.40168	1.52823	1.2854
MAL6P1.111	1.409	1.28669	1.38841	1.30676	1.32493	1.13388	1.251	1.81292	1.45502	2.06096	1.459	1.77597	2.10023	1.344	1.43697	1.23938	1.4117	1.327	1.33735	1.144	1.10915	0.964336	1.0447	0.888467	1.01722	0.757	0.694792	0.805919	0.73	0.598817	0.475542	0.455674	0.529972	0.479423	0.511616	0.492587	0.472282	0.63836	0.591407	0.733826	0.96998	1.0431	1.02074	1.72946	1.28276	1.41042
MAL6P1.115	0.4585	0.488175	0.434716	0.45414	0.33245	0.252396	0.2205	0.330967	0.281763	0.289799	0.3865	0.265879	0.405807	0.4265	0.575797	0.506965	0.6505	1.027	1.19342	1.499	1.30701	1.58634	1.92476	1.58581	1.52829	2.0415	1.78441	1.82027	2.1045	1.48425	1.47868	1.08243	1.10563	0.945378	1.02912	0.584146	0.566477	0.55468	0.479381	0.439905	0.46678	0.4366	0.510369	0.538093	0.510458	0.53814
MAL6P1.116	0.993	1.10072	1.37918	1.80138	1.27865	1.39515	1.355	1.52517	1.73743	1.50141	1.24	1.15903	1.32706	1.04	1.27029	1.01276	1.04562	1.133	1.00836	1.039	1.05062	0.995202	0.999593	1.10998	1.05247	1.291	1.05176	1.1905	1.188	1.1051	1.03738	1.14823	1.008	0.861883	0.889681	0.628095	0.690762	0.515231	0.510657	0.619125	0.710186	0.732276	0.856547	1.18277	0.978116	0.90694
MAL6P1.119	1.599	1.61214	1.98535	2.09613	2.1871	2.06863	1.81	2.20013	2.04197	2.31993	2.621	1.96957	2.38216	1.904	2.07674	1.8176	2.16139	2.101	1.82262	2.313	1.68323	1.26271	1.28648	1.01322	0.875417	0.878	0.729739	0.500226	0.416	0.403976	0.296393	0.269786	0.255848	0.268261	0.34566	0.281086	0.283893	0.487736	0.417397	0.65171	1.17515	1.1129	1.29745	1.60225	1.44892	1.64681
MAL6P1.121	1.936	1.90737	1.08323	1.26501	1.0558	0.856117	0.704	0.939021	1.33008	1.01738	0.825	0.918961	1.05083	0.677	0.841809	0.760447	0.551308	0.753	0.94174	0.481	0.587086	0.607036	0.682033	0.734125	0.675415	0.639	0.621568	0.955628	0.771	0.600924	0.700651	0.769053	0.930095	0.985779	0.808176	0.73705	1.20491	1.33051	1.55813	2.21842	3.39554	3.03974	2.99332	2.13747	2.25206	2.33895
MAL6P1.122	0.882	0.731101	0.889553	0.896894	0.744054	0.89163	0.751	0.970993	0.950056	0.929515	0.798	0.76408	0.902742	0.846	0.691125	0.741757	0.834086	0.87	0.81919	0.77	0.848116	0.93534	0.857954	1.0564	1.10575	1.1	1.09919	1.36621	1.225	1.33004	2.34863	1.31438	1.35523	1.532	1.27364	1.17196	0.804581	0.891792	0.609604	0.727309	0.609425	0.642717	0.738284	0.577634	0.626901	0.721688
MAL6P1.125	0.646667	0.809364	0.626292	1.11195	1.00668	0.769871	0.570333	1.21295	0.879778	1.06362	0.570667	0.808823	0.812563	0.507	0.652402	0.579777	0.730693	0.83	0.851541	0.861333	0.768847	0.896367	1.3791	1.34776	1.48881	1.761	1.66861	1.86255	1.81433	1.79695	1.07802	1.16715	1.16863	1.04072	1.07822	0.809687	0.569094	0.68538	0.470093	0.558733	0.532943	0.547451	0.631885	0.657097	0.59501	0.655391
MAL6P1.127	2.949	2.27118	1.56615	2.09613	1.08259	0.892898	1.073	1.16874	1.34309	1.25631	1.497	1.12676	1.15619	1.037	1.14654	0.934497	0.772708	1.147	1.0133	0.838	0.646537	0.490118	0.53047	0.37186	0.345085	0.308	0.245465	0.213358	0.234	0.36561	0.536509	0.671996	0.976264	1.13338	1.20392	0.829525	1.73737	2.09559	2.33492	3.60396	3.6869	3.70879	3.07484	2.47672	2.0305	1.94231
MAL6P1.131	0.952	1.04865	1.21536	1.04465	1.04996	1.04408	0.7594	1.11877	0.667642	1.2597	0.8744	0.997176	1.35725	0.8562	0.864875	0.860905	1.00551	1.0174	0.797312	0.7778	0.660657	1.04122	1.02792	1.1135	1.28755	1.211	1.35846	1.38647	1.376	1.37638	0.72016	0.937505	1.16055	1.06981	1.05269	0.928408	0.647328	0.861428	0.7131	0.767194	0.806577	0.7465	0.840702	0.952408	0.926252	0.902848
MAL6P1.133	1.654	1.91783	1.30289	2.1189	1.426	1.23281	1.255	1.29071	1.58256	1.65401	1.447	1.54623	1.6873	1.211	1.64405	1.26858	1.75257	1.622	1.48211	2.111	1.46307	1.39366	1.57968	1.0644	0.895089	0.912	0.668997	0.587183	0.568	0.449865	0.423017	0.47377	0.428017	0.653954	0.5234	0.470613	0.828129	0.827238	0.841618	1.26693	1.68259	1.6766	1.75672	1.42804	1.67929	1.41155
MAL6P1.134	0.264	0.241763	0.274998	0.212522	0.168051	0.177565	0.129	0.143281	0.1796	0.272843	0.387	0.485294	0.842939	0.797	1.20884	1.02795	1.59693	2.025	2.12858	2.201	1.94797	2.1756	2.55672	2.00245	1.81969	1.898	1.63338	1.29359	1.247	1.08178	0.819771	0.523943	0.648277	0.572075	0.63731	0.585062	0.480132	0.496104	0.232013	0.367565	0.37998	0.342431	0.299677	0.380505	0.342404	0.250034
MAL6P1.135	2.162	1.69234	1.21905	1.08791	0.913323	0.953777	0.83	1.06099	0.952659	0.866314	0.64	0.725359	0.818733	0.533	0.575797	0.417019	0.474585	0.697	0.286223	0.402	0.312121	0.388166	0.323875	0.352668	0.352462	0.394	0.320353	0.336173	0.434	0.429554	0.968905	1.36949	1.61781	1.87675	1.4337	1.72406	2.30516	2.97901	3.10716	4.48898	2.36486	3.33344	2.76713	1.90367	2.48872	1.5468
MAL6P1.136	0.637	0.526532	0.739478	0.705877	0.706303	0.764798	0.739	0.837186	1.20254	1.24244	1.094	1.02867	1.33276	1.149	1.39488	1.14943	1.17934	1.253	1.20411	1.501	1.17882	1.25616	1.63652	1.21314	1.41067	1.462	1.39208	1.32049	1.372	1.26609	1.2259	0.968103	1.15613	0.980392	0.913249	0.718738	0.355847	0.475782	0.420809	0.45359	0.372696	0.457014	0.525869	0.534082	0.553888	0.618265
MAL6P1.137	0.853	0.949617	0.972556	1.03225	0.728832	0.743236	0.631	0.751513	0.675451	0.823152	0.61	0.673087	0.914845	0.6335	0.844334	0.86733	1.16125	1.1575	1.11734	1.512	1.44681	1.30153	1.66223	1.49584	1.72092	1.5835	1.53936	1.46392	1.389	1.04718	1.0008	0.88544	0.854591	0.797781	0.712432	0.632673	0.540312	0.479966	0.384983	0.525279	0.542655	0.598596	0.628632	0.921464	0.740826	0.69157
MAL6P1.139	0.565	0.573025	0.674082	0.702082	0.670988	0.750846	0.395	0.678511	0.612982	0.792323	0.804	0.536921	0.915557	0.939	1.20547	0.967204	1.23962	1.101	0.923645	1.533	1.71667	1.678	2.06865	1.74495	1.79346	1.494	1.65752	1.81982	1.589	0.880923	0.793508	0.853773	0.630003	0.785391	0.729617	0.621686	0.460508	0.488931	0.410573	0.480962	0.815803	0.736227	0.500609	0.868743	0.636972	0.665998
MAL6P1.140	0.309	0.306853	0.273322	0.274508	0.198496	0.164882	0.103	0.219066	0.232959	0.275926	0.338	0.307181	0.595184	0.716	1.13476	0.911134	1.3558	1.305	1.95339	3.156	1.65629	1.92399	2.32667	2.37911	2.46559	2.058	2.05359	1.84492	1.786	1.45868	1.03269	0.860353	0.833912	0.635639	0.739437	0.455048	0.30875	0.564243	0.41171	0.417095	0.293786	0.350333	0.38005	0.436664	0.416675	0.431876
MAL6P1.141	0.421	0.588135	0.766307	0.678047	0.650286	1.11993	0.756	1.35939	1.46413	1.68484	1.539	1.31133	1.46091	1.464	1.39993	1.35152	1.28237	1.406	1.98711	2.242	2.08917	1.94551	2.16609	1.8689	2.16723	1.846	1.19654	1.00493	1.078	0.808704	0.872296	0.687624	0.616537	0.545141	0.482156	0.455964	0.345381	0.358629	0.387826	0.307607	0.461317	0.362187	0.512091	0.668176	0.718796	0.438695
MAL6P1.145	3.1	2.50945	1.41356	2.02782	1.16418	0.745773	0.782	0.732981	1.11144	0.539519	0.403	0.415597	0.320374	0.171	0.20961	0.156528	0.144677	0.246	0.166141	0.198	0.214584	0.193615	0.260724	0.250306	0.245084	0.278	0.312032	0.357688	0.366	0.567974	0.868544	1.10135	1.20422	1.75285	1.48673	1.32486	2.85332	2.75666	3.01618	4.80702	4.38737	3.78386	3.96583	2.2773	2.72035	2.31167
MAL6P1.146	1.0135	1.01703	1.54519	1.09613	1.36268	1.46808	1.0965	1.52221	1.08736	1.78118	1.279	1.51719	1.78128	1.2155	1.09309	1.15878	1.18537	1.028	0.871418	0.8035	0.804456	0.969948	1.13221	1.01722	1.16394	1.0655	1.20153	1.05827	1.122	1.1051	0.766308	0.809357	0.971454	0.978237	1.08804	0.985175	0.652822	0.732201	0.516912	0.679082	0.648879	0.757958	0.836453	1.02117	0.971822	1.0831
MAL6P1.147	1.54167	1.30839	0.770108	0.848149	0.766867	0.680919	0.565267	0.602095	0.426528	0.421647	0.297	0.27457	0.267595	0.188933	0.202203	0.122653	0.145737	0.214	0.139468	0.120933	0.0965471	0.0956541	0.0802321	0.130991	0.176504	0.242267	0.379542	0.722728	0.892	1.37868	1.38173	1.86333	2.39869	3.17381	3.88468	3.80269	4.0693	4.80189	3.28898	2.83025	1.67355	1.44778	1.48269	1.18973	1.37515	1.21456
MAL6P1.148	1.345	1.24891	0.855597	0.874124	0.521203	0.748944	0.581	0.587332	0.687815	0.653589	0.5925	0.569188	0.896335	0.84	1.059	1.05014	1.14755	1.5265	1.46196	1.973	1.99303	1.81596	1.95273	1.42467	1.46395	1.284	0.900733	1.00099	0.838	0.705265	0.748487	0.729161	0.719934	0.63941	0.756622	0.785576	0.523304	0.749535	0.574916	0.783356	1.09199	1.01281	1.30032	1.51629	1.55152	1.25187
MAL6P1.149	1.706	1.49126	1.94511	1.92914	1.28231	1.59808	1.281	1.4186	1.98861	1.65555	1.593	1.21969	1.30143	0.938	1.27197	0.913471	1.08398	1.015	1.31515	1.478	1.51973	0.936275	1.47233	1.15557	1.1287	1.212	0.927776	0.885704	0.872	0.853089	0.800074	0.731218	0.662705	0.448179	0.50376	0.393704	0.490598	0.524794	0.326411	0.480962	0.949342	0.896906	1.21019	1.50941	1.38724	1.42519
MAL6P1.150	1.454	1.17395	1.47728	1.73054	1.18976	0.994364	1.151	1.31558	1.57996	1.55536	1.238	1.19129	1.44809	1.087	1.21481	1.04196	1.21332	1.217	1.29705	1.249	1.23641	1.04197	1.16108	0.978033	0.937713	1.135	0.916959	0.897358	0.932	0.865878	0.981099	0.718057	0.684827	0.699203	0.693284	0.631757	0.832054	0.836802	0.825695	0.903271	1.09866	0.915345	1.06552	1.17131	1.104	1.14106
MAL6P1.151	1.655	1.29134	1.48902	1.69638	1.40286	1.20617	1.23	1.43281	1.68147	1.61702	1.279	1.30745	1.58478	1.046	1.03037	1.05131	1.05329	1.092	0.917065	0.893	0.973522	0.785686	1.21341	0.876471	0.836892	0.976	1.00682	1.03631	0.889	1.04342	0.82915	0.819227	0.792553	0.823098	0.720779	0.710498	0.599184	0.728018	0.647136	0.789873	1.0756	1.03651	1.37093	1.41199	1.63397	1.47633
MAL6P1.153	0.466	0.477714	0.556704	0.759008	0.672206	0.936021	1.004	1.32979	2.09012	1.84516	1.753	1.90375	2.20987	1.501	1.93364	1.68326	1.52788	1.775	1.48046	1.77	1.87923	1.32257	2.01362	1.44586	1.38116	1.578	1.21152	1.05962	1.015	0.703385	0.856351	0.544506	0.449177	0.341521	0.354498	0.280171	0.27081	0.240282	0.238837	0.29327	0.263437	0.310822	0.383494	0.62004	0.524935	0.612582
MAL6P1.154	0.548	0.574187	0.574311	0.767863	0.622277	0.901776	0.704	0.727061	1.0802	0.977301	0.904	1.07513	1.20318	1.115	1.34858	1.23003	1.301	1.247	1.70911	1.795	1.76219	1.67706	1.95137	1.62339	1.56313	1.655	1.40789	1.48185	1.458	1.05621	1.33189	0.968103	0.882965	0.581771	0.611779	0.514562	0.410794	0.492518	0.390101	0.621732	0.546297	0.501793	0.537351	0.656715	0.648301	0.518251
MAL6P1.155	1.261	1.13443	1.24336	1.3776	1.13983	0.966461	0.908	1.13559	1.16219	1.31643	1.009	1.18484	1.24305	0.892	1.03458	0.856233	0.956843	0.887	0.865249	1.055	0.933578	0.821229	1.06906	1.00602	0.940991	0.95	1.16076	1.19498	1.241	1.30371	1.2184	1.34811	1.28886	1.27882	1.37773	1.0511	0.927557	0.944391	0.613016	0.783356	0.808519	0.890321	0.935772	0.877912	1.08638	0.904667
MAL6P1.157	2.427	2.12705	1.899	2.0683	1.83639	2.10668	1.453	1.64832	1.32748	1.75883	1.326	1.12934	1.20176	0.952	0.859487	0.865578	0.98534	0.732	0.93516	0.841	0.752436	0.79691	0.899454	0.788504	0.672137	0.689	0.519222	0.541463	0.52	0.549167	0.508371	0.678577	0.810828	0.841413	0.875933	0.989753	1.09371	1.28509	1.17372	1.86389	2.56638	2.5195	2.46286	2.14321	1.95875	1.99118
MAL6P1.159	0.771	0.788054	0.874462	0.853884	0.89871	0.650649	0.57	0.794557	0.894094	0.80003	0.752	0.886694	0.746115	0.725	0.805611	0.723067	0.978106	0.992	1.14053	1.091	1.22526	1.43668	1.47233	1.56821	1.84592	1.567	1.61508	1.60377	1.527	1.05621	1.47446	0.878448	1.16094	0.847878	0.856294	0.777336	0.610958	0.633578	0.432182	0.608698	0.653371	0.558426	0.416791	0.771325	0.735161	0.909213
MAL6P1.160	0.5845	0.517814	0.698396	0.934212	0.786067	0.913825	0.9145	1.10539	1.49797	1.40583	1.1855	1.38167	1.80264	1.3725	1.49632	1.55185	1.43472	1.6895	1.50761	1.9585	1.68694	1.66958	2.1494	1.5934	1.46518	1.785	1.55766	1.35007	1.2025	1.10247	1.1701	0.910938	0.648758	0.506895	0.50376	0.440857	0.417989	0.37417	0.303096	0.374734	0.365412	0.376016	0.49659	0.630928	0.700543	0.671113
MAL6P1.161	1.102	1.43314	1.36577	2.43642	1.63302	1.31779	1.499	1.59385	2.21767	1.6833	1.594	1.47266	1.55346	1.283	1.341	1.33867	1.2462	1.512	1.13091	1.453	1.45285	1.34128	1.47052	1.14917	1.06476	1.43	1.21901	1.22188	1.198	1.04718	1.01674	0.750958	0.572292	0.565611	0.574463	0.413847	0.378087	0.407642	0.393513	0.543527	0.548725	0.578182	0.98744	1.22976	1.36458	1.18198
MAL6P1.164	0.85	0.978675	0.905483	0.694492	0.512679	0.555525	0.461	0.399055	0.295428	0.308297	0.323	0.202636	0.254875	0.406	0.356085	0.143679	0.323332	0.412	0.571624	0.431	0.4784	0.696828	0.938246	0.946045	1.12542	1.267	1.27808	1.6477	2.032	1.5151	1.7521	1.49287	2.05641	1.94031	2.37445	1.80097	1.74784	2.11113	1.20329	1.60451	1.09017	1.16031	0.966773	1.17704	1.16694	0.68191
MAL6P1.165	1.121	0.97635	1.12682	1.05882	0.949856	0.750846	0.941	0.87271	0.760045	0.763035	1.096	0.855718	0.936916	0.939	1.32248	0.766158	0.414303	0.945	0.967236	0.709	0.745933	0.615454	1.39835	0.843684	0.89263	1.126	0.900317	1.27477	1.697	0.990004	1.01955	0.673641	0.814675	0.808015	0.721761	0.783745	0.995587	1.16913	0.965585	1.30342	1.47136	1.18797	1.16771	1.35698	1.07001	0.856933
MAL6P1.166	1.39	1.81438	1.8881	2.18341	1.79986	2.95011	1.917	2.41446	2.48316	2.37234	2.675	1.57204	1.34984	1.87	2.1323	1.42394	1.63968	1.611	2.32104	2.207	1.49094	1.65649	1.07447	1.50903	1.3164	1.172	0.855384	0.609594	0.618	0.533369	0.648126	0.58481	0.452063	0.352295	0.441895	0.360742	0.30247	0.351457	0.274094	0.430129	0.695618	0.758617	1.07815	1.03722	0.981893	1.41496
MAL6P1.168	0.62	0.870192	0.863003	1.46952	1.23116	1.91009	1.17833	1.93528	1.37173	2.09899	1.84	1.55957	1.89092	1.68633	2.03493	1.70779	2.42846	1.77767	1.89088	1.78633	1.44449	1.84013	1.03538	1.49517	1.22487	1.10367	0.954125	0.887199	0.712	0.843309	0.568712	0.536555	0.580308	0.507075	0.568571	0.514562	0.36326	0.429558	0.314659	0.391461	0.528492	0.608035	0.789187	0.797303	0.815307	0.862994
MAL6P1.172	1.731	1.60052	1.6743	2.60719	1.63789	2.40474	2.481	3.44229	3.96551	3.85525	2.733	2.42905	2.49892	2.136	1.76864	1.67392	1.28675	1.41	1.17944	0.945	0.954943	0.913827	0.688348	0.762914	0.677875	0.627	0.490099	0.48409	0.412	0.496507	0.546827	0.530523	0.486689	0.432019	0.424219	0.377223	0.413411	0.540335	0.457203	0.69733	0.95784	0.894272	1.4249	1.77875	1.45144	1.75478
MAL6P1.174	2.636	2.61174	2.00715	2.9614	2.40387	2.23098	1.989	2.27828	2.58337	2.81167	2.196	2.23416	2.29815	1.611	1.45801	1.27208	1.22318	0.999	0.868539	0.64	0.55736	0.468605	0.379809	0.291091	0.206559	0.216	0.158928	0.112058	0.127	0.200107	0.337663	0.452384	0.566521	0.886662	0.784608	0.672043	1.39984	1.5182	1.673	2.73718	3.34334	3.153	2.50305	1.88189	2.29234	1.81615
MAL6P1.175	0.5265	0.548616	0.472444	0.426309	0.363503	0.313275	0.202	0.205448	0.145762	0.178041	0.169	0.161334	0.239213	0.277	0.407015	0.340507	0.463077	0.6485	0.625085	0.8275	0.839755	1.14953	1.26708	1.47545	1.69633	1.6175	1.67332	1.8234	1.8565	1.8461	1.47446	1.45339	1.7087	1.47651	1.45285	1.21728	0.650206	0.805123	0.57321	0.658228	0.611852	0.61901	0.563185	0.614309	0.567106	0.557461
MAL6P1.176	0.602	0.703205	0.568442	0.540161	0.551647	0.313275	0.423	0.410896	0.208232	0.306755	0.424	0.273623	0.367362	0.339	0.519396	0.282685	0.419783	0.426	0.537902	0.559	0.512771	0.672509	0.942757	1.22994	1.28362	1.025	1.55434	1.45496	1.172	1.25105	1.42287	0.955765	1.67359	1.532	1.67724	1.19576	1.08586	0.980253	0.867776	0.606091	0.695618	0.879785	0.574093	0.735796	0.834609	0.813746
MAL6P1.178	2.399	1.79869	1.32636	1.06577	0.87131	0.918264	0.768	0.593845	0.733365	0.528729	0.584	0.36268	0.450659	0.637	0.380919	0.251146	0.338128	0.3605	0.246378	0.3505	0.242916	0.21887	0.155172	0.31948	0.257789	0.4065	0.44059	0.53967	0.7215	0.963298	1.41959	1.61542	2.00206	2.65406	2.57526	1.84903	2.78398	3.35438	2.8723	4.56328	3.09447	3.29327	2.41464	1.66242	2.23884	1.68204
MAL6P1.182	0.564	0.493987	0.408306	0.4592	0.323925	0.197858	0.242	0.300771	0.369611	0.285175	0.21	0.192311	0.210735	0.36	0.251701	0.128493	0.134813	0.554	0.50089	0.7089	0.623314	0.735177	1.36046	1.19475	1.51231	1.556	1.52022	2.25639	2.304	1.97098	2.12353	1.89755	1.95253	1.60203	1.21374	1.00532	0.688145	0.878642	0.577759	0.660834	0.643416	0.458331	0.592464	0.663821	0.680653	0.543255
MAL6P1.183	1.312	1.50404	1.46554	1.30296	1.17514	0.991827	1.232	1.33808	1.15048	1.55227	1.329	1.10611	1.38829	1.101	1.27197	0.973045	1.03576	1.239	1.19835	0.932	0.695771	0.967142	1.03027	0.999625	0.909024	1.081	1.06424	0.913495	1.004	1.07125	0.795384	0.972215	1.09842	1.40056	1.52601	1.21224	0.778415	0.944391	0.790438	0.795087	0.99426	0.939052	1.02189	0.812584	0.937834	1.00695
MAL6P1.184	0.791	0.890339	0.487955	0.551546	0.319054	0.233371	0.268	0.337479	0.268098	0.260511	0.214	0.170369	0.234941	0.152	0.242441	0.216102	0.236745	0.324	0.488553	0.545	0.462609	0.568687	0.907573	0.849281	1.01066	1.299	1.2706	1.63694	1.802	1.91005	2.00534	1.7569	1.73419	1.922	1.92764	1.34866	1.4404	1.31019	0.783614	0.675172	0.627634	0.716471	0.761247	0.795393	0.849715	0.709186
MAL6P1.185	0.418	0.383566	0.309373	0.335228	0.283739	0.265079	0.257	0.217881	0.238165	0.325253	0.408	0.431085	0.623661	0.604	0.763521	0.852728	0.960131	1.04	1.19177	1.354	1.42034	1.35437	1.7962	1.50903	1.60329	1.764	1.83392	1.73017	1.933	1.5151	1.41725	1.15728	1.21191	0.968541	1.04778	0.815791	0.608341	0.553485	0.473126	0.469232	0.543869	0.495208	0.504054	0.585657	0.521158	0.445514
MAL6P1.189	0.825	0.743886	0.775529	1.29158	0.831733	0.766066	0.911	0.934285	1.59818	1.44591	1.21	1.35134	1.68873	1.292	1.41256	1.34801	1.19797	1.734	1.36367	1.409	1.33116	1.15889	1.32798	0.980432	0.921319	1.143	1.00766	1.10982	1.056	1.18936	1.19401	1.13261	0.865652	0.858651	0.746311	0.574991	0.63974	0.60967	0.417397	0.552651	0.458889	0.488623	0.700394	0.727773	0.804397	0.611446
MAL6P1.190	0.809	0.50561	0.663182	0.411129	0.433524	0.55172	0.517	0.394318	0.778265	0.42545	0.443	0.588548	0.709094	0.637	1.22062	0.807172	0.784765	1.142	1.30363	1.133	1.33488	1.10744	2.36185	1.5954	1.0828	1.345	1.07506	1.38055	1.342	0.974206	1.25967	0.908881	0.934905	0.77354	0.825852	0.802057	1.24546	0.903746	0.796125	0.809424	0.986976	0.827103	0.606242	0.647546	0.704949	0.639858
MAL6P1.191	2.522	2.73378	2.76508	2.97784	3.08703	3.38388	2.318	2.42511	2.23458	2.72534	2.147	2.40195	2.54448	1.506	1.70635	1.23003	1.23853	0.97	0.63331	0.632	0.459822	0.445222	0.39244	0.311883	0.215576	0.234	0.183891	0.122815	0.102	0.103815	0.0862917	0.168616	0.190444	0.305969	0.378065	0.441314	0.667213	1.03405	1.29313	2.07635	2.58702	2.58009	3.32744	2.93745	4.23095	3.01177
MAL6P1.192	0.752	0.812463	0.840087	0.541426	0.5553	0.627819	0.467	0.589701	0.428176	0.545685	0.585	0.6505	0.921253	0.845	1.26776	1.16812	1.57063	1.362	1.48622	1.97	2.06688	2.34864	2.00911	1.6034	1.60247	1.36	1.48943	0.974454	1.048	0.713164	0.741921	0.660481	0.622308	0.632407	0.693284	0.68303	0.51938	0.688568	0.714238	0.782053	1.16665	1.20378	1.31927	2.02057	1.94616	1.33654
MAL6P1.193	1.173	1.31226	1.71706	1.99113	1.7341	1.92658	1.577	1.68384	1.70099	2.07638	1.809	1.69853	2.0091	1.404	1.45044	1.32582	1.4391	1.248	1.27978	1.309	1.29215	1.21314	1.25581	1.14677	1.03853	1.089	1.08504	0.883015	1.005	0.735733	0.685644	0.645676	0.699255	0.578539	0.6324	0.524633	0.39117	0.48654	0.334372	0.522672	0.817017	0.813933	1.00696	1.19424	1.35325	1.08537
MAL6P1.197	1.276	1.51334	1.59046	2.28588	1.02292	1.52325	1.538	1.47899	2.63543	2.1812	2.554	1.27002	1.22027	1.486	1.60449	0.916975	1.18263	1.013	1.9501	2.508	1.37668	1.36092	1.99919	1.39708	1.10575	1.313	0.914462	0.83102	0.766	0.725953	0.691271	0.72875	0.615575	0.516053	0.507688	0.37997	0.223713	0.38732	0.244524	0.318035	0.517161	0.69935	0.820953	0.882496	1.04861	1.09446
MAL6P1.198	1.2775	1.35817	1.80719	1.53952	1.59953	1.83843	1.4175	1.94021	1.38149	2.16578	1.627	1.64561	2.25187	1.437	1.54851	1.31939	1.56295	1.431	1.30898	1.6045	1.22294	1.42265	1.35144	1.14837	1.22337	1.0755	0.941505	0.866431	0.869	0.632294	0.526192	0.46061	0.48188	0.381383	0.427165	0.391873	0.255765	0.349664	0.345177	0.447725	0.581503	0.701325	0.87377	1.28707	1.25317	1.14788
MAL6P1.199	0.491	0.448656	0.354647	0.45667	0.319054	0.232103	0.402	0.409712	0.533593	0.539519	0.483	0.560153	0.744691	0.753	1.06994	0.962532	1.04014	1.411	1.42371	1.554	1.67208	1.31883	1.60314	1.50264	1.5746	1.694	1.5094	1.48633	1.483	1.55346	1.5692	1.28971	1.27155	1.05365	1.02225	0.653731	0.66983	0.60967	0.426495	0.393633	0.44068	0.406966	0.483386	0.428641	0.464511	0.492111
MAL6P1.200	2.1855	1.9126	2.64707	2.42693	2.33019	2.78523	2.3525	3.49824	2.136	3.55196	2.119	2.16188	2.72496	1.4935	1.03374	1.19616	1.11659	0.66875	0.52721	0.51725	0.441243	0.571493	0.456042	0.476021	0.445086	0.42225	0.395033	0.319365	0.353	0.254836	0.311635	0.293639	0.503762	0.667421	0.712923	0.729039	0.82355	1.14403	1.19987	2.03334	1.77213	2.13954	1.85949	1.97129	2.35434	1.87781
MAL6P1.201	0.614	0.605957	0.92253	1.0352	1.09436	1.17235	1.107	1.57688	1.30839	1.88369	1.48933	1.72649	2.40779	1.49633	1.59888	1.52712	1.64443	1.618	1.35764	1.48567	1.39185	1.42733	1.57006	1.27979	1.2399	1.26767	1.1799	1.12237	0.97	0.817481	0.685644	0.528056	0.54472	0.523594	0.501141	0.457795	0.344945	0.457452	0.33134	0.373647	0.450796	0.486867	0.618872	0.791954	0.805236	0.826626
MAL6P1.202	0.541	0.52072	0.558465	0.590761	0.365329	0.688276	0.594	1.14506	1.54612	1.77271	2.075	0.988657	1.1149	1.506	1.81157	1.41459	1.43581	3.685	2.79643	3.434	2.09289	1.71354	2.12008	2.22557	2.19674	2.196	1.09336	1.03541	1.022	0.921547	0.815081	0.880916	0.803133	0.607628	0.531256	0.309469	0.277351	0.333525	0.14444	0.397543	0.303498	0.301603	0.475349	0.594825	0.514864	0.611446
MAL6P1.203	0.636	0.593947	0.776368	0.690697	0.727005	0.715333	0.883	0.997044	1.35611	1.53224	2.423	1.21194	1.3057	1.745	2.01529	1.42978	1.64954	1.619	2.01179	1.941	1.50394	1.60224	2.03618	1.97286	1.10739	1.22	1.10834	0.983419	0.826	1.01784	1.10491	0.958232	1.07918	1.03534	1.27069	0.976019	1.08455	0.749535	0.467439	0.659531	0.684692	0.599255	0.784211	0.55815	0.74649	0.719415
MAL6P1.206	1.058	1.41106	1.41356	2.31118	1.87657	1.54482	1.483	2.05566	2.39596	2.12571	2.457	1.97731	2.6171	1.866	1.86124	2.0886	1.96739	2.145	1.93776	1.689	1.4287	1.29451	0.897649	0.983631	0.890171	0.795	0.800467	0.664278	0.555	0.545405	0.547765	0.370955	0.370307	0.339367	0.414399	0.299398	0.223713	0.317985	0.30139	0.371475	0.531729	0.62823	0.942661	0.602848	0.988187	0.967175
MAL6P1.210	1.127	1.28088	1.40853	1.54964	1.52708	1.60189	1.387	2.07816	1.92874	2.41705	1.928	2.15285	2.20132	1.903	2.03044	2.31522	2.38279	1.899	2.15243	2.189	2.43566	2.24014	1.38391	1.51943	1.36313	0.914	0.877019	0.640074	0.485	0.428801	0.483984	0.304331	0.288551	0.263952	0.315218	0.27193	0.257727	0.279731	0.285468	0.376689	0.528087	0.650619	0.62002	0.772471	0.872374	0.902394
MAL6P1.211	0.626667	0.676471	0.61148	0.529619	0.600764	0.666714	0.422667	0.669433	0.528387	0.742481	0.716667	0.768382	1.14006	0.873667	1.05984	1.10232	1.69557	1.31033	1.82761	1.925	1.54203	2.33492	2.37178	1.93981	1.7634	1.377	1.37405	1.09398	0.897667	0.807701	0.70409	0.674738	0.871744	0.818789	0.820942	0.840512	0.577684	0.699327	0.540607	0.606525	0.74701	0.80164	0.608921	0.684603	0.621446	0.569016
MAL6P1.213	2.624	2.23863	1.62903	1.50157	2.33567	1.24422	1.963	1.35821	1.33919	0.926432	1.119	0.95639	1.0494	0.603	1.29049	0.707881	0.50637	0.766	0.652885	0.5634	0.791451	0.520984	0.45108	0.525163	0.51066	0.601	0.312032	1.27118	0.825	0.727458	1.0702	0.97715	0.776202	1.12691	1.14794	0.865233	1.35013	1.47875	1.20442	1.30342	1.03068	1.60679	1.51101	2.70938	3.35732	3.08678
MAL6P1.214	1.2645	1.70222	1.73216	1.83364	1.87597	2.1701	1.523	2.23684	1.50122	2.45096	1.9035	1.87083	2.67334	1.591	1.8322	1.63362	2.37128	1.567	1.9501	2.0885	1.65118	1.56108	1.43849	1.22994	1.10862	0.879	0.705609	0.531602	0.481	0.297152	0.275289	0.221668	0.182268	0.200927	0.267592	0.207381	0.19951	0.239086	0.274094	0.359744	0.575433	0.7573	0.78823	1.1673	1.26765	1.28199
MAL6P1.215	0.466	0.516071	0.619585	0.846294	0.646633	0.809189	0.813	1.45412	1.63071	2.53112	2.032	2.85368	3.54262	2.587	2.4926	2.44955	2.64036	2.496	2.84578	2.325	2.11146	1.46848	1.337	1.04361	0.864761	0.708	0.539192	0.393547	0.315	0.19785	0.210101	0.182599	0.163512	0.134669	0.169884	0.163891	0.154375	0.144647	0.125105	0.191603	0.212449	0.238385	0.341011	0.495115	0.440593	0.62622
MAL6P1.216	1.328	1.67026	0.731932	1.33459	0.72457	0.68743	0.503	0.421553	0.501057	0.28055	0.372	0.170369	0.152356	0.128	0.175096	0.0724235	0.0756268	0.264	0.213022	0.187	0.102183	0.0972754	0.17141	0.209521	0.287707	0.496	0.583292	1.05603	0.948	1.51961	2.22107	2.40339	2.41036	3.17065	3.17477	2.84382	3.97319	3.10453	1.8163	1.87562	1.5794	1.87415	1.59139	0.959285	1.37717	1.20698
MAL6P1.220	0.994	0.889176	0.993516	0.98924	0.990042	0.651917	0.966	1.09296	1.10883	0.938764	1.267	0.95639	1.19464	0.863	1.13392	0.842215	0.706946	1.135	0.929402	1.04	1.02926	0.694022	1.19085	0.804498	0.864761	0.884	0.963556	0.917977	0.994	0.99828	0.927636	1.0775	0.894507	0.945917	1.06055	1.10786	0.94064	1.16076	0.748357	0.806818	0.956627	0.974612	0.920845	0.818315	1.02343	1.16607
MAL6P1.221	1.838	1.52729	0.826672	1.08665	0.750143	0.580891	0.735	0.767321	0.681958	0.558017	0.559	0.442702	0.477001	0.481	0.45626	0.376135	0.538156	0.437	0.41782	0.227	0.196005	0.167426	0.126302	0.203924	0.17951	0.227	0.227159	0.43837	0.574	0.856098	1.20715	1.58664	1.86019	2.61258	2.21733	1.59404	3.27981	3.45001	2.96158	3.16992	2.16819	1.99269	1.95766	1.71113	1.96756	1.43201
MAL6P1.224	0.503	0.554428	0.492985	0.565461	0.338538	0.465474	0.277	0.400239	0.322759	0.220432	0.377	0.285239	0.337461	0.458	0.768572	0.357445	0.544732	0.831	0.704865	0.9	0.866695	1.02326	1.72313	1.5882	1.34181	1.797	1.60925	1.85478	1.817	1.44814	1.95563	1.16715	1.33503	1.03749	0.97806	0.744375	0.633198	0.894182	0.624389	0.63998	0.66891	0.704618	0.611983	0.712874	0.664666	0.610309
MAL6P1.225	1.102	1.04377	0.981778	0.942435	1.21776	0.985485	1.209	1.02191	1.14527	0.884812	1.185	0.84152	0.649291	1.373	1.12466	0.829236	0.779284	0.904	1.33653	0.999	0.537852	0.623872	1.20258	0.754117	0.809023	1.046	0.954403	1.27835	1.12	0.918538	1.04019	0.673641	0.830064	1.07735	0.796392	0.766349	1.08978	0.981449	1.04747	1.56411	1.21399	1.62391	1.12063	0.936363	1.21604	0.73078
MAL6P1.228	0.827	0.621842	0.648929	0.475645	0.46275	0.764798	0.378	0.440499	0.28762	0.374581	0.249	0.26846	0.4471	0.31	0.266012	0.179891	0.178655	0.375	0.244277	0.273	0.339061	0.57804	0.714511	1.02442	1.24509	1.147	1.37045	1.7992	1.679	1.32928	2.09914	1.74949	2.55945	2.31631	2.03468	1.82569	1.1081	1.13207	0.896209	0.917608	0.812161	1.00622	0.754358	0.670468	0.756561	0.698957
MAL6P1.229	0.941	0.819437	1.10083	0.833644	0.651504	0.667137	1.242	0.609831	0.610379	0.870938	0.998	0.357517	0.384449	0.979	1.06994	0.360949	0.533771	0.655	0.607813	0.538	0.46168	0.410614	0.562046	0.855679	1.11148	1.017	1.12997	1.66652	1.355	1.74379	1.89842	1.82681	2.04583	2.10084	2.02584	1.17562	0.828129	0.839193	0.680118	0.758591	1.18607	1.11158	1.18263	1.18277	0.674737	1.57067
MAL6P1.23	1.29	1.43431	0.883684	1.02846	0.668552	0.545378	0.617	0.725877	0.519277	0.497899	0.688	0.300727	0.461338	0.612	0.718905	0.351604	0.568845	1.061	1.30445	1.26	0.968877	1.09622	1.63562	1.3363	1.2746	1.48	1.04926	1.28104	1.174	1.25029	0.902311	0.902301	1.17729	1.38979	1.50342	1.37613	1.04792	1.32095	1.04065	1.58235	1.21399	1.61996	1.22971	1.33062	1.17072	1.13652
MAL6P1.231	0.403	0.369618	0.570119	0.53257	0.445702	0.511133	0.636	0.819423	0.83683	1.08675	1.101	1.04157	1.51786	1.266	1.39488	1.40992	1.48075	1.55	1.51419	1.381	1.35531	1.34128	1.49488	1.3267	1.4205	1.416	1.22566	1.29628	1.179	0.954647	0.844158	0.615243	0.696369	0.804783	0.716851	0.530127	0.464433	0.480563	0.384414	0.364958	0.403046	0.466233	0.439755	0.575342	0.469546	0.506886
MAL6P1.232	0.621	0.560239	0.521491	0.75458	0.598227	0.51906	0.571	0.675551	0.943224	0.843962	0.681	0.797637	0.979632	0.8	0.902419	0.865578	0.75983	1.0755	0.908018	0.83425	0.970271	0.861214	1.00343	1.0594	1.01804	1.224	1.20569	1.31152	1.279	1.72423	1.88083	1.63023	1.55072	1.51611	1.48427	1.3244	1.17351	1.03943	0.693481	0.731545	0.574826	0.496525	0.610835	0.498553	0.518011	0.612014
MAL6P1.235	1.153	1.25647	1.33475	1.62807	1.32371	1.35837	1.012	0.940206	0.993004	0.981925	1.029	1.12289	1.66737	1.013	1.20042	0.913471	1.11358	1.291	0.697463	0.982	0.806314	0.740789	0.953583	0.815694	0.858204	1.161	1.21734	1.24339	1.35	1.55196	0.910752	0.997713	0.931057	0.837104	0.872987	0.744375	0.710386	0.739972	0.534541	0.761198	0.950557	0.862663	1.20904	1.48534	1.47787	1.23767
MAL6P1.237	0.479	0.733425	0.629646	0.914604	1.10329	0.705186	0.762	1.12967	0.618187	1.41817	1.071	1.23776	1.63604	0.993	0.924306	1.12724	1.23524	1.205	1.22303	1.099	0.952156	1.59101	1.32798	1.40747	1.55985	1.265	1.447	1.21112	1.342	0.97872	0.882614	0.843902	1.03782	1.10752	1.0959	0.791985	0.495831	0.604888	0.408298	0.464018	0.446749	0.579499	0.504054	0.51116	0.592912	0.693275
MAL6P1.24	1.2455	1.52439	1.92541	2.36115	2.01175	1.84033	2.066	2.46241	2.05889	2.77005	2.822	1.98312	2.72603	2.03	2.02245	1.69728	1.74161	1.833	1.65606	1.3795	1.13701	1.24353	1.02756	0.944446	0.827056	0.818	0.727243	0.525775	0.4745	0.468296	0.361112	0.330652	0.286146	0.363607	0.374628	0.37173	0.38005	0.533162	0.354844	0.466625	0.827336	0.824469	0.967921	1.35985	1.30478	1.17232
MAL6P1.242	0.806	0.739237	0.684981	0.657807	0.411604	0.352593	0.254	0.26051	0.327965	0.240472	0.175	0.189729	0.19792	0.1561	0.21887	0.182227	0.170982	0.245	0.382453	0.369	0.464467	0.474217	1.01042	0.806098	1.15165	1.379	1.49942	1.99463	2.428	2.11692	2.70599	2.15828	2.23915	2.02543	2.32535	1.59954	1.37367	1.09741	0.82342	1.10269	0.637346	0.745446	0.82899	0.710581	0.886221	0.687592
MAL6P1.244	0.998	1.07863	1.03879	1.61795	1.21533	1.42559	1.486	2.08527	2.90743	2.74692	2.07	2.25739	2.42203	1.95	1.99256	2.06057	2.01233	1.497	1.71816	1.899	1.93497	1.55079	1.69155	1.30831	1.49427	1.16	1.25312	1.00224	0.895	0.671036	0.965154	0.62429	0.51843	0.468649	0.500814	0.347009	0.327065	0.271363	0.252485	0.387116	0.495309	0.607157	0.62691	0.915733	0.986928	0.930807
MAL6P1.245	0.531	0.582323	0.519814	0.779248	1.02049	1.11485	1.015	1.48372	1.72442	1.85595	1.544	1.71144	1.96354	1.305	1.51357	1.3118	1.56953	1.23	1.23948	1.391	1.26056	1.28796	1.55081	1.24833	1.06722	1.213	1.10335	0.900048	0.899	0.767329	0.835716	0.556021	0.58672	0.527903	0.545003	0.467866	0.455275	0.357434	0.31845	0.393633	0.40426	0.508379	0.45583	0.684221	0.625642	0.689865
MAL6P1.247	1.736	2.02012	0.913028	1.14863	1.29448	0.508597	0.597	0.541151	0.38653	0.345292	0.346	0.214252	0.192224	0.095	0.0959662	0.0525654	0.0416495	0.123	0.0682658	0.045	0.0241523	0.0318016	0.0270648	0.0455829	0.0573775	0.141	0.257947	0.545945	0.818	1.01333	1.79243	2.04971	2.74989	4.42685	4.62418	4.58344	5.08521	5.21686	3.85893	4.55285	2.27988	2.35224	1.55235	1.25842	1.4036	1.36268
MAL6P1.249	1.646	1.16348	0.839248	1.26628	1.21776	1.17193	0.821	1.18651	1.13746	0.690585	0.633	0.814416	0.616542	0.511	0.455419	1.06883	0.965611	0.862	0.82248	0.879	0.928933	0.93534	0.903062	0.7997	0.820499	0.853	0.832086	0.897358	0.904	0.752283	1.20715	0.821694	1.83807	2.41866	1.60064	0.914674	1.33573	1.19543	1.13732	1.30342	1.21521	1.31836	1.14933	1.14725	1.2601	1.13652
MAL6P1.25	0.535	0.612544	0.60617	1.15243	0.907234	0.934753	0.987	0.946126	1.7075	1.81587	1.729	1.78629	2.10165	1.762	2.15587	2.09444	2.10878	2.349	1.93118	2.194	1.95726	1.59195	1.65997	1.36269	1.19099	1.274	0.934433	0.88929	0.762	0.536378	0.556206	0.49022	0.392429	0.387847	0.405561	0.360742	0.29305	0.384929	0.321862	0.290663	0.344774	0.404332	0.448941	0.535228	0.524935	0.670544
MAL6P1.254	0.5965	0.792704	0.849309	0.74446	1.33467	1.4091	0.979	2.20901	0.796486	2.60125	1.402	2.23545	3.46858	1.6875	0.939459	1.90112	1.83313	1.187	1.09225	1.1415	1.37389	1.72056	1.08304	1.37948	1.62337	0.955	1.22483	1.1645	0.997	0.664266	0.819771	0.649788	0.928172	0.809632	0.685919	0.62077	0.380704	0.485345	0.378159	0.444467	0.421256	0.683545	0.511517	0.921464	0.826426	0.780787
MAL6P1.255	1.757	1.63306	1.78246	2.1151	1.60867	1.87712	1.453	1.57017	1.34049	1.61393	1.486	1.22098	1.52498	1.123	1.34942	1.16812	1.24729	1.289	1.51007	1.294	1.42591	0.925051	0.979746	0.846882	0.848368	0.804	0.76968	0.663382	0.615	0.672541	0.650001	0.701607	0.696369	0.805861	0.976096	0.919252	1.07539	1.22651	0.991744	1.21609	1.36453	1.31441	1.53168	1.80625	1.97134	1.46042
MAL6P1.257	0.528	0.659037	0.736124	1.02972	0.882879	0.943631	0.842	0.980466	0.929233	1.17307	1.109	1.14096	1.44382	1.148	1.43949	1.05365	1.27798	1.594	1.49609	1.315	1.17417	1.13363	1.64013	1.24513	1.1328	1.34	1.19571	1.38593	1.236	1.31875	0.635932	0.773988	0.611728	0.486964	0.525364	0.507237	0.442192	0.52599	0.448104	0.407971	0.434609	0.391162	0.656762	0.692244	0.715019	0.640995
MAL6P1.258	0.4215	0.419017	0.380219	0.429472	0.433524	0.410936	0.364	0.445236	0.592158	0.708312	0.682	0.704709	0.855754	0.815	0.94451	0.822357	1.24401	0.934	1.36532	1.241	1.53599	1.2585	1.75199	1.57581	1.49346	1.527	1.55975	1.70417	1.711	1.37517	1.43835	1.0738	1.0484	0.890433	0.87937	0.743917	0.741784	0.592336	0.490754	0.544178	0.614887	0.549207	0.483386	0.611444	0.589765	0.501204
MAL6P1.259	0.638	0.757834	0.618747	0.828583	0.84391	0.541573	0.603	1.18414	0.806897	1.13453	1.619	1.37844	1.14623	1.312	1.05226	1.36086	1.34046	1.293	1.48046	1.351	1.30051	1.67706	0.829085	1.53862	1.66149	1.107	0.79797	1.32138	0.982	0.652229	0.788818	0.653079	0.767545	0.585003	0.708995	0.528295	0.388554	0.546312	0.269545	0.370172	0.539013	0.545256	0.498313	0.566173	0.566477	0.679637
MAL6P1.260	0.49	0.464929	0.518976	0.426309	0.422564	0.383033	0.273	0.41208	0.303237	0.331419	0.359	0.380749	0.553891	0.404	0.665871	0.44155	0.693793	0.722	0.747634	0.966	0.938222	1.23371	1.45158	1.23154	1.5746	1.786	1.53104	1.87629	2.078	1.54143	1.42287	1.19512	1.5274	1.37255	1.35907	1.12709	0.96288	0.739972	0.535678	0.753377	0.722326	0.733593	0.684319	0.791954	0.686066	0.55121
MAL6P1.263	0.978	1.01006	1.28864	1.19544	1.10938	1.53721	1.059	1.30847	1.16349	1.51065	1.384	1.00544	1.33133	1.219	1.22736	1.02795	1.15851	1.103	1.24606	1.772	0.94008	1.51993	1.69426	1.56741	1.56969	1.572	1.23315	1.13582	1.1	0.980977	0.896683	0.934379	0.918553	0.705667	0.763005	0.536536	0.51153	0.357434	0.424221	0.439253	0.552367	0.749397	0.729098	1.00169	0.99574	0.861479
MAL6P1.265	0.929	1.07282	0.88033	0.795693	0.88775	0.760993	0.582	0.819423	0.709289	0.790781	0.925	0.773114	0.925525	0.94	0.857635	0.834038	0.861487	1.141	1.617	1.371	1.12215	1.33473	1.94415	1.47145	1.70001	1.619	1.73989	1.63784	1.837	1.15701	1.40693	0.951652	1.15613	1.01379	1.09688	0.692186	0.613574	0.675419	0.680118	0.69733	0.710186	0.730959	0.564908	0.626916	0.577806	0.596671
MAL6P1.266	0.613	0.569538	0.471186	0.5098	0.342192	0.574549	0.792	0.909418	1.45241	1.47212	2.099	1.23259	2.15861	2.01	2.05317	1.87483	2.2414	2.51	2.65579	2.455	1.45842	1.98199	1.68072	1.89449	1.43526	1.49	0.944418	1.03631	0.822	0.917785	1.08427	0.838145	0.780049	0.516053	0.492958	0.437652	0.349306	0.400469	0.349158	0.232009	0.558437	0.384577	0.601649	0.189106	0.428005	0.640995
MAL6P1.267	0.546	0.549197	0.508496	0.372546	0.338538	0.356398	0.322	0.503259	0.352692	0.814674	0.7505	0.663407	1.03516	0.861	0.771097	1.08402	1.29716	1.05	1.23989	1.3905	1.24988	1.85618	1.69651	1.83451	2.13444	1.653	1.67083	1.68311	1.5495	1.01897	0.836654	0.845547	0.956546	0.908209	0.923069	0.773674	0.496485	0.698729	0.528286	0.588495	0.617315	0.734251	0.605668	0.924902	0.823279	0.78306
MAL6P1.268	0.806	0.786892	0.87027	0.704612	0.798853	0.81553	0.628	0.724692	0.585651	0.733746	0.564	0.663407	0.995295	0.598	0.792142	0.579388	0.831894	0.682	0.871829	0.798	0.723639	1.03729	1.5039	1.08679	1.0787	1.186	1.11916	1.42179	1.183	1.14648	1.09928	0.936847	1.19171	1.24865	1.18231	1.01173	0.97073	1.2026	0.808635	0.808121	0.74782	0.96671	0.775026	0.983353	0.856009	0.930807
MAL6P1.27	0.352	0.304528	0.403275	0.296013	0.33245	0.30186	0.335	0.39787	0.307141	0.582681	0.477	0.729231	0.939763	0.797	0.966397	1.17046	1.495	1.33	1.53722	1.553	1.77984	1.70419	1.80342	2.10241	2.0992	1.444	1.85472	1.60915	1.349	1.07501	0.842282	0.579052	0.679056	0.637794	0.613742	0.488925	0.291742	0.511644	0.311626	0.368868	0.387264	0.5255	0.331826	0.468755	0.431781	0.675091
MAL6P1.271	0.698	0.586973	0.484601	0.49209	0.418911	0.381765	0.329	0.324454	0.33317	0.334502	0.289	0.303309	0.360243	0.361	0.468888	0.311888	0.473489	0.577	0.644002	0.694	0.729212	0.626678	1.2531	1.13717	1.20575	1.436	1.65169	1.74362	1.872	1.88372	1.78211	1.93209	1.73996	1.67636	1.60653	1.19118	0.851678	0.992208	0.655097	0.732523	0.71747	0.686179	0.75321	0.722042	0.832091	0.650087
MAL6P1.272	0.629	0.848263	0.940193	0.950784	1.10451	1.26629	0.8682	1.5138	0.765771	1.53871	1.0994	1.07875	1.63319	0.906	0.944846	0.900855	1.09757	0.8886	0.708813	0.9464	0.704689	1.17161	1.06888	1.26001	1.59755	1.2614	1.38992	1.35688	1.4606	1.13535	0.754677	0.840119	1.09265	0.97242	0.984738	0.888489	0.541358	0.564722	0.389874	0.471317	0.565964	0.691974	0.724965	1.12203	1.03854	0.980359
MAL6P1.273	0.473	0.456793	0.487116	0.359264	0.270344	0.21701	0.382	0.190646	0.184805	0.234306	0.313	0.179404	0.247756	0.225	0.532865	0.374967	0.43184	1.025	0.84222	1.101	0.912212	1.04384	1.65095	1.56661	1.76887	2.049	1.64587	2.10848	2.263	1.94315	1.86653	1.62858	1.57645	1.25835	1.22454	0.958623	0.50368	0.704109	0.42877	0.611304	0.446749	0.451746	0.570649	0.401135	0.456958	0.493248
MAL6P1.275	0.839	0.756672	1.28864	0.834909	1.12034	1.00324	0.888	0.979282	0.976085	1.03588	1.104	1.06997	1.22027	1.334	1.52283	0.92632	0.904233	1.47	1.49198	1.19	1.14909	1.12241	1.2955	1.0724	1.32952	1.221	0.947746	1.24608	1.475	1.10435	1.08146	1.01499	0.852187	0.842491	0.846474	0.825862	0.794114	0.738776	0.622115	0.615215	0.934775	0.673009	0.839324	0.951262	1.14806	0.675091
MAL6P1.277	0.9795	0.894988	0.790621	0.750785	0.624713	0.660795	0.5355	0.702786	0.524483	0.631238	0.5065	0.422051	0.547483	0.483	0.501718	0.430453	0.458145	0.56	0.468814	0.549	0.488247	0.555592	0.719924	0.881669	0.947139	1.046	1.20112	1.63111	1.6435	1.38157	1.44585	1.483	1.74044	2.01627	1.82011	1.50477	1.33901	1.51043	1.12652	1.23108	1.12112	1.2986	1.10513	1.12547	1.11281	0.992747
MAL6P1.278	0.719	0.642764	0.599743	0.500102	0.539469	0.424888	0.396667	0.485497	0.464183	0.515369	0.533667	0.588978	0.905116	0.832	1.01999	1.11517	1.3927	1.42233	1.22193	1.515	1.24972	1.79149	1.23476	1.69643	1.4746	1.39867	1.24258	1.31959	0.928	0.953895	1.15493	0.883109	1.07245	1.10967	1.02421	0.825252	0.680296	1.00217	0.721441	0.839838	0.720707	0.813494	0.734839	0.409157	0.641168	0.476958
MAL6P1.279	1.254	1.20649	1.00442	1.47501	1.47471	0.943631	1.057	1.27413	1.619	1.68947	1.107	1.19517	1.14623	1.115	1.18695	1.03262	1.03357	0.93	0.586428	0.647	0.937293	0.711794	0.428526	0.523004	0.584431	0.687	0.540856	0.678622	0.821	0.757549	1.51104	1.17373	1.5274	2.31523	1.76856	1.48142	2.33394	1.97724	0.939427	1.07141	1.0586	1.0431	1.077	1.01201	1.26513	1.024
MAL6P1.28	0.379	0.369618	0.286736	0.53004	0.387249	0.426156	0.506	0.56957	0.757442	1.02663	1.392	0.864752	1.32991	1.511	1.80063	1.47767	1.94547	1.605	2.19355	2.795	1.99906	1.68361	2.41418	1.48424	1.54018	1.777	1.39208	1.14657	1.21	0.868887	0.96234	0.986198	0.840645	0.61086	0.558751	0.54386	0.214555	0.414815	0.293429	0.307607	0.269506	0.442526	0.579834	0.507595	0.563959	0.49893
MAL6P1.282	1.701	1.72954	1.59466	1.83933	1.91067	1.93546	1.55	2.22973	2.05498	2.26906	1.791	1.7579	1.53922	1.176	1.36626	1.14826	1.18592	0.908	0.888278	0.974	1.08128	0.826841	1.15657	0.802099	0.757383	0.771	0.659012	0.583597	0.553	0.559699	0.630304	0.515718	0.584796	0.680888	0.806212	0.619854	0.800656	0.949172	1.05088	1.56671	2.22282	2.3957	2.13563	1.83032	1.93987	2.2969
MAL6P1.283	0.702	0.662524	0.722709	1.03225	0.809813	1.05397	1.01	1.12138	1.4355	1.46133	1.447	1.19904	1.50505	1.282	1.32417	1.09103	1.09494	0.963	1.06182	1.151	1.07385	0.838065	0.93554	1.0564	0.948369	1.247	1.12248	1.25236	1.113	1.56249	1.23997	1.44105	1.25231	1.06335	1.08117	1.06575	1.15781	0.857124	0.694903	0.74686	0.560865	0.553158	0.794545	0.712874	0.859786	0.855797
MAL6P1.284	1.0955	1.0798	1.02202	1.24857	1.00526	1.05524	0.9765	1.13322	1.17781	1.09214	0.987	0.792474	0.928372	0.783	0.914625	0.956691	0.998492	0.7925	1.02317	1.0195	1.03251	1.00081	1.07537	1.12558	1.05124	1.071	1.10418	1.17212	1.233	1.02198	1.19542	1.16592	1.42544	1.57455	1.82944	1.51072	1.2278	1.33829	0.734141	1.13723	0.83462	0.946954	0.954717	0.978769	1.07316	0.912622
MAL6P1.285	1.897	2.41995	1.02034	1.5585	0.72457	0.424888	0.498	0.376556	0.291524	0.32217	0.36	0.205217	0.29332	0.24	0.396492	0.322401	0.383614	0.576	0.647292	0.733	0.769157	0.97743	1.28919	1.25393	1.25985	1.393	1.38209	1.47289	1.601	1.18259	1.33752	1.43529	1.39659	1.28852	1.32077	1.31021	1.11464	1.24086	1.09183	1.2956	1.38274	1.29465	1.02533	1.06587	1.06875	0.908076
MAL6P1.286	2.571	2.04801	1.00609	1.23845	0.885314	0.752114	0.722	0.557729	0.57524	0.380747	0.37	0.271042	0.243484	0.155	0.149842	0.0829366	0.0800109	0.1	0.060041	0.073	0.0566649	0.0720212	0.0766836	0.0751718	0.0942631	0.13	0.133134	0.234873	0.382	0.81397	0.918256	1.39499	1.94195	2.77203	2.69556	2.38877	3.29028	4.67772	5.00535	6.53275	4.23077	3.57314	2.74416	1.9839	2.39053	1.43087
MAL6P1.287	0.5845	0.629979	0.482505	0.408599	0.396078	0.318031	0.238	0.267615	0.142183	0.179198	0.1085	0.107771	0.118182	0.06775	0.094914	0.0426364	0.0676805	0.1095	0.0873885	0.119	0.14352	0.235706	0.477694	0.61277	0.952057	0.957	1.43015	1.67863	2.05025	1.92472	1.66088	1.9177	2.82419	3.06534	3.27493	2.48354	1.37629	1.53942	0.973547	0.915002	0.745088	0.847517	0.753497	0.833501	0.78992	0.715153
MAL6P1.288	0.59	0.536993	0.546643	0.430104	0.405515	0.502255	0.437	0.505627	0.579144	0.729122	0.804	0.793765	0.975361	0.891	0.911679	0.947346	0.934922	0.957	1.02892	1.06	1.07106	1.0588	1.49127	1.3203	1.41886	1.419	1.52105	1.56612	1.654	1.44514	1.72302	1.30862	1.49085	1.25943	1.33158	1.07399	0.737859	0.840388	0.490185	0.735129	0.694404	0.690131	0.624613	0.712874	0.726349	0.546664
MAL6P1.289	1.883	1.5517	0.925605	1.22453	0.775716	0.816799	0.639	0.595621	0.502359	0.399244	0.313	0.312343	0.390144	0.248	0.259277	0.193908	0.283874	0.287	0.20233	0.26	0.257314	0.402196	0.379809	0.462227	0.486889	0.525	0.495923	0.683104	0.749	1.02085	1.38911	1.50521	2.02755	2.493	2.41471	1.95204	2.3758	3.71659	3.85552	4.50593	3.29235	2.7895	2.50305	1.56213	1.85049	1.5593
MAL6P1.29	1.47	1.5238	1.70533	1.92535	1.55143	1.70843	1.434	1.47662	1.65934	1.71721	1.597	1.42361	1.73856	1.3	1.70887	1.08635	1.46431	1.427	1.40809	1.431	1.12308	0.89325	1.18273	0.911658	0.873778	1.085	0.943585	0.942182	0.876	0.966684	0.5956	0.578229	0.511697	0.466494	0.443859	0.395535	0.285201	0.510449	0.417397	0.496603	0.871647	0.758617	1.25267	1.48993	1.45647	1.39451
MAL6P1.291	0.827	0.819437	0.494662	0.445285	0.388467	0.343715	0.204	0.273536	0.213437	0.172646	0.157	0.154881	0.24206	0.181	0.309786	0.255819	0.258665	0.441	0.52721	0.677	0.859263	0.794104	0.92742	1.19635	1.39181	1.414	1.43618	1.56074	1.61	1.63471	2.82511	1.914	2.04967	1.73023	1.50735	1.24612	1.22061	1.11653	0.736984	0.991903	0.694404	0.679594	0.622317	0.487092	0.702431	0.595534
MAL6P1.296	0.965	1.18789	1.58459	1.89499	1.74627	1.59047	1.568	1.75963	1.87278	2.07792	1.986	1.80307	2.42915	1.592	2.07001	1.6085	2.02329	1.746	1.77985	1.985	1.62656	1.53022	1.43263	1.00682	0.866401	1.016	0.742221	0.621248	0.59	0.482213	0.426769	0.299396	0.312597	0.261797	0.315218	0.280171	0.236795	0.29049	0.251348	0.312821	0.517161	0.541305	0.811767	1.19309	1.24625	1.04332
MAL6P1.298	1.084	1.08445	1.1394	2.1695	1.27865	1.3254	1.331	1.46478	2.13437	1.53224	1.548	1.38231	1.48653	1.409	1.47401	1.30362	1.301	1.238	1.65401	1.467	1.46864	1.15327	1.60133	1.36829	1.06968	1.05	0.958563	0.945947	0.904	0.930574	0.907001	0.681044	0.58672	0.562379	0.550895	0.511815	0.497139	0.390906	0.33551	0.517458	0.716256	0.61901	0.853102	0.945532	0.893774	0.964902
MAL6P1.299	1.363	1.34713	0.788944	0.852619	0.552865	0.511133	0.391	0.414448	0.369611	0.286716	0.227	0.17166	0.207887	0.132	0.138057	0.0712554	0.0800109	0.098	0.0551062	0.081	0.0752436	0.0823099	0.242681	0.24071	0.372134	0.523	0.677318	1.06679	1.441	1.60236	1.63016	1.99378	2.25454	3.01336	2.93614	2.2432	2.70548	3.1141	2.70455	3.55443	2.1427	1.93869	1.77739	1.56213	1.8593	1.3911
MAL6P1.300	1.031	1.35294	0.754569	0.929785	0.568696	0.566939	0.616	0.748375	0.81861	0.921807	0.76	0.68793	0.788832	0.569	0.672605	0.523318	0.591862	0.653	0.567511	0.587	0.473756	0.57804	0.674816	0.61417	0.621317	0.677	0.768847	0.912598	1.107	1.15776	1.19589	1.55456	1.82556	2.26244	1.8265	1.71582	1.68112	2.08603	1.46032	1.62015	1.15815	1.28017	1.32156	1.06358	1.29157	1.10924
MAL6P1.304	0.91	0.936832	1.06646	1.22327	1.31031	1.44969	1.307	1.344	1.7049	1.84978	1.678	1.5359	2.37219	1.654	1.91512	1.67509	1.72517	1.871	1.56929	1.697	1.32373	1.59382	1.68975	1.29072	1.20247	1.584	1.21817	1.10713	1.044	1.08178	0.863855	0.664594	0.601147	0.578539	0.500814	0.478854	0.332298	0.384929	0.345746	0.500514	0.535371	0.587401	0.768136	0.788516	0.895033	0.8808
MAL6P1.305	0.728	0.804327	0.524006	0.570521	0.563825	0.660795	0.398	0.576675	0.532292	0.450113	0.469	0.342029	0.51687	0.499	0.509294	0.407674	0.598438	0.533	0.592186	0.947	0.853689	0.988654	1.49849	1.43946	1.44264	1.678	1.57597	1.81982	2.166	1.14272	1.63954	1.58581	1.41871	1.37255	1.35023	0.949467	0.829437	0.866688	0.628938	0.737736	0.786667	0.723057	0.802582	1.07848	1.04609	0.787606
MAL6P1.306	0.878	0.729938	0.902968	0.683107	0.677077	0.712796	0.691	0.841922	0.80039	0.907934	1.215	0.867334	1.07218	1.055	1.68362	1.28727	1.30319	1.623	1.5183	2.379	1.70459	1.35531	1.90175	1.6042	1.63198	1.773	1.45532	1.56612	1.527	1.4662	1.10209	1.01745	1.00897	0.953458	0.965294	0.792901	0.515455	0.926459	0.442418	0.556561	0.619622	0.762568	0.990884	0.6919	0.70369	0.844431
MAL6P1.307	1.192	1.16348	1.03544	0.912074	0.993695	1.06285	0.68	0.825344	0.766552	1.04204	0.913	0.826032	1.14195	0.93	1.33174	0.968372	1.20236	1.403	1.21974	1.318	0.918715	1.5405	1.05463	1.09399	0.954926	1.109	1.22733	0.97804	0.837	1.12918	0.754114	0.73204	0.934905	1.41564	1.38362	1.30197	1.14734	1.1512	1.12367	1.37902	1.33539	1.60021	1.14933	1.07275	1.03476	1.12288
MAL6P1.313	0.855	0.799678	0.826672	1.18532	0.985171	1.13515	0.983	1.37123	1.86237	1.68638	1.411	1.7295	1.76846	1.27	1.52115	1.39123	1.45006	1.303	1.23783	1.249	1.26521	0.97556	0.976137	0.914057	0.903286	0.851	0.826261	0.801437	0.825	0.736485	0.899497	0.759183	0.63385	0.680888	0.589193	0.517308	0.629274	0.530771	0.45834	0.59045	0.545083	0.592669	0.678578	0.612017	0.684807	0.72737
MAL6P1.33	1.519	1.4994	1.85875	1.66096	1.20315	1.65262	1.375	1.71818	1.26371	1.73109	1.532	1.15774	1.34272	1.129	1.15665	0.995239	0.933826	1.133	0.84222	0.895	0.698558	0.822164	1.06726	0.93405	0.966402	1.113	0.978533	1.06679	1.327	1.07426	1.07396	1.18771	1.38985	1.35962	1.39246	1.33585	1.12118	1.18706	0.752907	1.00363	0.916565	1.17085	0.995477	1.42804	1.42626	1.45815
MAL6P1.34	0.71	0.616612	0.849729	0.511698	0.534598	0.537134	0.3695	0.479576	0.400846	0.42622	0.5025	0.353	0.42147	0.4285	0.429323	0.374967	0.60611	0.63	0.675256	0.908	0.948905	1.15421	1.58419	1.74055	1.94018	1.754	1.84598	1.77365	1.6815	1.62606	1.6522	1.38183	1.46872	1.31814	1.16906	0.761313	0.747017	0.671832	0.487342	0.563078	0.818838	0.761251	0.686615	0.748976	0.801879	0.698957
MAL6P1.35	0.462	0.294067	0.403275	0.256798	0.25573	0.275226	0.172	0.285377	0.347486	0.272843	0.539	0.322669	0.412926	0.448	0.597684	0.603919	0.834086	1.045	1.1926	1.669	1.34138	2.54693	2.86797	1.95527	2.38691	2.078	1.92545	1.90946	1.741	1.30897	1.44539	0.8365	0.844492	0.726137	0.609815	0.639082	0.599184	0.450677	0.368492	0.246347	0.451605	0.449112	0.470756	0.414888	0.396534	0.413692
MAL6P1.36	0.562	0.634628	0.778044	0.862739	0.886532	1.08061	0.938	1.38544	1.36262	1.63397	1.459	1.52687	1.90943	1.594	1.47653	1.43796	1.40512	1.479	1.93612	1.63	1.70088	1.61346	1.37309	1.56261	1.40001	1.055	0.937761	0.840881	0.771	0.592047	0.602166	0.425241	0.480918	0.434174	0.415381	0.439483	0.567785	0.417205	0.302527	0.464018	0.395762	0.475453	0.404162	0.569611	0.47584	0.483019
MAL6P1.37	0.68	0.698556	1.18635	0.796958	1.03753	1.27974	0.917	1.6874	0.705384	1.8282	1.244	1.46879	2.29815	1.428	0.906628	1.4438	1.60351	0.974	1.2743	1.228	1.60613	1.461	1.28197	1.31791	1.59592	1.08	1.31553	1.01211	0.938	0.513057	0.602166	0.4968	0.664629	0.5376	0.525364	0.600627	0.583484	0.58337	0.534541	0.629552	0.670124	0.812616	0.688912	1.00054	0.905104	1.12174
MAL6P1.38	0.701	0.459117	0.631323	0.621121	0.353152	0.313275	0.257	0.221434	0.213437	0.15569	0.275	0.0838939	0.126726	0.221556	0.184356	0.226265	0.285628	0.534	0.681836	0.509	0.4784	0.485441	0.924714	0.953242	1.08034	1.934	1.63755	1.91395	1.943	2.16432	2.19762	2.19612	1.7313	1.5654	1.51717	1.05568	0.960264	0.872665	0.542502	0.774232	0.637346	0.424088	0.725654	0.680783	0.751526	0.512569
MAL6P1.39	1.05	1.17511	1.22072	1.16634	1.44427	1.51057	1.094	1.40557	1.0815	1.19157	1.402	0.986076	1.2758	1.082	1.12213	0.531495	0.754076	0.95	0.947497	0.657	0.833253	0.720212	1.11958	0.886867	0.880335	0.891	0.90947	1.39758	0.961	0.638688	0.683768	0.968103	0.637697	0.823098	0.758095	0.860655	0.747017	0.653901	0.418534	0.724702	1.0756	1.19983	0.904771	1.25016	1.71328	0.8808
MAL6P1.41	0.8665	0.650319	0.805293	0.604676	0.500501	0.440742	0.501	0.40912	0.357247	0.422367	0.283	0.302018	0.204327	0.5075	0.350613	0.0841047	0.141694	0.4055	0.11097	0.2245	0.193218	0.179585	0.346881	0.414245	0.58689	0.786	1.04094	1.42582	1.6275	1.79871	2.10946	2.02257	2.6287	3.56335	3.60537	2.75226	2.0278	1.80092	1.42506	1.18937	1.02097	1.01807	0.958161	0.845248	0.927133	0.787606
MAL6P1.44	0.781	0.714828	0.604494	0.593291	0.515114	0.473084	0.314	0.304323	0.200423	0.195768	0.157	0.117451	0.138117	0.114	0.138057	0.0549017	0.0745307	0.152	0.0690883	0.072	0.0575939	0.0804392	0.180432	0.297488	0.474594	0.727	0.854552	1.36621	1.479	1.98603	1.71176	2.12538	3.06729	3.69963	3.74039	3.56073	1.83941	2.32511	1.20101	1.38163	1.12294	1.05627	0.917401	0.908856	0.843421	0.947854
MAL6P1.48	1.0005	1.45406	1.43494	0.897527	1.92285	1.73062	1.02	1.99231	0.477631	2.03091	0.9795	1.48944	2.53024	1.092	0.657032	1.12373	1.37279	0.997	0.718848	0.8915	0.727355	1.60551	0.817808	1.11998	1.2869	0.752	1.26269	1.07755	0.773	0.605964	0.404727	0.445804	0.785339	0.81448	0.819469	0.75994	0.434997	0.815284	0.688648	1.07141	1.26802	1.85901	1.29917	1.50941	1.86937	1.48713
MAL6P1.49	0.7135	0.641021	0.598122	0.576846	0.472492	0.488304	0.436	0.543519	0.367008	0.497129	0.622	0.418179	0.622237	0.7815	0.937354	0.710802	1.16531	1.137	1.80164	1.662	1.62935	1.82625	2.03798	2.25835	1.68485	1.8685	1.56765	1.60512	1.51	0.966684	0.831495	0.685568	0.766583	0.658802	0.828307	0.642744	0.648243	0.649119	0.540227	0.740343	0.98819	0.791543	0.952994	1.0441	1.4678	0.897279
MAL6P1.54	1.289	1.76324	1.67934	1.60024	0.903581	1.95321	1.855	3.02784	2.49748	3.59012	2.883	1.51525	1.67734	1.424	1.33595	1.2277	1.06974	1.065	1.39904	1.617	0.965161	0.983978	0.907573	0.866075	1.00821	0.927	0.460144	0.373825	0.409	0.38216	0.650939	0.73862	0.709835	0.699203	0.649094	0.614361	0.676371	0.728018	0.420809	0.706454	1.12416	1.17349	1.54201	1.5289	1.96127	1.21039
MAL6P1.56	0.568	0.457955	0.465318	0.388359	0.239899	0.21181	0.131	0.161043	0.119733	0.134109	0.342	0.0735685	0.168018	0.185	0.113644	0.178723	0.344157	0.55	0.375873	0.894	0.719923	0.761367	1.35324	1.31711	1.80575	2.035	1.9138	1.92112	2.595	1.82353	2.12728	1.41062	1.67167	1.50722	1.41112	1.25894	0.996895	0.930045	0.618703	0.662138	0.601169	0.417503	0.328381	0.53179	0.673478	0.917168
MAL6P1.57	0.587	0.560239	0.472863	0.521185	0.49563	0.391911	0.262	0.331559	0.22515	0.279009	0.252	0.219415	0.29332	0.286	0.573272	0.2675	0.317852	0.664	0.448252	0.623	0.612167	0.767914	1.27656	1.02681	1.16476	1.632	1.75404	1.90319	1.94	1.96271	1.81213	1.72893	1.89963	1.4652	1.34336	1.20583	0.956339	0.985035	0.61984	0.728612	0.75996	0.737544	0.699245	0.896249	0.88748	0.721688
MAL6P1.58	0.645	0.633466	0.762953	0.576846	0.428653	0.572013	0.405	0.449972	0.435985	0.431616	0.403	0.335575	0.427165	0.266	0.340933	0.398329	0.563365	0.367	0.338039	0.598	0.749649	0.665962	0.931029	1.20515	1.34099	1.705	1.92212	1.94443	2.006	2.19441	2.13666	1.88932	1.79382	1.64081	1.55645	1.08497	0.736551	0.847561	0.467439	0.712971	0.615495	0.645351	0.951846	1.20455	0.902586	0.856933
MAL6P1.59	0.914	0.871741	1.21821	0.791898	0.940114	1.02227	0.984	1.20664	0.860256	1.35805	1.113	1.19387	1.28719	1.064	1.02448	0.87025	0.948075	0.968	0.970526	1.019	0.758009	0.911021	1.0853	0.843684	1.07952	0.89	0.756366	1.01677	0.688	0.855346	0.637808	0.764941	0.881042	0.932989	1.07135	1.01814	0.868685	1.00536	0.860952	1.01145	1.00761	1.1129	1.59713	1.31458	1.78503	1.09674
MAL6P1.60	1.84	1.40757	1.04047	0.713467	1.01683	0.887825	0.545	0.555361	0.490646	0.698292	0.815	0.527886	0.721909	0.803	0.796351	0.183395	0.707189	0.726	0.493488	0.432	0.612167	0.445222	0.5431	0.487017	0.498365	0.596	0.774672	0.819366	0.901	0.837291	1.30844	0.894899	1.01858	1.17001	0.995736	0.905519	1.02306	1.3592	1.4353	1.26301	1.03796	1.34733	1.22397	1.66414	1.60753	0.926261
MAL6P1.61	0.589	0.536993	0.612878	0.366854	0.407951	0.38557	0.401	0.492601	0.273304	0.417742	0.342	0.406563	0.56101	0.416	0.602735	0.575884	0.723386	0.888	0.866894	1.033	0.897349	1.31041	1.64734	1.47145	1.67542	1.559	2.15094	1.66563	1.667	1.40677	0.936077	0.722992	0.942599	0.996552	0.911285	0.62077	0.433034	0.572611	0.658509	0.69342	0.898355	1.06549	0.969069	1.35698	1.32807	1.13311
MAL6P1.63	2.439	2.55478	2.5496	2.3934	2.46475	2.81314	1.898	2.84075	1.72051	2.97352	1.768	2.09347	2.5516	1.24	1.21305	1.18798	1.06206	0.955	0.71638	0.499	0.4784	0.49386	0.407776	0.358266	0.336888	0.277	0.277085	0.244734	0.295	0.24374	0.344229	0.374245	0.533819	0.646412	0.80032	0.817622	0.873918	1.16435	1.21807	1.5615	2.16698	2.78555	2.21141	3.46351	3.4895	2.69582
MAL6P1.64	1.785	1.83414	2.174	1.63566	2.1664	2.23605	1.438	1.81765	1.19603	2.0733	1.364	1.90116	2.19421	1.239	1.29134	1.27792	1.54322	1.277	1.05935	1.215	1.06177	1.34782	1.18003	1.02681	1.01804	0.933	0.986854	0.721652	0.701	0.666523	0.525254	0.474592	0.483804	0.581771	0.614724	0.573159	0.582176	0.695741	0.73016	0.999724	1.15208	1.50406	1.2676	1.46701	1.44892	1.51498
MAL6P1.65	1.584	1.93294	1.37332	2.16317	1.27865	0.948704	0.866	0.843106	1.14137	0.869397	0.912	0.533049	0.704823	0.499	0.591792	0.58406	0.766132	0.633	0.601233	0.564	0.589872	0.78475	0.700978	0.562189	0.590169	0.732	0.733068	0.855225	1.021	1.03213	1.61422	1.59157	1.56875	1.83581	1.63599	1.37888	2.15863	2.15775	1.8254	1.6397	1.63403	1.39607	1.52249	1.24237	1.59746	1.29336
MAL6P1.68	1.4255	1.67374	2.16226	2.69448	2.37038	2.47323	2.121	2.51333	2.30551	2.79779	1.986	1.75532	2.29245	1.5085	1.39067	1.23996	1.26368	1.1225	0.926113	0.9465	0.841613	0.981172	0.73932	0.816894	0.76722	0.77	0.735148	0.673691	0.67	0.638688	0.567931	0.553143	0.474185	0.454105	0.468408	0.424834	0.392478	0.468011	0.384414	0.626294	0.903818	0.902833	1.22397	1.59079	1.55089	1.56669
MAL6P1.70	0.8626	0.924278	1.01364	1.34091	1.04971	1.20313	1.0582	1.48633	1.27464	1.62534	1.2216	1.20291	1.61725	1.027	1.07802	0.918143	0.947636	1.058	0.814584	0.876	0.789221	0.765108	1.00573	0.908299	1.01296	1.0544	1.12648	1.23407	1.2356	1.30521	1.03175	1.11566	1.1567	1.22754	1.23102	1.0066	0.703844	0.817197	0.518163	0.649364	0.642688	0.635868	0.836109	0.999398	0.979627	0.996497
MAL6P1.72	0.912	1.05539	1.02454	1.46362	0.899928	1.00832	1.261	1.49675	2.56776	1.98851	2.003	1.68304	1.69442	1.612	1.70803	1.49636	1.41608	1.623	1.83907	1.834	1.56061	1.42826	1.3767	1.37788	1.10903	1.304	0.973541	0.745856	0.857	0.677055	0.886366	0.736975	0.642506	0.454643	0.46939	0.326866	0.378087	0.344284	0.259309	0.318035	0.42854	0.453063	0.59476	0.576488	0.555147	0.703503
MAL6P1.73	0.81	0.994948	1.03124	1.23592	1.09721	1.34569	1.041	1.40084	1.25199	1.88832	1.374	1.49589	2.46901	1.361	1.72992	1.54309	1.55199	1.565	1.50267	1.527	1.37203	1.23839	1.3785	1.12598	1.12952	1.173	1.00017	0.984315	0.879	0.835786	0.618111	0.497623	0.533819	0.412627	0.488048	0.471529	0.380704	0.462632	0.316175	0.434039	0.532943	0.565011	0.871473	1.15871	1.2966	1.00582
MAL6P1.75	0.399	0.39054	0.343748	0.275773	0.264255	0.266347	0.196	0.195383	0.158777	0.138734	0.351	0.120033	0.12815	0.417	0.473938	0.198581	0.398959	0.638	0.583961	1.103	0.805385	1.56202	2.047	1.80092	2.36805	1.908	2.22666	2.43389	2.219	1.64374	1.24654	1.00018	1.05225	0.950226	0.832726	0.687608	0.431726	0.671832	0.439006	0.513548	0.615495	0.422771	0.46846	0.616601	0.547594	0.471654
MAL6P1.76	0.553	0.539317	0.496255	0.44655	0.448137	0.402058	0.51	0.261694	0.255084	0.299048	0.574	0.234903	0.37021	0.836	0.931883	0.642467	1.00397	1.038	1.17615	1.707	1.78076	1.94831	2.74888	2.00813	2.27215	2.07	2.15261	1.87719	1.501	0.917785	0.842282	0.788794	0.72811	0.635639	0.752203	0.706835	0.63189	0.500886	0.467439	0.642587	0.792737	0.755983	0.861139	0.859574	0.701172	0.568258
MAL6P1.80	0.7945	0.782824	0.682047	0.649584	0.57722	0.462303	0.3465	0.455301	0.309744	0.316004	0.2	0.208444	0.304711	0.236	0.213819	0.199749	0.204959	0.228	0.113091	0.116	0.151881	0.143575	0.287789	0.469824	0.733613	0.8885	1.21027	1.54774	1.8245	2.00784	1.73943	2.05835	2.9211	2.91801	3.28131	2.63553	1.31873	1.53194	0.805792	1.01862	0.909888	0.939052	0.937494	0.863013	0.927763	0.939899
MAL6P1.81	1.168	1.0519	0.813258	0.857679	0.709956	0.618941	0.57	0.483128	0.430779	0.499595	0.472	0.392365	0.590912	0.733	0.881374	0.699704	1.06425	1.134	1.34887	1.223	1.24198	1.32257	2.13	1.82012	1.58116	1.239	1.37294	1.28553	1.091	0.879419	0.943581	0.822517	0.845454	1.00733	1.04876	0.976019	1.2991	1.04122	0.966723	1.24086	1.02582	1.0971	0.820953	0.937509	0.912657	0.853523
MAL6P1.82	0.943	0.84617	1.07149	0.888039	1.04606	1.07807	0.908	1.18177	0.916219	1.27635	1.003	1.00156	1.39968	0.982	0.992493	0.898285	1.13659	0.919	0.959012	1.005	1.14073	0.984913	1.6708	1.25073	1.06312	1.209	1.04593	1.37069	1.089	0.936592	0.651877	0.569182	0.719453	0.759535	0.708013	0.69127	0.63974	0.81887	0.760868	0.951497	0.980906	1.0589	0.989736	1.06931	1.08638	1.00695
MAL6P1.83	0.4	0.491662	0.483763	0.556606	0.459097	0.715333	0.595	0.751928	0.9891	1.13762	1.226	1.15774	1.43812	1.115	1.40498	1.12373	1.34155	1.656	1.19095	1.606	1.45099	1.3815	1.79259	1.41307	1.43936	1.678	1.49276	1.36083	1.694	1.23751	1.13305	0.822517	0.912782	0.837104	0.725689	0.594218	0.382012	0.540335	0.425358	0.500514	0.484383	0.557109	0.529314	0.788516	0.619348	0.643268
MAL6P1.84	0.389	0.480039	0.441842	0.404804	0.46275	0.52128	0.395	0.421553	0.32406	0.474777	0.533	0.485294	0.713366	0.559	0.760995	0.64013	0.888888	0.906	0.901438	1.08	1.03576	1.39272	1.57968	1.51943	1.75493	1.767	2.03695	1.71672	1.919	1.58506	1.07114	0.965635	1.07918	0.837104	0.80523	0.69768	0.419952	0.548703	0.482224	0.39624	0.494095	0.412234	0.489127	0.532936	0.524935	0.409146
MAL6P1.88	0.539	0.532343	0.571796	0.743828	0.524856	0.540305	0.511	0.635882	0.895396	0.826235	0.768	0.779568	1.05225	0.774	0.969764	0.897117	0.930538	1.118	0.939272	1.198	1.06084	1.16637	1.42451	1.13557	1.31968	1.557	1.56432	1.56881	1.671	1.59634	1.78492	1.38265	1.24173	1.25943	1.11456	0.833187	0.613574	0.570221	0.473126	0.59436	0.565721	0.566329	0.539647	0.642962	0.62816	0.620538
MAL6P1.90	0.608	0.717153	0.811581	1.11827	0.918194	0.749578	1.175	1.25045	1.93525	1.72955	1.947	1.77468	2.13298	1.798	2.13483	2.02319	1.87313	2.269	2.42056	1.784	1.95726	1.61814	1.79891	1.24913	0.998369	1.287	1.07506	0.784404	0.752	0.668403	0.697837	0.403856	0.352994	0.373842	0.413417	0.360742	0.320524	0.325157	0.300253	0.321945	0.417614	0.404332	0.446644	0.456147	0.498499	0.584169
MAL6P1.91	0.262	0.201082	0.19535	0.193547	0.165616	0.114149	0.175	0.259326	0.547909	0.82007	0.882	1.6753	2.29957	1.985	2.36633	2.52081	2.90012	2.214	2.84002	2.618	2.86111	1.85384	2.24999	1.39948	1.33362	1.255	1.35464	1.03272	1.088	0.870391	1.07489	0.73862	0.592491	0.586081	0.526346	0.423918	0.378087	0.307226	0.235425	0.302394	0.223375	0.208093	0.228489	0.214321	0.265615	0.295494
MAL6P1.93	0.9208	0.907541	1.10435	1.09145	1.10695	1.16812	0.967	1.245	0.957084	1.5051	1.2258	1.32733	1.6705	1.244	1.44286	1.24195	1.41849	1.3908	1.2565	1.2146	1.12252	1.12035	1.24877	1.11654	1.16132	1.1868	1.18156	1.08848	1.0526	1.13008	0.691084	0.772343	0.869692	0.946132	1.01891	0.880248	0.743092	0.824608	0.590725	0.685599	0.719169	0.647195	0.81039	0.935904	0.868094	0.942399
MAL6P1.95	1.361	1.71791	1.77408	1.74825	1.35659	2.16376	1.498	1.66727	1.95477	1.98543	3.087	1.36037	1.47087	1.62	2.01613	1.32114	1.63529	1.944	1.87772	2.966	1.45935	1.87629	0.88953	1.20755	1.14181	1.019	0.703113	0.702826	0.614	0.541644	0.709092	0.857885	0.955103	0.673346	0.781662	0.753531	0.890926	1.05557	0.498147	0.705151	0.730824	0.867931	1.21823	0.953554	1.43507	1.73887
MAL6P1.97	0.589	0.549778	0.78056	0.551546	0.57722	0.579623	0.745	0.821792	0.771758	1.10062	1.462	1.18871	1.42388	1.347	1.84777	1.14826	1.3021	1.942	1.61206	2.195	1.33209	1.11867	1.95769	1.41947	1.37542	1.381	1.2448	1.09727	1.045	0.768833	0.525254	0.505025	0.462643	0.404008	0.578391	0.500828	0.245953	0.534358	0.390101	0.363654	0.715042	0.943003	0.741728	0.796539	0.575288	1.32859
MAL7P1.102	0.5775	0.575349	0.566346	0.430104	0.330623	0.287909	0.2065	0.256958	0.147714	0.223515	0.1195	0.143265	0.218566	0.162	0.210873	0.184563	0.299219	0.2705	0.501302	0.564	0.647466	0.752481	1.17597	1.17796	1.48198	1.434	1.53478	1.81847	2.092	1.7374	1.5556	1.71988	1.99821	1.71676	1.98558	1.62288	0.976617	1.05317	0.65794	0.784008	0.655556	0.657863	0.78823	0.697974	0.775444	0.822838
MAL7P1.104	0.768	0.847333	1.11844	1.1714	1.05702	1.2772	1.069	1.1344	1.50187	1.29793	1.37	1.22743	1.55488	1.228	1.43781	1.01159	1.24729	1.158	1.21892	1.408	1.37203	1.14953	1.40647	1.05241	1.06394	1.132	1.02929	1.06231	1.048	0.848575	0.823523	0.700784	0.694446	0.552683	0.6815	0.495334	0.521996	0.548703	0.439006	0.514851	0.585145	0.655887	0.678578	0.921464	0.964269	0.90694
MAL7P1.105	1.627	1.49707	2.18238	1.59771	2.08725	1.87965	1.11	2.11605	1.57996	2.41088	1.775	1.79017	1.92509	1.202	1.15075	0.995239	0.936018	1.052	0.792871	0.99	0.891776	0.699634	1.0005	0.643759	0.507381	0.555	0.524214	0.705316	0.6815	0.43181	0.426769	0.509961	0.393391	0.56992	0.633382	0.641829	0.622732	0.737581	0.782477	0.869382	1.06103	1.21563	1.4892	1.29395	1.42374	1.14674
MAL7P1.111	0.681	0.632303	0.536582	0.44908	0.426217	0.372886	0.286	0.335111	0.226452	0.209642	0.225	0.183276	0.270538	0.317	0.506769	0.365622	0.492122	0.846	0.930225	1.219	0.933578	1.45632	1.99107	2.15679	2.22051	2.016	1.72075	1.72928	1.657	1.92961	1.5223	1.63928	1.5072	1.17324	0.910303	0.817622	0.627965	0.681396	0.4754	0.507031	0.413972	0.499159	0.461571	0.391966	0.326039	0.356866
MAL7P1.112	1.172	1.62958	1.79084	2.44401	1.34928	1.125	1.486	1.4411	1.47714	1.73263	1.647	1.25066	1.30855	1.106	1.15244	0.893613	0.891081	0.998	0.852089	0.895	0.605664	1.00736	0.860661	0.910858	0.886073	1.119	0.856217	0.900944	1.09	0.925308	0.901373	0.910526	1.11477	1.17324	1.21374	0.824947	0.893542	0.926459	0.607329	0.728612	0.69926	0.894272	1.09078	1.23206	1.55215	1.09901
MAL7P1.113	1.1165	1.25124	1.72545	1.90258	1.88997	2.01663	1.6535	2.09356	1.80641	2.65906	2.143	2.25868	2.91042	1.83	1.9812	1.73349	1.9926	1.903	1.76586	1.47	1.34835	1.12241	1.2531	0.964038	0.907795	0.8235	0.750542	0.582252	0.5385	0.408866	0.329222	0.30063	0.276047	0.276341	0.35057	0.304434	0.298938	0.33233	0.338922	0.437949	0.619743	0.657863	0.831861	1.12891	1.19023	1.15697
MAL7P1.114	0.43	0.530019	0.43765	0.52498	0.421346	0.279031	0.259	0.316165	0.312347	0.396161	0.391	0.418179	0.565282	0.555	0.596001	0.607423	0.765036	0.913	0.963947	1.172	1.07849	1.33567	1.73485	1.52183	1.68772	1.753	1.8647	1.76155	2.13	1.53616	1.94062	1.22473	1.23307	1.21741	1.19017	0.919252	0.652822	0.614452	0.459478	0.477052	0.490453	0.580816	0.45583	0.479069	0.5627	0.45006
MAL7P1.118	0.878	1.00425	0.963333	1.54585	1.61476	1.11105	1.037	1.32268	1.49146	1.40583	1.221	1.2184	1.2402	1.094	0.884741	0.892444	0.877928	0.859	0.959012	0.984	0.877842	1.027	0.991474	1.12758	0.886073	1.161	1.17241	1.25236	1.143	0.943363	1.285	1.0668	0.978187	1.0892	1.05171	0.806635	0.599184	0.755512	0.491323	0.512244	0.677408	0.816567	0.893289	0.755279	0.954198	0.912622
MAL7P1.119	1.18633	1.28204	0.617349	0.730334	0.816714	0.596534	0.378	0.48826	0.249444	0.288258	0.180667	0.175102	0.171341	0.0803333	0.0782882	0.0541229	0.055898	0.0693333	0.0408498	0.0446667	0.0294162	0.0427139	0.0357857	0.0650423	0.138253	0.201667	0.457647	0.809804	1.04667	1.22748	1.76335	1.77225	2.92687	3.95461	4.26085	3.84731	3.77651	4.04335	2.99305	2.88708	1.60854	2.04756	1.29745	1.57894	1.59495	1.30624
MAL7P1.12	1.127	1.27274	1.50998	1.46236	1.35659	1.50042	1.23	1.59622	1.23377	2.15654	1.644	1.6198	1.83823	1.451	1.639	1.55827	1.82491	1.634	1.81933	1.802	1.31537	1.5405	1.45518	1.3259	1.19673	1.082	1.21069	0.918874	0.877	0.885437	0.552454	0.679399	0.610766	0.51713	0.664806	0.476107	0.340148	0.33233	0.359393	0.497907	0.677408	0.750714	0.942661	0.985645	1.11029	1.16152
MAL7P1.120	1.14	1.56913	1.34313	1.95445	1.32006	1.72872	1.378	1.717	1.57085	2.13341	1.81	1.37586	1.83681	1.294	1.31996	1.35619	1.34155	0.93	1.13091	1.092	1.05898	1.17666	1.18905	1.08679	0.99509	0.983	0.795474	0.823849	0.781	0.712412	0.544951	0.556021	0.601147	0.49666	0.605887	0.494419	0.456583	0.58337	0.449242	0.632159	0.922635	0.887687	1.28252	1.32604	1.71705	1.16948
MAL7P1.122	0.926	0.836872	1.13688	1.23212	1.00953	1.22647	1.024	1.33571	1.73873	1.54303	1.36	1.45975	1.89661	1.343	1.52452	1.3959	1.37991	1.364	1.31186	1.481	1.48165	1.07845	1.54269	1.12438	1.13034	1.296	0.972709	1.15644	1.073	0.977216	0.830088	0.592212	0.554979	0.489119	0.48903	0.454133	0.570402	0.48415	0.491323	0.762501	0.67498	0.65457	0.822101	0.950116	0.97434	0.789879
MAL7P1.125	1.411	1.11234	0.639707	0.913339	0.809813	0.616404	0.535	0.567202	0.490646	0.456279	0.486	0.38204	0.474153	0.411	0.427639	0.258155	0.318948	0.33	0.245099	0.326	0.264746	0.269378	0.39695	0.302287	0.370495	0.523	0.579132	0.974454	1.058	1.35862	1.62453	1.51672	1.76785	2.10838	1.81962	1.54185	2.54849	2.33826	1.86179	2.41785	2.02615	1.7543	1.65454	1.5438	1.79007	1.07742
MAL7P1.126	0.606	0.571862	0.658152	0.862739	0.847564	0.913191	1.075	1.25519	1.48235	1.7203	1.431	1.4533	1.79979	1.313	1.58344	1.18447	1.30648	1.347	1.09308	1.099	0.960517	1.04665	1.21792	1.08839	1.05739	1.209	1.23482	1.09099	1.155	1.26835	0.890117	0.900656	0.946447	0.842491	0.887717	0.704089	0.544237	0.461436	0.435594	0.500514	0.429754	0.499159	0.489127	0.566173	0.526194	0.65577
MAL7P1.127	1.094	1.36922	0.850986	0.881714	1.15079	0.909386	0.504	0.916523	0.766552	0.804655	0.795	0.55499	0.596607	0.412	0.531181	0.564202	0.523907	0.474	0.71638	0.853	0.598233	0.735177	0.929225	1.18516	1.53444	1.627	1.49027	1.47827	1.44	1.53992	1.64986	1.62858	1.79575	1.76471	1.49851	0.956792	0.575635	0.925264	0.542502	0.68951	0.974836	1.17612	1.02648	1.19309	1.17198	0.93308
MAL7P1.128	1.021	0.653225	1.22156	0.642627	0.5553	0.801579	0.847	0.562466	0.37742	0.533353	1.244	0.424632	0.59376	0.937	1.1457	0.469585	0.417591	0.842	0.833172	0.768	0.718994	0.888573	0.62249	0.907659	1.09263	1.008	0.837911	1.50857	1.101	1.24051	1.3741	0.945072	1.31002	1.15061	1.28739	0.710498	0.682912	0.769858	0.409436	0.583933	0.797593	0.858712	0.756655	1.30655	0.852233	0.893302
MAL7P1.129	0.405	0.703205	0.809066	0.747623	0.972993	0.923338	0.566	1.12848	0.295428	1.27172	0.709	0.893147	1.71436	0.785	0.477306	0.902958	1.70434	0.885	0.898971	1.369	1.10357	2.16251	1.67802	1.82092	2.25985	1.46	1.87053	1.7472	1.375	0.844814	0.725976	0.663771	0.965683	0.795087	0.771843	0.591471	0.283893	0.504472	0.282056	0.409274	0.469815	0.740178	0.621169	0.9547	0.877409	0.82852
MAL7P1.13	0.88	0.908936	0.658152	0.713467	0.63202	0.481962	0.407	0.509179	0.408654	0.331419	0.246	0.340738	0.323222	0.189	0.258435	0.231288	0.324428	0.315	0.248389	0.357	0.316766	0.42558	0.503405	0.526203	0.686891	0.785	1.08171	1.41013	1.519	1.32552	1.86184	1.5488	2.00639	2.27753	2.81634	2.48949	2.49224	2.06451	1.51605	1.45722	1.10838	1.25251	1.0437	1.07963	1.17072	0.941035
MAL7P1.130	2.272	2.07242	1.39344	0.899424	1.13861	1.02227	0.441	0.92718	0.645518	0.810821	0.662	0.619524	0.562434	0.487	0.878007	0.476593	0.438416	0.8808	0.996846	0.7638	0.702273	0.955917	1.0438	1.01642	1.04181	0.989	0.510901	0.978937	1.065	0.790649	0.995168	0.840612	1.59569	1.42749	1.30703	1.28549	0.65413	2.01191	1.96074	1.97077	2.96336	2.43916	1.65913	1.53119	1.10148	0.977404
MAL7P1.131	3.501	3.07085	2.21609	2.7552	3.0164	2.64445	1.709	1.69332	1.74134	1.56615	1.729	1.41845	1.03944	1.027	1.08762	0.797827	0.88012	1.179	1.39164	1.556	1.34602	1.12521	1.43534	0.95964	0.925418	0.923	0.694792	0.641867	0.771	0.637184	0.621863	0.693382	0.650201	0.519285	0.591157	0.625348	0.628358	0.677809	0.528854	0.681689	1.29776	1.24724	1.66487	1.51744	1.77622	1.08196
MAL7P1.132	0.452	0.539317	0.445196	0.389624	0.326361	0.36274	0.203	0.217881	0.160078	0.215808	0.235	0.1523	0.259147	0.179	0.361136	0.233624	0.396766	0.429	0.466346	0.632	0.466324	0.830582	1.10785	1.24593	1.59837	1.662	1.76985	2.17751	2.244	2.16883	1.25029	1.61049	2.01312	1.77117	1.91389	1.53636	0.766641	0.901355	0.500421	0.79639	0.611853	0.666424	0.630354	0.755279	0.64956	0.579623
MAL7P1.134	0.9844	1.34481	1.23045	1.67943	1.09282	1.19248	1.197	1.50054	1.26032	1.80015	1.6026	1.24989	1.56058	1.3196	1.3176	1.22606	1.34396	1.3752	1.48227	1.3276	0.999718	1.25504	1.32076	1.2904	1.19722	1.1554	1.112	1.09619	1.0394	1.02326	0.594662	0.709668	0.722724	0.71407	0.705657	0.576272	0.560459	0.586239	0.378955	0.501817	0.627877	0.681701	0.868258	0.812584	0.807418	0.919669
MAL7P1.137	3.007	2.52108	1.52423	1.40796	0.858524	0.683625	0.521	0.548256	0.560924	0.356083	0.296	0.236194	0.254875	0.162	0.206243	0.147183	0.184135	0.295	0.255791	0.41	0.362284	0.489183	0.5846	0.689341	0.719678	0.948	0.861209	0.933217	1.032	1.16754	1.06739	1.41226	1.67552	1.68714	1.57216	1.3862	1.63794	1.98681	2.22005	3.19729	2.61858	2.61565	2.216	2.00338	1.77622	1.37859
MAL7P1.138	0.856	0.951942	0.930635	1.44844	0.993695	1.0971	0.925	0.962704	1.14527	1.22702	1.225	1.03254	1.46945	1.018	1.23409	1.03496	1.1081	1.284	1.22303	1.114	1.04412	0.931599	1.05553	1.0756	1.06558	1.137	1.07672	1.34021	1.08	1.47147	1.08709	1.11287	1.08976	0.989011	1.10965	0.849668	0.69992	0.863101	0.450379	0.623035	0.688334	0.696716	0.955291	0.653276	0.81195	0.878527
MAL7P1.139	0.81	0.933345	0.82248	1.39531	1.13617	1.46618	1.104	1.26703	1.75305	1.6833	1.397	1.68691	2.04327	1.291	1.64237	1.08518	1.12673	1.312	0.917888	1.185	1.03204	0.955917	1.31535	0.971635	0.960664	1.36	1.1799	1.08203	1.222	1.25105	1.00455	0.928622	0.84353	0.750916	0.771843	0.706835	0.663288	0.650315	0.583446	0.625642	0.63856	0.655887	0.685467	0.877912	0.872374	0.817155
MAL7P1.14	1.763	1.51218	1.6022	1.63946	1.3919	1.46491	1.398	1.82239	1.97039	2.32147	1.573	2.01732	2.28106	1.691	1.69288	2.08159	1.81943	1.815	1.67786	1.558	1.41384	1.67613	0.974333	1.18436	1.09509	0.919	0.671493	0.583597	0.426	0.43482	0.59091	0.393986	0.43475	0.438483	0.463498	0.463289	0.642356	0.792571	0.832519	1.15222	1.36817	1.51592	1.19067	0.71402	1.02469	1.18425
MAL7P1.144	0.668	0.488175	0.523587	0.679312	0.554083	0.511133	0.606	0.728245	1.49146	1.66634	2.034	2.02507	2.73386	2.932	1.84777	3.31396	2.26661	1.741	2.17258	1.847	1.64979	1.04945	1.20258	0.901262	0.540168	0.903	0.540856	0.46885	0.642	0.482213	0.443652	0.540394	0.553056	0.49666	0.694266	0.787407	0.686837	0.652705	0.392376	0.533099	0.824301	0.584767	0.882955	1.45325	0.75782	0.611332
MAL7P1.145	0.908667	0.984487	0.951036	1.32447	1.00871	1.00916	0.924	1.18651	0.839867	1.07185	0.879	0.761068	0.817309	0.708	0.850227	0.574326	0.632415	0.918667	0.864701	0.800333	0.871649	0.812499	0.831491	1.16863	1.21531	1.18567	1.26893	1.38952	1.26533	1.28891	1.22778	0.971118	1.22378	1.27918	1.26676	1.0102	0.836415	0.88701	0.721441	0.724268	0.815399	0.793738	0.984378	1.03837	1.04525	1.07742
MAL7P1.146	0.589333	0.71909	0.826672	0.972373	0.819555	0.971111	0.775333	1.05033	0.734016	1.18592	1.11567	1.08245	1.31947	0.956667	0.952086	0.888161	1.04343	0.991	0.816997	0.915667	0.749959	1.03106	1.14634	1.17183	1.42269	1.363	1.49942	1.51532	1.67367	1.33681	0.77131	1.03034	1.27347	1.26589	1.3319	0.999824	0.535951	0.732002	0.494735	0.612173	0.56653	0.571597	0.724123	0.90198	0.83335	0.850872
MAL7P1.147	0.802	0.910098	1.03594	1.14231	1.15054	1.281	0.908	1.19716	0.876134	1.41508	1.1028	1.10482	1.42388	1.014	1.11759	1.00482	1.08859	1.1952	1.15377	1.04	1.00009	1.16824	1.29496	1.26672	1.40116	1.2468	1.33383	1.25487	1.19	1.2521	0.843783	0.915955	1.02224	0.894204	0.954885	0.718372	0.482748	0.587674	0.414212	0.480441	0.573733	0.565802	0.756884	0.804791	0.821013	0.847159
MAL7P1.15	1.0862	1.41966	1.77844	2.15381	1.89241	1.86215	1.5922	2.16721	1.69006	2.71702	2.5052	2.04959	2.79167	1.9494	2.25622	1.90707	2.14254	2.2574	1.76077	1.6532	1.09391	1.35231	1.23217	0.98587	0.84722	0.8354	0.610751	0.496102	0.4626	0.399161	0.211415	0.304989	0.272777	0.289377	0.354301	0.369166	0.320524	0.423661	0.310034	0.456458	0.689305	0.679594	0.979632	1.29005	1.22888	1.31222
MAL7P1.150	1.324	1.3204	1.97725	2.3934	2.26788	2.31257	2.125	2.38249	2.86058	2.79522	2.40267	2.21351	2.46569	1.89333	1.77257	1.63732	1.81614	1.65567	1.57149	1.69	1.61944	1.22685	1.41669	1.12225	0.83334	0.826	0.712543	0.470941	0.418667	0.264051	0.324219	0.299945	0.236612	0.216907	0.259899	0.203566	0.247436	0.299256	0.302148	0.437515	0.733252	0.679155	0.964859	1.2141	1.35619	1.46345
MAL7P1.151	0.872	1.28843	1.45422	2.01137	1.67564	1.97034	1.873	2.48787	1.83764	2.70222	2.5645	1.97538	2.10592	2.0565	1.68699	1.82168	2.05343	1.787	1.77327	1.466	1.37296	1.61533	1.09703	1.25273	1.14222	1.0415	0.926944	0.840433	0.8315	0.672917	0.669229	0.617299	0.674247	0.567227	0.660878	0.413847	0.313983	0.376561	0.313901	0.349317	0.515947	0.601889	0.772729	0.877912	0.923986	0.86773
MAL7P1.153	0.748	0.557915	1.33056	0.580641	0.311748	0.643039	0.976	0.435763	0.380023	0.283633	0.684	0.180695	0.404383	1.024	0.920939	0.209094	0.584737	1.037	0.766551	0.693	0.716207	0.680928	1.37489	1.19955	1.52624	1.735	1.4886	1.85657	1.949	1.03514	1.4754	1.18936	1.65821	1.32945	1.14303	0.832271	0.981196	1.08665	0.766554	0.732523	1.07074	0.796811	0.89903	1.07046	0.978116	0.745441
MAL7P1.155	0.507333	0.569925	0.60617	0.479862	0.476146	0.591038	0.574667	0.55694	0.655495	0.475291	0.636333	0.506805	0.763202	0.78	0.832268	0.607034	0.751518	0.853	0.679917	0.703	0.586776	0.842118	1.1295	1.13211	1.32679	1.35167	1.69995	1.98238	1.94067	1.60913	1.0924	1.22528	1.51457	1.50901	1.44712	1.00135	0.634071	0.755911	0.528096	0.583498	0.712209	0.703301	0.671689	0.737706	0.737259	0.741387
MAL7P1.16	0.9275	1.03766	1.31798	1.64736	1.33345	1.51945	1.41225	1.90676	1.55067	2.1496	1.87225	1.43459	1.81794	1.51825	1.47716	1.24668	1.3484	1.6505	1.53249	1.53575	1.05504	1.09622	1.53863	1.36009	1.16456	1.41925	1.16492	1.04931	0.88675	0.887882	0.606621	0.624085	0.561231	0.522786	0.56317	0.521886	0.499756	0.545117	0.440712	0.526582	0.708365	0.635473	0.960171	0.915447	0.928707	0.984507
MAL7P1.160	1.042	0.986811	0.848052	0.605941	0.639935	0.62338	0.363	0.426882	0.435334	0.357624	0.442	0.358808	0.51687	0.4705	0.411224	0.436293	0.602274	0.685	0.720904	0.9155	0.887131	1.3525	1.16785	1.3387	1.46845	1.2495	1.46406	1.64456	1.4965	1.20064	1.53684	1.12932	1.47594	1.30252	1.21619	0.964116	0.561244	0.864894	0.788732	0.893495	1.04161	1.17546	0.811767	0.764448	0.71439	0.80579
MAL7P1.162	1.16	1.03447	1.17545	0.699552	0.951074	0.777481	0.617	0.869157	0.48544	0.915641	0.73	0.758917	1.12344	0.705	0.926832	0.747597	0.922866	0.868	0.695818	0.792	0.495121	0.937211	1.00681	0.856479	1.00739	0.941	1.16742	0.964593	1.143	0.816227	0.634994	0.609485	1.04648	1.18509	1.22454	1.34683	0.873918	1.40822	1.40459	1.54455	1.18971	1.37763	1.14359	1.57589	1.25632	0.967175
MAL7P1.164	0.8315	0.929858	1.16539	1.67298	1.00039	1.21125	1.335	1.89817	2.12266	2.03399	1.6605	1.22033	1.32706	1.3475	1.18232	1.11322	1.25825	1.146	1.42083	1.1825	1.23827	1.22015	1.00185	1.28512	1.23075	1.23	1.04676	1.10534	0.9805	1.17394	1.16634	1.03349	0.949813	0.878044	0.898519	0.687608	0.69992	0.60429	0.527148	0.639328	0.752069	0.673009	0.824972	0.797685	0.765373	0.789879
MAL7P1.167	1.025	0.908936	0.471186	0.648952	0.477363	0.485767	0.3235	0.354649	0.257687	0.225827	0.1825	0.169078	0.222838	0.1915	0.262644	0.17113	0.273462	0.4255	0.280054	0.429	0.381791	0.561204	0.713157	0.732125	0.852876	1.14	1.22109	1.47289	1.554	1.68737	1.40177	1.60309	2.16317	2.25167	2.38819	2.02162	1.99641	2.39146	1.96927	2.24579	1.39063	1.39409	1.22684	1.15928	1.28338	0.909781
MAL7P1.17	0.704	0.956978	0.679112	0.591183	0.563825	0.450677	0.374667	0.451551	0.209967	0.383316	0.236333	0.193601	0.221177	0.177	0.169484	0.0658042	0.113879	0.171333	0.115813	0.118	0.0870101	0.15059	0.232156	0.39132	0.681426	0.798333	1.19626	1.51383	1.82667	1.70843	1.07927	1.78377	2.50045	2.98499	3.40946	2.78584	1.65626	1.9629	1.15059	1.15787	0.912113	1.11554	1.10494	1.12356	1.23744	0.991042
MAL7P1.170	2.501	2.45134	2.44145	2.90573	2.0154	2.06356	2.118	2.46656	3.17944	3.09992	2.272	2.5465	2.79508	1.952	2.04475	1.74868	1.53446	1.642	1.05442	0.92	0.646537	0.38536	0.308539	0.228714	0.202461	0.195	0.192212	0.146123	0.118	0.157979	0.136941	0.157101	0.183711	0.312433	0.35548	0.397366	0.626657	0.811698	0.934878	1.42464	1.9084	1.77669	2.23896	2.19478	2.62971	2.25371
MAL7P1.171	0.533	0.696231	0.927281	1.37254	1.52342	1.2049	1.565	3.1948	1.64503	4.74469	2.665	4.32763	4.93803	2.769	2.28551	3.02777	3.23989	1.966	1.78807	1.149	0.947512	0.854901	0.608958	0.539798	0.457381	0.259	0.262939	0.180189	0.136	0.104567	0.078788	0.0575762	0.0817561	0.104503	0.115875	0.108955	0.105969	0.196051	0.199031	0.294573	0.421256	0.493891	0.631502	0.959285	0.756561	1.21153
MAL7P1.172	2.141	2.38044	2.73825	3.89118	3.7495	2.96787	3.169	4.28421	3.54384	4.08647	2.734	3.10149	3.08983	1.781	1.71982	1.48351	1.14865	0.932	0.671144	0.522	0.525776	0.356365	0.329288	0.250306	0.20492	0.197	0.184723	0.140745	0.158	0.137668	0.139755	0.148876	0.175054	0.245637	0.300488	0.260943	0.342764	0.468609	0.568661	0.758591	1.34996	1.23275	1.60976	2.71625	2.61964	2.66058
MAL7P1.175	0.5315	0.495149	0.42629	0.697022	0.56078	0.657624	0.541	0.793965	1.13486	1.20775	1.216	1.42491	1.71436	1.523	1.95468	1.78255	2.2151	1.9645	2.1039	2.3585	2.00139	1.80334	1.84311	1.52063	1.23075	1.2605	1.2369	1.07531	0.9645	0.666147	0.570744	0.531346	0.448696	0.39485	0.446314	0.466951	0.42126	0.451275	0.347452	0.453591	0.534764	0.571597	0.575241	0.622618	0.637601	0.527343
MAL7P1.177	0.542	0.545129	0.533229	0.733708	0.465186	0.462937	0.384	0.54944	0.429478	0.507148	0.557	0.47755	0.576673	0.542	0.675973	0.59691	0.911028	0.646	1.25181	1.16	1.2522	1.01859	1.83409	1.77214	1.76149	1.826	1.3563	1.63873	1.899	1.05094	1.26999	1.17209	0.998386	0.776772	0.884771	0.682115	0.418644	0.597715	0.292291	0.436646	0.389692	0.571597	0.630354	0.76101	0.732643	0.470518
MAL7P1.19	0.9014	1.07468	1.11324	1.15394	1.25186	1.281	1.0076	1.42215	0.956303	1.70303	1.2684	1.33043	1.79865	1.1202	1.24823	1.08962	1.26045	1.2194	1.05886	1.0014	0.847001	1.02532	1.20474	1.03225	1.12575	1.022	1.19121	1.04205	1.0472	1.05997	0.64775	0.805738	0.961259	1.07304	1.19901	1.08845	0.794899	0.896334	0.657372	0.650668	0.653128	0.716208	0.826464	0.982894	1.00354	0.98786
MAL7P1.20	0.69	0.684608	0.829188	0.741298	0.701432	0.621477	0.527	0.998228	0.645518	0.75841	0.487	0.713743	1.12202	0.83	0.862012	0.885436	0.923962	0.973	1.01083	1.144	1.04505	0.995202	1.40737	1.22034	1.12624	1.506	1.3355	1.74183	1.652	1.36991	1.39755	1.08325	1.20614	1.11506	1.01047	0.857908	0.747017	0.897769	0.570935	0.789873	0.740536	0.700667	0.625761	0.66703	0.68229	0.744418
MAL7P1.21	0.632	0.664848	0.445196	0.418719	0.465186	0.470547	0.256	0.286561	0.173092	0.215808	0.153	0.184567	0.350275	0.23	0.374605	0.265163	0.466913	0.479	0.563399	0.647	0.726426	1.14766	1.01403	1.45865	1.87297	1.439	1.55517	1.82251	1.548	1.39473	1.85246	1.61954	1.96118	2.02112	2.0828	1.44755	0.88046	1.21934	0.623252	0.78857	0.801235	0.846859	0.779618	0.971892	0.88748	0.764875
MAL7P1.23	0.669	0.60092	0.688335	0.389624	0.358023	0.441376	0.203	0.297219	0.266797	0.254345	0.571	0.256844	0.357395	0.683	0.734899	0.490611	0.695985	1.058	1.31432	1.092	1.1463	1.43481	1.0871	2.08562	1.70575	1.535	1.29556	1.58226	1.278	1.74003	1.49135	1.22473	1.40043	1.142	1.13616	0.956792	0.604417	0.903746	0.400337	0.673869	0.792737	0.679594	0.562611	0.440102	0.576547	0.363685
MAL7P1.24	1.396	1.48312	1.52591	1.81656	1.31031	1.68814	1.334	1.52635	1.98601	1.52761	1.433	1.70111	2.18281	1.446	1.65415	1.54192	1.58707	1.53	1.22385	1.549	1.52717	1.10744	1.36677	1.01482	0.968041	1.033	0.842071	0.819366	0.752	0.707146	0.663133	0.529701	0.427055	0.361991	0.392795	0.394619	0.588717	0.389711	0.473126	0.623035	0.830371	0.837639	0.913956	1.3375	1.4955	0.988769
MAL7P1.25	0.549	0.338236	0.674082	0.376974	0.252077	0.405863	0.435	0.49497	0.445095	0.584222	0.698	0.625977	0.989599	1.272	1.13139	1.18915	1.70105	2.048	2.54969	1.463	2.35299	2.08581	1.9622	2.16239	1.70575	1.483	1.31802	1.41282	0.909	0.886942	0.766308	0.73204	0.608842	0.513898	0.61767	0.590556	0.69207	0.548703	0.491323	0.461411	0.64463	0.479404	0.688912	0.701413	0.556406	0.90353
MAL7P1.26	1.593	1.71442	2.10273	2.48322	2.09943	2.47703	1.741	1.82357	2.70441	2.09488	3.306	1.76048	2.13155	2.335	2.38905	1.64588	1.50048	3.517	4.47265	1.867	1.24477	1.07658	1.19266	1.13333	0.992631	1.044	0.786321	0.872258	0.629	0.534121	0.488674	0.368488	0.306826	0.221935	0.323074	0.26369	0.153067	0.380147	0.200168	0.299787	0.615495	0.533402	1.00007	1.03951	0.947904	1.14674
MAL7P1.27	2.216	1.99338	2.0868	2.9108	2.54391	2.47196	2.327	2.38012	3.19505	2.8687	2.049	2.16188	1.93933	1.791	1.94963	1.69611	1.61447	1.55	1.38752	1.121	1.37947	1.18601	0.539492	0.790903	0.542628	0.544	0.37111	0.318244	0.237	0.367114	0.353608	0.291994	0.242383	0.29304	0.318164	0.358911	0.48144	0.598911	0.657372	0.767715	1.38881	1.32758	1.80954	1.34094	1.47158	1.73546
MAL7P1.28	1.201	1.34713	1.47728	1.70271	1.53925	1.80355	1.361	1.67437	1.67106	2.02397	1.897	1.70111	2.2711	1.547	1.88144	1.49169	1.70325	1.883	1.64825	1.6	1.4928	1.1009	1.4191	1.09399	1.01476	1.055	0.887836	0.872258	0.773	0.598065	0.415513	0.405501	0.381849	0.336134	0.367264	0.408353	0.321832	0.394492	0.378728	0.520065	0.712614	0.736227	1.03222	1.39824	1.40612	1.01945
MAL7P1.29	1.0015	0.950198	1.34481	1.09993	1.01074	1.15988	0.9695	1.08053	1.16414	1.18925	1.0585	0.825387	1.12772	1.053	1.07836	0.791402	0.778736	0.8975	0.675667	0.6445	0.645608	0.740789	0.749244	0.784906	0.847548	0.7775	0.728491	1.13851	1.322	0.856474	1.08849	0.898189	1.12583	1.33915	1.29033	1.14174	1.01325	1.09621	0.948526	1.03426	0.954805	1.29531	1.0592	1.19194	1.4036	0.84159
MAL7P1.31	0.885	0.819437	0.790621	1.21315	1.02292	0.961387	1.144	1.61161	2.25931	1.91144	1.914	1.76564	1.90658	1.718	1.91427	1.61318	1.45335	1.776	1.7963	2.011	2.23501	1.35157	1.20799	1.11958	1.05001	1.171	0.887004	0.883912	0.827	0.930574	0.767246	0.549441	0.521315	0.47619	0.500814	0.316794	0.393787	0.445896	0.319587	0.358441	0.466173	0.479404	0.533906	0.722042	0.689843	1.06719
MAL7P1.33	0.402	0.298717	0.280867	0.245413	0.200931	0.258737	0.203	0.239196	0.298031	0.377664	0.527	0.642756	0.86145	0.882	1.17517	1.01393	1.39526	1.668	2.22892	2.21	2.41151	2.07271	2.51612	2.00325	1.62296	1.843	1.73906	1.35366	1.19	0.965931	1.05051	0.71559	0.65501	0.453566	0.510634	0.54386	0.48144	0.455459	0.413985	0.497907	0.507449	0.412234	0.420236	0.476777	0.391498	0.387552
MAL7P1.34	3.319	2.63615	2.54709	2.8273	1.85831	2.41615	2.367	2.04619	3.68049	2.4525	2.114	1.67142	1.6873	1.193	1.16591	0.817685	0.72229	0.779	0.652227	0.481	0.49605	0.369459	0.520546	0.447832	0.374593	0.403	0.372775	0.369342	0.387	0.552928	0.487736	0.551909	0.617499	0.628097	0.655968	0.49625	0.800656	0.908528	0.867776	1.37381	2.4984	2.32063	2.63853	1.85439	2.04183	2.16847
MAL7P1.38	0.94	0.910679	0.718937	1.01201	0.876181	0.805384	0.888	1.12671	1.08671	1.42973	1.2295	1.31133	1.55203	1.21	1.25051	1.06299	1.27415	1.242	1.21357	1.2895	1.23548	1.17713	1.46646	1.13837	1.16558	1.1755	1.18489	1.0018	1.092	0.879795	0.892931	0.793729	0.741095	0.750377	0.749257	0.657394	0.608995	0.702316	0.558425	0.820504	1.28137	1.12541	0.722209	0.570184	0.679143	0.744418
MAL7P1.58	0.119	0.0976351	0.137499	0.116381	0.0596704	0.0532695	0.152	0.177621	0.374817	0.832401	1.308	1.70369	2.8677	2.489	3.49014	3.06865	3.97972	4.42	3.81631	4.429	3.2587	2.30655	2.05241	1.41947	0.978697	0.912	0.640706	0.484986	0.425	0.384417	0.330159	0.260738	0.221222	0.172377	0.216037	0.164806	0.15045	0.153015	0.0693766	0.0886326	0.104403	0.0698033	0.110226	0.113464	0.178755	0.178433
MAL7P1.66	0.879	0.847914	0.860209	0.806446	0.625322	0.709626	0.5585	0.613383	0.605824	0.588076	0.6035	0.485939	0.626509	0.549	0.717221	0.494115	0.692149	0.941	0.831939	1.0835	0.890382	1.03262	1.62344	1.44666	1.42009	1.4035	1.59469	1.56522	1.597	1.31913	1.05238	1.06434	1.06668	0.886662	0.969222	0.752157	0.779724	0.786594	0.603349	0.870034	0.875289	0.946295	0.896733	1.12318	0.950422	0.843863
MAL7P1.67	0.802	0.772944	0.719356	0.829849	0.968122	0.930948	0.622	0.897577	1.28843	1.24552	0.981	0.951227	1.01523	0.912	1.08257	0.980054	1.04672	0.974	1.11117	1.036	0.96609	0.818423	0.818259	1.3267	1.10493	1.012	1.15577	1.22188	0.971	1.51811	1.5495	1.45832	1.39851	1.61711	1.28935	0.95496	0.855603	0.749535	0.59027	0.546133	0.728396	0.696716	0.701542	0.430933	0.524935	0.615992
MAL7P1.68	1.454	1.53368	1.93463	1.90574	1.47837	1.6374	1.371	1.65483	1.45762	1.82512	1.509	1.31649	1.46802	1.0785	1.20842	1.03087	1.15358	0.989	1.05853	1.1265	1.11844	0.995669	1.1259	1.09439	1.09427	1.0465	1.12956	0.931872	1.0475	0.885813	0.773811	0.704486	0.792072	0.654493	0.715869	0.515477	0.414065	0.579186	0.481087	0.606091	0.791523	0.889663	1.09767	1.38793	1.39039	1.37746
MAL7P1.69	0.876	1.00773	0.761276	0.836174	0.546776	0.736894	0.6	0.923628	0.760045	0.968052	0.722	0.507235	0.723333	0.502	0.577481	0.526823	0.641183	0.679	0.741054	0.966	1.01718	1.21033	1.6717	1.34749	1.68034	1.474	1.22483	1.42089	1.323	1.05019	1.19964	1.24858	1.49662	1.24758	1.1774	1.21957	1.08193	1.1249	0.738121	0.778142	0.895927	0.862663	0.738284	0.798831	0.745232	0.759193
MAL7P1.7	3.298	3.53656	2.31932	1.89625	2.01662	1.68518	1.294	1.45491	1.02294	1.17461	0.717667	0.976611	0.860975	0.418	0.540441	0.380029	0.344157	0.482667	0.226456	0.224	0.238116	0.245683	0.167501	0.194327	0.198636	0.233333	0.194708	0.127895	0.216	0.283109	0.320155	0.350941	0.52933	0.758457	0.81014	0.885681	1.30957	1.77681	2.10783	3.03654	4.32627	5.43895	3.77103	3.78404	3.99051	2.81098
MAL7P1.73	0.724	0.771782	0.620004	0.875389	0.86583	0.650649	0.3245	0.693905	0.635757	0.581139	0.3035	0.576286	0.531821	0.3085	0.315257	0.296703	0.37923	0.329	0.319533	0.339	0.50023	0.52379	0.887725	0.942846	1.06312	1.334	1.56183	1.72793	1.867	2.02778	2.05224	1.8009	1.7794	1.81426	1.78427	1.34454	1.19771	0.994001	0.684667	0.879157	0.871647	0.784958	0.82899	0.722615	0.843421	0.737599
MAL7P1.74	0.24	0.351021	0.361355	0.331433	0.319054	0.356398	0.161	0.18591	0.148365	0.129485	0.357	0.162625	0.193648	0.332	0.492458	0.283853	0.628031	0.884	0.912953	1.375	1.15559	1.3656	2.13541	1.66578	2.33445	2.214	1.74405	1.9767	2.119	1.39849	1.2109	1.01252	1.14651	0.770308	0.934853	0.61253	0.375471	0.58337	0.535678	0.606091	0.792737	0.601889	0.490275	0.500845	0.489688	0.351183
MAL7P1.76	1.69033	2.04297	2.32435	3.32783	2.58978	2.39374	2.49567	3.30453	2.85885	3.09633	2.35933	2.66567	2.94697	1.691	1.56689	1.33516	1.21587	1.31133	1.10953	0.916333	0.936055	0.800339	0.77255	0.653355	0.615032	0.534667	0.518667	0.406695	0.391667	0.383163	0.327971	0.268963	0.273482	0.270775	0.334858	0.310995	0.360644	0.453068	0.491323	0.587408	0.94651	1.0229	1.2477	1.72182	1.83329	1.71046
MAL7P1.77	0.401	0.342885	0.359678	0.316253	0.226504	0.2042	0.154	0.175252	0.183504	0.251262	0.219	0.280076	0.427165	0.412	0.554752	0.582892	0.682833	0.836	0.935982	1.129	1.2234	1.06816	1.63381	1.52903	1.70411	1.878	1.9371	2.01704	1.962	2.1267	2.02973	1.65819	1.58126	1.34346	1.33354	1.04011	0.675063	0.624015	0.497009	0.559168	0.500165	0.45438	0.459274	0.476777	0.446887	0.443241
MAL7P1.81	0.853	0.96124	1.16791	1.30296	1.62937	1.6336	1.282	1.94554	1.54352	2.40163	1.65	1.76564	2.42487	1.542	1.46391	1.73816	1.91149	1.502	1.65072	1.732	1.91825	1.75563	1.30362	1.6042	1.57378	1.28	1.33883	1.06948	0.861	0.681568	0.721286	0.481995	0.437635	0.390002	0.395741	0.37997	0.286509	0.366997	0.297978	0.380599	0.497737	0.608474	0.693504	0.736942	0.891257	0.867162
MAL7P1.83	0.708	0.660974	0.692247	0.672565	0.626337	0.600339	0.58	0.724298	0.646819	0.792837	0.824	0.689651	0.866196	0.726333	1.02392	0.812233	1.07814	1.17433	1.10706	1.274	1.24601	1.47223	1.51232	1.43413	1.47733	1.53433	1.3882	1.35276	1.35733	1.36765	1.17838	0.926428	1.00704	0.911082	0.886408	0.875914	0.64977	0.720048	0.59444	0.615215	0.683883	0.723496	0.670923	0.837034	0.775863	0.583033
MAL7P1.84	1.491	1.58715	1.0325	1.03668	0.810422	0.72104	0.6025	0.695089	0.436635	0.535666	0.4425	0.474323	0.454219	0.372	0.370396	0.325906	0.381422	0.393	0.442905	0.4195	0.43567	0.63837	0.568361	0.748119	0.768039	0.689	0.857465	0.931424	1.061	0.9885	1.52464	1.43258	1.93858	2.26352	2.44319	1.93739	1.9709	2.35978	2.30478	2.99656	2.30294	2.51621	1.54488	0.912295	1.16065	1.10583
MAL7P1.86	2.367	1.92597	1.35571	1.36115	0.953509	1.09329	0.972	1.17585	1.49276	1.30101	1.065	0.769242	0.875689	0.761	0.80056	0.745261	0.710234	0.764	0.893213	1.001	0.88806	0.900732	0.91479	0.769311	0.99673	1.034	0.677318	0.651728	0.707	0.677807	1.14524	1.24529	1.36004	1.34454	1.24516	1.27175	1.62355	2.02745	1.8436	2.63291	2.20583	2.28902	1.79461	1.24925	1.5811	1.32972
MAL7P1.87	0.682667	0.681508	0.61679	0.458778	0.435959	0.375	0.292	0.322086	0.182636	0.244582	0.168667	0.155741	0.17846	0.162667	0.214661	0.0989009	0.18998	0.295	0.285675	0.309	0.359807	0.460187	0.673312	0.736524	1.05247	1.033	1.371	1.69521	1.78133	1.51209	1.70833	1.4978	2.19427	2.49623	2.40456	2.13577	1.50494	1.6218	1.00425	1.00059	0.870028	1.01764	0.831287	0.849641	0.939092	0.866783
MAL7P1.88	0.317	0.331262	0.460287	0.418719	0.507808	0.509865	0.473	0.796925	0.761346	1.13299	1.371	1.18871	1.73714	1.626	2.16345	1.66691	1.9104	2.467	3.19533	2.576	2.3019	2.1148	2.05512	1.80972	1.5787	1.549	1.23232	0.951146	0.954	0.628156	0.528068	0.505025	0.41936	0.337212	0.384939	0.313132	0.346689	0.329939	0.0125105	0.278932	0.441893	0.28053	0.391531	0.641815	0.5199	0.451197
MAL7P1.89	1.283	1.1352	0.984014	1.09381	1.09761	0.811725	0.787	0.924417	0.739656	0.870425	0.918667	0.8213	0.967292	1.01233	1.0315	0.82664	0.915559	1.05033	1.26662	1.08367	0.893014	1.19412	1.50119	1.15157	1.07706	1.27433	1.08005	1.5718	1.37567	0.817982	0.695648	0.75699	0.774278	0.911441	0.98788	0.773674	0.730446	0.88422	0.771862	0.928036	1.09381	1.14978	1.00313	0.937127	0.968465	0.767148
MAL7P1.91	0.455	0.433546	0.670309	0.344716	0.284348	0.485767	0.249629	0.314981	0.168537	0.296736	0.448	0.121323	0.298304	0.547	0.554752	0.220775	0.471845	0.7055	0.785057	1.1145	0.892705	1.07985	1.83364	1.78013	1.94428	2.2295	2.15802	2.36352	2.148	1.71558	1.29906	1.12109	1.17681	1.04773	1.01243	0.819911	0.51153	0.959931	0.545345	0.62499	0.716256	0.640083	0.73771	0.628635	0.70306	0.615423
MAL7P1.93	1.344	0.832223	0.842602	0.707142	0.485888	0.526353	0.454	0.491417	0.598666	0.625842	0.588	0.610489	0.817309	0.778	0.985758	0.950851	0.977668	1.215	1.07334	1.169	1.10357	1.17666	0.920203	1.20355	1.26313	1.455	1.20403	1.31063	1.217	1.35185	1.48666	1.13261	1.10804	1.23249	1.34729	1.23513	1.19968	1.22412	1.08842	1.51849	0.885001	0.99305	0.77847	0.583364	0.771667	0.648951
MAL7P1.95	1.456	1.84809	1.3096	0.813403	0.711174	0.788896	0.539	0.551808	0.347486	0.420825	0.689	0.28653	0.482697	0.547	0.720589	0.537452	0.42636	0.698	0.690883	0.756	0.781233	1.00456	1.24137	1.16356	1.27706	1.076	1.22317	1.20843	1.256	0.788393	0.798198	0.894899	1.1619	1.15385	1.29819	1.17653	1.11725	1.84335	1.6548	1.78569	1.26255	1.83596	1.34338	1.49681	1.6453	0.85466
MAL8P1.10	0.7555	0.976932	1.12598	1.25679	1.70609	1.41989	0.8475	1.62641	0.990401	1.41662	1.101	1.59076	2.03331	1.161	0.9866	1.25807	1.39033	1.138	1.23865	1.222	1.24059	1.58727	1.46962	1.3339	1.39181	1.0945	1.10501	1.05603	1.092	0.73987	0.965623	0.585221	0.697812	0.62702	0.685428	0.523717	0.334915	0.40824	0.346883	0.385161	0.575433	0.710545	0.669392	1.059	1.06372	0.862616
MAL8P1.101	0.443	0.505998	0.504164	0.425466	0.400644	0.411782	0.207333	0.324454	0.181335	0.272843	0.295333	0.271472	0.367837	0.389667	0.517151	0.407285	0.630954	0.72	0.725976	0.748	0.845948	0.908215	1.41248	1.40401	1.57515	1.573	1.86526	1.74541	1.86967	1.80347	1.81807	1.32864	1.64442	1.56073	1.58296	1.20583	0.794551	0.797352	0.682013	0.613042	0.664459	0.59706	0.604711	0.586039	0.610116	0.571668
MAL8P1.103	0.839	0.990298	0.930635	1.69006	1.0765	1.08695	1.199	1.46359	1.27542	1.72184	1.371	1.19775	1.81688	1.31	1.42097	1.31764	1.47746	1.395	1.12762	1.356	1.06363	1.1486	1.09703	1.04921	0.912303	1.141	1.02014	0.990591	0.975	0.809456	0.812267	0.755071	0.664629	0.608705	0.690338	0.553932	0.512838	0.577393	0.450379	0.650407	0.750248	0.671692	0.942661	1.03951	1.05994	1.19789
MAL8P1.104	1.81067	1.9806	1.91884	1.76596	1.67443	1.86316	1.484	2.00475	1.17824	1.92788	1.36867	1.32552	1.53637	0.956333	0.943387	0.87064	0.960862	0.865667	0.810143	0.777	0.651182	0.731436	0.703986	0.725061	0.780334	0.752333	0.734177	0.652923	0.679333	0.708901	0.56965	0.597422	0.769469	0.813043	0.906048	0.884765	0.825949	1.04441	1.10206	1.43203	2.02534	1.96635	2.20681	2.5134	2.74091	2.29804
MAL8P1.105	0.768	0.724127	0.965848	1.12586	1.04241	1.11612	0.958	1.35939	1.44851	1.57848	1.53	1.45846	1.38829	1.227	1.32501	1.2604	1.68352	1.325	1.29952	1.431	1.34974	1.18788	1.40376	1.24993	1.24919	1.226	1.24064	1.12058	1.084	1.00279	0.853537	0.813469	0.683865	0.609782	0.580355	0.460542	0.359772	0.384929	0.294566	0.288056	0.444321	0.472818	0.651021	0.802269	0.635713	0.796698
MAL8P1.106	1.291	1.14372	0.690011	0.759008	0.537034	0.688698	0.429	0.435763	0.355295	0.277467	0.241	0.183276	0.232093	0.202	0.27443	0.11798	0.189615	0.243	0.116792	0.247	0.206223	0.263766	0.336506	0.283094	0.340986	0.48	0.499252	0.87405	1.009	1.25556	1.82432	1.4394	2.29783	2.23766	2.74269	2.57647	3.29289	3.24799	2.37586	2.52082	1.48107	1.69635	1.37897	1.40168	1.5811	1.17857
MAL8P1.109	2.093	1.8725	1.01699	1.00316	0.7404	0.626551	0.568	0.571939	0.50366	0.426991	0.297	0.298146	0.277657	0.153	0.164153	0.131998	0.142485	0.162	0.176833	0.162	0.160705	0.202033	0.213812	0.299887	0.364757	0.362	0.420203	0.612284	0.706	0.911015	1.40036	1.45586	2.11123	2.78496	2.6877	2.2432	2.87948	3.78713	3.74634	3.98716	2.94393	2.93964	1.92321	1.45325	1.60502	1.35814
MAL8P1.11	0.7885	0.793285	0.653541	0.725485	0.588789	0.748944	0.599	0.721732	0.669594	0.922578	0.8915	0.79312	1.00669	0.947	0.979024	0.954939	1.2188	1.109	1.20822	1.1545	1.16999	1.15655	1.32302	1.43666	1.49223	1.334	1.41413	1.34245	1.26	1.29882	1.1096	0.97715	1.13449	1.12745	1.06693	0.989753	0.715619	0.702913	0.565249	0.709713	0.750248	0.709228	0.722783	0.82691	0.771038	0.730212
MAL8P1.111	1.503	1.50637	2.02308	2.05818	1.57092	1.61204	1.36	1.61043	1.43029	1.65555	1.184	1.12031	1.14765	0.856	0.844334	0.656484	0.726675	0.777	0.785468	0.726	0.819319	0.630419	0.88953	1.03001	0.987713	1.046	1.08421	1.15375	1.136	1.20892	0.98954	0.95412	0.932981	0.923292	0.941726	0.79931	0.504989	0.702913	0.50952	0.615215	0.840083	0.948271	1.08848	1.1312	1.09896	0.977404
MAL8P1.113	0.355	0.407394	0.373512	0.307398	0.282521	0.253664	0.3665	0.29189	0.193916	0.235847	0.2685	0.276204	0.397976	0.611	0.799298	0.659988	0.909165	1.2935	1.31268	1.3885	1.21272	1.66911	2.18819	1.88569	1.97502	2.0175	1.91879	1.91036	1.785	1.42332	0.854475	0.815114	0.909897	0.885585	0.895082	0.882629	0.614883	0.808709	0.490185	0.625642	0.504414	0.509696	0.435163	0.515172	0.460105	0.482451
MAL8P1.114	1.294	1.4715	1.09329	1.81529	1.66955	1.073	1.065	1.37242	1.47324	1.57386	1.281	1.4946	1.40965	1.124	1.19369	1.19616	1.28565	1.176	1.08732	1.048	1.16767	1.09622	1.09522	0.957241	0.937713	0.984	0.954403	0.909013	1.005	0.662009	1.08896	0.803599	0.718491	0.885585	0.872987	0.737966	0.65413	0.736385	0.645998	0.78857	1.1448	1.05232	1.0437	1.17475	1.43759	0.989905
MAL8P1.12	1.148	1.22741	1.00106	0.937375	0.955945	0.776212	0.569	0.636711	0.592158	0.536436	0.471	0.411725	0.502631	0.352	0.610312	0.224279	0.37923	0.684	0.219602	0.375	0.249883	0.284343	0.332897	0.418243	0.466397	0.523	0.681478	0.90722	1.146	1.11564	1.48478	1.27079	2.43441	3.37535	3.7728	2.74677	2.19526	2.82361	2.06196	2.4022	1.492	2.0243	1.2653	1.28019	1.31548	1.04219
MAL8P1.122	2.778	4.62023	2.49846	2.7261	3.17349	1.79214	1.408	1.69924	1.06719	1.51682	1.073	1.15644	1.0252	0.786	0.641458	0.628449	0.42636	0.502	0.50418	0.311	0.257314	0.549045	0.267039	0.605373	0.559841	0.514	0.439341	0.576425	0.559	0.763567	1.27749	1.08161	1.7515	2.09007	2.0445	1.51988	1.41031	2.42553	1.70484	2.54688	2.72784	3.3927	1.75787	0.571903	0.947904	0.798971
MAL8P1.123	0.609	0.598596	0.599463	0.727382	0.543123	0.606257	0.604	0.555361	0.91752	0.87248	1.016	0.749882	0.889927	0.904	1.09267	0.886604	0.931634	1.203	1.2658	1.193	0.967019	1.10183	1.5454	1.24673	1.05984	1.625	1.62839	1.61453	1.667	1.62267	1.29156	1.28313	1.31098	1.34992	1.24221	0.844174	0.749634	0.677809	0.550463	0.551347	0.606997	0.595303	0.551129	0.551274	0.5413	0.562575
MAL8P1.124	0.5795	0.519558	0.563412	0.463627	0.46823	0.494645	0.439	0.528718	0.543354	0.621989	0.633	0.672442	0.890639	1.012	1.18611	1.22477	1.38375	1.52	2.20301	2.182	1.82303	1.98152	2.6713	1.80652	1.72665	1.7795	1.41247	1.23757	1.0625	0.815851	0.832433	0.726694	0.687232	0.672269	0.673644	0.66014	0.588717	0.720247	0.461752	0.568292	0.59425	0.543939	0.4432	0.615455	0.485282	0.508023
MAL8P1.125	0.751	0.664848	1.14611	1.09171	1.01683	1.04002	1.006	1.25282	1.55132	0.964969	1.31	1.47653	1.63889	1.31	1.5262	1.12607	1.14865	1.329	1.13913	1.195	1.31351	1.09061	1.24047	1.01642	1.10083	1.118	0.938593	0.995073	1.022	0.996023	1.08803	0.871868	0.857958	0.870502	0.97315	0.824031	0.975963	0.827238	0.675569	0.745557	0.611853	0.578182	0.680874	0.85499	0.759079	0.814882
MAL8P1.126	0.929	0.985649	1.42781	0.955085	1.11304	0.792701	0.936	1.3215	0.819912	1.1222	1.069	0.99382	1.13911	0.997	0.949561	0.913471	0.962323	0.868	0.713913	0.64	0.732928	0.634161	0.739771	0.730126	0.751646	0.879	0.705609	1.15823	1.293	0.967436	0.983913	0.853773	1.36388	1.76471	1.85203	1.17104	1.04138	1.39148	1.08728	1.02058	0.933561	0.738861	0.920845	1.0865	1.04358	0.829657
MAL8P1.127	0.982	1.16348	1.26851	1.47501	1.27378	1.08188	1.108	1.62937	1.12055	1.75113	1.521	1.44685	2.0148	1.437	1.60617	1.54659	1.60022	1.551	1.4122	1.423	1.18532	1.39085	1.20258	1.08759	1.19181	1.12	1.06341	0.985212	1.008	0.874153	0.686582	0.684334	0.72811	0.669037	0.773807	0.699511	0.48144	0.58337	0.479949	0.448377	0.587573	0.665107	0.785359	0.981061	0.903845	1.00809
MAL8P1.128	0.581	0.542804	0.549997	0.631242	0.502937	0.522548	0.479	0.571939	0.839433	0.87248	0.746	0.779568	0.919829	0.715	0.847702	0.934497	0.994108	0.993	1.02563	1.262	1.59591	1.30012	1.66719	1.40667	1.41722	1.52	1.6467	1.62708	1.781	1.81526	1.87309	1.39581	1.32733	1.22495	1.21668	0.982428	0.753558	0.619233	0.514069	0.616518	0.484383	0.5255	0.530462	0.575342	0.605501	0.628493
MAL8P1.13	1.227	1.20649	0.736124	1.06261	0.701432	0.611331	0.46	0.506811	0.421669	0.359166	0.357	0.241356	0.270538	0.26	0.327464	0.140175	0.200575	0.319	0.260726	0.276	0.222015	0.203904	0.198475	0.299088	0.384429	0.545	0.607423	1.05962	1.252	1.40752	1.60953	1.86876	2.2959	2.79035	2.89392	1.81378	2.56419	2.37771	1.6912	1.81045	1.51021	1.34865	1.62468	1.22289	1.52949	1.27403
MAL8P1.131	1.446	1.29366	1.2551	1.67614	1.41991	1.15164	1.202	1.32268	1.47324	1.59081	1.465	1.52816	1.67449	1.445	1.51105	1.45898	1.51692	1.622	1.6244	1.568	1.48815	1.47503	1.43173	1.10199	1.0123	1.132	0.842071	0.827434	0.849	0.724449	0.680016	0.544506	0.516506	0.467572	0.567589	0.438568	0.419952	0.473391	0.468576	0.655621	0.926277	0.932466	0.910512	0.953554	1.11785	1.05923
MAL8P1.132	1.973	2.20202	3.36831	3.22072	3.08033	4.01487	2.578	3.8224	3.10981	3.61632	2.696	2.80464	2.52739	1.4725	1.06489	0.872586	0.987313	0.685	0.555174	0.6905	0.43567	0.55606	0.637376	0.574584	0.58607	0.6345	0.584124	0.541463	0.6555	0.469801	0.436148	0.491865	0.453506	0.364684	0.428638	0.585062	0.478169	0.442309	0.403749	0.559819	0.876503	0.916662	1.08905	1.32088	1.32241	1.29961
MAL8P1.133	0.502	0.893826	0.800682	0.719792	0.556518	0.585964	0.409	0.407343	0.385228	0.319087	0.552	0.273623	0.271962	0.388	0.596843	0.337587	0.488712	0.825	0.710623	0.543	0.46168	0.588329	0.93554	0.972435	1.40411	1.448	1.21485	1.61005	2.047	1.14347	1.76054	1.16468	1.85634	1.54708	1.48968	1.06392	0.922324	1.03046	0.622115	1.07402	0.971194	1.16558	0.838176	0.991376	0.874892	0.751237
MAL8P1.134	0.942	0.836872	0.720194	0.643892	0.547994	0.481962	0.417	0.318533	0.317553	0.283633	0.442	0.144556	0.222126	0.427	0.574114	0.0852728	0.165502	0.523	0.145579	0.351	0.149558	0.15059	0.345527	0.470224	0.545087	0.944	1.001	1.4451	1.455	1.91907	2.25859	2.48811	2.74508	2.69339	2.77804	1.91725	1.63009	1.99517	1.24082	1.27735	1.04039	0.936418	1.19871	0.923756	1.01336	0.856933
MAL8P1.138	1.011	0.943805	0.689173	0.774188	0.400644	0.341178	0.397	0.364714	0.346185	0.248179	0.282	0.176822	0.240636	0.373	0.319887	0.124989	0.160022	0.368	0.413707	0.438	0.414304	0.607036	1.10785	0.926053	1.10903	1.564	1.48777	2.04662	2.162	1.71295	2.30924	1.79638	1.89482	1.93062	1.56627	1.25527	1.19313	1.15957	0.789301	1.15483	0.99426	1.23144	0.901326	0.863013	0.975599	0.795561
MAL8P1.139	0.487167	0.543773	0.480549	0.557027	0.526074	0.553622	0.462667	0.564242	0.44054	0.760722	0.720333	0.781289	1.05415	0.826167	0.946614	0.923594	1.05603	1.07817	1.09362	1.03017	0.903542	1.15655	1.28392	1.28498	1.39837	1.31183	1.4739	1.48843	1.6145	1.4652	0.898872	1.14042	1.38777	1.38799	1.51504	1.27114	0.868031	0.946981	0.574916	0.616301	0.561654	0.53011	0.624996	0.707334	0.687535	0.656149
MAL8P1.14	0.5425	0.550941	0.54832	0.462995	0.422564	0.292982	0.4685	0.287746	0.226452	0.257428	0.343	0.212961	0.262707	0.4645	0.590529	0.301959	0.546924	0.715	0.834406	0.971	0.907568	1.18975	1.70508	1.73855	1.70165	1.694	1.75237	1.97401	1.879	1.65878	1.48525	1.38224	1.36629	1.23573	1.13371	0.777794	0.588717	0.65151	0.485067	0.512896	0.65677	0.646668	0.651596	0.694536	0.609907	0.484156
MAL8P1.140	0.571	0.639277	0.593594	0.507903	0.425	0.437571	0.371	0.32919	0.33317	0.510231	0.637	0.387848	0.4948	0.5225	0.748368	0.505212	0.710782	0.7555	0.991911	0.998	1.19647	1.15795	1.43173	1.40227	1.58362	1.4325	1.69662	1.68221	1.7805	1.46921	1.81916	1.43488	1.51393	1.42749	1.29721	0.932071	0.595913	0.732202	0.544777	0.527886	0.558437	0.647985	0.638391	0.789662	0.813838	0.650655
MAL8P1.141	2.1215	2.58326	2.24778	2.7008	2.35394	2.0699	1.906	2.26407	1.84415	2.30914	2.165	1.9244	2.18068	1.5315	1.45338	1.30479	1.39087	1.263	1.27855	1.064	0.814674	0.986316	0.788488	0.678146	0.526234	0.5465	0.417707	0.261767	0.3375	0.291134	0.238709	0.240586	0.274123	0.353911	0.452696	0.350213	0.391824	0.533162	0.544777	0.686251	1.29715	1.59296	1.62296	1.98275	2.13813	1.67466
MAL8P1.142	0.574857	0.573523	0.64881	0.629796	0.553561	0.525447	0.573571	0.743639	0.80448	0.918724	1.05229	0.91472	1.16575	0.780714	1.06156	0.820855	0.962949	1.07157	0.92294	1.12514	0.822504	0.969814	1.31548	1.03664	1.18502	1.37486	1.35119	1.38119	1.76871	1.22515	1.36378	1.18489	1.31332	1.22587	1.37436	0.91559	0.99297	0.770028	0.524143	0.586726	0.529474	0.622773	0.578686	0.749123	0.685527	0.661128
MAL8P1.143	1.092	1.06817	1.03502	1.29537	1.1173	1.10915	0.8665	0.966849	0.736619	0.939534	0.852	0.704063	0.786696	0.7095	0.699543	0.591069	0.768324	0.6225	0.595064	0.6815	0.671619	0.697296	0.782173	0.82529	0.86845	1.0105	1.19072	1.22322	1.3175	1.46131	1.37082	1.44845	1.56443	1.82935	1.98116	1.6444	1.44759	1.47576	1.10093	1.3725	1.09502	1.1399	1.2188	1.18277	1.38661	1.13595
MAL8P1.144	2.503	2.24793	1.21486	1.66729	1.06433	1.0489	0.927	1.07875	0.80039	0.985008	0.828	0.780858	0.868569	0.636	0.682707	0.71489	0.690505	0.653	0.754214	0.654	0.579654	0.692152	0.544002	0.626965	0.534431	0.516	0.474289	0.426716	0.462	0.574744	0.745673	0.962345	1.31579	1.73131	1.73812	1.43565	2.03304	2.45661	3.19019	3.6183	3.50358	3.29919	2.35034	1.89221	1.94364	1.50134
MAL8P1.146	0.763	1.01006	0.598625	0.772923	0.701432	0.450254	0.328	0.346952	0.219945	0.206559	0.16	0.127777	0.130997	0.124	0.138057	0.047893	0.055898	0.082	0.107745	0.11	0.124477	0.191745	0.356353	0.440635	0.74017	0.816	1.19155	1.45406	2.053	1.64073	2.207	2.09989	2.61908	2.70308	3.12567	2.41075	1.90352	1.69273	1.00994	1.24868	1.16058	1.3526	1.17919	1.10828	1.45144	1.05582
MAL8P1.15	0.63	0.648576	0.623777	0.551546	0.604011	0.678552	0.6604	0.74127	0.829022	0.898685	1.046	0.939611	1.08215	1.144	1.38814	0.998743	1.11577	1.559	1.98135	1.658	1.21969	1.26832	2.47372	1.71136	1.60657	1.59	1.61092	1.43075	1.29	1.05395	1.028	0.803599	0.918553	1.08274	1.10277	0.926577	0.757483	0.841583	0.597094	0.680386	0.910495	0.845542	0.730246	0.900834	0.626901	0.693275
MAL8P1.150	1.26125	1.15884	0.863562	0.715365	0.784544	0.720406	0.62825	0.729725	0.516674	0.626228	0.505	0.442056	0.486256	0.374	0.408909	0.295243	0.283052	0.33225	0.222686	0.225	0.215048	0.198292	0.236591	0.273297	0.389143	0.3655	0.597438	0.902737	0.98725	1.16171	1.13914	1.51384	2.2656	2.83398	3.22264	2.9205	2.67245	3.11499	2.27208	2.6202	1.55421	1.64466	1.34883	1.36701	1.45836	1.29591
MAL8P1.151	1.4	1.22044	0.914705	1.25995	0.793982	0.994364	1.06	0.889288	1.04376	1.09137	1.427	0.831195	1.00953	0.944	0.975657	0.697368	0.784765	0.736	0.733652	0.842	0.642822	0.608906	0.857052	0.821292	0.819679	0.956	0.912798	1.04886	1.066	1.13595	1.06739	1.41637	1.65243	1.76471	1.72633	1.54918	1.74391	1.52417	1.30337	1.85346	1.38152	1.45138	1.3939	1.02347	1.23744	0.991042
MAL8P1.152	1.339	1.11234	1.74976	1.45223	1.60501	1.79848	1.557	2.00119	2.03286	2.2259	1.786	1.90504	2.4861	1.542	1.52704	1.4695	1.68681	1.428	1.32419	1.184	1.25034	1.23745	1.33159	1.10359	1.05083	1.029	0.924447	0.796955	0.885	0.614615	0.647188	0.478705	0.48188	0.471881	0.448769	0.41934	0.440884	0.487736	0.454928	0.68951	0.657984	0.85081	0.927734	1.17131	1.25254	1.15243
MAL8P1.153	0.9455	0.90603	0.640545	0.605941	0.597922	0.512402	0.376	0.499706	0.280462	0.350688	0.228	0.230385	0.233517	0.204	0.228551	0.0940337	0.138649	0.2445	0.164085	0.191	0.181142	0.29697	0.42176	0.61337	0.859433	0.8075	1.08712	1.407	1.543	1.68474	1.42522	1.70055	2.24108	2.60612	2.76921	2.45378	1.68242	2.20736	1.42506	1.36468	0.99426	1.10961	1.04542	0.934071	0.918322	0.8808
MAL8P1.154	1.231	1.49126	1.816	1.22959	2.09821	2.27537	1.319	2.09	1.06719	2.46483	1.953	1.50364	2.07033	1.303	1.57671	1.27676	1.59583	1.135	1.67457	1.561	1.34602	1.39085	1.39564	1.20915	1.3287	0.998	0.887004	0.610491	0.621	0.407737	0.292641	0.337232	0.383773	0.383538	0.394759	0.406522	0.36893	0.505667	0.464027	0.414488	0.832799	0.860029	0.913956	1.59995	1.67677	1.2263
MAL8P1.155	1.695	1.26809	1.60556	1.46742	1.40165	1.76043	1.43	1.58674	2.14478	2.06713	2.031	1.46879	1.55346	1.206	1.43613	1.00458	1.51254	1.723	2.11789	2.52	1.47607	1.86413	1.21972	1.09479	1.12788	1.028	0.78965	0.763786	0.741	0.631918	0.695023	0.70572	0.627117	0.630252	0.646148	0.447723	0.497139	0.594129	0.36508	0.718185	0.738108	0.997002	1.23086	1.28363	1.32807	1.05241
MAL8P1.156	0.932	0.945549	1.1155	1.18215	1.10756	1.255	1.0635	1.77265	1.12055	1.87599	1.378	1.68304	2.18281	1.3775	1.49716	1.44613	1.8534	1.662	1.35791	1.3125	1.26614	1.31976	1.24543	1.25033	1.22747	1.0135	1.01514	0.869568	0.798	0.667651	0.599352	0.525177	0.611728	0.576923	0.580846	0.554848	0.42126	0.464425	0.415122	0.551999	0.544476	0.600572	0.706134	0.830922	0.854121	0.889324
MAL8P1.157	0.4045	0.480039	0.408725	0.425361	0.388771	0.419497	0.35925	0.454117	0.360175	0.663223	0.686	0.687284	1.04905	0.9455	1.20042	1.05715	1.44869	1.59675	1.61494	1.808	1.48838	2.01683	2.06256	1.88949	2.01457	1.767	1.9606	1.64142	1.538	1.14516	0.803122	0.73348	0.761534	0.690315	0.743365	0.54821	0.36664	0.502978	0.344608	0.393633	0.504414	0.483684	0.479655	0.546689	0.503535	0.52365
MAL8P1.16	0.753	0.597434	0.552512	0.633772	0.456661	0.423619	0.451	0.647723	0.901903	0.756869	0.643	0.549828	0.643596	0.586	0.674289	0.609759	0.636799	0.614	0.671966	0.895	0.964232	0.78475	1.21431	0.962039	1.51231	1.707	1.34049	1.67907	1.709	1.36389	1.8684	1.5488	1.45045	1.0655	1.09786	1.02363	0.792806	0.959931	0.587995	0.677779	0.622778	0.566329	0.628058	0.589095	0.568994	0.792152
MAL8P1.160	4.683	3.26612	4.0512	3.80642	4.79555	2.97929	2.767	2.19894	2.53912	1.74804	1.183	1.03125	1.06791	0.676	0.8376	0.462576	0.471297	0.665	0.385743	0.363	0.275893	0.242253	0.285083	0.203124	0.144263	0.219	0.200533	0.181085	0.245	0.205373	0.148197	0.350392	0.277009	0.356604	0.412435	0.472444	0.851678	0.994599	1.1976	1.80524	2.23739	2.76052	2.88539	2.74261	3.28682	2.48101
MAL8P1.17	0.822	0.657874	0.884523	0.894997	0.939505	0.807286	0.89	1.05625	1.30275	1.30487	1.016	1.22291	1.38686	1.029	1.07204	0.948514	0.837923	1.0295	0.960657	0.8995	0.969342	0.839935	1.24859	1.01882	1.1578	1.2915	1.37835	1.5065	1.5225	1.40639	1.68081	1.25886	1.26289	1.1894	1.08853	0.932528	0.909241	0.743558	0.598231	0.690161	0.5639	0.555134	0.657911	0.743818	0.791808	0.773399
MAL8P1.18	0.468	0.396352	0.619585	0.326373	0.407951	0.457864	0.28	0.337479	0.200423	0.362249	0.303	0.384621	0.654987	0.528	0.574956	0.607423	0.852719	0.799	0.893213	0.95	1.02368	1.76686	1.74839	1.72255	1.93608	1.539	2.13014	1.71314	1.644	1.15175	1.16119	0.781391	1.20133	1.28636	1.13125	0.917421	0.79019	0.724431	0.474263	0.615215	0.560865	0.565011	0.560315	0.632647	0.613054	0.604626
MAL8P1.19	0.8545	1.13908	1.42446	1.58253	1.69269	1.64945	1.2275	2.06691	1.21946	2.11646	1.573	1.69853	2.62991	1.432	1.56282	1.50162	1.93287	1.4955	1.38177	1.536	1.28564	1.61019	1.21837	1.10718	1.18812	0.8625	0.854968	0.743615	0.668	0.443095	0.347512	0.322427	0.331833	0.281189	0.339768	0.313132	0.296975	0.286306	0.249073	0.337586	0.499558	0.590694	0.746321	1.27675	1.1682	1.08708
MAL8P1.2	0.215	0.178998	0.441842	0.478175	0.471275	0.698845	1.211	1.52162	3.15861	3.15233	4.782	3.45643	4.33003	4.213	3.49267	4.00081	4.27346	3.785	3.28992	2.438	1.54667	0.918504	0.838107	0.598176	0.404102	0.483	0.238809	0.182878	0.204	0.273455	0.211977	0.135715	0.110611	0.127128	0.161046	0.159313	0.281712	0.257018	0.14444	0.182479	0.230659	0.230483	0.287046	0.340391	0.366322	0.52507
MAL8P1.20	0.562	0.711341	0.684143	0.654012	0.568696	0.577086	0.363	0.564834	0.356596	0.430074	0.559	0.394947	0.579521	0.586	0.599368	0.362118	0.515139	0.591	0.737765	0.878	0.868552	0.925051	1.32347	1.41627	1.33608	1.659	1.69579	2.11565	2.128	1.55948	1.38067	1.26256	1.31483	1.23572	1.15285	0.86981	0.59395	0.712477	0.519756	0.509638	0.667696	0.669058	0.629206	0.841237	0.764114	0.562575
MAL8P1.21	0.577	0.573025	0.501369	0.526245	0.481017	0.451522	0.485	0.536415	0.743126	0.835484	1.107	0.909926	1.431	1.293	1.52957	1.53842	1.7701	1.626	1.62111	1.542	1.25499	1.47597	1.71681	1.15477	0.943451	1.14	1.03844	0.860603	0.945	1.00956	1.00642	1.15564	1.02628	1.00517	1.18133	0.865233	0.926249	0.802134	0.531129	0.587843	0.639774	0.669058	0.632651	0.805708	0.552629	0.793288
MAL8P1.22	0.679	0.70088	0.653121	0.643892	0.534598	0.421083	0.312	0.410896	0.264194	0.263594	0.304	0.234903	0.236365	0.315	0.361136	0.255819	0.297027	0.342	0.3915	0.428	0.623314	0.64632	0.596328	1.18516	1.16312	1.083	1.46697	1.47289	1.312	1.91682	2.59063	1.66724	2.07564	1.9791	2.20555	1.562	1.33966	1.16794	0.822283	0.778142	0.979692	0.882419	0.793396	0.648692	0.735161	0.60349
MAL8P1.23	1.1835	1.33812	1.51637	1.7979	1.57777	1.5288	1.35387	1.70664	1.26875	1.90662	1.55225	1.68235	1.99362	1.34675	1.49579	1.36612	1.4776	1.49175	1.11014	1.09425	0.935784	1.07213	1.095	1.03191	1.04089	1.003	1.02253	0.894781	0.8555	0.905561	0.487501	0.597353	0.587321	0.592545	0.650813	0.56263	0.435814	0.533461	0.430476	0.470209	0.668303	0.622961	0.928595	1.0292	1.10195	1.1476
MAL8P1.24	0.582	0.78108	0.459449	0.586966	0.58818	0.531427	0.465	0.472471	0.439889	0.618135	1.127	1.00802	1.35696	1.297	1.43781	1.96595	2.49239	1.843	2.89513	2.576	2.53785	2.82753	1.82687	2.07522	2.05166	1.245	1.30388	0.987005	0.711	0.544653	0.625615	0.507493	0.459758	0.474036	0.49885	0.332359	0.514147	0.615647	0.502696	0.736433	0.678622	0.894272	0.568352	0.641815	0.619348	0.435286
MAL8P1.29	0.604	0.583486	0.689592	0.411762	0.683774	0.499084	0.363	0.526941	0.302586	0.462445	0.3545	0.466579	0.5902	0.443	0.465941	0.508717	0.65598	0.555	0.635654	0.7135	0.795631	1.12475	1.16198	1.35029	1.71682	1.238	1.6026	1.43031	1.573	1.1382	1.17526	0.982908	1.58078	1.66828	1.56823	1.4828	0.966151	1.09501	0.768829	0.78857	0.743571	0.860688	0.590742	0.791381	0.691731	0.790447
MAL8P1.3	0.814	0.962403	1.14191	1.31435	1.10573	1.32413	0.991	1.254	1.60729	1.83591	1.75	1.61593	1.96496	2.052	2.13399	2.09561	2.48034	2.276	3.06785	3.601	2.75057	2.92387	2.18323	2.19038	1.36395	1.036	0.78965	0.560289	0.448	0.298656	0.449279	0.347102	0.279894	0.277957	0.359408	0.254534	0.30497	0.217568	0.196757	0.271112	0.434852	0.446478	0.48109	0.435518	0.492205	0.572804
MAL8P1.32	0.35	0.306853	0.25823	0.255533	0.186318	0.237176	0.216	0.252221	0.412559	0.652048	0.685	0.720197	1.07218	1.223	1.67773	1.56645	1.82381	2.094	3.07772	2.895	2.6038	2.58528	2.55311	2.28394	1.87788	2.123	1.61758	1.30973	1.312	1.18485	1.03456	0.882561	0.765621	0.595777	0.636328	0.555763	0.379396	0.363411	0.272957	0.331069	0.299856	0.279213	0.291639	0.236096	0.230367	0.287538
MAL8P1.34	0.3845	0.345791	0.427589	0.340288	0.350107	0.291855	0.24485	0.209592	0.162681	0.258199	0.318	0.242002	0.447812	0.579	0.816555	0.737084	0.995204	1.2195	1.31556	1.633	1.39897	1.40628	2.00731	1.80492	1.68239	2.076	1.96414	1.90364	1.7295	1.46921	1.32251	0.90847	0.902202	0.92006	0.822415	0.740712	0.571056	0.598911	0.507814	0.465973	0.532943	0.484672	0.447218	0.399415	0.353104	0.417101
MAL8P1.35	0.795	0.493987	0.76966	0.552811	0.500501	0.624014	0.493	0.404975	0.403449	0.349917	0.713	0.59242	0.798799	0.784	1.21894	1.18915	1.36238	1.065	2.17299	1.266	2.24988	1.50496	3.13771	1.84411	1.63116	1.401	1.41122	1.5957	1.209	0.936592	0.988602	0.717235	0.604033	0.937298	0.81996	0.746206	1.32658	0.846365	0.837068	1.11312	1.00276	0.464916	0.452385	0.916879	0.610536	0.810336
MAL8P1.38	1.177	0.97635	1.08826	1.12966	1.18367	0.804116	1.011	1.21019	1.20124	0.948013	0.807	1.22098	0.837244	1.366	1.341	0.995239	0.978764	1.066	1.13996	0.724	1.06084	0.787556	1.1692	0.58538	0.713121	0.827	0.656516	0.822056	0.637	0.682321	1.00361	0.761651	0.71272	0.925447	1.12045	0.812128	0.846445	1.0986	0.925779	1.11834	1.2844	1.39738	1.57646	1.31458	1.67803	0.92967
MAL8P1.4	3.884	3.92865	5.08663	4.29092	4.16841	3.65403	3.475	3.94318	3.55555	3.7196	2.72	2.56199	2.38643	1.405	1.32332	0.87025	0.652144	0.698	0.462234	0.362	0.280538	0.184262	0.188551	0.13195	0.100821	0.141	0.096522	0.0618559	0.07	0.0895217	0.0891055	0.0995246	0.103878	0.179918	0.283795	0.326866	0.426493	0.59652	0.848441	1.09357	1.7785	1.90971	2.08855	3.26524	3.11562	2.61626
MAL8P1.40	1.1795	1.08619	0.960399	1.25047	1.31945	1.09646	1.1935	1.61576	2.01334	2.3762	1.5615	1.66884	2.32591	1.4845	1.4315	1.61259	1.62598	1.4435	1.55202	1.3495	1.76126	1.21688	1.36632	1.05041	0.946729	0.956	0.92528	0.740478	0.7475	0.722568	0.756459	0.688447	0.655491	0.537061	0.590175	0.502201	0.456583	0.490127	0.491891	0.580022	0.761781	0.710545	0.865158	1.27962	1.00518	1.07287
MAL8P1.41	0.992	1.03795	1.00525	1.46109	1.65372	2.57976	1.765	2.95561	2.56515	3.24791	2.712	2.7401	2.57296	2.115	2.22911	2.05823	1.78655	3.627	1.96079	1.869	1.6052	1.41517	1.1268	1.30911	1.08607	0.843	0.534199	0.441956	0.485	0.310693	0.331097	0.26156	0.255848	0.227322	0.280849	0.233475	0.181848	0.358629	0.312763	0.401454	0.69926	0.846859	1.07011	1.1163	1.08764	1.16948
MAL8P1.42	0.750333	0.679958	0.805712	0.902798	0.778557	0.77283	0.774	0.80995	0.879344	1.0852	1.081	0.973169	1.16236	1.08233	1.22427	0.97616	1.22135	1.05367	1.21727	1.15	1.03886	1.31166	1.29069	1.22834	1.17378	1.19767	1.17934	1.35157	1.147	0.990506	1.00048	0.940137	0.97947	0.953458	1.06447	0.894531	0.56953	0.815682	0.605055	0.728612	0.764411	0.843347	0.96218	1.07351	1.20345	0.904288
MAL8P1.43	1.259	1.34364	1.41859	2.19986	1.42113	1.31779	1.558	1.56069	2.19294	1.72184	1.686	1.36424	1.54491	1.349	1.39824	1.22069	1.24401	1.383	1.54379	1.413	1.76219	1.06629	1.32166	1.0564	1.00657	1.117	0.887004	0.899151	0.762	0.8072	0.847909	0.647321	0.619422	0.555915	0.525364	0.525549	0.416027	0.424378	0.366217	0.436646	0.738108	0.704618	0.950698	0.92834	0.960493	1.0365
MAL8P1.47	1.517	1.49823	3.37041	1.74825	2.15057	2.08766	1.616	1.69095	1.56564	1.90373	3.249	1.20549	1.34842	1.226	1.56156	0.804835	0.891081	1.1832	1.566	1.2165	0.842542	1.12615	1.1683	0.990828	1.24591	1.17	0.867866	1.22726	1.653	0.771842	1.28312	0.96728	1.17536	0.909287	0.971186	0.963201	1.42993	1.02209	1.0634	0.831583	1.12052	1.15241	1.30893	1.23549	1.46906	1.48429
MAL8P1.48	1.246	1.2925	1.41775	2.11763	1.63546	1.76423	1.416	1.9562	2.68749	2.25365	1.905	1.72434	1.92794	1.59	1.73328	1.41109	1.48623	1.269	1.52981	1.478	1.89317	1.23558	1.13131	1.22194	1.17788	1.012	0.815444	0.713584	0.717	0.613863	0.786943	0.48364	0.457834	0.315665	0.369227	0.260943	0.304825	0.249845	0.303665	0.351924	0.432181	0.550524	0.696949	1.0418	0.853491	1.05923
MAL8P1.54	0.929333	1.11815	1.13716	1.30001	1.29083	1.40234	0.827667	1.04638	0.756141	1.06825	0.809	0.736115	0.791679	0.501667	0.523886	0.352773	0.477143	0.423667	0.344619	0.441667	0.43567	0.561204	0.737065	1.00656	1.12433	1.25167	1.25506	1.53713	1.81567	1.59058	1.50729	1.52577	1.75471	1.42067	1.4959	1.19027	0.760972	0.84238	0.517102	0.735564	0.7721	0.893833	0.927734	1.14877	1.13169	0.999376
MAL8P1.55	0.5765	0.581742	0.53281	0.475012	0.485279	0.483864	0.3425	0.454117	0.329266	0.365332	0.4205	0.280722	0.402247	0.6075	0.749631	0.494115	0.735443	0.887	1.15682	1.252	1.31583	1.18788	1.44481	1.65898	1.78444	1.589	1.44949	1.58853	1.369	1.29806	1.47446	1.1725	1.07004	0.956152	1.04729	1.04469	1.02175	0.930045	0.65794	0.66279	0.724147	0.60123	0.575815	0.540386	0.461993	0.477337
MAL8P1.57	2.173	1.82601	2.00883	2.36051	2.02636	2.06483	1.872	1.73713	2.09793	1.69872	1.594	1.52816	1.4723	1.314	1.35952	1.00692	1.01055	1.087	1.02646	0.815	0.885273	0.729565	0.540394	0.654954	0.552464	0.61	0.445998	0.518155	0.49	0.615368	0.699713	0.691737	0.701178	0.797242	0.893609	0.801141	1.15389	1.11773	0.915543	1.01667	1.50778	1.35655	1.60516	1.28707	1.48543	1.37632
MAL8P1.58	0.8205	0.789217	0.962914	1.25616	0.84391	1.19666	1.069	1.21907	1.50122	1.48214	1.4735	1.14096	1.37761	1.239	1.24798	1.03904	1.07302	1.0895	1.08238	1.402	1.0274	1.08967	1.24047	1.21354	1.14796	1.4725	1.23939	1.21246	1.149	1.36577	1.1504	1.21321	1.23548	1.21202	1.1774	0.968694	0.726739	0.796755	0.473694	0.584584	0.637953	0.665765	0.80373	0.799977	0.86608	0.860911
MAL8P1.60	0.914	0.922884	0.628807	0.608471	0.801289	0.707723	0.482	0.663117	0.498454	0.545685	0.445	0.582094	0.676345	0.61	0.838442	0.386648	0.59515	0.751	0.540369	0.723	0.649324	1.12615	1.37489	1.21634	1.48444	1.336	1.72325	1.77231	1.612	1.14422	1.05614	0.914639	1.20614	1.11829	1.32961	0.925662	0.732626	0.986231	0.971272	0.805514	0.962696	0.991733	0.762396	1.12318	1.07379	1.01036
MAL8P1.61	0.895	0.924046	0.555027	0.719792	0.513896	0.677283	0.369	0.472471	0.477631	0.374581	0.389	0.242647	0.316102	0.361	0.462153	0.253482	0.189615	0.556	0.447923	0.656	0.588944	0.797845	0.828183	0.969236	1.28936	1.652	1.36046	1.4944	1.803	1.46394	2.25015	1.57677	2.4498	1.98341	1.94826	1.25436	1.14604	1.1249	0.90417	1.10009	1.0501	1.16427	0.963328	1.08994	1.10148	0.743281
MAL8P1.62	1.077	1.00192	0.612878	0.697022	0.529727	0.608794	0.415	0.474839	0.458109	0.450113	0.416	0.400109	0.595184	0.391	0.486566	0.432205	0.613782	0.558	0.646469	0.76	0.645608	0.709923	0.819161	0.703736	0.684432	0.775	0.887836	1.08651	1.067	1.10435	1.47915	1.73469	2.09969	2.26255	2.17314	1.78906	2.17302	2.3287	1.65366	1.98772	1.42766	1.37236	1.33075	1.32145	1.14554	0.973994
MAL8P1.63	0.501	0.439358	0.40076	0.45161	0.420129	0.499718	0.572	0.526941	0.69237	1.23165	1.553	1.25583	1.5976	2.007	2.18281	2.02552	2.76092	2.642	3.10322	2.342	1.56061	1.9268	1.48947	1.66977	1.15165	0.881	0.859545	0.618559	0.619	0.517571	0.574027	0.523121	0.620384	0.697048	0.708995	0.515477	0.42911	0.713672	0.479949	0.319338	0.647058	0.599255	0.509795	0.496261	0.388981	0.691002
MAL8P1.64	1.3795	1.64643	1.81851	1.84755	1.75054	1.6076	1.2835	2.06632	1.25264	1.9677	1.5005	1.58753	1.75423	1.2105	1.05394	1.12957	1.32018	0.912	1.17656	0.977	0.992565	1.05366	1.16243	0.957641	1.01189	0.81	0.862873	0.737788	0.766	0.539763	0.466632	0.396042	0.508811	0.557531	0.658423	0.470155	0.392478	0.625808	0.569798	0.644542	0.870433	1.06878	0.992607	1.32432	1.46592	1.07628
MAL8P1.65	1.222	1.35701	1.50201	1.41175	1.4808	1.61394	1.1305	1.41741	0.976736	1.35574	1.0915	1.24808	1.36835	0.8535	0.838442	0.702625	0.837375	0.7325	0.769841	0.7055	0.836969	0.938146	1.11823	1.03801	1.21927	1.118	1.20153	1.27522	1.2325	1.00204	0.948739	0.850894	0.903164	0.783775	0.758095	0.611156	0.440884	0.479368	0.452085	0.493997	0.701081	0.76586	0.821527	1.1226	1.07945	1.09787
MAL8P1.67	1.184	1.66212	1.29199	2.10119	2.03123	1.5613	1.285	1.66135	2.12136	1.88678	1.92	1.80049	2.28391	1.499	1.89491	1.70662	1.65173	1.734	1.52406	1.522	1.38318	1.48813	1.24137	1.10279	0.922959	0.95	0.803795	0.670554	0.727	0.516818	0.5684	0.48035	0.389544	0.318897	0.394759	0.309469	0.382012	0.393297	0.392376	0.440556	0.679836	0.767836	0.912808	1.0269	1.1468	1.1081
MAL8P1.68	1.887	1.91667	1.42781	1.09424	0.88775	1.06919	0.833	1.14032	0.952659	0.92489	1.034	0.818288	0.711942	0.86	0.851911	0.597494	0.517331	0.767	0.733652	0.627	0.654898	0.586458	0.485362	0.468624	0.450004	0.581	0.470129	0.415062	0.642	0.45814	0.567462	0.790439	0.873347	0.971773	0.974132	0.852414	1.03876	1.47755	1.21921	1.44419	1.76272	1.80303	1.97488	2.14779	2.98093	2.41737
MAL8P1.69	1.31	1.54938	1.06394	1.40796	0.893839	0.928411	0.875	0.869157	1.20904	0.964969	0.764	0.85959	0.992447	0.631	0.816555	0.866746	0.841759	0.831	0.91213	1.089	1.38783	1.12054	1.34692	1.09159	1.0287	1.387	1.40123	1.22277	1.654	1.37818	1.97345	1.59733	1.40909	1.37578	1.66545	0.985175	1.10548	0.987426	0.832519	0.827672	1.2322	1.07866	1.34338	1.18965	1.55466	1.18425
MAL8P1.70	3.86	3.22079	1.40182	1.45983	1.09477	1.03241	0.866	0.840738	0.68326	0.47786	0.431	0.4014	0.333189	0.219	0.212978	0.100458	0.0843951	0.166	0.0567511	0.078	0.0575939	0.0626678	0.0685642	0.0527802	0.0418036	0.089	0.0490931	0.0968179	0.173	0.341536	0.754114	1.11616	1.71688	2.53286	1.78918	1.76526	3.45512	4.01545	4.83361	6.57446	4.88754	4.89018	3.21607	2.53288	3.18738	1.88775
MAL8P1.73	1.251	1.02633	0.744508	0.975325	0.729441	0.610062	0.513	0.492601	0.478932	0.303672	0.204	0.211671	0.162323	0.143	0.131322	0.0887772	0.108508	0.077	0.0674434	0.057	0.0594517	0.0636031	0.0478145	0.0783706	0.12869	0.282	0.448494	0.749442	0.934	1.62944	2.2464	2.40093	2.57868	3.96143	4.36199	4.22087	5.25528	4.56774	2.80463	2.81018	1.82585	1.42899	1.49379	0.919171	1.31297	1.12742
MAL8P1.74	0.652	0.333586	0.586887	0.266918	0.252077	0.329763	0.368	0.312612	0.346185	0.36379	0.511	0.309762	0.66353	0.542	0.760154	0.892444	0.987532	1.157	1.34722	1.798	1.61541	1.76592	2.42501	2.42309	2.55822	2.224	1.78233	1.68804	1.717	1.1871	1.53918	0.870223	1.05994	0.743374	0.655968	0.854245	1.73083	0.597715	0.434457	0.418398	0.421256	0.45438	0.496016	0.428641	0.434299	1.05241
MAL8P1.75	0.396	0.521883	0.549159	0.571786	0.561389	0.589769	0.443	0.523389	0.257686	0.473236	0.695	0.524014	1.23593	1.062	1.07667	1.44263	1.65612	1.328	1.82673	2.032	1.66929	3.15958	2.24006	1.79933	2.40904	1.699	1.76236	1.25056	1.109	0.69511	0.801012	0.425241	0.614613	0.599009	0.599013	0.67479	0.839904	0.62282	0.423083	0.655621	0.606997	0.571597	0.406458	0.734649	0.623124	0.581896
MAL8P1.78	1.384	0.944968	0.804874	0.97406	1.13496	1.10471	0.902	0.802846	0.668944	0.738371	1.037	0.776986	0.936916	0.968	1.21557	0.688023	0.869769	0.933	1.08146	0.769	0.691126	1.23371	1.19807	0.999625	1.00329	0.898	1.04926	1.26222	1.166	0.506286	1.01299	0.602905	0.730034	1.04611	0.969222	0.85333	0.981196	1.08426	0.959899	1.36468	1.07681	1.17085	1.14819	1.68706	2.64733	0.954673
MAL8P1.79	0.703	0.597434	0.475378	0.547751	0.377507	0.30186	0.192	0.169332	0.204327	0.135651	0.13	0.0645338	0.0754659	0.1479	0.102701	0.0960195	0.145883	0.243	0.201508	0.256	0.294472	0.275925	0.614371	0.618968	0.683612	1.077	1.14661	1.55536	1.955	1.86491	2.33925	1.89508	2.31514	2.3217	2.29098	2.18826	1.55029	1.51939	1.20556	1.08836	0.701688	0.808664	0.877214	0.836652	0.79055	0.646678
MAL8P1.8	0.916	1.07515	0.809904	1.1246	0.655157	0.435034	0.424	0.504443	0.364405	0.391537	0.391	0.318797	0.430013	0.267	0.429323	0.249978	0.234553	0.383	0.366004	0.316	0.227589	0.34514	0.564752	0.551793	0.819679	1.041	1.15826	1.46482	1.969	2.06426	1.56638	1.71906	2.1295	2.30123	2.49916	1.96119	1.56991	1.54928	1.3227	1.52761	1.08531	1.45928	1.06207	0.914587	1.24877	1.06719
MAL8P1.80	0.335	0.396352	0.394053	0.350409	0.614971	0.604989	0.377	0.761401	0.353994	0.866314	0.619	0.709871	1.13341	0.799	0.696176	1.03145	1.55966	1.209	1.16874	1.898	1.64607	3.96491	2.24548	2.74457	3.21478	2.01	2.20253	2.06724	1.596	0.636431	0.709092	0.531346	0.69156	0.521439	0.546967	0.413847	0.483664	0.420792	0.196757	0.263291	0.393334	0.376674	0.368568	0.675052	0.528712	0.534162
MAL8P1.81	1.785	1.71791	1.57789	1.87348	1.30788	1.26959	1.306	1.44465	1.93785	1.45824	1.158	1.0519	1.10493	0.694	0.690283	0.533831	0.375942	0.406	0.273886	0.214	0.137482	0.173038	0.276963	0.2671	0.38279	0.518	0.600766	0.866879	1.144	1.05921	1.48666	1.50356	1.75727	2.32816	2.09654	1.74878	1.94015	1.49429	1.43644	1.6019	1.19336	1.29202	1.17	1.36271	1.532	1.15584
MAL8P1.82	0.795	0.667173	0.621262	0.470585	0.529727	0.49845	0.343	0.517468	0.301936	0.564183	0.437	0.504654	0.750387	0.555	0.476464	0.557194	0.585285	0.546	0.467991	0.474	0.427309	0.631355	0.812846	0.82609	1.13198	0.968	1.31386	1.49351	1.594	1.26534	1.42756	1.28066	2.19876	2.37772	2.3823	2.15988	1.44432	1.78836	1.18054	1.23695	0.830371	1.17217	0.80373	1.09567	0.916433	0.812609
MAL8P1.84	0.554	0.64567	0.645156	0.593291	0.465795	0.395716	0.243	0.425698	0.38653	0.392308	0.2225	0.27814	0.34814	0.208	0.24665	0.24881	0.280586	0.22	0.271418	0.271	0.297723	0.44148	0.796156	0.90606	1.23403	1.454	1.70827	1.81534	2.315	1.99882	1.93969	1.98021	2.18577	1.93008	1.799	1.46815	0.838595	0.870871	0.614153	0.695375	0.705937	0.621644	0.69006	0.649265	0.67096	0.609741
MAL8P1.85	0.415	0.450981	0.314404	0.399744	0.351934	0.252396	0.191	0.149201	0.114527	0.115611	0.222	0.156172	0.219278	0.192	0.494142	0.252314	0.505274	0.615	0.565866	1.082	1.05248	1.33192	2.09391	1.89289	1.98444	2.033	1.86803	2.16137	2.202	1.82203	1.94907	1.34235	1.23404	1.01271	0.98788	0.733388	0.694687	0.634774	0.512932	0.538313	0.529301	0.530768	0.513239	0.754133	0.576547	0.422784
MAL8P1.86	0.469	0.407975	0.265776	0.259328	0.157092	0.156003	0.1706	0.140912	0.180901	0.331419	0.481	0.441411	0.901319	0.862	1.45296	1.29661	1.87532	1.975	2.21412	3.018	2.02693	2.38512	2.66498	2.30713	2.14182	2.392	1.9762	1.64411	1.457	1.34283	0.983913	0.779746	0.672323	0.678733	0.593121	0.537451	0.434343	0.38732	0.326411	0.427522	0.39819	0.447795	0.376605	0.332369	0.321003	0.294358
MAL8P1.88	2.018	2.02651	1.65963	1.84565	1.49785	0.988656	1.429	1.66253	1.45957	1.33955	0.974	1.05061	0.954714	0.35	0.508874	0.402418	0.381422	0.484	0.338451	0.214	0.224802	0.185665	0.154269	0.139548	0.104919	0.109	0.0865369	0.0578218	0.081	0.0695862	0.107396	0.152577	0.1991	0.426632	0.463007	0.456879	1.07408	1.3335	1.80095	2.19757	3.94426	4.02818	4.34416	6.2365	6.61204	5.11262
MAL8P1.9	0.55	0.60557	0.66989	0.842499	0.746489	0.843433	0.785	1.08704	0.92663	1.50295	1.278	1.31649	1.63035	1	1.05815	1.15878	1.15303	1.128	1.04866	1.387	1.1268	1.4133	1.40557	1.25313	1.46149	1.312	1.40206	1.26491	1.572	1.05094	1.11429	0.847192	1.01474	0.954536	1.00752	0.816706	0.455275	0.58337	0.344608	0.421005	0.424897	0.612425	0.512091	0.757571	0.784255	0.70123
MAL8P1.91	1.2645	0.916491	1.11844	0.828584	0.692299	0.801579	0.81	0.811727	0.703432	0.649736	0.5225	0.558217	0.523277	0.284	0.404068	0.216686	0.2214	0.4	0.24551	0.2325	0.221551	0.189406	0.313952	0.369861	0.365167	0.5825	0.643202	0.803678	0.9495	1.03589	1.21887	1.1799	1.54759	1.87083	1.99098	1.59358	1.64775	1.62937	1.64343	2.06918	2.17487	2.24819	2.59146	3.17928	3.40704	2.54409
MAL8P1.92	2.264	2.03988	2.50349	2.38708	2.17493	2.54933	1.945	2.09948	1.75825	2.06867	1.78	1.52945	1.82542	1.303	1.28123	1.28727	1.50706	1.241	1.23865	1.074	1.11193	1.10651	0.861563	0.819693	0.738531	0.728	0.540024	0.494847	0.451	0.358839	0.310462	0.291994	0.283742	0.301659	0.369227	0.47336	0.521996	0.656292	0.689217	1.12876	1.57455	1.84649	2.08281	2.41483	2.68132	2.28553
MAL8P1.95	1.485	1.26344	1.3817	1.19797	1.18245	1.2772	1.099	1.89699	1.54091	2.59123	1.785	1.86373	2.99016	2.513	2.36212	2.86306	2.5198	2.784	2.4954	2.932	1.93311	2.41505	2.00731	1.31311	1.09919	0.948	0.774672	0.447335	0.313	0.280602	0.315152	0.287881	0.276047	0.289808	0.398687	0.342431	0.371546	0.445896	0.487911	0.802907	1.00154	1.17217	1.18837	1.09796	1.4036	1.2729
MAL8P1.96	0.555	0.53583	0.614555	0.460465	0.412822	0.445181	0.258	0.374188	0.363104	0.480943	0.343	0.446574	0.627933	0.56	0.634724	0.734748	0.871352	0.808	0.995201	1.166	1.28657	1.14205	1.48947	1.3227	1.49346	1.472	1.42037	1.68535	1.949	1.57227	1.43976	1.35551	1.56202	1.31545	1.25498	1.03187	0.659364	0.84517	0.493597	0.595663	0.528087	0.591352	0.63954	0.819461	0.735161	0.725097
MAL8P1.98	0.847	0.739237	0.788776	0.722955	0.722743	0.72865	0.548	0.822384	0.585651	0.721414	0.872	0.614361	0.725469	0.6685	1.25345	0.585813	0.6642	1.208	1.07375	0.9465	1.05991	1.11352	1.32121	1.26313	1.28157	1.556	1.41871	1.55523	1.519	1.25218	1.28312	0.903535	0.911821	0.850032	0.837145	0.726978	0.469666	0.864894	0.496441	0.606742	0.908067	0.638766	0.851954	0.94897	0.978746	0.595534
MAL8P1.99	0.398	0.283607	0.283383	0.296013	0.213109	0.175028	0.232	0.233275	0.309744	0.260511	0.274	0.320087	0.482697	0.476	0.753419	0.655316	0.813262	1.13	1.25181	1.564	1.59126	1.53676	2.12549	1.6018	1.791	1.82	1.84057	1.8494	1.75	1.67759	1.3741	1.18442	1.01474	0.873734	0.741401	0.644575	0.528537	0.504472	0.336647	0.419702	0.469451	0.333212	0.36742	0.385089	0.419193	0.437559
PF00_0003	0.652	0.639277	0.70678	0.511065	0.440831	0.525085	0.283	0.444052	0.292826	0.308297	0.324	0.233612	0.336037	0.243	0.30726	0.25465	0.380326	0.4	0.365181	0.519	0.586157	0.846483	1.13582	1.20195	1.42378	1.321	1.50524	1.66383	1.745	1.34659	1.45758	1.57183	2.08045	2.02327	2.03664	2.00423	1.24546	1.24803	0.61984	0.89154	0.843725	0.848176	0.718764	0.821753	0.827056	0.723961
PF07_0003	2.712	2.11775	1.41775	1.81403	2.66081	2.47069	1.391	2.7922	1.39775	2.118	1.1	1.67401	1.48938	1.329	1.0994	0.570043	0.37923	0.829	1.26826	0.707	0.533208	0.344205	0.638729	0.603773	0.414758	0.567	0.63821	0.421337	0.665	0.521633	0.540261	0.356972	0.379925	0.758457	0.698193	0.846005	0.442192	0.802134	0.929191	1.98902	1.80885	2.31141	2.66953	2.71052	3.28556	2.32645
PF07_0004	3.317	2.93138	3.29747	1.94686	2.74606	2.19546	1.546	1.97514	0.99821	1.36884	0.775	0.966716	0.979632	0.369	0.360294	0.343428	0.267434	0.31	0.161206	0.143	0.142127	0.129077	0.0866074	0.0927652	0.0811482	0.119	0.0457647	0.0412373	0.058	0.0624395	0.130375	0.176841	0.347223	0.623788	0.67168	0.76818	0.995587	1.57797	2.07902	3.15949	4.77342	5.91879	4.45152	6.00327	5.93542	4.54606
PF07_0005	4.125	3.89494	1.97026	3.89624	1.84369	2.50113	1.629	1.69213	1.85586	1.20236	1.249	1.19904	1.25302	0.859	0.852753	0.745261	0.697081	0.444	0.472104	0.372	0.306548	0.230094	0.147052	0.179932	0.136886	0.137	0.077384	0.0681311	0.081	0.147447	0.231674	0.462255	0.592491	0.879121	0.682482	0.586893	1.40376	1.56482	1.74579	3.21684	3.83986	3.40061	3.01858	3.11166	3.61538	2.42192
PF07_0006	2.788	4.14368	3.92711	4.67928	5.60902	4.86021	3.315	5.34994	2.46624	4.76319	2.845	2.78786	3.11831	1.763	1.16422	1.37021	0.854911	0.494	0.436737	0.285	0.229446	0.292761	0.118183	0.113557	0.116394	0.124	0.0715594	0.0493054	0.056	0.111338	0.078788	0.102815	0.136581	0.137901	0.257281	0.305807	0.35323	0.536749	0.615291	0.890237	1.49928	1.89654	2.13563	2.68073	2.75811	2.62876
PF07_0007	0.852	0.813625	1.02957	1.34724	1.38094	1.95448	1.988	2.69628	3.82886	4.46722	3.33	4.03723	4.93376	3.078	3.07597	3.41208	3.26291	2.411	2.13269	1.605	1.52159	1.04477	0.854346	0.676546	0.504103	0.547	0.420203	0.332587	0.269	0.310693	0.282324	0.205629	0.187558	0.184228	0.19247	0.17854	0.196239	0.185292	0.20358	0.282842	0.354486	0.412234	0.583279	0.645254	0.743973	1.03878
PF07_0008	0.576	0.5707	0.714325	1.1499	1.08868	1.04383	1.464	2.05803	3.35903	3.20012	2.711	3.14925	3.47997	2.963	3.11974	2.95885	2.69407	2.908	1.94188	1.54	1.33581	0.944693	0.684739	0.660552	0.501644	0.462	0.385256	0.350517	0.251	0.23396	0.245744	0.185066	0.155817	0.158371	0.16792	0.135507	0.151758	0.163774	0.154676	0.179872	0.245227	0.289749	0.452385	0.543251	0.5413	0.836476
PF07_0010	0.62	0.755509	0.781398	0.932315	0.690472	0.988022	0.688	0.716404	0.702781	0.852441	0.868	0.700836	0.727605	0.841	0.949561	0.769792	1.0796	0.897	1.34969	0.968	0.973522	1.08406	1.42812	1.46905	1.43444	1.456	1.7141	1.60556	1.623	1.47147	1.2184	0.926154	1.07341	0.915751	0.985916	0.786492	0.740476	0.594129	0.533404	0.73904	0.848581	0.796811	0.811767	0.565027	0.639489	0.409146
PF07_0011	3.41	3.20568	2.23185	2.98923	2.3515	1.79467	1.592	1.65542	1.73613	1.12528	0.903	0.971878	0.850059	0.435	0.578323	0.549017	0.43184	0.346	0.299383	0.32	0.434741	0.438674	0.727141	0.269499	0.237707	0.359	0.252122	0.312865	0.306	0.185062	0.38925	0.415371	0.661743	0.954536	1.00359	0.918337	2.13901	1.82303	2.13248	3.24161	4.51484	5.10091	3.46178	1.84522	2.56551	2.44124
PF07_0012	0.413	0.431221	0.347102	0.375709	0.261819	0.240981	0.182	0.172884	0.1796	0.192686	0.222	0.231031	0.326069	0.33	0.443633	0.367958	0.539252	0.734	0.741877	0.962	0.955872	0.79878	1.33971	1.26433	1.38772	1.803	1.70661	2.06097	2.241	2.09135	1.52605	1.41391	1.38023	1.33269	1.06153	1.13167	0.719544	0.726822	0.518618	0.578719	0.522017	0.429356	0.662503	0.639523	0.653336	0.583033
PF07_0013	0.924	0.963565	0.910513	0.772923	0.596704	0.829482	0.527	0.766137	0.560924	0.621218	0.628	0.543374	0.753235	0.676	0.787091	0.566539	0.598438	0.779	0.966414	1.192	1.21319	1.00736	1.32708	1.21874	1.31804	1.241	1.10085	1.15733	1.168	0.970445	0.799136	0.700784	0.961836	0.938375	0.936817	0.864317	0.664597	1.06872	1.08955	1.13789	0.979692	0.928515	1.05863	1.06014	1.01336	1.1297
PF07_0014	1.426	1.82252	1.17629	1.27766	1.28352	0.748309	0.669	1.06099	0.754839	0.9141	0.929	0.801509	0.868569	0.94	0.557278	0.480098	0.602822	0.667	0.766551	0.328	0.405015	0.440545	0.60986	0.786105	0.546726	0.567	0.605759	0.702826	0.689	0.622138	0.783191	0.765763	0.939714	1.30468	1.18428	1.32944	1.55552	1.63654	2.01533	2.14022	2.51054	3.05686	2.0564	2.01026	1.85678	1.35245
PF07_0015	0.4925	0.629979	0.811581	0.945597	1.0558	1.27403	1.161	1.82298	1.34309	2.21511	2.4015	2.30579	2.75949	1.9845	2.24047	2.05005	2.05069	2.6045	2.53982	1.8765	1.58894	1.5087	1.41639	1.37708	1.32419	1.019	0.934433	0.793369	0.653	0.473562	0.328753	0.320782	0.303459	0.30112	0.374628	0.337853	0.296975	0.360422	0.304233	0.363003	0.519589	0.503769	0.525869	0.626916	0.70369	0.693275
PF07_0018	0.872	0.795028	1.23749	1.18658	0.864612	1.14022	0.718	0.898761	0.927932	1.12066	0.984	0.9551	1.05937	0.842	0.741634	0.886604	0.934922	0.833	0.810965	1.016	0.821177	1.11305	1.26393	1.17556	1.25657	1.25	1.32302	1.45765	1.479	1.50306	1.08896	1.04213	1.30233	1.02995	0.972168	0.897278	0.629274	0.631188	0.410573	0.580022	0.622778	0.707252	0.773877	1.00971	1.08386	0.973994
PF07_0019	1.8365	1.43954	0.883684	0.903852	0.630193	0.610697	0.536	0.4778	0.450951	0.34298	0.361	0.217479	0.226398	0.2585	0.293791	0.168793	0.21318	0.403	0.413296	0.4165	0.385043	0.42558	0.591366	0.574185	0.583611	0.7025	0.747213	0.921563	0.9715	1.16792	1.83135	1.67793	2.0867	2.50593	2.73091	2.16674	3.04825	2.72379	2.34572	2.85905	2.37093	2.19814	1.55981	1.04123	1.28338	1.01207
PF07_0020	0.704	0.796191	1.06478	1.69765	1.18732	1.48267	1.209	1.70279	1.34439	1.8914	1.637	1.41071	2.10023	1.183	1.42013	0.87025	1.14865	1.246	1.00425	1.31	0.918715	0.845547	1.39203	0.990029	1.07706	1.266	1.01598	1.22188	1.088	0.878667	0.515874	0.517363	0.482842	0.432019	0.481174	0.426665	0.351922	0.454264	0.307077	0.415791	0.546297	0.629547	0.870325	1.26988	1.32178	1.02741
PF07_0021	0.775	0.924046	0.634676	0.565461	0.557736	0.545378	0.387	0.440499	0.219945	0.354541	0.348	0.154881	0.187953	0.253	0.363661	0.151596	0.166598	0.468	0.148046	0.186	0.170924	0.213258	0.360864	0.658953	0.771318	1.019	1.16575	1.50695	1.702	1.55422	2.26703	1.91564	2.93071	3.08231	3.30243	1.94014	1.43124	1.36638	0.82797	0.974959	1.03554	1.19456	1.03566	0.893957	0.872374	0.762602
PF07_0023	0.602	0.499798	0.517299	0.483235	0.355587	0.333568	0.348	0.350505	0.348788	0.32217	0.228	0.227159	0.296168	0.249	0.324938	0.332914	0.486642	0.496	0.4976	0.546	0.716207	0.67438	1.27114	1.04601	1.29591	1.379	1.6933	1.98566	2.088	1.99505	1.88622	1.80954	1.91021	2.01034	1.76267	1.30655	1.15389	1.05198	0.74722	1.03101	0.666482	0.755983	0.692356	0.78164	0.793067	0.72737
PF07_0024	1.715	1.83104	1.79476	1.84734	1.74181	1.71646	1.42533	1.86975	1.21035	2.0327	1.348	1.28078	1.50884	0.933333	0.890073	0.675174	0.693793	0.672	0.520904	0.397	0.341538	0.418409	0.495286	0.548861	0.602737	0.619667	0.699784	0.801138	0.821667	0.999533	0.714095	1.01389	1.25039	1.52194	1.52208	1.45762	1.12728	1.45006	1.17826	1.31081	1.39933	1.46762	1.57148	1.62135	1.61467	1.44944
PF07_0026	1.345	1.20649	1.37835	0.896894	1.56361	1.54101	1.008	1.3961	1.01903	1.29793	1.112	1.28035	1.01238	0.968	1.04805	0.867914	0.865872	0.803	0.807675	0.814	0.785877	1.00643	0.602643	0.861277	0.684432	0.726	0.765519	0.654417	0.728	0.609349	0.970781	0.701607	1.07533	1.32191	1.23534	1.22964	1.58038	1.50744	1.30337	1.54977	1.39488	1.76352	0.8864	0.71975	0.969305	0.761466
PF07_0027	1.969	1.66328	2.28718	2.46298	1.96425	2.12571	2.203	2.42748	3.2419	2.3523	2.252	2.29869	2.38785	1.943	1.87808	1.91338	1.6616	1.58	1.16874	1.485	1.294	1.28235	0.995985	0.918855	0.736072	1.098	0.581628	0.484986	0.471	0.388178	0.432396	0.34299	0.283742	0.239173	0.259245	0.290242	0.319216	0.33233	0.404886	0.559168	0.872861	0.915345	1.02992	1.27905	1.425	1.15697
PF07_0028	1.307	1.36863	1.71832	1.08285	1.27135	1.30383	1.504	1.81943	1.30275	1.56538	1.331	1.42232	1.53495	1.224	1.20547	0.861489	0.996848	1.374	1.06429	0.8275	0.789593	0.800651	0.897198	0.858878	0.81681	0.8425	0.741805	0.645004	0.7285	0.515314	0.480232	0.528878	0.591529	0.758457	0.690829	0.747579	0.690108	0.982047	1.00596	1.25128	1.33479	1.66013	1.42777	2.30882	2.16142	1.31552
PF07_0029	1.756	1.96549	1.58795	1.90258	1.31031	1.4294	1.22	1.56425	1.57085	2.12879	1.635	2.0767	2.4505	1.764	1.90165	2.03487	2.34114	2.249	1.94846	1.921	1.70645	1.73225	1.72132	1.21954	1.19099	1.181	0.854552	0.884808	0.782	0.678559	0.498053	0.449094	0.416475	0.372764	0.430111	0.469698	0.472282	0.518817	0.568661	1.08575	0.972408	0.989099	1.22167	1.50139	2.00533	1.29108
PF07_0032	1.059	0.980419	0.75918	0.724852	0.663681	0.730553	0.411	0.682063	0.841385	0.621218	0.3845	0.558217	0.649291	0.3725	0.497088	0.49762	0.60885	0.6175	0.546949	0.7485	0.717601	0.743595	1.33475	0.908059	1.06025	1.2875	1.14537	1.53967	1.74	1.3526	1.70707	1.43241	1.54086	1.44743	1.43272	1.14632	1.37237	1.17272	1.06851	1.21283	1.24738	1.20048	1.03394	1.1461	1.00959	0.89046
PF07_0033	0.846	1.05888	1.14527	0.98418	1.14713	1.20744	0.947	1.82002	0.976085	2.09334	1.441	1.77984	2.68402	1.48	1.61206	2.02202	2.35429	1.644	1.31761	1.631	1.66558	1.69109	1.36046	1.46665	1.54509	1.001	1.32302	1.06948	0.839	0.72821	0.498991	0.456497	0.491498	0.415859	0.467426	0.399197	0.252494	0.351457	0.305939	0.428826	0.485597	0.630864	0.648725	0.774763	0.951681	0.988769
PF07_0034	0.905	0.994948	1.53178	1.02972	0.842693	1.63106	1.134	1.34755	1.12315	1.4305	1.403	0.78344	0.831548	0.764	0.585899	0.502292	0.843512	0.887	0.861137	1.201	1.20111	1.12802	1.669	1.55222	1.70493	1.611	1.74738	1.57598	1.736	0.986995	1.49228	1.13014	1.15324	0.829563	0.751221	0.531958	0.550778	0.579784	0.387826	0.452287	0.579075	0.578182	0.638391	1.10942	1.02218	1.05241
PF07_0035	0.561	0.556752	0.561735	0.583171	0.478581	0.358935	0.365	0.479576	0.361802	0.408493	0.433	0.353645	0.474153	0.513	0.488249	0.490611	0.6642	0.717	0.795338	0.79	0.74036	0.816552	1.16288	0.974035	1.05575	1.491	1.27392	1.75527	1.83	1.68662	1.28969	1.26832	1.31868	1.30037	1.28051	0.840512	0.745709	0.833215	0.553875	0.577415	0.534157	0.613742	0.583279	0.78164	0.672219	0.6785
PF07_0036	0.667	0.726451	0.804035	0.889304	0.737965	0.810457	0.802	0.811135	0.916219	0.907934	1.077	0.709871	0.800223	0.759	1.23998	0.636626	0.850417	0.749	0.804385	1.093	0.887131	0.988654	1.49217	1.62019	1.41313	1.51	1.42203	1.46572	1.555	1.60688	1.82713	1.22555	1.29559	1.12153	1.20883	0.715991	0.559936	0.539139	0.454928	0.230706	0.547511	0.534719	0.50635	0.488238	0.395275	0.477337
PF07_0037	0.808	0.682283	0.809485	0.99683	0.794591	0.974705	0.98	1.16164	1.23377	1.31412	1.2385	1.30616	1.23237	1.047	1.19705	0.959027	0.91903	1.1695	1.15929	1.067	1.03762	0.949838	1.36858	1.09879	0.958205	1.0475	0.974373	1.00852	0.9155	0.894841	0.931387	0.814292	0.864691	0.968541	0.842055	1.11198	1.00867	0.982644	0.831382	0.894147	0.952377	0.970002	0.970791	1.0441	0.957346	0.963766
PF07_0038	0.482	0.512584	0.479571	0.345349	0.396991	0.428692	0.228	0.299587	0.183504	0.282092	0.186	0.233612	0.377329	0.353	0.308944	0.439213	0.613782	0.638	0.704865	0.837	1.11379	1.35531	1.61487	1.74974	2.12953	1.627	2.35314	2.23488	2.108	1.63396	1.67894	1.13178	1.64378	1.62573	1.46316	1.06025	0.63189	0.711281	0.502696	0.79639	0.524445	0.634815	0.496016	0.598264	0.610536	0.620538
PF07_0039	0.456	0.503285	0.441004	0.537631	0.348281	0.341178	0.197	0.268799	0.264194	0.237389	0.236	0.212961	0.36309	0.498	0.601893	0.539672	0.759556	0.828	0.981219	1.335	1.47607	1.23745	1.70508	1.73855	1.72297	1.921	1.49692	1.70507	1.613	1.51886	1.75397	1.34646	1.31579	0.910364	1.06447	0.763602	0.546853	0.705304	0.482224	0.658228	0.640988	0.568963	0.585575	0.58451	0.639489	0.400054
PF07_0040	1.101	1.00425	1.10419	1.32447	0.999784	0.866263	0.864	0.931917	1.23117	0.931056	0.757	0.684058	0.670649	0.495	0.472255	0.40417	0.367173	0.379	0.408773	0.477	0.515558	0.477959	0.804727	0.706935	0.863122	1.26	1.17823	1.27298	1.619	1.40752	1.91061	1.622	1.72553	1.91554	1.84614	1.46861	1.44955	1.16674	0.677843	0.874595	0.864363	0.903491	0.951846	0.930632	1.02469	0.881936
PF07_0042	0.4235	0.477133	0.391537	0.402274	0.337321	0.390009	0.3155	0.41504	0.277208	0.461674	0.3955	0.387848	0.610134	0.471	0.667555	0.597494	0.795177	0.8	0.711445	0.899	0.81003	1.04945	1.22784	1.3339	1.71477	1.6615	1.8023	1.86285	1.811	1.71182	1.02518	1.20745	1.33888	1.3914	1.36742	1.19759	0.749634	0.730408	0.569798	0.582629	0.540834	0.549207	0.566056	0.6464	0.578436	0.52848
PF07_0043	0.818	0.901962	0.988485	1.30296	1.18123	1.46111	1.419	2.23565	2.31527	2.70376	2.144	2.55683	2.67975	1.766	1.9168	1.97529	1.62324	1.315	1.64249	1.707	1.71853	1.3815	1.30272	1.18835	1.12624	0.937	0.854552	0.80323	0.774	0.472434	0.703465	0.374245	0.410704	0.317819	0.303434	0.265521	0.247261	0.249845	0.2377	0.367565	0.360556	0.54789	0.512091	0.705997	0.687325	0.719415
PF07_0044	1.432	2.04336	2.15723	2.25805	3.14548	3.24437	1.881	3.28717	1.51228	3.13538	2.118	2.68331	2.62564	1.636	1.23998	2.00566	2.11097	1.205	1.33406	1.111	1.29307	1.45352	0.820966	1.14517	1.06066	0.625	0.63405	0.536981	0.486	0.318216	0.437086	0.375068	0.353956	0.274725	0.380029	0.248125	0.312544	0.386124	0.300253	0.417095	0.599712	0.881102	0.802582	1.38334	1.20597	1.28313
PF07_0046	0.681	0.786892	1.17545	1.07147	1.31762	1.56257	1.178	1.27058	1.3483	1.69872	2.558	1.37328	1.59902	1.279	1.32837	1.11322	1.22208	1.295	1.2148	1.417	1.25034	1.34221	1.47233	1.38588	1.36067	1.447	1.4445	1.32676	1.312	1.14949	0.99423	0.699139	0.755041	0.655031	0.659896	0.541114	0.419952	0.560657	0.305939	0.462714	0.781811	0.727008	0.74058	0.90198	0.858527	0.806926
PF07_0047	0.513	0.448656	0.394053	0.352939	0.272779	0.466742	0.399	0.525757	0.318855	0.679794	0.565	0.694383	0.992447	0.885	1.07667	1.11556	1.42814	1.278	1.76011	1.355	1.94983	1.79866	1.69877	1.8729	2.05903	1.145	1.47778	1.43434	0.974	0.971197	0.799136	0.546974	0.622308	0.585003	0.595085	0.544776	0.629274	0.545117	0.487911	0.672565	0.810947	0.871882	0.871473	1.00398	0.794326	0.850114
PF07_0053	0.59	0.782243	0.923928	0.949392	1.18976	1.25056	0.866	1.75608	0.72881	2.00393	1.3235	1.68498	2.52526	1.305	1.28039	1.63771	1.97178	1.435	1.43523	1.2415	1.17231	1.57885	1.28513	1.36909	1.64755	1.0345	1.25895	1.14164	0.9525	0.740623	0.52244	0.517363	0.771873	0.719134	0.741401	0.518682	0.316599	0.427964	0.271251	0.357789	0.461924	0.575548	0.635521	0.991376	0.856639	1.04559
PF07_0054	1.602	1.97827	1.21486	1.63313	1.04362	0.849775	0.804	0.988755	1.25199	0.890978	0.585	0.747301	0.61939	0.508	0.549701	0.41001	0.434032	0.523	0.441672	0.496	0.529492	0.546239	0.774955	0.687742	0.863122	0.945	1.0917	1.30704	1.398	1.36916	2.17886	1.4978	2.11796	1.74531	2.01308	1.61052	1.86689	1.73696	1.68778	2.37092	1.31233	1.43953	1.16311	1.42804	1.532	1.2604
PF07_0056	1.603	1.39711	1.40769	1.64958	1.10086	1.22139	1.132	1.28953	1.1661	1.44437	1.175	1.16677	1.16474	0.947	0.912521	0.920479	0.904233	0.94	1.01741	0.866	0.794238	0.778203	0.849835	0.822891	0.850007	0.822	0.845399	0.854328	1.025	1.06222	0.95765	1.18278	1.17633	1.29929	1.69982	1.23055	1.34097	1.53015	1.37957	1.66577	1.3014	1.42109	1.40079	1.42002	1.65537	1.40132
PF07_0057	0.934	0.783405	0.887038	1.18785	0.986389	0.920801	0.761	0.883367	1.11924	1.08983	0.995	0.916379	1.05083	0.803	1.09772	0.974213	1.1344	1.117	1.07251	1.133	1.44635	1.09248	1.3794	1.062	1.14427	1.097	1.22317	1.24877	1.133	1.47899	1.03269	1.08161	0.951256	0.754148	0.601959	0.621686	0.629274	0.618038	0.366217	0.467928	0.530515	0.530768	0.724505	0.730065	0.73642	0.896711
PF07_0058	1.056	1.39827	1.42446	1.53699	1.65981	1.91263	1.046	1.04441	0.877175	1.16228	1.078	1.28422	1.75992	0.929	1.27282	1.15177	1.45006	1.468	1.29212	1.388	1.27635	1.14205	1.43714	1.20675	1.24591	1.155	1.13913	1.20216	1.327	1.24352	0.969843	0.921219	0.857958	0.688429	0.729617	0.583231	0.374163	0.60967	0.443555	0.561774	0.7721	0.72174	1.046	1.50368	1.37717	0.868298
PF07_0059	1.249	1.28785	1.97949	1.46995	1.98252	2.61274	2.254	2.56721	2.6081	3.04597	2.064	2.36968	1.98917	1.739	1.52115	1.62486	1.63639	1.284	1.33571	1.142	1.13516	1.39553	0.866976	1.38108	1.16067	0.973	0.619072	0.630213	0.474	0.585276	0.778501	0.535459	0.53959	0.472958	0.46448	0.40286	0.324449	0.413619	0.377591	0.437949	0.666482	0.856078	0.763544	0.420618	0.48717	0.611446
PF07_0061	0.548	0.562854	0.49026	0.386461	0.399731	0.344666	0.28275	0.310836	0.164308	0.234691	0.19375	0.143588	0.177274	0.246	0.242651	0.115936	0.16879	0.29825	0.2671	0.356	0.378772	0.558632	0.879606	1.00662	1.31149	1.2895	1.6908	1.83125	1.945	1.83444	1.4407	1.44126	1.81811	2.26541	2.23844	1.93991	1.19575	1.29136	0.885404	0.944003	0.783025	0.800762	0.73283	0.820893	0.712187	0.661736
PF07_0062	0.379	0.371943	0.360516	0.382034	0.32149	0.299324	0.215	0.326822	0.232959	0.240472	0.147	0.233612	0.271962	0.306	0.479831	0.48477	0.620359	0.853	1.03221	1.216	1.26706	1.31509	2.07767	2.03924	2.02051	2.144	1.72658	1.92829	1.842	1.78667	1.73709	1.14659	1.05994	0.906055	0.886735	0.709582	0.515455	0.631188	0.433319	0.559168	0.517161	0.393796	0.43057	0.539813	0.453181	0.403463
PF07_0063	0.444	0.586973	0.584372	0.589496	0.65881	0.682357	0.416	0.380108	0.327965	0.277467	0.616	0.36397	0.338884	0.488	0.635566	0.335251	0.693793	0.777	0.961479	1.248	1.33023	1.36747	1.881	1.75054	1.52624	1.739	1.83891	1.86554	1.959	1.46846	1.72959	1.1178	1.04455	1.03103	1.01243	0.813044	0.689454	0.904941	0.626664	0.59827	0.797593	0.624278	0.824398	0.7931	0.777961	0.473927
PF07_0064	0.43	0.403326	0.314404	0.321313	0.230157	0.190248	0.143	0.166963	0.221246	0.24972	0.248	0.281367	0.402959	0.4	0.532023	0.513973	0.6642	0.732	0.945852	1.118	1.51509	1.10651	1.87018	1.58581	1.51313	1.902	1.61425	1.8485	2.116	1.81526	2.08976	1.66889	1.38601	0.912519	0.880843	0.741628	0.60965	0.529576	0.369629	0.435343	0.381194	0.406966	0.46846	0.424057	0.445628	0.390962
PF07_0065	0.4475	0.391703	0.377704	0.294116	0.243553	0.202931	0.1265	0.195383	0.165284	0.167251	0.1015	0.141974	0.174426	0.152	0.272325	0.292614	0.403343	0.5405	0.734475	0.9185	0.897349	1.07237	1.70824	1.50863	1.82624	1.9745	1.91297	2.04662	2.372	1.82504	1.64986	1.56484	1.49469	1.14146	1.12929	0.930239	0.508914	0.595325	0.418534	0.488783	0.420649	0.424088	0.448367	0.444686	0.445628	0.385279
PF07_0066	0.817	0.942643	1.30708	1.11954	1.6038	1.67165	1.203	1.65661	1.22076	1.89448	1.426	1.4675	2.21984	1.429	1.38983	1.3375	1.74051	1.58	1.66799	1.547	1.27635	1.19443	1.21882	1.35709	1.30739	1.138	1.18572	1.07486	0.893	0.992261	0.647188	0.596325	0.556903	0.542986	0.550895	0.509068	0.340148	0.394492	0.359393	0.523975	0.615495	0.669058	0.885251	0.632647	1.0184	0.97854
PF07_0067	1.418	1.5238	1.66089	2.07083	1.90824	2.12063	1.474	2.25223	1.43419	2.10567	1.734	1.86373	2.44481	1.557	1.63732	1.64705	2.11317	1.532	1.54297	1.805	1.51045	1.26177	1.32437	1.15397	0.998369	0.813	0.719754	0.503812	0.421	0.33928	0.24293	0.236885	0.22026	0.243482	0.280849	0.302145	0.299592	0.410033	0.371904	0.556561	0.778169	0.927198	1.12522	1.88075	1.6667	1.49793
PF07_0068	0.526	0.512584	0.538259	0.485765	0.455444	0.450254	0.164	0.499706	0.507564	0.439323	0.695	0.464643	0.589488	0.739	0.784566	1.10271	1.12454	1.371	1.50267	2.215	1.70273	2.53384	1.5021	2.61902	2.29346	1.795	1.68664	1.76155	1.479	1.41805	1.66111	1.27326	1.11381	1.08705	1.00457	0.803888	0.440884	0.751926	0.381003	0.363654	0.472243	0.638766	0.450089	0.367898	0.430522	0.523934
PF07_0069	0.9435	0.668335	1.02118	0.666662	0.748925	0.846604	0.793	0.730613	1.0366	0.776137	0.924	0.904118	0.908438	0.8445	1.07499	0.88894	1.07302	1.0705	1.30857	1.0825	1.21412	1.07751	1.96761	1.42626	1.2414	1.132	1.09128	1.28373	0.9215	0.958032	1.01768	0.853361	0.949332	1.08436	1.11898	1.1042	1.24416	1.07947	0.909288	1.12485	1.12112	1.10697	1.03337	1.06645	1.05491	0.990474
PF07_0071	1.214	1.21114	1.08574	1.29537	1.1654	1.16939	1.195	1.57964	1.58126	2.08409	1.782	1.64045	1.9436	1.602	1.87639	1.54075	2.08905	1.715	1.88924	1.689	1.53274	1.31976	1.32798	1.04761	0.822138	0.849	0.644035	0.502915	0.44	0.411499	0.466163	0.502558	0.566521	0.534368	0.535183	0.587809	0.694687	0.77703	0.577759	0.682993	1.01854	1.04046	0.941512	0.821753	0.970563	0.923987
PF07_0072	1.902	1.43895	0.830026	0.824788	0.688037	0.602452	0.527	0.538783	0.482837	0.426991	0.316	0.272332	0.308983	0.151	0.188565	0.150688	0.178655	0.131	0.172721	0.222	0.184858	0.24693	0.423113	0.379858	0.436069	0.519	0.525046	0.836399	0.949	1.15099	1.39755	1.67053	2.19202	2.90131	2.30767	2.22488	2.72772	3.36872	3.27776	3.733	2.56638	2.48263	1.67635	1.8372	1.70698	1.51498
PF07_0073	0.748	0.790379	0.904225	1.30423	1.06128	1.23725	1.1225	1.37538	1.49731	1.55305	1.3885	1.31068	1.60329	1.191	1.31869	1.19966	1.21222	1.236	1.05031	1.267	1.19832	1.09435	1.13762	1.12318	1.09222	1.3535	1.36795	1.33707	1.2835	1.39849	1.32251	1.09395	1.00945	1.03857	1.04091	0.827236	0.705807	0.616842	0.495872	0.559168	0.642202	0.606498	0.788804	0.875047	0.967416	0.887619
PF07_0074	0.73	0.776431	0.65396	0.562931	0.524856	0.285372	0.691	0.815871	1.11404	0.832401	1.291	1.01189	0.757506	0.422	0.930199	0.720731	0.732155	1.167	0.852089	0.508	1.01347	0.932534	1.81064	0.810096	0.787712	1.071	0.901149	1.33214	0.629	0.634927	1.14899	0.796196	0.909897	1.14092	1.01047	0.83868	1.09763	1.08904	1.19191	0.819852	1.11445	1.88732	1.17459	1.1163	1.30416	2.07869
PF07_0075	0.545	0.528857	0.596948	0.45161	0.431088	0.662064	0.735	0.425106	0.304539	0.517939	0.867	0.518851	0.721909	1.182	1.12045	1.03612	1.18153	1.403	1.61042	2.338	1.80399	1.92774	2.45027	2.32633	1.9828	1.718	1.88967	1.59301	1.344	1.15852	0.995168	0.741088	0.742537	0.735833	0.713905	0.766349	0.423877	0.810502	0.406024	0.801604	0.922635	0.891638	0.857695	0.631157	0.647042	0.543255
PF07_0077	0.588	0.625329	0.794813	1.26754	1.03632	1.25437	1.115	1.50386	1.33659	1.66018	1.48	1.63787	1.81972	1.289	1.38898	1.35619	1.48294	1.265	1.35874	1.43	1.32466	1.15889	1.49217	1.23314	1.10739	1.169	0.987686	0.952043	0.946	0.757549	0.574965	0.491865	0.469376	0.392157	0.421273	0.439483	0.452658	0.463827	0.407161	0.421005	0.563293	0.524183	0.595908	0.872181	0.79055	0.78306
PF07_0079	0.829	0.799678	0.942373	1.19291	1.29083	1.54735	1.474	2.10421	2.74345	2.95811	2.301	2.90918	3.3746	2.094	2.2148	2.03136	2.15701	1.638	1.98547	1.79	2.00742	1.40301	1.72222	1.17716	1.21886	1.124	0.90531	0.748546	0.768	0.58001	0.740045	0.449094	0.443406	0.322129	0.32111	0.270099	0.259036	0.267777	0.263858	0.316731	0.383622	0.513647	0.465015	0.919171	0.886221	0.770558
PF07_0080	0.838	0.972864	1.03376	1.16508	1.69878	1.71477	1.188	1.93725	1.75695	2.21665	1.551	1.97344	2.17854	1.37	1.53209	1.44146	1.67694	1.102	1.11857	1.141	1.38875	1.37121	0.832694	1.12598	1.09673	0.859	0.855384	0.650831	0.534	0.679312	0.707217	0.479527	0.49246	0.385693	0.399669	0.324119	0.315291	0.317985	0.300253	0.273718	0.384836	0.543939	0.535055	0.538667	0.650819	0.6785
PF07_0081	0.632	0.80084	0.812419	0.832379	0.992478	1.25056	0.514	0.779163	0.517976	0.917183	0.72	0.929286	1.13768	0.71	0.766888	0.650643	0.842855	0.687	0.708155	0.866	0.690197	1.34502	1.2098	1.3259	1.57788	1.193	1.38792	1.70328	1.558	1.12316	1.33565	1.33001	1.65147	1.18186	1.18428	0.86157	0.525921	0.743558	0.418534	0.587843	0.600927	0.7573	0.719913	0.83436	0.905104	0.700094
PF07_0082	0.843	0.9409	0.999385	1.17899	1.27926	1.35076	1.066	1.36827	1.09322	1.67868	1.2475	1.29197	1.54705	1.0215	1.02659	1.03087	1.01603	1.023	0.989443	0.8985	0.858799	1.14813	1.2328	1.13278	1.20575	1.2325	1.24064	1.24608	1.369	1.10887	0.993292	1.06434	1.12823	1.04234	1.03551	0.835018	0.580214	0.701718	0.450948	0.649755	0.675587	0.703959	0.773877	0.906564	0.927134	0.874549
PF07_0083	1.322	1.36457	2.15136	1.7065	1.65738	1.73887	1.748	2.06514	2.64844	2.46175	2.812	2.4226	2.15718	2.186	2.25689	1.62135	1.58159	1.579	1.22303	1.268	1.21504	0.933469	1.05643	0.801299	0.814761	0.819	0.784657	0.715377	0.663	0.594304	0.653753	0.420306	0.442445	0.506356	0.576427	0.413847	0.531154	0.573807	0.608467	0.666048	0.762388	0.978563	0.919697	1.12432	1.06623	1.14106
PF07_0085	0.7545	0.628235	0.584791	0.737503	0.627148	0.710894	0.832	0.793372	0.937693	1.11526	1.107	1.22162	1.56058	1.1965	1.43528	1.15352	1.26593	1.473	1.49157	1.5055	1.35392	1.28188	1.65411	1.36749	1.28854	1.3415	1.28266	1.18826	1.058	0.816979	0.708623	0.568771	0.528529	0.578	0.533219	0.478396	0.598529	0.726224	0.529992	0.738388	1.10352	1.02795	0.740006	0.832068	0.73579	0.762602
PF07_0086	0.582667	0.678021	0.657872	0.647265	0.565854	0.52593	0.577667	0.727455	0.600835	0.94493	0.901667	0.909496	1.09829	0.897333	0.95377	0.902568	0.919212	1.069	1.07937	1.05333	0.95804	1.22031	1.20468	1.37895	1.47378	1.30633	1.37627	1.30196	1.56433	1.19663	1.05739	1.1773	1.34529	1.30503	1.33452	1.157	0.764461	0.820863	0.504591	0.595663	0.570577	0.596181	0.601267	0.725481	0.674737	0.724718
PF07_0087	0.352	0.362644	0.301828	0.298543	0.214326	0.148394	0.119	0.142097	0.157475	0.243554	0.267	0.332994	0.588064	0.532	0.775306	0.781473	1.06535	1.222	1.2732	1.609	1.36553	1.66958	2.01994	1.67617	1.91641	2.015	1.90631	1.84044	1.95	1.71069	1.87591	1.37525	1.16959	1.03965	1.11259	0.778252	0.635815	0.528381	0.395788	0.467928	0.4164	0.400381	0.350197	0.322054	0.366322	0.314815
PF07_0088	0.8	0.835709	1.00945	1.22706	1.52342	1.70209	1.328	2.34578	2.17212	2.78238	1.96	2.42647	3.0343	2.158	2.10536	2.57103	1.84902	2.048	1.67375	1.711	1.62842	1.48345	1.11417	1.20675	1.23608	1.049	1.14162	0.896462	0.69	0.738742	0.782253	0.527233	0.497269	0.4805	0.431093	0.323203	0.289126	0.260604	0.239975	0.338889	0.400618	0.446478	0.568352	0.668176	0.840903	0.891029
PF07_0090	1.296	1.17627	0.961656	1.2005	0.944985	1.11993	1.077	1.38189	1.38344	1.49986	1.598	1.44556	1.68445	1.12	1.30144	1.15177	1.25825	1.301	1.17039	1.208	1.13051	1.15795	1.23957	1.03641	0.985254	1	1.05425	0.764682	0.901	0.676302	1.02424	0.630048	0.817561	0.872657	0.825852	0.661972	0.747017	0.837997	0.860952	1.12876	1.10959	1.28017	0.835879	0.989083	1.24247	1.024
PF07_0091	1.074	1.27972	1.45436	0.930628	1.42113	1.66192	0.963333	1.25203	0.883683	1.542	1.19033	1.4903	1.56675	1.072	0.96331	0.986283	1.29004	0.878333	1.32035	1.331	1.24508	1.57542	1.51533	1.43013	1.40684	1.09067	1.15771	0.984614	1.01633	0.643202	0.874485	0.690366	0.889698	0.76959	0.865131	0.726063	0.61183	0.661472	0.531887	0.582629	0.724349	0.947832	0.742111	0.900452	0.958814	0.899363
PF07_0092	1.507	1.45174	2.02728	1.38772	1.93016	1.55242	1.583	1.65306	1.72832	1.98851	1.821	1.8818	2.36507	1.392	1.66678	1.2312	1.59912	1.427	1.2732	1.436	1.22155	1.1037	1.25761	1.062	0.963943	0.849	0.981861	0.780818	0.721	0.733476	0.626553	0.514073	0.601147	0.685197	0.752203	0.62077	0.60965	0.741167	0.631213	0.874595	0.742964	0.931149	1.08389	1.15068	1.3671	1.19221
PF07_0095	1.224	1.04958	1.37751	1.54585	1.07529	0.903045	1.737	1.36057	2.10704	1.59544	2.543	1.48299	1.53352	1.824	2.27625	1.16812	1.09604	1.631	1.73297	1.854	1.41569	1.2253	1.89995	1.42507	1.34018	2.012	1.25063	1.17705	1.207	0.944115	0.83384	0.754248	0.630003	0.499892	0.606869	0.492587	0.419952	0.633578	0.476538	0.613911	0.776956	0.856078	0.923142	1.03837	0.954198	1.59567
PF07_0096	1.486	2.0236	1.85792	2.6034	2.45988	2.69265	2.247	2.62523	2.10444	3.83213	3.201	2.93758	3.0343	1.841	1.47906	1.28493	0.989724	0.838	0.481151	0.378	0.385507	0.298373	0.331093	0.174335	0.111476	0.117	0.152272	0.245631	0.381	0.177539	0.243868	0.157101	0.213528	0.336134	0.396723	0.338768	0.36108	0.480563	0.474263	0.989297	1.09017	1.3447	1.80036	2.47214	2.27598	1.99231
PF07_0097	1.138	1.42152	1.81935	1.36748	1.89484	2.09527	1.463	2.74128	0.996908	2.70222	1.648	1.92311	2.9987	1.413	1.19453	1.59565	1.99041	1.247	1.20493	1.359	1.20668	1.47784	1.10515	1.09719	1.31313	0.778	0.877851	0.635592	0.584	0.3295	0.317966	0.322427	0.386658	0.373842	0.446805	0.420256	0.382012	0.48654	0.431045	0.638676	0.738108	1.03651	0.889844	1.93462	1.79636	1.43087
PF07_0100	0.617	0.659037	0.892907	0.571786	0.63202	0.634161	0.493	0.60391	0.533593	0.713707	1.023	0.624687	0.918405	1.157	1.36036	1.08285	1.45225	1.542	2.62289	1.848	1.50301	1.52554	2.14624	1.72895	1.75821	1.786	1.3796	1.28194	1.189	0.976463	0.759742	0.789616	0.799286	0.71644	0.697211	0.520055	0.388554	0.56783	0.464027	0.615215	0.650822	0.488623	0.595908	0.704851	0.533747	0.462562
PF07_0101	0.74	0.589878	0.660877	0.435481	0.488019	0.452791	0.354	0.351097	0.344233	0.289799	0.24125	0.352354	0.37199	0.2795	0.353981	0.281517	0.452939	0.52525	0.478272	0.524	0.630513	0.712729	0.91885	0.929651	1.11825	1.21775	1.37669	1.45922	1.5285	1.61384	1.56873	1.45771	1.92319	2.21639	2.29466	2.18345	1.66705	1.79554	1.24224	1.37544	0.991225	0.972636	0.876927	0.846967	0.94224	0.813745
PF07_0102	0.497	0.5707	0.5064	0.531305	0.735529	0.998169	0.964	1.04559	1.22726	1.62627	1.367	1.15774	1.48511	1.202	1.28628	1.20667	1.25716	1.405	1.73132	1.381	1.5541	2.06055	1.91709	1.94487	1.45329	1.575	1.50691	1.32407	1.155	0.986243	0.999858	0.808534	0.774278	0.723982	0.639274	0.390957	0.312674	0.433941	0.27182	0.367565	0.44068	0.601889	0.486831	0.41145	0.415416	0.570531
PF07_0103	2.055	2.00036	2.09183	2.67044	2.10186	2.19673	2.03	2.60274	2.75777	2.62052	1.811	1.95924	2.01337	1.512	1.54388	1.39824	1.36457	1.047	1.09554	1.306	1.24291	1.03823	0.955387	0.888467	0.886073	0.864	0.759695	0.629316	0.65	0.529607	0.761618	0.639918	0.568445	0.57423	0.665788	0.455964	0.65413	0.731604	0.743808	1.09487	1.0064	1.13266	1.18034	1.68477	1.48291	1.46724
PF07_0104	3.8425	3.96468	2.06878	1.85135	1.49602	1.01212	0.6995	0.8212	0.457459	0.495587	0.3385	0.429149	0.361667	0.155	0.137215	0.107467	0.0783669	0.153	0.0571624	0.051	0.0478401	0.0706182	0.0297713	0.0379857	0.0479512	0.068	0.0465968	0.099059	0.1995	0.338527	0.592317	0.761651	1.4793	2.07714	1.89033	1.93739	2.16648	3.80984	4.08355	6.08567	4.50209	5.69819	2.95773	3.00163	3.35858	2.08948
PF07_0105	0.56	0.571862	0.3689	0.425044	0.400644	0.344983	0.259	0.262879	0.19782	0.295965	0.308	0.327831	0.486968	0.352	0.560645	0.454399	0.65872	0.69	0.574091	0.764	0.67069	0.837129	1.10605	1.03321	1.30821	1.42	1.91213	1.79023	1.873	1.65352	1.08334	1.19347	1.41678	1.87891	1.77936	1.345	0.998203	1.03285	0.656234	0.814638	0.776956	0.791543	0.739432	0.648692	0.741455	0.618265
PF07_0106	1.419	1.40873	1.39134	1.82225	1.48385	1.83019	1.822	2.64181	2.25606	3.12459	2.3955	2.26578	2.96951	2.0145	2.15671	2.05881	2.37402	1.685	1.45209	1.495	1.26474	1.10697	0.966213	0.785705	0.700416	0.5195	0.380263	0.256836	0.252	0.247877	0.297331	0.264439	0.323177	0.340444	0.376592	0.347924	0.466395	0.517024	0.549326	0.623035	0.805484	0.875834	0.88927	1.07676	1.03162	1.14959
PF07_0107	2.5035	2.95753	3.43371	3.39846	3.03589	3.07631	2.4865	2.80285	2.58793	2.77005	2.1535	2.18189	1.81332	1.283	1.29639	1.15235	1.08015	1.0425	0.900204	0.745	0.700416	0.672042	0.640083	0.556591	0.514758	0.5195	0.413963	0.394892	0.4045	0.297152	0.365333	0.338054	0.292879	0.330748	0.413908	0.441772	0.400982	0.511644	0.558993	0.830279	1.09138	1.27951	1.59311	1.77187	1.78755	1.61272
PF07_0108	0.515	0.556752	0.487116	0.609736	0.405515	0.507328	0.326	0.285377	0.268098	0.385371	0.485	0.197473	0.334613	0.48	0.57243	0.350436	0.475681	0.758	0.872651	1.112	0.968877	1.04197	1.6708	1.37149	1.63936	1.838	1.74322	2.01973	2.095	1.81375	1.37973	1.21321	1.2148	1.14738	0.993772	0.911012	0.822896	0.695741	0.597094	0.676475	0.769672	0.69935	0.71532	0.825191	0.662148	0.594398
PF07_0111	0.468	0.534668	0.531552	0.613531	0.49563	0.582159	0.418	0.46063	0.447698	0.619677	0.616	0.64921	0.828701	0.71	0.867905	0.712554	1.17495	0.884	0.854557	1.179	1.08406	1.43294	1.42451	1.37548	1.5246	1.591	1.5535	1.69162	1.68	1.46996	1.03644	1.03966	1.06571	0.994398	0.990826	0.871642	0.627965	0.59652	0.440143	0.669958	0.71747	0.60584	0.629206	0.794247	0.708725	0.651224
PF07_0112	0.585333	0.493212	0.538539	0.598351	0.513896	0.495491	0.527333	0.611015	0.952225	0.809279	0.629333	0.735685	0.820157	0.708	0.790739	0.791986	0.781111	0.867333	0.999587	1.05067	1.27078	1.0376	1.2946	1.22327	1.41422	1.53267	1.40539	1.43852	1.428	1.43235	1.83182	1.35249	1.28245	1.20484	1.07037	0.881713	0.771874	0.62521	0.507624	0.523106	0.467387	0.48116	0.462719	0.449271	0.451503	0.511053
PF07_0113	0.675	0.851982	0.583533	0.718527	0.56626	0.812994	0.281	0.389581	0.596063	0.410035	0.403	0.484003	0.566706	0.58	0.671764	0.681015	0.930538	0.722	0.977929	1.076	1.23734	1.34128	1.85665	1.72255	1.89346	1.671	1.89799	1.6208	1.689	1.53616	1.32158	1.17867	1.58126	1.15277	1.19115	0.828609	0.6018	0.711281	0.568661	0.636069	0.872861	0.7573	0.662503	0.679637	0.488429	0.608036
PF07_0115	0.5105	0.505029	0.591917	0.712835	0.729441	0.752114	0.703	0.843106	0.921424	1.17615	1.1975	1.19	1.2459	1.2535	1.48243	1.23062	1.26209	1.5875	1.60096	1.328	1.37203	1.18321	1.49443	1.35069	1.20739	1.331	1.276	1.19902	1.1755	1.51698	0.970312	1.03843	0.868538	0.832256	0.813577	0.692186	0.491906	0.595922	0.424221	0.460759	0.492274	0.465575	0.580408	0.477923	0.428634	0.460289
PF07_0116	1.697	1.76208	2.0235	2.30232	1.83152	2.48654	2.0065	2.66017	2.05564	2.85791	1.9655	1.92182	2.16074	1.471	1.41887	1.21835	1.23524	0.9285	0.783823	0.7395	0.765905	0.78288	0.600387	0.780507	0.800826	0.783	0.745133	0.697447	0.703	0.863997	0.702996	0.770287	0.787263	0.959384	0.887717	0.86157	0.688145	0.779421	0.635194	0.776839	0.803056	1.01939	1.2056	1.20627	1.23051	1.22062
PF07_0117	0.949	0.83106	1.19557	1.21694	1.10451	1.47759	1.003	1.48491	1.39515	1.84053	1.175	1.7308	1.89661	1.205	1.17517	1.19966	1.24072	1.07	1.17779	1.107	1.37668	1.16263	1.45609	1.11638	1.11804	1.057	1.03345	1.05962	1.088	0.801934	0.931387	0.612775	0.745423	0.709976	0.588211	0.787407	0.811122	0.762685	0.483361	0.578719	0.619136	0.717788	0.611983	0.966161	0.905104	0.918305
PF07_0118	0.3975	0.506772	0.427379	0.444652	0.317045	0.287275	0.244375	0.254294	0.179274	0.256272	0.354	0.16327	0.247044	0.427	0.462364	0.338755	0.500616	0.645	0.692117	0.927	0.845793	1.32748	1.51428	1.62679	1.86805	1.9245	1.94771	2.21426	2.21575	1.45736	1.07278	1.191	1.31363	1.21014	1.13321	0.910325	0.57956	0.680798	0.4754	0.549718	0.506235	0.513318	0.547972	0.703418	0.685751	0.484156
PF07_0119	0.666	0.617774	0.719775	0.615429	0.596704	0.630356	0.5925	0.557729	0.538734	0.588076	0.7275	0.493683	0.699839	0.8985	0.738687	0.709634	0.837375	0.9935	1.25831	1.0695	1.41337	1.23512	1.92972	1.53582	1.53854	1.491	1.3484	2.47737	1.5075	1.07238	1.39052	0.941371	1.01714	1.03534	1.04925	0.686235	0.698611	0.884021	0.473694	0.805514	0.849188	0.851468	0.649299	0.983353	0.773555	0.749532
PF07_0120	0.425	0.391703	0.446873	0.398479	0.539469	0.532695	0.406	0.575491	0.31495	0.690585	0.485	0.422051	0.659258	0.609	0.677656	0.644803	0.662008	0.808	0.745989	0.837	0.745933	1.15514	1.31264	1.54822	1.75821	1.58	1.78566	1.65935	1.523	1.53842	1.11429	1.03802	1.33695	1.53738	1.24221	0.984259	0.644973	0.659878	0.493597	0.801604	0.562079	0.662473	0.637243	0.594825	0.594171	0.49893
PF07_0121	1.5335	1.54473	1.75102	1.91713	1.79986	2.11429	1.552	2.19598	1.50903	2.27215	1.816	1.6398	2.31381	1.4395	1.68909	1.41927	2.11317	1.5965	1.43317	1.7125	1.26428	1.37916	1.17506	1.08999	1.00083	0.8735	0.763023	0.515914	0.4875	0.382536	0.276696	0.288292	0.276047	0.331825	0.371191	0.346093	0.385937	0.451873	0.506108	0.606742	1.04707	1.18534	1.25956	1.5925	1.59306	1.43315
PF07_0122	1.429	1.41687	1.87133	2.19353	1.60136	1.82892	1.63	2.06751	2.54173	2.63285	2.012	2.09735	2.78227	2.02	2.12052	1.72415	1.78874	1.982	1.93859	2.03	1.63771	1.21501	1.37489	1.02122	0.850007	0.908	0.678982	0.530706	0.496	0.357334	0.27482	0.326539	0.253925	0.251023	0.277903	0.322288	0.435651	0.380147	0.420809	0.676475	0.806091	0.80603	1.01385	1.33291	1.32807	1.25017
PF07_0123	1.452	1.26693	1.20899	1.71283	1.26039	1.29876	1.04	1.28005	1.63201	1.53686	1.385	1.53719	1.89377	1.35	1.60701	1.53491	1.70215	1.51	1.48129	1.698	1.51881	1.16543	1.57517	0.98763	0.931975	0.988	0.880347	0.894669	0.749	0.725201	0.599352	0.554376	0.453025	0.472958	0.447787	0.344262	0.566477	0.597715	0.591407	0.852437	0.977264	0.961441	1.04829	1.06129	1.44137	1.1206
PF07_0125	0.8575	0.607313	0.773475	0.676782	0.901754	0.696308	0.749	0.614568	0.819261	0.630467	0.805	0.962198	0.773881	1.044	1.10361	1.06357	1.40129	1.4905	1.60795	1.6305	1.17417	1.52086	1.42857	1.24073	0.989353	1.0045	0.876187	0.802334	0.733	0.895217	0.915442	0.660892	0.748308	0.989011	0.827325	0.883544	1.32854	1.09203	1.03781	0.968442	0.974229	0.929174	0.660781	0.532363	0.552629	0.469949
PF07_0126	2.13233	1.8078	1.90962	2.56713	1.6521	1.88134	1.937	2.47051	2.15997	2.52598	1.77167	1.7166	1.98205	1.46767	1.50796	1.4329	1.47856	1.635	1.55147	1.36667	1.36553	1.26146	1.09041	0.99536	0.793996	0.830667	0.567483	0.40042	0.284	0.342038	0.327658	0.396453	0.4822	0.644976	0.565625	0.615582	0.885257	1.15359	1.22452	1.99597	1.80076	1.68977	1.84743	1.37608	1.54417	1.53354
PF07_0127	3.197	2.2735	1.54351	1.19164	1.11425	1.34315	0.716	0.738902	0.723605	0.607345	0.473	0.393656	0.334613	0.399	0.505927	0.109803	0.214057	0.528	0.183413	0.332	0.143056	0.216999	0.184943	0.171935	0.168034	0.334	0.17557	0.184671	0.344	0.535626	1.26905	1.47642	1.9381	2.27429	1.9188	2.00331	3.1045	4.6837	3.78387	4.29738	3.16974	4.53194	1.95881	0.707143	0.925245	0.702367
PF07_0128	4.052	3.54624	1.74599	1.85008	1.49359	1.16749	0.9435	1.04855	0.725557	0.702146	0.4525	0.547246	0.442116	0.167	0.157839	0.136086	0.107412	0.1165	0.0641534	0.044	0.048769	0.0519114	0.0324778	0.0299888	0.0213117	0.02	0.0203861	0.0421337	0.083	0.201988	0.439431	0.65349	1.13689	2.08899	2.22862	2.088	3.25037	4.35854	4.91436	7.73515	6.46208	6.14005	4.31316	3.54775	4.18123	3.01518
PF07_0129	0.382	0.32545	0.302666	0.246678	0.175358	0.178833	0.112	0.155122	0.154872	0.326795	0.336	0.388493	0.602303	0.549	0.757628	0.848056	1.32621	1.08	1.84318	1.848	2.12447	1.88565	2.31494	2.10081	2.09018	1.972	1.84973	1.71493	1.938	1.57679	1.38254	1.37607	1.30136	0.802629	0.836654	0.811213	0.452658	0.49969	0.379865	0.414488	0.396976	0.399064	0.415643	0.432079	0.42171	0.396644
PF07_0132	0.517	0.577674	0.850148	0.571786	0.537034	0.328495	0.4042	0.345768	0.295428	0.431616	0.765	0.462062	0.605151	1.484	0.932724	0.644803	0.812166	1.105	1.37107	1.167	1.18532	1.24026	1.57698	1.19475	1.34673	2.068	1.38542	2.24922	1.862	0.874905	1.36754	0.771521	0.929134	1.15816	1.14205	0.804804	0.567785	0.799743	0.517481	0.4953	0.480741	0.599123	0.490275	0.827483	0.613054	0.508023
PF08_0002	0.888	0.908936	1.11089	0.843764	1.3639	1.05017	1.108	1.57254	1.24288	2.13804	1.829	1.92569	2.2355	1.426	1.26692	1.64939	1.48075	1.471	1.1597	0.849	0.884344	1.00362	0.851639	0.696539	0.713121	0.683	0.676486	0.800939	0.701	0.681568	0.665009	0.716412	0.579025	0.845723	0.901465	0.866148	1.15519	0.788984	0.595956	0.869382	0.895927	0.948271	0.930031	1.04868	1.11029	0.95922
PF08_0003	3.606	4.46332	3.60349	4.32508	4.50816	3.44349	2.503	3.32388	1.89881	2.48641	1.434	1.55268	1.4666	0.554	0.607786	0.453231	0.435128	0.435	0.250034	0.187	0.150487	0.137495	0.073075	0.0599775	0.0532791	0.071	0.0349476	0.0268939	0.033	0.0481461	0.0825399	0.109395	0.184673	0.415859	0.45957	0.478854	0.697303	1.13207	1.408	2.00857	2.53725	3.22807	3.02203	4.36435	3.64182	3.32772
PF08_0006	0.369	0.414949	0.470348	0.312458	0.422564	0.365276	0.381	0.44642	0.527086	0.87248	1.181	1.35005	1.63462	1.667	1.97488	2.64346	2.81901	2.617	3.19122	2.826	2.92428	3.44205	2.2572	2.1432	1.77542	1.262	0.978533	0.840881	0.686	0.491993	0.816957	0.459787	0.504964	0.412303	0.578391	0.397366	0.354408	0.395688	0.297978	0.318035	0.444321	0.450429	0.313455	0.209736	0.235402	0.4046
PF08_0008	3.351	2.58965	1.49069	2.03035	1.65616	1.35837	0.955	0.873894	0.666341	0.428533	0.445	0.446574	0.240636	0.188	0.18604	0.107467	0.0843951	0.122	0.0904728	0.054	0.0575939	0.0682798	0.0270648	0.0463826	0.0352462	0.049	0.0341155	0.0394443	0.09	0.203116	0.55902	0.801954	1.33407	2.05344	1.89524	1.82935	2.75127	3.73094	3.22089	5.15633	5.58922	5.38144	2.82454	1.01201	1.79384	1.357
PF08_0009	0.583	0.561402	0.54832	0.503475	0.295917	0.342447	0.29	0.252221	0.208232	0.292882	0.214	0.15359	0.202192	0.325	0.359452	0.238297	0.328812	0.484	0.551062	0.702	0.70506	0.863319	1.25581	1.24513	1.39181	1.648	1.71493	1.88795	2.281	1.82203	2.22013	1.82352	1.86308	1.6839	1.81471	1.19668	1.00736	0.961127	0.648273	0.723399	0.665268	0.762568	0.780767	0.852698	0.859786	0.635312
PF08_0010	0.589	0.671822	0.622939	0.810873	0.6101	0.461669	0.617	0.715219	0.653326	0.9141	0.968	0.774405	1.14623	0.859	1.0531	0.850392	1.107	1.196	1.05524	1.2	0.868552	1.23278	1.3352	1.44426	1.25083	1.571	1.44367	1.63963	1.481	1.44739	1.15743	1.13836	1.16671	1.09782	1.13714	0.79931	0.520688	0.649119	0.406024	0.612608	0.535371	0.526817	0.698097	0.654423	0.606759	0.559166
PF08_0011	0.393	0.311502	0.277514	0.354204	0.263037	0.341178	0.206	0.258142	0.308443	0.484026	0.468	0.623396	0.966817	0.916	1.25682	1.09687	1.63748	1.732	2.00767	1.94	2.0195	1.67519	2.08489	1.65778	1.45165	1.542	1.45449	1.39489	1.296	1.30521	0.961402	0.843902	0.838721	0.713208	0.763987	0.587809	0.592642	0.564243	0.543639	0.564381	0.579075	0.252872	0.453533	0.449271	0.430522	0.426194
PF08_0012	0.735	1.11467	1.0631	1.22833	1.36877	1.08949	1.101	1.50978	0.848543	1.55073	1.033	1.16935	1.12344	0.728	0.738266	0.557194	0.682833	0.612	0.593831	0.599	0.570365	0.911021	0.713609	1.0604	1.21886	0.975	1.08587	1.26311	1.201	1.3684	1.0824	1.04213	1.31002	1.43719	1.64876	1.15731	0.826821	0.934827	0.609604	0.637373	0.665268	0.77047	0.70269	0.660153	0.688584	0.75692
PF08_0014	0.441	0.497474	0.518976	0.414924	0.311748	0.215615	0.163	0.292482	0.182203	0.220432	0.189	0.259426	0.37021	0.373	0.440266	0.516309	0.634607	0.77	0.891568	1.004	1.08685	1.36747	1.93152	1.64978	1.60739	2.035	1.76735	1.83685	2.311	1.58581	2.0785	1.27161	1.43987	1.34131	1.30408	0.956792	0.701228	0.698132	0.456066	0.626946	0.545083	0.528134	0.43057	0.372482	0.483393	0.403463
PF08_0018	0.395	0.485851	0.628807	0.540161	0.457879	0.64938	0.659	0.650092	0.598666	0.823152	1.019	1.01705	1.18467	1.21	1.4033	1.21485	1.70653	1.521	2.02906	2.032	1.92475	2.07739	2.19315	2.07042	1.86477	1.607	1.63755	1.46392	1.321	1.21268	1.03456	0.855418	0.872385	0.886662	0.911285	0.756277	0.389862	0.565439	0.434457	0.435343	0.706544	0.534719	0.642984	0.623478	0.592912	0.592125
PF08_0019	0.803	0.81595	0.961656	1.22706	0.998566	1.37486	1.35	1.66371	2.35822	2.44017	1.918	2.32967	2.67121	1.877	2.01782	1.78255	1.80299	1.66	1.98135	1.844	2.08081	1.43201	1.76914	1.16116	1.12542	1.307	0.952738	0.949353	0.939	0.670284	0.759742	0.515718	0.418399	0.298427	0.295578	0.321372	0.295667	0.276145	0.270682	0.374082	0.409116	0.451746	0.614279	0.966161	0.88748	0.825111
PF08_0020	0.729	0.743305	0.934408	1.13155	0.904799	0.851043	0.8725	0.900537	0.929884	1.08058	1.153	0.959617	1.07076	0.9835	1.09646	0.926904	1.00123	1.1465	1.18273	1.0885	0.932649	0.841338	1.2116	1.14117	1.01025	1.474	1.21651	1.50202	1.3405	1.77313	1.37598	1.2494	1.23452	1.29282	1.18428	1.05613	0.820934	0.799146	0.468576	0.601529	0.587573	0.547231	0.760673	0.649838	0.748379	0.823974
PF08_0021	0.4855	0.545129	0.391118	0.460465	0.383596	0.361471	0.219	0.251629	0.27005	0.244325	0.4065	0.227159	0.415062	0.396	0.624201	0.518062	0.581449	0.8655	0.791637	0.9255	0.855083	1.08406	1.40557	1.3219	1.27624	1.657	1.54602	1.80996	1.864	1.53202	1.82666	1.64709	1.50383	1.29983	1.17839	0.984259	0.748979	0.815882	0.546483	0.651059	0.636739	0.523525	0.601649	0.732357	0.612424	0.556893
PF08_0023	0.895	1.24368	1.04382	0.960145	1.16662	1.17066	0.765	1.87094	0.789978	1.71413	1.007	1.3152	1.62608	0.901	0.897368	0.902958	1.23195	1.204	0.743522	0.803	0.533208	0.642579	0.781271	0.777308	1.12378	0.782	0.778832	1.30256	1.114	0.782374	0.562772	0.579874	0.818522	1.01164	1.036	0.852414	0.566477	0.901355	0.689217	1.16656	0.990618	1.26173	1.18034	1.16558	1.11533	1.3911
PF08_0026	1.536	1.94224	2.1958	1.94432	2.71683	2.42883	1.662	2.83127	1.34049	2.62977	1.782	2.29095	2.78939	1.377	1.33679	1.5793	1.75805	1.077	1.27731	1.304	1.28471	1.07658	1.10785	0.974035	0.932795	0.683	0.706441	0.480504	0.427	0.283611	0.268255	0.234417	0.221222	0.270416	0.317182	0.273761	0.299592	0.400469	0.470851	0.690813	1.04282	1.22485	1.0747	1.87731	1.84168	1.62976
PF08_0028	1.497	1.63771	1.42781	1.97342	1.41504	1.55242	1.415	1.70397	1.45372	2.02397	1.439	1.3565	1.53068	1.176	1.30396	1.11906	1.3021	1.116	1.21892	1.192	0.968877	1.07845	1.13131	1.12198	1.04919	0.985	1.04094	0.983419	0.919	0.710907	0.775687	0.638273	0.716568	0.635639	0.682482	0.565835	0.732626	0.76388	0.661921	0.939767	1.16422	1.28543	1.17	1.07619	1.24877	1.13538
PF08_0029	0.327	0.231302	0.257392	0.178367	0.161963	0.162345	0.197	0.139728	0.260289	0.300589	0.394	0.711162	0.901319	0.982	1.48495	1.30946	1.98712	2.041	2.99465	3.111	2.65675	2.60679	3.68352	2.6582	1.80083	1.72	1.71992	1.41462	1.179	1.10134	0.855413	0.533814	0.530933	0.421245	0.443859	0.415678	0.276043	0.304835	0.30139	0.221582	0.321708	0.264726	0.245712	0.299132	0.224073	0.232986
PF08_0030	1.155	1.15651	1.44961	1.32194	1.62328	1.12373	0.825	1.42689	1.30145	1.70951	1.744	1.27131	1.32279	2.046	1.75349	1.10271	1.14755	1.608	1.45908	1.019	0.702273	0.903538	0.934638	0.634162	0.840171	0.765	0.902813	2.26895	1.324	0.57324	0.588097	0.630871	0.583834	0.759535	0.79541	0.489841	0.417335	0.922873	0.489048	0.860258	0.802449	0.937735	0.884103	1.30082	1.104	0.820565
PF08_0031	0.401	0.409137	0.383992	0.46932	0.270344	0.300592	0.242	0.364714	0.568732	0.565725	0.655	0.635012	0.939763	0.746	1.0632	0.959027	0.930538	1.37	1.3538	1.635	1.50023	1.35344	1.89093	1.48664	1.31067	1.753	1.41288	1.47647	1.722	1.47222	1.68363	1.22226	1.07726	0.882353	1.10866	0.681199	0.638431	0.475782	0.346883	0.379296	0.444321	0.330578	0.475349	0.488238	0.472064	0.493248
PF08_0032	0.548	0.536993	0.591917	0.808343	0.674641	0.771139	0.876	1.05388	1.21425	1.31334	1.172	1.03641	1.12914	1.248	1.12045	0.857401	0.978764	0.959	1.01494	0.929	0.90571	0.822164	0.858856	1.30991	1.10083	1.253	1.17907	1.2667	1.037	1.9943	1.6855	1.63516	1.49277	1.5654	1.55252	1.12434	0.711694	0.732799	0.541365	0.564381	0.68712	0.584767	0.739432	0.403427	0.40031	0.552347
PF08_0034	0.783	0.709016	0.795232	0.813403	0.747707	0.849775	0.738	0.929548	0.939645	1.24552	0.972	1.08029	1.58977	1.097	1.51399	1.20258	1.44294	1.6215	1.28019	1.3725	1.17092	1.18554	1.30588	1.03241	1.06558	1.2185	1.03054	1.17033	1.0915	1.26797	0.810391	0.76782	0.763217	0.815557	0.732072	0.700884	0.583484	0.708891	0.585152	0.718185	0.713221	0.690131	0.994903	1.01029	1.06372	0.994452
PF08_0036	1.618	1.41687	1.55525	2.36304	1.5563	1.56638	1.613	1.59859	2.04327	1.6386	1.244	1.16032	1.39541	0.911	0.95882	0.742925	0.665296	0.702	0.496778	0.562	0.535994	0.562139	0.60986	0.653355	0.653284	0.851	0.767183	0.865086	0.926	1.23976	1.24279	1.13014	1.15324	1.26266	1.1342	1.23788	1.62748	1.58156	1.05885	1.16135	1.26984	1.10105	1.61091	1.63434	1.89833	1.64454
PF08_0037	0.831	0.953104	1.19138	1.37507	1.41748	1.58413	1.393	1.28479	1.78819	1.77733	1.776	2.07411	2.61567	1.781	1.87218	1.59215	1.96301	1.843	1.67704	1.924	1.44914	1.59101	1.61487	1.26912	1.20903	1.271	0.886172	0.867775	0.842	0.608597	0.602166	0.431821	0.404933	0.375997	0.361372	0.379054	0.321832	0.325157	0.345746	0.383206	0.531729	0.555792	0.725654	0.835506	0.832091	0.829657
PF08_0038	0.401	0.567213	0.553351	0.46679	0.50659	0.677283	0.317	0.414448	0.342281	0.445489	0.581	0.443992	0.518294	0.545	0.703752	0.565371	0.755172	0.956	1.35298	1.315	1.464	1.21781	1.97934	1.53942	1.70001	1.511	1.95291	1.90229	1.594	1.40226	1.1368	0.919574	1.10063	0.859728	0.832726	0.6519	0.47359	0.531967	0.508382	0.573505	0.541441	0.603206	0.730246	0.712874	0.606759	0.50575
PF08_0039	0.894	1.05074	0.948242	1.54711	1.2409	1.29115	1.455	2.22026	2.13828	2.70993	2.087	2.55037	2.80078	1.808	1.72739	2.15518	2.15153	1.629	1.77985	1.778	2.15605	1.58914	1.58329	1.27312	1.30247	1.099	1.19654	1.00673	1.044	0.712412	0.891993	0.60455	0.554018	0.463262	0.514562	0.368067	0.367621	0.297662	0.336647	0.440556	0.507449	0.622961	0.633799	1.06702	1.14806	0.964902
PF08_0041	1.811	1.60517	2.52026	1.2979	1.50394	1.99253	2.055	1.60095	2.76167	2.15808	3.018	1.22227	1.22027	1.836	1.67688	0.957859	0.959035	1.445	1.73708	0.871	0.823035	1.37495	1.01132	0.999625	0.601644	0.783	0.728075	0.546842	0.633	0.429554	0.633587	0.762473	0.714644	0.75738	0.735509	0.881713	0.380704	0.796157	0.504971	0.75077	0.926277	1.32495	1.27334	0.732357	0.942869	1.12515
PF08_0042	1.781	1.56797	1.68856	1.84059	1.66468	2.20307	1.8	2.14447	2.26972	2.29219	2.284	1.86373	1.98632	1.553	1.67352	1.48235	1.47198	1.305	1.40315	1.142	1.02647	0.990525	0.966213	0.74692	0.700826	0.654	0.624065	0.504708	0.54	0.460397	0.438962	0.402211	0.390505	0.38677	0.444841	0.407438	0.435651	0.577393	0.524305	0.759894	1.04768	0.96671	0.970217	1.71686	1.65915	1.54112
PF08_0043	0.835	0.893826	1.06646	1.23339	1.14348	1.32413	1.02	1.20308	1.31316	1.34417	1.295	1.41974	1.62323	1.054	1.03795	0.810676	0.905329	1.054	0.84222	0.876	0.662329	0.763237	0.894943	0.855679	0.939352	0.912	0.991014	1.15375	1.313	0.921547	1.08615	0.773166	0.950294	0.965309	1.01538	0.769096	0.792806	0.759099	0.574347	0.745557	0.802449	0.983831	0.796841	1.18965	1.2815	0.961493
PF08_0044	2.103	2.16889	3.0778	2.92977	2.88854	3.65023	2.191	3.06455	2.10444	2.64981	1.762	1.87664	1.73429	1.309	1.11203	0.96954	0.910809	0.889	0.555996	0.527	0.440314	0.768849	0.375299	0.670948	0.56148	0.49	0.413547	0.425819	0.454	0.410747	0.488674	0.486108	0.589605	0.703512	0.690338	0.628095	0.553394	0.943195	0.956487	1.03231	1.46529	2.02693	1.69587	1.51858	1.85301	1.56612
PF08_0045	0.488	0.443426	0.370577	0.315621	0.286783	0.336105	0.265	0.247485	0.227103	0.256657	0.296	0.221351	0.254875	0.299	0.426376	0.283853	0.407179	0.6875	0.689238	0.8225	0.919644	1.15561	1.24588	1.6038	1.61395	1.508	1.64379	1.78889	1.6385	1.69677	1.79759	1.4065	1.37735	1.20287	1.18919	0.894989	0.660672	0.742363	0.489617	0.583281	0.566328	0.538671	0.517258	0.457867	0.466399	0.420511
PF08_0046	1.118	0.784567	1.12179	0.669192	0.767191	0.795237	0.613	0.722324	0.861558	0.645882	0.784	0.441411	0.563858	0.544	0.713012	0.573547	0.834086	1.169	1.11282	1.911	1.37296	1.64713	1.93423	1.8785	1.48362	1.898	1.69413	1.43434	1.228	1.10811	1.52605	0.938492	0.816599	0.783236	0.919141	0.754446	0.520688	0.919286	0.512932	0.894147	1.19578	1.159	1.21134	1.58391	1.7095	1.42746
PF08_0047	2.579	2.27118	2.5538	2.32636	2.4952	2.93489	1.973	2.54826	1.81942	2.54345	1.713	1.76693	2.0148	1.328	1.16927	1.04664	1.29662	0.966	0.976284	0.807	0.693913	0.911957	0.586404	0.775709	0.631973	0.566	0.496755	0.482297	0.386	0.597313	0.744735	0.686802	1.06475	1.01487	1.06153	0.971441	0.822896	1.23249	1.00994	1.42855	1.91082	2.15732	2.02999	1.2206	1.76489	1.48088
PF08_0048	0.803	1.13675	1.31714	2.09613	1.72192	1.09456	1.4	1.49438	1.40166	1.65247	1.397	1.62754	2.20275	1.483	1.72318	1.56411	1.44677	1.805	1.48704	1.3	1.38504	1.29732	1.18905	1.00842	0.931975	1.14	1.03595	1.00314	1.03	0.887694	0.695023	0.634161	0.504964	0.499892	0.466444	0.347009	0.351922	0.450677	0.315038	0.422308	0.604568	0.511013	0.616576	0.857282	0.931539	0.921714
PF08_0054	1.771	1.98583	1.6349	1.62111	1.46253	1.63804	1.248	1.37242	1.66715	2.21434	1.5255	1.83663	2.28676	1.469	1.3953	1.68735	1.84025	1.475	1.53639	1.456	1.53227	1.30807	1.65817	1.29152	1.22091	1.1505	0.922783	0.954284	0.9315	0.635679	0.726914	0.519008	0.546323	0.470265	0.556296	0.537451	0.637123	0.546312	0.616428	1.15288	1.0149	1.17678	1.19067	1.41486	1.5276	1.2854
PF08_0055	2.984	2.86047	2.91683	3.24096	2.62793	2.7066	2.408	3.0835	3.79372	3.46526	2.447	2.4226	2.76234	1.879	1.74086	1.71714	1.45445	1.237	1.26826	1.033	0.916857	0.905409	0.587306	0.654155	0.401643	0.465	0.290398	0.268042	0.229	0.224933	0.232612	0.223725	0.215451	0.198233	0.245497	0.262774	0.285201	0.485345	0.570935	0.73904	1.17029	1.31177	1.50412	1.36844	1.51816	1.57521
PF08_0056	2.238	1.8539	1.5301	1.75963	1.41504	1.75282	1.419	1.4482	1.63201	1.9731	1.299	1.15128	1.47372	0.933	0.870431	0.853896	0.845047	0.606	0.477861	0.544	0.432883	0.528467	0.567459	0.512608	0.468037	0.509	0.48261	0.450024	0.484	0.525094	0.662195	0.647321	0.760812	0.914674	0.917177	0.873473	1.26247	1.24803	1.4842	1.89257	2.04315	2.54584	2.09085	2.1157	2.14128	2.1662
PF08_0057	1.08	1.05423	0.686658	0.862739	0.529727	0.517475	0.303	0.367083	0.407353	0.294423	0.241	0.242647	0.240636	0.132	0.32578	0.210262	0.299219	0.486	0.625085	0.545	0.562933	0.468605	0.850737	0.921574	1.06968	1.439	1.30887	1.61094	1.907	1.62719	2.11602	2.11469	2.15644	1.9931	2.01308	1.53453	2.16256	1.8063	1.30678	2.00205	0.872861	0.937735	1.02074	1.02347	1.17324	0.703503
PF08_0060	0.26925	0.211252	0.183612	0.191017	0.163789	0.19659	0.30575	0.658973	0.751586	1.51104	1.49975	1.8134	2.31239	2.203	2.53911	2.60695	2.93931	2.87275	2.22604	1.77975	1.5065	1.26435	1.0853	1.16756	1.11189	0.99925	0.975205	0.851639	0.79575	0.906877	0.612249	0.62902	0.647075	0.555915	0.559733	0.504032	0.342764	0.421688	0.268692	0.328788	0.277397	0.263079	0.335844	0.332655	0.317542	0.413692
PF08_0061	1.847	2.08579	2.02476	1.87222	1.55752	1.79911	1.094	1.27117	0.994956	1.19465	1.0065	0.997692	0.974649	0.798	0.718484	0.69036	0.78038	0.6535	0.915831	0.8165	0.826286	0.919439	0.961703	0.951243	1.11271	0.9965	0.949826	0.946664	1.039	0.983234	1.0294	0.9607	1.26289	1.24542	1.47986	1.12709	1.12053	1.27493	0.952506	1.16917	1.29897	1.34207	1.16311	1.10026	1.2815	1.03537
PF08_0063	0.373	0.318476	0.307696	0.221377	0.16318	0.18137	0.144	0.146833	0.131446	0.271301	0.422	0.489166	0.916981	0.785	1.12129	1.40058	1.59474	1.847	2.2536	1.974	2.12261	2.31029	2.93112	2.16079	1.87051	1.773	2.08438	1.63604	1.705	1.02912	1.02987	0.626758	0.521315	0.585003	0.643202	0.564003	0.457891	0.497299	0.350295	0.368868	0.335062	0.355602	0.31001	0.513452	0.388981	0.529616
PF08_0064	0.663	0.62068	0.644737	0.45414	0.375071	0.303129	0.295	0.300771	0.361802	0.251262	0.287	0.238775	0.234941	0.242	0.376289	0.0946178	0.16879	0.339	0.32488	0.322	0.289827	0.304921	0.778564	0.686143	0.884434	1.118	1.36545	1.67011	1.967	1.56625	1.93125	1.76841	2.03044	1.9554	1.77838	1.5034	1.16959	1.03644	0.716512	0.709061	0.597285	0.670375	0.579834	0.623478	0.561441	0.570531
PF08_0065	1.706	1.51915	1.86714	2.22516	1.96669	2.36288	1.842	2.49143	2.49487	2.78238	1.989	2.40324	2.76091	1.724	1.75012	1.62369	1.43143	1.38	1.21727	1.293	1.15559	0.911957	0.88953	0.718131	0.581972	0.645	0.423532	0.393547	0.382	0.306931	0.338601	0.291171	0.31452	0.343676	0.351552	0.374476	0.504989	0.506863	0.502696	0.696027	0.877717	0.932466	1.21478	1.48534	1.72083	1.46724
PF08_0066	1.17	1.25298	1.20144	0.914604	0.929154	1.06666	0.811	1.03257	0.560924	0.807738	1.179	0.645338	0.928372	1.619	0.936933	0.577052	0.979641	0.917	1.01988	1.104	0.830466	0.773526	1.63201	1.10838	1.59673	1.468	1.89549	1.58046	1.471	1.02845	1.20996	0.70901	0.83295	1.04503	0.954492	0.85333	0.732626	0.961127	0.751769	0.965835	1.21399	1.31704	1.8038	1.9392	1.22233	0.586442
PF08_0067	0.778	0.527694	0.449388	0.49209	0.411604	0.426156	0.312	0.348137	0.380023	0.413118	0.46	0.374296	0.502631	0.525	0.777832	0.59691	0.826414	1.856	1.24852	1.603	1.39619	1.48158	1.43534	2.07282	1.84428	2.085	1.65169	1.91933	1.708	1.60011	1.85902	1.70755	1.4264	1.01164	1.14794	0.898194	0.556011	0.674223	0.385552	0.440556	0.481955	0.574231	0.717616	0.480215	0.498499	0.590988
PF08_0068	1.103	1.04028	1.05891	0.775453	0.518767	0.593574	0.327	0.447604	0.374817	0.345292	0.268	0.214252	0.281929	0.199	0.277797	0.178723	0.257569	0.297	0.319122	0.42	0.447746	0.512566	0.807433	0.914857	1.0328	1.142	1.18739	1.47558	1.511	1.77915	1.72771	1.76512	2.15547	2.0125	1.92568	1.64257	1.54506	1.60068	1.06794	1.28648	1.21885	1.14583	1.11374	0.846967	1.01211	0.853523
PF08_0069	1.109	1.11118	1.29283	1.45603	1.19706	1.54101	1.283	1.71345	1.57345	1.75267	1.26	1.31133	1.37547	1.242	1.29554	1.25106	1.40512	1.235	1.43934	1.191	1.36832	1.33473	0.812846	1.37149	1.04263	1.016	0.850392	0.752132	0.603	0.965179	0.781315	0.756716	0.683865	0.560224	0.654004	0.531958	0.470974	0.561853	0.503833	0.621732	0.829157	0.727008	0.983995	0.638377	0.752784	0.863752
PF08_0071	0.645	0.70088	0.654798	0.864004	0.720916	0.673478	0.665	0.864421	0.985195	1.00967	0.836	0.872496	1.05795	0.719	0.933566	0.825862	0.7749	0.947	0.840575	1.155	1.16302	1.05693	1.24679	1.18356	1.30493	1.35	1.30471	1.29718	1.434	1.3007	1.43225	1.17538	1.11862	1.01702	1.05466	0.757193	0.733934	0.604888	0.520893	0.553954	0.570577	0.591352	0.724505	0.809146	0.852233	0.830793
PF08_0072	0.965	0.679958	0.539098	0.394684	0.474928	0.610062	0.898	1.12019	0.816007	1.03742	0.793	0.970588	0.969665	0.402	0.777832	0.386648	0.414303	0.739	0.433447	0.339	0.338132	0.184262	0.215616	0.284693	0.164755	0.336	0.168081	0.081578	0.23	0.175282	0.151948	0.298574	0.29336	0.411549	0.436985	0.664718	0.767949	1.2301	1.60249	2.40872	3.27414	3.90767	4.88783	7.54477	8.19377	6.47587
PF08_0074	0.831	1.25531	1.23498	1.10689	1.19219	1.19983	1.016	1.94791	0.862859	2.07946	1.285	1.5088	2.60144	1.143	1.21978	1.49636	1.92684	1.314	1.13091	1.367	1.40176	1.76779	1.31354	1.39148	1.55165	0.974	1.14661	0.967282	0.915	0.589038	0.589035	0.416194	0.497269	0.506356	0.500814	0.409269	0.29305	0.410033	0.431045	0.578719	0.773314	0.92193	0.901326	1.53233	1.38976	1.36268
PF08_0075	0.632	1.24252	0.955787	1.51928	1.6866	1.15037	1.213	2.31262	1.14397	2.434	1.74	2.1593	3.25927	1.553	1.14654	1.6856	1.85888	1.063	1.23372	1.368	1.23269	1.63497	1.32166	1.14437	1.21804	0.868	1.03511	0.725238	0.72	0.389683	0.607794	0.351215	0.443406	0.397544	0.333876	0.262774	0.243337	0.265386	0.233151	0.302394	0.37391	0.516281	0.454682	0.979915	0.926504	0.901257
PF08_0076	1.031	1.27739	1.37667	1.52434	2.20294	2.36415	1.489	2.38367	2.23979	2.49104	2.236	2.60716	2.14295	1.791	2.24258	1.97296	1.8271	1.62	1.67292	1.525	1.72874	1.7865	1.04921	1.3195	1.02952	0.888	0.888668	0.693862	0.652	0.550671	0.725976	0.438402	0.457834	0.415859	0.405561	0.314047	0.306133	0.295271	0.290017	0.371475	0.491667	0.694082	0.482238	0.434372	0.551371	0.586442
PF08_0077	1.844	1.42849	1.14117	0.99936	1.16053	0.626551	0.699	0.651276	0.843338	0.499441	1.121	0.529177	0.575249	0.76	0.957137	0.432205	0.334292	0.78	1.06511	0.801	0.686482	0.659415	0.94817	0.671748	0.655743	0.884	0.655684	0.970868	1.207	0.657495	1.45758	1.16468	1.24269	1.55678	1.35711	1.40085	1.2834	2.71243	2.14612	1.96817	1.2577	1.11422	1.57646	1.26759	1.54837	0.911486
PF08_0078	1.01	0.897313	0.687496	0.561666	0.522421	0.627819	0.468	0.677327	0.527086	0.682877	0.66	0.876368	1.19037	0.884	1.01185	1.17747	1.4676	1.191	1.41549	1.495	1.38597	2.07645	1.74568	1.5946	1.51887	1.2	1.33383	1.18871	1.051	0.730467	0.778501	0.750958	0.923363	0.892049	0.865131	0.905519	0.866069	1.10936	1.18054	1.11312	1.23949	1.20509	1.2343	1.30541	1.13925	1.02514
PF08_0079	0.741	0.899056	0.943211	1.12017	1.50516	1.50169	1.2	1.58734	1.29234	1.9361	1.585	1.79081	2.27465	1.3055	1.37972	1.32874	1.44896	1.314	1.26744	1.3825	1.2313	1.37261	1.53457	1.3267	1.45698	1.084	1.28391	1.13134	1.0465	0.796292	0.691271	0.512017	0.497269	0.441715	0.461534	0.391873	0.317907	0.369388	0.348589	0.325204	0.476492	0.58806	0.592464	0.850405	0.782997	0.853523
PF08_0080	0.3525	0.421923	0.271645	0.280833	0.296526	0.360203	0.286	0.262879	0.144461	0.279779	0.319	0.304599	0.522565	0.477	0.68397	0.755774	1.04617	1.0625	1.5146	1.347	1.70645	1.99648	2.02174	2.16759	2.27953	1.765	2.11391	1.7239	1.5885	1.08329	1.6508	0.927388	1.14074	0.957229	0.944181	0.698595	0.677025	0.584566	0.546483	0.506379	0.554188	0.599255	0.431144	0.470474	0.47647	0.322202
PF08_0081	1.481	1.5238	1.91702	2.17645	1.91128	2.11936	1.65	2.57846	1.88254	2.99664	2.07	2.25545	2.778	1.741	1.68614	1.73992	2.00082	1.3395	1.51419	1.391	1.43241	1.12849	0.960349	0.777308	0.736891	0.645	0.56249	0.479607	0.4015	0.369747	0.279041	0.26485	0.272681	0.284421	0.348115	0.347466	0.320524	0.414217	0.448673	0.614563	0.878324	0.952222	1.16024	1.67273	1.80517	1.56271
PF08_0082	1.107	1.02633	0.846794	0.814668	0.739183	0.71026	0.519	0.493786	0.373515	0.357624	0.384	0.202636	0.209311	0.332	0.44195	0.116812	0.143581	0.553	0.239342	0.204	0.149558	0.168361	0.165095	0.234312	0.276232	0.411	0.594941	0.873154	1.318	1.05771	1.99784	1.72482	2.84511	3.07369	3.71879	2.65155	2.57597	2.57257	1.35682	1.49242	1.18607	1.45665	1.21823	1.45669	1.54585	1.13652
PF08_0083	2.205	2.4618	1.68269	1.93294	1.94233	1.74648	1.459	2.39906	1.24809	1.79275	1.006	1.52558	1.26726	0.708	0.830024	0.846888	0.858199	0.635	0.618505	0.466	0.676263	0.672509	0.316658	0.651756	0.569677	0.304	0.376103	0.351413	0.297	0.394196	0.468977	0.410436	0.58672	0.868347	0.99279	0.709582	1.13426	1.37475	1.60362	2.01639	3.13817	3.36768	3.34926	2.83545	2.53152	2.84015
PF08_0084	1.018	1.09723	1.31379	1.63187	1.4394	1.5055	0.897	0.873894	0.762648	0.864773	0.933	1.07771	1.33276	1.167	1.21052	1.18564	1.35909	1.278	1.44181	2.163	1.49744	1.71635	2.20398	1.44986	1.2705	1.66	1.29389	1.21291	1.418	0.78087	0.976409	0.644031	0.697331	0.49666	0.571517	0.310385	0.312674	0.317985	0.262721	0.353227	0.520803	0.642717	0.698097	1.059	1.01588	0.400054
PF08_0085	1.085	1.02633	1.39386	1.34724	1.60501	1.37296	1.098	1.23032	1.62616	1.42356	1.081	1.35392	1.08358	0.8715	0.792984	0.821773	0.905329	0.761	1.07251	1.0295	1.33163	1.17292	1.55081	1.39548	1.45083	1.408	1.50982	1.40476	1.544	1.1856	1.7385	1.11862	0.972416	0.855419	0.774298	0.605663	0.506951	0.447689	0.383846	0.466625	0.612459	0.68157	0.719913	0.77419	0.923357	0.860343
PF08_0087	0.704	0.661361	0.922251	1.24098	0.918194	1.05017	0.964	1.28005	1.56434	1.43666	1.191	1.25841	1.68018	1.198	1.2484	1.4438	1.44239	1.22	1.37765	1.448	2.00742	1.11305	1.48135	1.41547	1.39919	1.366	1.37294	1.17616	1.151	1.00956	1.37316	0.85624	0.781011	0.671192	0.61767	0.510899	0.554703	0.451873	0.361668	0.516155	0.513519	0.472818	0.559167	0.748403	0.850974	0.78306
PF08_0088	1.35	1.17278	1.49069	1.08918	1.22507	1.3571	1.17	0.954415	1.49406	1.34572	1.24	1.26615	1.22454	0.984	1.09604	0.732412	0.772708	0.959	0.998491	0.801	0.721781	0.777268	0.854346	0.821292	0.596726	0.804	0.90947	0.924252	0.856	0.78087	0.817895	0.706542	0.85892	0.965309	0.9977	0.911012	0.881768	0.99938	0.941702	1.10791	1.18364	1.13266	1.16311	1.52775	1.90966	1.30017
PF08_0089	0.6195	0.681702	0.789782	0.9437	0.672815	0.850409	0.892	1.04263	0.976736	1.18232	1.099	0.848619	1.11277	0.9985	1.10698	0.835207	0.971639	1.2275	1.03961	1.252	0.878771	1.14953	1.33429	1.39628	1.30452	1.5115	1.44825	1.42313	1.2045	1.61703	1.09272	1.18237	1.18162	1.10159	1.13518	0.892242	0.507605	0.716063	0.413416	0.534403	0.616708	0.517598	0.730246	0.673333	0.647672	0.685887
PF08_0091	1.196	1.11932	0.722709	1.29537	0.987607	1.03114	0.9	0.994676	0.956564	1.07596	0.778	0.816997	0.704823	0.767	0.715538	0.71489	0.612686	0.696	0.648114	0.523	0.643751	0.672509	0.405972	0.940447	0.763941	0.674	0.80962	0.99328	0.76	2.04696	1.66299	2.1772	2.16125	3.09847	3.56462	2.79987	2.63615	2.74949	1.6366	1.99684	1.45679	1.24592	1.35027	0.475631	0.667184	0.720551
PF08_0092	1.185	1.18208	1.48985	1.6559	1.49054	1.54291	1.258	1.7543	1.47714	1.77348	1.536	1.42555	1.87098	1.2815	1.46138	1.31414	1.48842	1.639	1.59397	1.736	1.43334	1.36653	1.57652	1.13078	1.09304	1.07	0.888252	0.739133	0.653	0.537506	0.382216	0.499268	0.440521	0.441176	0.511616	0.407438	0.382012	0.56245	0.474832	0.600225	0.934168	0.942344	1.27678	1.92888	1.75482	1.41155
PF08_0093	0.764	0.792704	0.926443	0.666662	0.455444	0.610062	0.554	0.35761	0.425573	0.417742	0.665	0.295565	0.30044	0.434	0.442792	0.342259	0.492122	0.621	0.846332	1.233	0.801669	1.00362	1.29099	1.82651	1.83608	2.095	1.5818	1.86912	1.825	2.32155	2.51184	2.32279	2.13528	1.88321	1.90702	1.34042	1.05485	1.03166	0.534541	0.789873	0.706787	1.42899	1.20674	0.6464	0.733902	0.760329
PF08_0094	0.708	0.747373	0.596948	0.556606	0.405515	0.565671	0.257	0.326822	0.251179	0.206559	0.429	0.148428	0.156627	0.2372	0.398176	0.115644	0.225784	0.442	0.440027	0.661	0.559218	0.623872	1.16559	1.11398	1.37788	1.628	1.7324	1.89691	1.981	2.08533	2.03723	1.81036	2.22376	1.95001	2.12502	1.76984	1.51366	1.32095	0.843892	1.05316	1.03432	1.09183	0.932327	1.05097	1.01211	0.791015
PF08_0095	0.325	0.319057	0.314404	0.4592	0.483452	0.543476	0.4875	0.692721	0.749633	1.10601	1.114	1.16483	1.86173	1.3875	1.65331	1.74108	2.37183	2.0915	1.99739	2.124	2.01996	2.0657	2.29329	1.78693	1.73157	1.704	1.35048	1.18064	1.048	0.844062	0.631711	0.532991	0.469857	0.398082	0.475282	0.477022	0.365005	0.369986	0.269545	0.303697	0.412758	0.322676	0.348474	0.504284	0.416046	0.454038
PF08_0096	0.809	0.9008	1.00022	1.14357	1.34806	1.40403	0.995	1.41504	1.04116	1.83437	1.285	1.33714	2.08741	1.3	1.73834	1.64121	2.13728	1.825	2.37532	2.315	2.40129	2.05775	2.0461	1.5994	1.59182	1.329	1.10917	0.935906	0.763	0.626652	0.470852	0.351215	0.350108	0.269338	0.35057	0.315879	0.291742	0.30603	0.268408	0.261988	0.522017	0.526817	0.609687	0.868743	0.740196	0.728507
PF08_0098	0.501	0.4905	0.394891	0.427574	0.527292	0.455327	0.43	0.39195	0.298031	0.426991	0.353	0.520142	0.778865	0.965	1.07246	1.07818	1.39197	1.622	2.14503	1.811	1.77612	2.09797	2.44666	2.36551	2.06477	1.876	2.08687	1.48813	1.398	0.901987	1.06458	0.686802	0.706949	0.644258	0.621598	0.428496	0.332298	0.378952	0.487911	0.413184	0.586359	0.524183	0.584427	0.624624	0.483393	0.573941
PF08_0099	0.758	0.910098	0.892068	1.0993	1.25551	1.41545	0.892	1.57372	1.76606	1.5199	1.739	1.6056	1.31282	1.493	2.11799	1.65873	1.69119	1.757	1.43276	1.758	1.63121	1.59756	0.84803	1.47545	1.21067	0.996	0.795474	0.765579	0.631	0.766576	0.967967	0.73204	0.734843	0.605473	0.635346	0.426665	0.296975	0.295271	0.239975	0.232009	0.332634	0.482038	0.342159	0.216613	0.307156	0.434149
PF08_0100	1.202	0.855469	1.3236	0.893099	1.43331	1.17066	0.865	1.07046	1.20644	1.00042	1.348	1.10095	0.924101	1.064	1.0691	0.803667	0.801205	1.2	0.984015	0.759	0.827679	0.866125	0.938246	0.907659	0.895089	1.079	0.613247	0.83102	1.28	0.804191	1.11147	0.958232	0.961836	1.26912	1.32667	0.819453	1.08716	1.0735	1.3011	1.06229	1.30261	1.54094	1.33993	1.58162	1.6881	1.03878
PF08_0101	1.068	1.21114	0.719356	0.599616	0.733094	0.380496	0.324	0.339848	0.213437	0.243554	0.222	0.298146	0.435708	0.403	0.508453	0.413515	0.737635	0.743	0.924467	0.896	1.02926	1.57324	1.45609	1.58021	1.54591	1.281	1.50025	1.34021	1.376	0.88318	1.36378	0.977973	1.49662	1.56432	1.65269	1.22048	1.32658	1.38192	1.14756	1.1822	1.16908	1.39343	0.757803	0.966161	0.923986	0.672817
PF08_0102	0.793	0.985649	1.21737	1.57705	1.15038	1.49916	1.33333	2.22223	1.69969	2.54705	2.21267	1.63529	1.7808	1.63833	1.55819	1.65172	1.76462	1.29467	1.60822	1.386	1.31243	1.39085	1.07688	1.30698	1.18498	1.13867	0.972709	0.937102	0.852667	0.781371	0.678765	0.653901	0.708232	0.595777	0.641238	0.538977	0.37329	0.554282	0.293808	0.477487	0.622778	0.698033	0.815595	0.919553	0.98483	0.930807
PF08_0103	0.92	0.913585	1.16036	0.891834	0.942549	0.527622	1.006	0.595621	0.665039	0.792323	1.228	0.641465	0.657834	0.968	0.995018	0.509301	0.632415	0.922	0.738861	0.707	0.762654	0.678122	1.02395	0.740522	0.628694	0.683	0.847896	1.50337	1.503	0.863621	1.05989	0.851305	1.01089	1.47813	1.25203	0.971441	1.00344	1.19543	1.00084	1.08197	1.36938	1.40528	1.27563	1.19939	1.52823	1.06492
PF08_0104	1.015	0.595109	1.09245	0.666662	1.10573	0.975339	0.872	0.854948	1.41077	0.810821	0.652	1.20291	0.731876	0.837	1.02111	0.987062	0.626935	0.967	0.760794	0.614	0.692055	0.82497	0.470025	0.695739	0.565579	0.669	0.560826	0.583597	0.576	0.842557	1.57389	0.852128	0.875271	1.52877	1.25891	1.34134	2.00818	1.61383	1.54107	1.41682	1.33175	1.39343	0.718764	0.547835	0.620607	0.767148
PF08_0107	3.035	1.95967	1.46237	1.44211	1.17027	0.927143	0.768	0.899945	0.665039	0.770742	0.756	0.615652	0.834396	0.915	0.902419	0.574482	0.530483	0.832	0.756225	0.696	0.352995	0.429321	0.456493	0.435837	0.697547	0.526	0.639042	0.298522	0.855	0.625147	0.695023	0.946717	1.08976	1.18078	1.14303	1.09413	0.943256	1.53972	2.00055	1.74919	2.00187	2.43653	2.6282	1.42689	2.30367	1.22516
PF08_0108	4.37	2.76633	1.44207	2.04426	1.3164	0.882751	0.968	0.820608	0.937042	0.471694	0.436	0.384621	0.347428	0.178	0.196141	0.114476	0.0975476	0.142	0.0518162	0.057	0.0529492	0.0514437	0.0369886	0.0231913	0.0155739	0.041	0.0249626	0.0609594	0.128	0.304675	0.786005	1.103	1.37254	1.80888	1.55252	1.65813	3.80573	3.80267	5.22826	7.89482	5.06599	4.93891	4.08295	2.53517	3.20626	2.31622
PF08_0109	0.924	0.888014	0.988485	0.865269	0.948638	1.04751	0.888	1.10598	1.00472	1.26402	0.947	1.0932	1.35981	0.843	0.881374	0.802499	0.976572	0.864	0.959834	0.836	0.923359	0.801586	1.07898	0.964438	1.02788	1.088	1.15577	1.05424	1.173	1.07276	1.4135	1.10875	1.38312	1.34346	1.44058	1.37339	1.19837	1.08067	0.916681	0.921519	0.657984	0.846859	0.713024	0.846967	0.798103	0.818292
PF08_0110	1.1	1.11118	0.969202	1.1752	1.02049	0.961387	0.93	1.12138	1.31837	1.27943	0.943	1.10998	1.04371	0.873	0.992493	0.999912	0.951363	1.097	1.2	1.061	1.37761	1.2571	0.820966	1.21954	1.10985	0.922	0.888668	0.985212	0.732	0.950133	1.35534	0.950007	0.982035	1.04827	1.03796	0.791985	0.960264	0.784203	0.608467	0.586539	0.821873	0.79286	0.794545	0.567319	0.715019	0.814882
PF08_0111	0.718	0.919629	1.0631	1.25363	0.982736	1.281	1.21	1.82712	1.49276	2.06713	1.787	1.52429	1.81403	1.396	1.50684	1.35268	1.47527	1.121	1.22303	1.354	1.44821	1.16543	1.0844	1.09879	1.15493	1.176	1.06008	0.975351	1.033	0.740999	0.483984	0.641563	0.630964	0.622711	0.674626	0.634504	0.546853	0.610865	0.415122	0.612608	0.745392	0.723057	0.890992	1.11057	1.04987	1.17402
PF08_0113	2.195	1.58773	1.47057	1.5838	1.26526	1.19856	1.162	1.34281	1.42769	1.43204	1.086	1.28164	1.46518	0.903	0.941142	0.7768	0.691601	0.833	0.820835	0.619	0.572223	0.579911	0.758717	0.540597	0.454102	0.628	0.581628	0.630213	0.64	0.657495	0.850723	0.854595	1.00319	1.27559	1.01636	1.15364	1.72036	1.77282	1.66845	2.41654	2.13663	2.31009	2.19074	2.17644	2.01917	1.92639
PF08_0114	0.915	1.16232	1.34104	1.76533	1.31884	1.47696	1.1955	1.50622	1.33398	1.77964	1.561	1.24808	1.59404	1.177	1.2282	0.966036	1.00562	1.065	0.927346	1.0615	0.900601	0.947032	1.09161	1.11478	1.03321	1.175	1.18822	1.22277	1.1505	1.09006	0.754114	0.790439	0.840164	0.722905	0.799829	0.657851	0.477515	0.574405	0.429907	0.478356	0.787274	0.741495	1.08905	1.18736	1.18582	1.05014
PF08_0115	1.923	1.48312	1.27187	1.33585	1.18488	1.05524	0.941	1.20545	1.08801	1.27327	1.032	1.07513	1.20888	0.829	0.741634	0.801331	0.882312	0.761	0.824947	0.798	0.713421	0.690281	0.875997	0.647757	0.704104	0.688	0.743885	0.631109	0.772	0.684578	0.960464	0.848015	1.0811	1.47921	1.39344	1.14357	1.51366	1.79554	1.86179	2.88968	2.40856	2.68018	1.57646	1.59995	1.70069	1.30131
PF08_0116	0.609	0.711341	0.830026	1.0234	0.923065	1.06158	1.02	1.38899	1.18041	1.4937	1.296	1.20936	1.34842	1.146	1.17011	1.14125	1.32292	1.023	1.29212	1.017	1.09335	1.24961	0.983354	1.50743	1.29673	1.112	1.02763	1.13671	0.941	1.00204	1.13961	0.861175	1.02051	0.928679	0.981988	0.821284	0.54162	0.588152	0.457203	0.427522	0.586359	0.578182	0.593612	0.612017	0.639489	0.618265
PF08_0118	2.7785	2.58675	1.37541	1.33712	1.53743	1.19539	0.7765	0.977506	0.473076	0.610428	0.4955	0.493683	0.429301	0.378	0.432269	0.186315	0.258665	0.314	0.147635	0.312	0.191825	0.293697	0.253507	0.317481	0.273773	0.283	0.267932	0.214703	0.3375	0.376894	0.791163	0.771521	1.64282	2.08737	1.72977	1.52675	1.75111	2.9569	3.34998	6.18278	4.95066	7.48015	3.39232	2.50079	3.13513	1.8315
PF08_0120	1.63	1.26228	1.39931	1.5838	1.18367	1.26832	1.451	1.69095	1.68928	1.52761	1.395	1.05319	1.2459	1.026	0.974815	0.968372	1.07412	0.854	0.929402	0.987	1.07849	0.661285	0.691957	0.790903	0.686071	0.84	0.677318	0.64097	0.652	0.640193	1.0974	1.05611	1.109	1.02564	0.786572	0.856077	1.55814	1.22412	0.90872	1.66968	1.7785	1.55938	1.78198	1.33177	1.71579	1.48088
PF08_0121	1.586	1.64933	2.07339	2.04932	2.48546	2.54425	1.777	2.69865	2.13958	2.60511	1.846	1.87019	1.92509	1.251	1.23746	1.10855	1.19907	0.885	0.886633	1.044	1.10915	1.06629	0.929225	1.12198	1.13362	0.866	0.673158	0.689379	0.658	0.539387	0.644374	0.427709	0.462643	0.410472	0.394759	0.412931	0.414719	0.410033	0.456066	0.555257	0.857079	1.02071	0.915104	0.967308	0.983152	1.0706
PF08_0123	1.219	1.22276	1.56615	1.55723	1.46132	1.72618	1.304	1.28953	1.28323	1.56461	1.563	1.26744	1.74853	1.356	1.47148	1.13074	1.57611	1.313	1.2477	1.275	1.41105	1.14673	1.21972	1.0724	1.0164	1.091	1.16409	0.890187	0.89	0.944115	0.729727	0.700784	0.679056	0.64318	0.621598	0.626264	0.418644	0.500886	0.536816	0.684296	1.00397	1.05363	1.10915	1.12432	1.03728	1.06151
PF08_0124	1.255	1.25124	1.31756	1.28525	1.42478	1.57716	1.0435	1.44583	1.06003	1.46518	1.137	1.46556	1.65598	1.1145	1.10993	1.1798	1.47911	1.0945	1.40891	1.298	1.53646	1.26692	1.4421	1.14797	1.0955	0.951	1.0089	0.922011	0.9225	0.683449	0.779439	0.53587	0.62856	0.599009	0.628472	0.596965	0.622078	0.664062	0.54762	0.8381	1.1454	1.42306	1.11776	1.75353	1.55215	1.29506
PF08_0125	0.49	0.45563	0.327818	0.495885	0.344627	0.310739	0.24	0.27472	0.281113	0.303672	0.254	0.380749	0.495512	0.468	0.613679	0.633122	0.839567	0.995	1.13173	1.142	1.40269	1.25897	1.56525	1.40747	1.48034	1.667	1.52105	1.7732	1.769	1.6633	1.64236	1.38265	1.27732	1.0655	1.04582	0.762686	0.794114	0.69335	0.558425	0.537009	0.606997	0.538671	0.559167	0.636085	0.537523	0.443241
PF08_0126	0.62	0.667173	0.661505	0.515493	0.449355	0.35513	0.322	0.32919	0.240768	0.367644	0.251	0.252972	0.308271	0.288	0.417537	0.253482	0.374298	0.514	0.621795	0.607	0.656756	0.803457	1.25716	1.24353	1.39837	1.44	1.84224	1.8754	1.816	1.68248	1.62594	1.53564	1.92752	1.91176	1.96987	1.44114	1.00736	1.02688	0.701158	0.595012	0.736894	0.700667	0.785359	0.754706	0.679772	0.735326
PF08_0129	1.778	1.17395	0.761276	0.914604	0.636891	0.52128	0.505	0.416817	0.471124	0.275926	0.219	0.205217	0.206463	0.128	0.234865	0.0794322	0.118372	0.287	0.0740232	0.195	0.0928933	0.106629	0.21291	0.223916	0.323773	0.488	0.587453	0.868672	1.093	1.63321	2.46775	2.48647	2.74797	3.18681	3.31519	2.72846	2.8821	3.70703	2.7489	3.29896	1.9084	1.78723	1.73606	1.2332	1.3885	1.05014
PF08_0130	1.33	1.25647	1.60975	1.93547	1.49907	1.89741	1.408	2.04027	1.78689	2.41088	2.182	1.98506	2.64558	1.748	2.11294	1.82227	2.05727	1.755	1.53393	1.486	1.40733	1.26832	1.15657	0.894864	0.742629	0.77	0.548345	0.470643	0.411	0.469425	0.342353	0.307621	0.355879	0.357682	0.442877	0.474276	0.524613	0.689764	0.534541	0.822459	0.882573	0.837639	0.864584	1.29738	1.14554	1.24789
PF08_0131	0.311	0.273146	0.217148	0.230232	0.161963	0.134442	0.096	0.129071	0.119733	0.181895	0.175	0.250391	0.428589	0.478	0.770255	0.760447	1.06097	1.236	1.44263	1.954	1.78912	2.05681	2.31314	2.08882	2.19756	2.493	2.05692	1.73286	1.472	1.27888	1.23059	0.912994	0.774278	0.55376	0.646148	0.554848	0.442192	0.392101	0.322999	0.376689	0.335062	0.323993	0.287046	0.257872	0.265615	0.209119
PF08_0132	0.355	0.31034	0.260746	0.287158	0.32149	0.299324	0.271	0.470103	0.481535	0.952637	0.838	1.30874	2.03046	1.378	1.88902	1.92506	2.49568	2.092	2.33173	2.012	2.46539	1.94083	1.89273	1.57621	1.42132	1.342	1.3771	1.13402	1.029	0.934335	0.681892	0.582342	0.5973	0.508511	0.568571	0.494419	0.393787	0.417205	0.325274	0.407971	0.34356	0.356919	0.36742	0.474485	0.402828	0.534162
PF08_0137	2.212	2.19272	2.42133	2.49334	2.0361	2.12127	1.914	1.98521	1.89491	2.63825	1.7965	2.05346	2.41847	1.788	1.86166	1.81292	2.04302	2.0055	2.04098	1.559	1.31537	1.04898	0.757363	0.610571	0.436889	0.406	0.336579	0.242493	0.1715	0.208006	0.174928	0.166148	0.152932	0.217626	0.283795	0.327781	0.415373	0.557669	0.734709	0.972352	1.48046	1.51658	1.91919	2.5134	2.33388	2.26962
PF08_0142	0.662	0.662524	0.617908	0.366854	0.434742	0.35513	0.245	0.356426	0.111924	0.217349	0.093	0.129068	0.185105	0.079	0.0824973	0.100458	0.173174	0.095	0.106922	0.183	0.192289	0.313339	0.421309	0.600575	0.912303	0.665	1.32218	1.33304	1.612	1.27587	0.964216	1.27079	2.15932	2.46714	2.42256	2.85756	1.54636	2.40521	1.40232	0.959318	0.917779	1.24856	0.662503	1.09109	0.991963	0.900121
PF10_0009	0.069	0.068577	0.0687496	0.0670457	0.0560171	0.0849775	0.079	0.158674	0.475028	0.948013	1.383	1.86761	3.08271	2.623	3.68712	3.29644	3.58076	4.029	3.39355	4.441	2.98466	2.49175	1.91619	1.03321	0.719678	0.761	0.437677	0.303901	0.254	0.212896	0.19697	0.147231	0.123115	0.107735	0.127658	0.145579	0.111202	0.12552	0.0671019	0.106881	0.100761	0.0895589	0.107929	0.126071	0.128401	0.161385
PF10_0012	1.238	1.44244	1.48147	1.10689	1.33102	1.11232	0.827	1.21019	0.465918	1.022	0.804	0.571769	0.7333	0.887	0.616204	0.386648	0.463625	0.623	1.07087	0.606	0.319553	0.39752	0.375299	0.544596	0.695907	0.74	0.919455	1.50068	1.716	0.977216	1.52417	1.46244	2.31225	1.96833	2.5188	2.02162	1.65626	1.71664	1.21238	1.07532	1.21399	1.3526	1.18722	1.08994	1.36332	0.788742
PF10_0013	0.12	0.154589	0.134146	0.158127	0.155874	0.168687	0.259	0.516284	0.697576	1.34726	1.588	1.74628	2.78654	2.101	2.65927	2.81167	3.22784	3.021	2.99136	2.966	2.36413	2.38605	1.90626	1.54182	1.25821	1.053	0.98935	0.649038	0.653	0.369371	0.407072	0.302686	0.262581	0.216548	0.288704	0.187696	0.149142	0.16736	0.117144	0.127735	0.149321	0.183069	0.153857	0.22922	0.220297	0.259126
PF10_0015	5.074	4.68416	4.47292	5.82412	3.72514	3.34456	2.53	2.51274	2.72913	1.55998	1.019	1.15644	1.12629	0.564	0.71217	0.527991	0.458145	0.633	0.435914	0.434	0.437527	0.332981	0.513329	0.307885	0.322134	0.294	0.27542	0.179292	0.21	0.166255	0.251371	0.215499	0.221222	0.321051	0.298524	0.389126	0.588717	0.815284	1.16007	1.57453	1.86348	1.73059	2.35608	3.8784	2.9696	2.88675
PF10_0016	0.253	0.238276	0.169359	0.150537	0.104728	0.112881	0.075	0.105388	0.171791	0.254345	0.327	0.529177	0.944035	0.791	1.11119	1.53374	1.74599	1.877	2.47073	2.762	3.11843	2.54506	3.04118	2.63181	2.71232	2.294	1.98369	1.55984	1.513	1.14121	1.41631	0.747668	0.634812	0.568843	0.526346	0.431243	0.376779	0.323962	0.241112	0.340193	0.268292	0.287115	0.235378	0.263603	0.299603	0.227303
PF10_0017	1.11	1.59006	1.21066	2.44021	2.49642	2.23859	2.053	3.22678	3.64665	3.99861	2.302	3.07955	2.99585	1.735	1.77369	1.50104	1.1355	0.904	0.734475	0.893	0.697629	0.707117	1.19717	1.22194	1.58198	1.028	1.18156	1.18423	1.192	0.597313	0.76068	0.402211	0.452063	0.438483	0.447787	0.273761	0.32314	0.413619	0.362805	0.39624	0.942059	0.88637	0.87951	1.18507	1.24247	1.17857
PF10_0019	1.934	2.61522	2.34755	2.78809	2.87027	3.92799	2.95	2.42985	4.25964	5.84993	3.203	3.59195	4.21185	2.323	2.45892	2.25214	1.51473	1.108	0.652227	0.451	0.350208	0.238512	0.182236	0.118356	0.0860663	0.086	0.0748877	0.0439266	0.04	0.0383664	0.0525254	0.0444159	0.0452063	0.088343	0.12864	0.130014	0.256419	0.312007	0.42877	0.620428	1.17636	1.22485	1.49149	2.01026	2.37417	2.19234
PF10_0020	0.505	0.588135	0.401598	0.52245	0.372636	0.215615	0.171	0.204856	0.148365	0.141817	0.091	0.0761498	0.0811614	0.064	0.0976498	0.0876091	0.130429	0.161	0.226182	0.312	0.422665	0.486377	0.723532	0.864476	1.03198	1.196	1.52438	1.68087	2.048	1.97098	2.19856	2.28084	2.2103	2.72355	2.45792	1.85224	1.41946	1.40224	0.748357	0.759894	0.69926	0.665107	0.692356	0.610871	0.626901	0.942172
PF10_0021	1.792	2.67102	2.38947	3.75203	3.30623	2.406	1.931	3.01245	2.03546	2.61898	1.667	1.81598	1.66594	0.932	0.617888	0.79549	0.687217	0.421	0.470459	0.437	0.568507	0.621066	0.593621	0.672548	0.759023	0.594	0.748045	0.781715	0.887	0.700375	1.10303	0.809357	0.912782	1.13661	1.30506	0.949467	0.866069	0.98384	0.677843	0.871989	1.17029	1.33153	1.29286	1.62746	1.8014	1.66159
PF10_0022	3.178	4.54119	4.14929	4.45158	4.07342	2.48718	2.314	2.25934	2.31007	2.02859	1.321	0.943483	0.828701	0.541	0.471413	0.369126	0.323332	0.3	0.348732	0.294	0.269391	0.405938	0.390635	0.494215	0.43361	0.436	0.509237	0.533395	0.634	0.607092	0.947333	0.730395	0.888736	1.13769	1.35318	1.05018	1.15389	1.07469	0.84048	0.858954	1.69109	1.81489	1.47772	1.61715	1.59495	1.75819
PF10_0023	3.402	4.60512	3.29998	5.48889	4.18302	3.18856	3.263	3.57136	3.24451	3.00744	1.967	1.7024	1.47657	1.01	0.930199	0.978885	0.747499	0.715	0.606168	0.486	0.556431	0.491989	0.25892	0.421442	0.327872	0.262	0.229656	0.149709	0.145	0.197098	0.236364	0.244288	0.25681	0.424477	0.521436	0.518224	0.652822	0.98384	1.08045	1.60451	2.9585	3.03052	3.02432	2.45724	2.4283	2.05596
PF10_0025	3.392	3.49394	4.81667	2.66285	3.91268	4.23873	2.498	3.48965	2.14478	2.81937	1.647	1.83018	1.78982	0.977	0.750894	0.737084	0.574325	0.422	0.366826	0.292	0.309335	0.283408	0.245388	0.229514	0.200002	0.168	0.146447	0.119229	0.106	0.0887694	0.142569	0.128313	0.187558	0.361991	0.441895	0.499912	0.921016	1.12729	1.51832	2.31097	3.11996	3.57577	3.0714	4.45489	5.26949	4.23239
PF10_0026	0.9735	1.14954	1.23498	1.09677	0.944985	0.711528	0.832	0.849619	0.789978	1.06131	0.9655	1.09127	1.38829	0.994	1.19916	1.18447	1.41389	1.5055	1.66018	1.4705	1.31258	1.38103	1.57382	1.26033	1.12255	1.182	1.38709	1.10041	1.0745	0.993014	0.69174	0.52929	0.498712	0.537061	0.664315	0.482058	0.355847	0.527185	0.508382	0.615215	0.986976	0.97988	1.1878	1.36902	1.45081	1.26949
PF10_0028	1.662	1.70745	1.75395	1.57368	1.74506	1.75916	1.143	1.74542	1.36001	1.90065	1.319	1.39006	1.86244	0.993	1.09604	0.98823	1.33607	1.008	0.804385	0.946	0.882486	1.07564	1.16198	1.01162	1.06886	0.973	1.0451	0.882119	0.986	0.701128	0.625615	0.612775	0.754079	0.713208	0.638292	0.585062	0.4435	0.543921	0.648273	0.673869	1.04282	1.2367	1.18608	1.79021	1.76237	1.44451
PF10_0029	0.607	0.560239	0.497177	1.00189	0.719699	0.807921	0.993	1.16519	2.2515	1.94227	1.835	1.55139	1.73429	1.577	1.76948	1.43562	1.25716	1.511	1.15558	1.457	1.01068	0.929728	1.41639	1.04601	0.953287	1.448	1.38626	1.16809	1.459	1.34809	1.20996	1.0265	1.01089	0.88343	0.926997	0.615276	0.485365	0.456655	0.313901	0.377992	0.447963	0.387211	0.517832	0.520329	0.522417	0.542118
PF10_0030	0.608	0.567213	0.680789	0.832379	0.759885	0.597379	0.622	0.646539	0.943549	0.776908	0.8	0.851846	0.999567	0.738	0.978182	0.642467	0.854911	1.083	0.874296	1.045	0.928933	0.825905	1.34332	1.0628	1.14017	1.45	1.29972	1.45316	1.68	1.49027	1.35722	1.19265	0.971454	0.878044	0.8396	0.662887	0.557319	0.530771	0.38214	0.402757	0.524445	0.562377	0.699245	0.911149	0.764114	0.78306
PF10_0031	0.798	0.734588	0.700911	1.08159	1.02536	1.07427	0.822	0.882183	1.32878	1.48137	0.99	1.2042	1.29716	0.848	0.947035	0.914639	1.00507	1.014	0.851267	0.941	0.8797	0.864254	1.46781	1.10119	1.18526	1.445	1.43119	1.55984	1.754	1.65803	1.57764	1.25927	1.10419	0.98147	0.9977	0.669296	0.565169	0.60967	0.36508	0.436646	0.704116	0.646668	0.713024	0.931779	0.901327	0.754647
PF10_0033	1.002	1.03795	1.14443	1.66349	1.31275	1.39769	1.237	1.46359	1.59167	1.47828	1.227	1.08159	1.15192	0.744	0.760995	0.603919	0.533771	0.528	0.476216	0.624	0.611238	0.555592	0.837204	0.843684	0.99509	1.106	1.20902	1.27835	1.362	1.37593	1.38536	1.31767	1.24846	1.29175	1.30604	0.932986	0.845137	0.688568	0.529992	0.671262	0.71747	0.761251	0.878362	0.944386	1.05868	0.984223
PF10_0034	1.18	1.46453	0.830864	0.814668	0.786676	0.880215	0.587	0.608647	0.421669	0.545685	0.496	0.339448	0.364514	0.398	0.394808	0.228952	0.311275	0.34	0.379163	0.352	0.202507	0.189874	0.170508	0.380657	0.490168	0.483	0.808788	0.981626	1.212	1.1683	1.52511	1.43694	2.48154	3.20082	3.41535	2.60852	2.17695	2.36456	1.88909	1.87693	1.65953	1.85308	1.21019	1.37073	1.532	1.14788
PF10_0035	0.578	0.452143	0.271645	0.433899	0.417693	0.466742	0.463	0.467735	0.645518	0.60272	0.529	0.672442	0.804494	0.87	1.13728	0.998743	1.23743	1.61	1.80617	1.777	1.99442	1.3843	1.93333	1.56341	1.37624	1.383	1.49942	1.59122	1.341	1.14347	1.028	0.850483	0.831026	0.871579	0.82487	0.739797	0.671138	0.713672	0.592544	0.514851	0.796379	0.728325	0.637243	0.624624	0.640748	0.405736
PF10_0036	1.077	0.960078	0.678274	0.98418	0.668552	0.658259	0.834	0.889288	1.28843	1.1592	1.187	1.17968	1.41676	1.135	1.41508	1.18331	1.35909	1.309	1.28965	1.545	1.25127	0.965271	1.13672	0.907659	0.830335	0.953	0.791314	0.781715	0.773	0.793659	0.986727	0.888318	0.966645	1.1894	1.24712	0.943058	1.50842	1.57199	1.48989	1.91473	1.2929	1.14714	1.03452	0.984499	1.211	0.908076
PF10_0037	1.6055	1.1292	0.858113	0.862106	0.709956	0.711528	0.6325	0.453525	0.564177	0.361478	0.581	0.280722	0.358819	0.487	0.602735	0.206757	0.277298	0.5745	0.297327	0.4635	0.236878	0.249736	0.311696	0.34667	0.334429	0.6075	0.564154	0.858362	0.9815	1.36953	1.73662	1.768	2.13624	2.75749	2.66806	2.21619	3.00246	3.25217	2.50836	2.99852	1.51385	1.59889	1.80495	1.23607	1.39668	1.04389
PF10_0038	0.9445	1.22857	1.52297	1.23402	1.73958	2.38761	1.5905	2.40676	2.13502	3.19781	2.3095	2.76914	2.71819	1.996	1.97362	2.11371	1.91862	1.54	1.70952	1.6445	1.41662	1.72804	0.932382	1.46425	1.23362	0.7975	0.726411	0.606905	0.499	0.549919	0.770997	0.512839	0.564598	0.446025	0.467917	0.412473	0.350614	0.424976	0.269545	0.409926	0.583324	0.767178	0.519554	0.38337	0.491576	0.514842
PF10_0039	3.299	2.64544	0.835056	1.91143	0.963251	0.880215	0.756	0.70101	0.726207	0.422367	0.352	0.32525	0.271962	0.128	0.13974	0.101627	0.0745307	0.102	0.063331	0.057	0.0631674	0.0551851	0.0315756	0.0383856	0.0278691	0.029	0.0424364	0.137159	0.176	0.472434	0.91169	1.30287	1.68033	2.39604	2.01406	1.7268	3.91955	4.27486	3.97494	5.93317	4.30725	3.64821	2.6592	2.00911	2.45096	1.89912
PF10_0040	0.86	0.937994	0.970879	0.865269	0.812249	1.36979	0.704	0.779163	0.743126	1.02817	1.301	0.769242	0.858602	0.616	1.22652	0.663493	0.795725	1.138	2.09815	1.296	1.23641	1.28048	2.60003	1.61379	1.55739	2.024	1.27476	1.51592	1.602	1.14949	0.907001	0.844725	0.947408	0.827408	0.64222	0.633588	0.464433	0.958736	0.514069	0.703847	0.836441	0.762568	0.776174	0.934071	1.07379	0.883073
PF10_0041	0.659	0.717153	1.02034	1.38392	1.17636	1.34062	1.2	1.5003	1.56043	1.94689	1.544	1.62238	2.11162	1.494	1.79726	1.47767	1.59145	1.614	1.77327	1.38	1.39804	1.11305	1.3785	1.0596	1.07378	1.184	1.02513	0.981626	0.855	0.852337	0.5956	0.525588	0.440521	0.395389	0.461534	0.466035	0.427801	0.418401	0.369629	0.413184	0.498951	0.414869	0.678578	0.86072	0.818244	0.85466
PF10_0043	1.0855	1.11757	1.24252	1.24224	1.49176	1.58604	1.485	1.94909	2.75907	2.69991	2.2015	2.47293	3.07701	1.958	2.0094	2.03428	1.94766	1.679	1.64332	1.5765	1.34277	1.35063	1.06726	1.16796	1.20862	1.01	0.947746	0.751235	0.611	0.618753	0.808515	0.512428	0.519872	0.444947	0.416854	0.376307	0.374163	0.325157	0.31845	0.486176	0.541441	0.611108	0.591316	0.347268	0.674737	0.758624
PF10_0045	0.517	0.464929	0.452741	0.47944	0.33245	0.300592	0.341	0.35761	0.385228	0.397703	0.468	0.407853	0.580945	0.493	0.700385	0.571211	0.556788	0.92	0.866071	0.823	0.859263	0.885767	1.21972	0.961239	1.0287	1.504	1.44949	1.75438	1.981	1.91682	1.62829	1.63434	1.76785	1.5557	1.66152	1.20309	1.06231	0.952758	0.667607	0.735129	0.547511	0.524183	0.651021	0.650984	0.737679	0.568258
PF10_0046	1.294	1.6598	1.71119	1.4535	2.31619	1.9418	1.337	2.3742	0.874572	2.44788	1.256	1.56301	1.96069	1.065	0.685233	1.04664	1.20455	0.784	0.927757	0.747	0.848116	0.985848	0.847128	1.03561	1.13689	0.788	1.02347	0.951146	0.882	0.628156	0.770059	0.620178	0.844492	0.803706	0.949582	0.806635	0.514147	0.787789	0.600505	0.789873	1.05982	1.3526	1.01155	1.63548	1.48165	1.54112
PF10_0047	0.28	0.226653	0.312727	0.184692	0.197278	0.298055	0.255	0.459446	0.417764	0.937222	0.814	1.07642	1.99629	1.342	1.92353	1.83045	2.28524	2.394	1.87361	2.207	1.87552	2.19898	2.3826	1.8689	1.8992	1.586	1.47945	1.12327	0.949	0.784631	0.528068	0.524766	0.517468	0.485887	0.480192	0.477938	0.358463	0.376561	0.285468	0.303697	0.271934	0.308188	0.463867	0.477923	0.425487	0.562575
PF10_0048	0.729	0.68577	0.3689	0.628711	0.38116	0.352593	0.206	0.266431	0.227753	0.184978	0.133	0.135521	0.182257	0.113	0.162469	0.175218	0.258665	0.266	0.296915	0.471	0.528563	0.538756	0.855248	0.928452	1.05493	1.097	1.16326	1.35186	1.683	1.53616	2.27266	2.20846	2.30937	1.86705	2.00129	1.4329	1.99771	1.37475	1.11912	1.43376	0.848581	0.904809	0.811767	1.05327	0.864821	0.769421
PF10_0050	0.593	0.534668	0.260746	0.46426	0.305659	0.374155	0.219	0.234459	0.372214	0.260511	0.194	0.260716	0.317526	0.263	0.418379	0.30488	0.421975	0.788	0.681836	0.923	0.821177	0.806263	1.44977	1.3339	1.45165	1.719	1.9113	2.07083	2.529	2.41934	2.40304	1.84162	1.87269	1.59987	1.3247	0.850583	0.587409	0.784203	0.46289	0.587843	0.673766	0.566329	0.623465	0.653276	0.728867	0.542118
PF10_0051	0.683	0.703786	0.530294	0.763435	0.758667	0.827579	0.474	0.91297	1.15699	1.22548	0.943	1.11256	1.0494	1.0705	1.30691	1.17863	1.12015	1.2145	1.43153	1.5865	1.38039	1.66771	1.24633	1.62619	1.48239	1.3915	1.34548	1.25505	1.198	1.42821	1.82104	1.22843	1.1542	1.03372	1.02618	0.71416	0.59068	0.601302	0.398062	0.508986	0.706544	0.713179	0.611409	0.510587	0.536265	0.609173
PF10_0052	0.433	0.478877	0.341233	0.273243	0.232593	0.248464	0.178	0.235643	0.157475	0.164939	0.283	0.220705	0.355971	0.378	0.622939	0.659988	0.81107	1.059	1.50349	1.426	1.53367	1.81549	2.07767	2.1432	1.9869	1.813	2.05608	1.72838	1.595	1.20215	1.5842	0.83321	1.00993	1.00086	0.94369	0.623517	0.532462	0.514035	0.358256	0.357137	0.489239	0.491257	0.3479	0.418326	0.342404	0.339818
PF10_0053	1.412	1.6226	1.62568	2.36051	1.72557	1.98619	1.341	1.5157	1.75305	1.90527	1.548	1.44039	1.4723	1.355	1.3048	1.13775	1.12125	1.154	1.33242	1.412	1.21226	0.983042	1.49939	1.24433	0.913122	1.253	1.05342	1.22905	1.185	1.04643	0.836654	0.58152	0.562674	0.693816	0.645166	0.407438	0.291742	0.62521	0.459478	0.546133	0.904425	0.932466	1.05863	1.07733	1.49927	1.1888
PF10_0054	1.345	1.43314	1.83612	1.74066	1.98861	1.7414	1.268	1.40557	1.21035	1.59235	1.558	1.65335	2.33375	1.375	1.60701	1.49169	2.2688	1.644	1.53393	1.729	1.42313	1.28796	1.45248	1.13317	1.00165	0.878	0.895325	0.776336	0.657	0.550671	0.447404	0.34957	0.326062	0.412627	0.393777	0.354333	0.317907	0.503276	0.444693	0.578719	0.852223	0.97988	1.08389	1.56672	1.62012	1.22403
PF10_0055	1.014	0.920559	1.04885	0.99936	1.01927	0.924606	0.826	1.23979	0.920123	1.40892	1.094	1.44039	1.93079	1.111	1.2846	1.25106	1.22428	1.4	1.18684	1.166	0.888989	1.07003	1.38572	1.04201	1.10657	1.044	0.847896	0.994176	1.08	0.707898	0.67345	0.618533	0.689636	0.639948	0.591157	0.572244	0.455275	0.681396	0.534541	0.726005	0.74175	0.920613	0.892141	1.01086	1.05868	1.10015
PF10_0057	0.417	0.412624	0.290928	0.316253	0.265473	0.267616	0.264	0.341032	0.342281	0.533353	0.513	0.502073	0.827277	0.664	0.997544	0.863241	1.06425	1.164	1.11611	1.344	1.14909	1.44416	1.78718	1.50424	1.51067	1.715	1.46447	1.74003	1.804	1.66405	1.25311	1.27326	1.32541	1.13769	1.12339	0.8927	0.460508	0.634774	0.370767	0.405364	0.366626	0.381942	0.48109	0.557004	0.577806	0.481883
PF10_0058	0.825	1.01122	1.2048	0.97153	1.67443	2.03946	1.155	1.85554	1.15829	2.3523	1.868	2.22383	2.72674	1.674	1.39319	2.09678	1.85779	2.482	2.38272	1.51	1.90803	2.02501	1.69335	1.45465	1.58854	1.098	1.11999	0.843033	0.847	0.569478	0.643436	0.558489	0.676171	0.541909	0.581337	0.672043	0.791498	0.644337	0.420809	0.402757	0.758746	0.720423	0.631502	0.916879	0.824538	1.024
PF10_0060	0.666	0.617193	0.560058	0.450345	0.471275	0.478157	0.306	0.382477	0.334472	0.292882	0.219	0.242647	0.320374	0.26	0.404068	0.258155	0.382518	0.65	0.467991	0.567	0.64468	0.815616	1.42271	1.3395	1.68116	1.44	1.6908	1.80547	1.685	1.5828	1.88153	1.40979	1.90347	1.31868	1.3247	0.919252	0.747017	0.842779	0.682393	0.490086	0.690762	0.688813	0.655614	0.60514	0.551371	0.625084
PF10_0062	1.866	1.31226	2.07884	1.06894	1.09599	1.21125	1.111	1.22736	1.2598	1.10524	1.2715	0.875723	0.985328	0.568	0.941984	0.746429	0.808878	1.3295	1.12885	1.4405	0.960981	0.962933	1.31851	1.28152	1.20288	1.272	0.990182	0.966834	0.9765	0.690972	0.729727	0.936436	0.648277	0.722366	0.742874	0.766349	0.672446	0.877446	0.930897	1.13723	1.68199	1.79842	1.99612	2.64233	2.66622	1.64568
PF10_0063	1.661	1.41803	1.47979	1.17646	1.57457	1.50296	1.232	1.45531	1.95087	1.8914	1.507	2.07282	1.58478	1.387	1.58597	1.47183	1.34155	1.693	1.45497	1.442	1.50023	1.45352	1.337	1.25633	1.03525	1.071	1.19238	0.835503	0.947	0.842557	1.04769	0.676109	0.673285	0.669037	0.774789	0.573159	0.510222	0.48654	0.542502	0.63998	0.974836	1.08524	0.872621	0.764448	1.11911	0.870571
PF10_0064	0.42	0.330099	0.396568	0.46426	0.426217	0.476889	0.405	0.368267	0.409956	0.423908	0.567	0.429795	0.737572	0.935	0.940301	1.0735	1.27908	1.399	2.02083	1.375	2.11332	2.16531	1.47774	1.91128	2.18199	1.608	1.20736	1.23264	0.853	1.2345	1.10209	0.813469	0.725224	0.642103	0.643202	0.646407	0.51153	0.692155	0.503833	0.465321	0.68105	0.554475	0.532758	0.424057	0.431781	0.422784
PF10_0065	0.466	0.397514	0.352784	0.351674	0.284957	0.34752	0.157	0.259326	0.352692	0.386912	0.523	0.347192	0.654987	0.693	1.11708	0.941506	1.3558	1.402	1.37272	2.514	1.55039	1.93148	2.56935	2.58463	2.44428	2.321	1.40206	1.41103	1.68	0.825254	1.1171	1.10711	0.947408	0.620556	0.621598	0.436736	0.595259	0.392101	0.33096	0.418398	0.449177	0.380625	0.461571	0.822899	0.514864	0.745555
PF10_0066	0.569	0.5707	0.557543	0.665397	0.591833	0.769871	0.589	0.780347	0.882381	1.07133	0.866	1.01576	1.35554	1.213	1.192	1.28143	1.48294	1.379	1.99698	1.918	2.00278	1.80708	2.18323	1.80092	1.75001	1.774	1.34215	1.1905	1.042	0.923804	0.939829	0.583165	0.653087	0.604396	0.621598	0.59788	0.660672	0.643142	0.6369	0.629552	0.60214	0.539988	0.474201	0.597118	0.57403	0.561439
PF10_0068	1.563	1.52497	1.52423	1.75078	1.56117	1.59935	1.545	2.09474	2.00943	2.39701	1.726	1.68175	2.47613	1.438	1.6954	1.55477	1.5498	1.581	1.36861	1.384	1.34602	1.16758	1.29821	1.10678	1.04345	0.968	0.798803	0.720755	0.606	0.571735	0.496177	0.418661	0.423208	0.390002	0.405561	0.37173	0.378087	0.503157	0.484044	0.732523	1.0149	1.01807	1.19756	1.24123	1.39605	1.32063
PF10_0069	0.57	0.627654	0.527779	0.470585	0.498065	0.508597	0.44	0.49793	0.309744	0.517168	0.4735	0.398173	0.514022	0.498	0.524447	0.464912	0.601726	0.6395	0.833583	0.936	0.98792	1.12381	1.39248	1.53302	1.86559	1.664	1.86387	1.73824	1.9655	1.3921	1.46977	1.06434	1.56875	1.34777	1.37969	1.03095	0.675063	0.707097	0.657372	0.70124	0.821266	0.817225	0.684319	0.751268	0.724461	0.666567
PF10_0070	1.033	0.905449	0.762953	0.753948	0.600358	0.744504	0.448	0.684432	0.619489	0.892519	0.813	0.798928	1.05367	0.906	1.2021	1.14826	1.22428	1.374	1.28225	1.743	1.41105	1.24428	1.7123	1.37628	1.34018	1.43	1.51856	1.38503	1.394	1.19989	1.04769	0.850483	0.794477	0.748761	0.778716	0.584146	0.605725	0.673028	0.616428	0.874595	1.01733	1.21563	0.977106	0.965015	1.02343	0.871708
PF10_0073	1.03	1.13908	1.47057	1.25806	1.10329	1.38215	0.9275	1.26288	1.17716	1.375	1.1965	1.21323	1.57197	1.026	1.19158	0.961948	1.19249	1.2685	1.08074	1.287	1.1045	1.30901	1.54766	1.16436	1.2705	1.2525	1.1591	1.26536	1.2895	0.980601	0.881207	0.792906	0.804576	0.76546	0.716851	0.507237	0.507605	0.611463	0.49246	0.553954	0.706544	0.843566	0.941512	1.07046	1.06183	0.951548
PF10_0075	0.317	0.309178	0.290928	0.273243	0.179011	0.161077	0.217	0.30906	0.295428	0.63355	0.648	0.735685	1.33845	1.01	1.39824	1.42044	1.80956	1.587	2.19109	1.919	1.78912	1.8501	1.77996	1.67777	1.68034	1.445	1.25146	1.39758	1.299	1.17883	1.01955	0.786326	0.870462	0.755225	0.872005	0.564003	0.4435	0.493713	0.307077	0.351924	0.388478	0.335846	0.377753	0.409157	0.429263	0.40119
PF10_0076	1.04	1.16232	1.32674	0.929785	1.25673	1.39896	0.537	1.50149	0.927932	1.27327	1.325	1.11127	1.67449	1.1963	1.04469	0.852728	0.956843	1.171	1.86538	1.187	1.19925	1.85571	1.92701	1.29711	1.87379	1.331	0.843735	1.08293	0.965	0.822245	0.741921	0.499268	0.521315	0.551605	0.415381	0.659225	0.64615	1.09621	0.671019	0.666048	1.32811	1.1827	0.647577	1.50254	1.69188	1.34336
PF10_0077	0.948	1.05423	1.31211	1.08285	1.59892	1.33047	1.092	1.63056	1.48625	1.9099	1.488	1.67271	1.93363	1.449	1.72234	1.58864	1.76134	1.851	1.56847	1.508	1.52995	1.57885	1.03297	1.36349	1.26067	1.059	0.943585	0.842674	0.721	0.800429	0.790694	0.519008	0.567483	0.550528	0.587229	0.542945	0.375471	0.443505	0.385552	0.413184	0.642202	0.733593	0.65217	0.489384	0.687325	0.668271
PF10_0078	0.765	0.871741	0.887038	1.00822	0.944985	0.956314	0.904	1.08941	0.793883	1.33184	1.216	1.21194	1.43385	1.094	1.20631	1.03729	1.2736	1.219	1.2477	1.069	1.05434	1.13363	1.11868	1.14117	1.11968	1.279	1.2032	1.44779	1.341	1.49328	1.13305	0.946717	1.04648	1.1797	1.3139	0.978766	0.791498	0.756708	0.630076	0.676475	0.672552	0.621644	0.772729	0.58451	0.867339	0.768285
PF10_0079	1.034	1.08561	1.01615	1.4497	1.08868	1.05778	0.805	0.973361	0.842036	1.19927	1.177	1.24163	1.63177	1.203	1.28544	1.20784	1.24072	1.337	1.0758	1.077	0.891776	0.920375	0.918399	0.790104	0.866401	0.88	0.924447	1.15106	1.108	1.19387	0.759742	1.01252	1.1821	1.19479	1.22061	0.975103	1.01914	1.13685	0.866639	1.0271	0.960268	0.914028	1.2056	1.44752	1.19967	1.0956
PF10_0080	0.903	0.926371	0.782237	0.831114	0.769627	0.754651	0.295	0.723508	0.689767	0.658214	0.521	0.45819	0.479849	0.472	0.505085	0.457903	0.509659	0.483	0.481151	0.539	0.570365	0.512566	0.793901	0.883668	1.13198	1.036	0.986854	1.64321	1.189	1.42181	1.57857	1.4065	1.6784	1.66667	1.83926	1.16463	0.972038	1.25401	0.658509	0.852437	0.854651	0.846859	0.902474	0.857282	0.793067	0.648951
PF10_0081	0.752	0.721802	0.779721	0.732443	0.667335	0.585964	0.658	0.717588	0.73792	0.84165	0.81	0.753754	1.05652	0.723	0.816555	0.683351	0.699274	0.892	0.730362	0.741	0.653969	0.790362	1.07628	0.830888	0.947549	1.171	1.25312	1.32138	1.612	1.40752	1.62922	1.25681	1.48027	1.60203	1.71161	1.47685	1.19837	1.00536	0.777928	0.761198	0.642202	0.73491	0.634947	0.701413	0.77922	0.636449
PF10_0082	1.122	1.10421	1.21905	1.23845	1.26404	1.27213	0.997	1.19124	1.15048	1.44745	1.104	0.895728	0.898471	0.799	0.732374	0.629617	0.598438	0.648	0.72625	0.702	0.645608	0.665962	0.905769	0.869274	0.925418	1.007	1.12165	1.19947	1.368	1.40903	1.47915	1.49205	1.68995	1.68175	1.87167	1.5565	1.20883	1.1524	0.897346	0.968442	0.886215	0.982514	1.0104	1.01659	1.07253	1.15811
PF10_0083	1.795	1.01238	1.68856	0.987975	1.14226	1.4573	1.332	1.25755	1.32748	1.19311	1.346	1.12934	0.992447	1.36	1.25009	1.12023	1.12015	0.971	0.798135	0.706	0.85276	0.657544	0.84352	0.763714	0.691809	0.701	0.76918	0.995969	1.004	0.660504	1.01299	0.910526	0.986844	1.03857	1.36398	0.971441	1.08586	1.21097	1.85042	1.98772	1.70445	2.03747	1.8038	1.51744	1.64278	1.57407
PF10_0084	0.617	0.484688	0.505561	0.44149	0.297134	0.225761	0.257	0.196567	0.223849	0.188061	0.158	0.143265	0.170866	0.255	0.37208	0.337587	0.439512	0.62	0.724605	0.932	1.07013	1.04665	1.30543	1.3203	1.3246	1.722	1.73573	1.70507	1.702	1.87318	2.38428	1.72646	1.33118	1.37039	1.38068	1.19484	1.05446	0.879837	0.600505	0.59827	0.603355	0.470184	0.549981	0.358729	0.480876	0.53189
PF10_0085	1.936	2.04336	1.72712	2.40099	2.08359	2.31088	1.794	2.31262	2.16561	2.78084	2.177	2.14123	2.89903	1.638	1.87976	1.76503	1.57391	1.488	1.23043	1.157	1.04784	0.965271	1.01493	0.809296	0.686071	0.71	0.596606	0.476021	0.411	0.440086	0.332035	0.268141	0.296245	0.353372	0.415381	0.361658	0.520688	0.62521	0.603917	1.06489	1.41673	1.4685	1.39045	1.59193	2.0091	1.36609
PF10_0086	0.787	0.689257	0.933989	1.00442	0.95838	1.13134	0.907	1.21611	1.43159	1.51528	1.2	1.51267	1.75138	1.201	1.17011	1.27909	1.42376	1.21	1.24441	1.323	1.47515	1.2412	1.80612	1.13397	1.24673	1.372	1.31969	1.18961	1.387	0.858355	1.28312	0.873513	0.817561	0.687352	0.657932	0.521886	0.6018	0.540335	0.498147	0.664745	0.831585	0.84159	0.864584	1.44638	1.00707	1.24108
PF10_0087	1.698	1.7214	2.03482	1.79885	1.7962	2.25761	1.852	1.80107	2.23328	2.3261	2.519	1.82889	2.2056	1.604	2.02371	1.62836	1.46321	1.461	1.95092	1.615	1.22991	1.32257	1.23145	0.995626	0.877876	0.925	0.759695	0.512776	0.538	0.696614	0.656567	0.482817	0.532857	0.522517	0.476264	0.571328	0.629274	0.73519	0.504971	0.720792	0.978478	1.09973	0.972514	0.974184	1.12162	0.851251
PF10_0089	1.27	1.3111	1.55274	2.3719	1.66955	1.79341	2.084	1.91238	2.13177	2.24748	2.495	1.87535	2.04185	2.151	1.63227	1.35852	1.37882	1.434	1.44345	1.366	1.08035	0.913827	0.996887	0.900462	0.847548	0.837	0.683975	0.629316	0.593	0.502525	0.384561	0.436757	0.362612	0.390002	0.534201	0.359827	0.315291	0.520012	0.317313	0.522672	0.73568	0.96671	1.22741	1.57359	1.7586	1.21948
PF10_0090	1.057	1.27274	1.46722	1.70903	1.09355	0.83075	1.075	1.23861	1.46673	1.46133	1.698	0.795056	0.993871	0.888	0.878849	0.587565	0.66968	0.739	0.946674	0.889	0.784019	0.906344	1.32166	1.30111	1.32542	1.63	1.30554	1.25774	1.323	1.10586	1.06833	1.28395	1.26674	1.10213	1.05662	0.75994	0.634507	0.633578	0.437869	0.492693	0.598499	0.66379	0.84162	1.00627	0.896292	1.00241
PF10_0091	1.071	1.04958	1.21905	1.20176	1.55265	1.25691	1.101	1.24098	1.44461	1.4382	1.25	1.49847	1.61041	1.211	1.34942	1.23003	1.22318	1.357	1.15394	1.166	1.21504	1.45726	1.31715	1.25633	1.30739	1.279	1.22233	0.975351	1.078	0.921547	1.15087	0.765763	0.867576	0.672269	0.707031	0.490756	0.422568	0.509254	0.421946	0.371475	0.492881	0.601889	0.730246	0.703705	0.706207	0.975131
PF10_0093	0.506	0.309759	0.362151	0.335228	0.30505	0.424888	0.352	0.522797	0.503009	0.884041	0.6865	0.893147	1.37334	1.2885	1.33343	1.77554	1.94602	1.873	2.14544	2.009	2.46028	2.30842	2.14173	2.24156	2.14551	1.4495	1.63505	1.12416	0.9915	0.734228	0.746611	0.508316	0.485727	0.446563	0.488048	0.405606	0.370892	0.381342	0.205855	0.333024	0.294393	0.293701	0.311733	0.327784	0.304639	0.364253
PF10_0094	1.435	1.37038	0.921413	0.972795	0.611317	0.750846	0.571	0.571939	0.465918	0.376122	0.412	0.189729	0.186529	0.311	0.184356	0.0747597	0.0734347	0.236	0.0937627	0.164	0.082675	0.0869866	0.151563	0.179932	0.236068	0.41	0.516725	0.893773	1.176	1.19162	1.79149	1.96993	2.747	3.17388	3.6039	3.44994	3.03255	2.86903	1.75375	2.70069	1.62311	1.82937	1.61665	1.75812	2.15513	1.47292
PF10_0095	1.224	1.39595	1.52507	1.72801	1.28596	1.67165	1.278	1.84962	1.92874	2.15037	1.784	1.72692	2.24119	1.296	1.59944	1.34334	1.52788	1.417	1.26168	1.372	1.11379	1.14018	1.088	1.0604	0.99591	0.901	0.708105	0.662485	0.686	0.607845	0.483984	0.508315	0.537666	0.410472	0.401633	0.530127	0.469666	0.602497	0.470851	0.626946	0.795165	1.03388	1.05863	1.6882	1.65159	1.66045
PF10_0097	1.446	1.58308	1.13185	1.35356	0.9803	1.03875	0.853	0.917707	1.01253	0.949554	0.888	0.837648	0.83582	0.665	0.752577	0.616768	0.726675	0.781	0.765729	0.956	0.90571	0.914763	1.32978	1.0644	1.24591	1.119	1.09919	1.13134	1.143	0.941858	1.04769	0.792084	0.888736	0.897436	0.956456	0.705004	0.786265	0.826043	0.79385	1.12094	1.23584	1.55411	1.45246	1.73749	1.92728	1.40132
PF10_0098	2.1765	2.21829	2.18322	1.84818	1.86501	1.92404	1.3645	1.5755	1.36001	1.52838	1.0755	0.979622	0.95329	0.6165	0.692809	0.634874	0.659816	0.601	0.607401	0.704	0.651182	0.737983	0.645947	0.822491	0.805335	0.7995	0.704777	0.606457	0.584	0.591294	0.665009	0.612364	0.658858	0.807477	0.842546	0.677079	0.800002	1.09741	1.49273	1.99554	3.54486	3.68443	2.76081	2.11283	3.25409	2.65206
PF10_0099	1.141	1.47673	1.41649	1.89309	1.85161	1.37549	1.3275	1.95205	1.38084	2.0679	1.6065	1.91794	2.53238	1.393	1.71013	1.58339	1.58597	1.4865	1.5368	1.486	1.32559	1.24494	1.42541	1.10399	1.11353	0.939	0.782577	0.615421	0.6235	0.4777	0.340477	0.349981	0.340971	0.302736	0.359899	0.347466	0.387245	0.441712	0.374179	0.504424	0.771493	0.800762	0.919123	1.54551	1.46214	1.16322
PF10_0100	3.686	2.63615	2.23101	1.685	2.17614	1.71731	1.387	1.31558	1.49666	1.04204	0.773	0.889275	0.545348	0.335	0.327464	0.263995	0.207152	0.245	0.152159	0.107	0.105898	0.13843	0.150661	0.177533	0.17869	0.244	0.346148	0.354102	0.396	0.601826	1.08896	0.877626	1.16575	1.71407	1.90113	1.45579	1.87735	2.02626	2.62039	4.13445	5.16433	6.32181	3.46523	1.90825	2.59195	2.45147
PF10_0103	0.887	0.972864	1.17377	0.896894	1.26526	1.75409	1.115	1.57846	1.74003	2.07946	1.493	1.90504	2.17	1.556	1.37636	1.51272	1.6594	1.427	1.52981	1.518	1.30329	1.53676	1.08169	1.51143	1.26067	1.102	0.977701	0.862396	0.702	0.827511	0.815081	0.593857	0.653087	0.4805	0.565625	0.477938	0.392478	0.372974	0.327548	0.372778	0.528087	0.584767	0.608538	0.493969	0.602983	0.650087
PF10_0107	0.6785	0.631141	0.498435	0.407967	0.306877	0.18137	0.1935	0.233867	0.182203	0.210413	0.2145	0.152945	0.192936	0.20095	0.357769	0.232456	0.287162	0.6325	0.765318	0.9145	0.853689	1.00035	1.29325	1.49264	1.74715	1.603	1.44908	1.7862	1.769	1.59371	1.93734	1.31068	1.5904	1.43611	1.41995	1.25527	0.991008	0.994599	0.541365	0.595663	0.598499	0.613084	0.586149	0.645769	0.632566	0.653497
PF10_0108	0.796	0.832223	0.670728	0.993035	0.630802	0.701381	0.754	1.16401	1.09452	1.27327	1.171	0.87895	1.10493	1.035	1.17685	1.05365	1.4402	1.217	1.8185	1.696	1.36089	1.2889	1.27024	1.50344	1.60329	1.781	1.18905	1.43793	1.075	0.957656	1.27749	1.05035	1.16671	1.02456	0.870041	0.796563	0.863452	0.717259	0.441281	0.501817	0.817017	0.671692	0.887548	0.910003	0.823279	0.773967
PF10_0112	1.476	1.49358	1.11425	1.75837	1.39312	1.50677	0.98	1.209	1.68537	1.4937	1.231	1.16032	1.45521	1.029	1.43781	1.26507	1.15851	1.221	1.35216	1.665	1.43985	1.25616	1.90356	1.21394	1.37214	1.409	1.07339	1.09996	0.939	0.756797	0.707217	0.751781	0.549208	0.411549	0.433057	0.433074	0.409486	0.590543	0.495872	0.671262	1.0064	1.15241	1.24578	1.30885	1.54837	1.15129
PF10_0114	0.676	0.88104	1.03041	1.27513	1.08625	1.08315	0.921	1.36176	1.0763	1.62318	1.355	1.412	2.04612	1.239	1.32417	1.29428	1.71859	1.395	1.32995	1.624	1.05898	1.5405	1.43714	1.25713	1.36395	1.306	1.15993	0.944871	1.244	0.859107	0.865731	0.752603	0.82237	0.690584	0.806212	0.562172	0.401636	0.408837	0.370767	0.372778	0.494095	0.587401	0.611983	0.936363	0.95294	0.914895
PF10_0115	0.695	0.928695	1.20983	0.834909	1.05215	1.22647	0.714	1.53109	0.57524	1.7018	1	1.41716	2.4206	1.148	1.12802	1.48935	1.95972	1.13	1.39493	1.505	1.48165	1.90529	1.33159	1.48424	1.65493	1.153	1.34299	1.1143	0.929	0.652229	0.468977	0.408791	0.56556	0.535445	0.416363	0.556679	0.39117	0.480563	0.44583	0.600877	0.683478	0.994367	0.801434	1.1885	1.36206	1.07514
PF10_0116	0.8045	0.664848	0.603655	0.650849	0.51755	0.46484	0.3885	0.339256	0.444444	0.369956	0.3705	0.471096	0.455643	0.454	0.578744	0.471921	0.560624	0.714	0.598354	0.677	0.787271	0.684669	1.01764	0.872073	0.874188	1.101	1.16908	1.50606	1.57	1.5403	1.89467	1.69685	1.67167	1.84928	1.85056	1.48554	1.65887	1.49429	1.05259	0.980824	0.898962	0.848176	0.801434	0.939801	0.856639	0.723392
PF10_0117	0.813	0.794447	0.614135	0.638832	0.596095	0.506694	0.459	0.58082	0.557019	0.726039	0.668	0.694383	0.875689	0.6815	0.806032	0.661741	0.793533	0.8375	0.778477	0.8155	0.73107	0.863786	1.22874	0.939647	1.04017	1.205	1.28849	1.06813	1.4925	1.36201	1.37223	1.39005	1.63224	1.6936	1.85841	1.6151	1.52674	1.60726	1.1032	1.08901	0.897141	0.82842	0.932901	0.853844	0.986299	0.905803
PF10_0118	1.14	0.960078	0.716002	0.694492	0.594269	0.584696	0.494	0.555361	0.47633	0.453196	0.433	0.36268	0.599455	0.662	0.707961	0.716058	0.879024	1.239	1.31926	1.314	1.3228	1.41704	2.39253	1.46985	1.66313	1.575	1.50774	1.5204	1.272	0.984738	1.21465	1.00676	1.30425	1.23465	1.26971	1.11336	1.27948	1.25759	0.85754	0.814638	0.912923	0.932466	0.801434	0.88135	1.01966	0.80579
PF10_0119	1.345	1.38433	0.567604	1.07526	0.756231	0.615136	0.424	0.454709	0.382625	0.246637	0.192	0.144556	0.125302	0.064	0.0757628	0.0432205	0.0779406	0.095	0.0766551	0.042	0.0297259	0.0402196	0.0523253	0.0727727	0.131149	0.216	0.398569	0.732409	0.941	1.27362	1.95282	2.30305	2.73546	3.26654	3.10996	3.07455	4.49649	3.89471	2.85126	2.55601	1.89262	1.72401	1.76935	1.89794	2.20926	1.43428
PF10_0120	0.832	0.692744	0.560896	0.52751	0.509025	0.489572	0.305	0.32327	0.322759	0.23893	0.233	0.187148	0.220702	0.176	0.193616	0.240633	0.318948	0.346	0.397258	0.567	0.646537	0.736113	1.18363	1.14357	1.37542	1.501	1.63422	1.81892	2.044	1.64524	2.0438	1.41308	1.94676	1.91338	2.12699	1.61968	1.77662	1.37833	1.13505	1.66447	1.13508	1.22222	1.04026	1.00398	1.1254	0.904667
PF10_0121	0.292	0.267334	0.249846	0.298543	0.222851	0.262542	0.306	0.42629	0.745729	0.860148	0.961	1.37328	1.89804	1.704	2.04391	2.1657	2.4343	2.246	2.0488	2.981	2.10589	1.8342	2.91759	1.74814	2.02625	2.14	1.48195	1.2918	1.442	0.935088	1.14899	0.620178	0.552094	0.40293	0.413417	0.36532	0.349306	0.280926	0.239975	0.307607	0.203951	0.2318	0.233082	0.283086	0.275685	0.293221
PF10_0122	0.88	1.12048	0.989324	1.22327	1.24821	1.0451	0.986	1.32505	1.0789	1.65864	1.473	1.33714	1.66167	1.497	1.45717	1.36203	1.61447	1.573	1.83989	1.79	1.60705	1.68922	1.48676	1.42187	1.26886	1.509	1.23565	1.03003	0.969	1.00806	0.961402	0.713122	0.603071	0.650722	0.618652	0.599711	0.520688	0.702913	0.407161	0.611304	0.769672	0.799445	0.754358	0.662445	0.784255	0.881936
PF10_0123	0.942	1.12861	1.75395	2.07968	1.61232	1.51818	1.652	1.95856	1.9756	2.37543	1.983	1.90504	2.46759	1.65	1.68109	1.66924	1.61227	1.657	1.75106	1.729	1.55132	1.4741	1.5878	1.22434	1.1705	1.188	0.826261	0.774543	0.749	0.479957	0.425831	0.319137	0.279894	0.238095	0.319146	0.301229	0.27866	0.325157	0.221778	0.337586	0.514733	0.638766	0.795693	1.28363	1.3029	1.01718
PF10_0125	0.82	0.695069	0.917221	0.555341	0.65881	0.655722	0.458	0.50089	0.473727	0.450113	0.724	0.61178	0.902742	0.726	0.967239	0.695032	0.87464	1.212	1.89746	1.486	1.67301	2.37389	2.51973	1.94807	2.00575	1.736	1.53603	1.59212	1.286	0.856098	1.12554	0.959877	0.827179	0.77785	0.836654	0.624432	0.51153	0.487736	0.483361	0.669958	0.739322	0.862663	1.00926	0.879058	1.06246	0.931943
PF10_0126	1.48	1.33202	1.08239	1.66855	1.45766	1.229	1.229	1.67911	1.8897	1.87907	1.261	1.49847	1.94218	1.181	1.46306	1.32815	1.45773	1.272	1.32913	1.341	1.52624	1.28422	1.31896	1.0732	1.03689	0.941	0.788818	0.67145	0.655	0.704889	0.621863	0.573294	0.61269	0.586081	0.586247	0.568581	0.689454	0.77703	0.809773	1.27866	1.17393	1.24461	1.2986	1.38907	1.58236	1.3195
PF10_0127	1.044	1.02982	0.906321	1.33712	0.593051	1.05397	0.863	1.81884	1.46153	1.85286	1.469	0.653082	0.763202	0.742	0.81908	0.700873	1.25058	0.79	1.25757	1.879	1.29307	1.19911	0.944562	0.900462	1.24181	1.387	0.797138	0.733306	0.973	0.694357	1.04769	1.25187	1.39081	1.10429	0.981988	1.04011	1.02437	0.847561	0.650548	1.34513	1.04403	1.1208	1.60402	1.83834	1.75104	1.51043
PF10_0128	0.93	0.928695	0.901291	1.14357	1.24577	0.867532	0.929	1.24808	1.55393	1.28406	1.006	1.41071	1.11348	0.895	1.14318	1.02911	0.697081	0.938	0.687593	0.579	0.816532	0.669703	1.09973	0.658153	0.642628	0.664	0.614912	0.715377	0.771	0.533369	0.946395	0.494333	0.663667	1.01487	0.783626	0.74529	1.08586	0.920482	0.982645	0.728612	0.621564	0.877151	0.622317	0.566173	0.648301	0.714869
PF10_0129	0.872	0.898475	0.509753	0.92346	0.734312	0.433766	0.424	0.395502	0.40475	0.428533	0.729	0.646628	0.961122	0.843	1.17937	1.19966	1.52021	1.626	1.65236	1.504	1.71667	1.5536	1.32888	1.10519	0.871319	1.104	0.958563	1.02376	1.032	1.154	1.164	1.3407	1.28982	1.44581	1.50441	1.13533	1.7099	1.74892	0.974684	1.40509	0.990618	1.05495	1.06666	0.797685	0.981893	0.834203
PF10_0131	1.493	1.69292	1.22072	1.33459	0.892012	0.604989	0.5645	0.70101	0.613632	0.674399	1.098	0.625332	0.720485	0.5915	0.763942	0.554857	0.631867	0.8005	1.15147	0.6045	0.626565	0.710858	0.969371	0.926452	1.00821	1.2055	1.09128	1.28194	1.5475	1.05169	1.35534	1.33001	1.41775	1.38817	1.34287	1.15822	1.30172	1.48891	1.44838	1.6964	1.52963	1.57123	1.44557	1.28344	1.4313	1.153
PF10_0132	1.441	1.48429	1.42781	1.18658	1.12887	1.29876	0.82	1.00889	0.869367	1.059	0.945	0.810544	0.924101	1.022	1.17264	1.04313	1.26483	1.502	1.35133	1.304	1.09521	1.461	1.01132	1.50104	1.24181	1.022	0.865369	0.982522	0.813	1.20365	1.01487	0.926154	1.12246	1.19155	1.19803	1.21041	1.03745	1.21814	1.06908	1.39727	1.54784	1.47772	1.18837	0.587949	0.798103	0.818292
PF10_0133	0.511	0.514909	0.445196	0.339023	0.331232	0.277762	0.222	0.216697	0.147064	0.18652	0.118	0.156172	0.222126	0.188	0.285373	0.341091	0.521715	0.672	0.617682	0.769	0.755223	1.08687	1.33249	1.34749	1.52296	1.527	1.99617	2.04483	2.031	2.06803	1.57295	1.38841	1.77843	1.94786	1.86774	1.39078	1.13819	1.06872	0.682393	0.736433	0.573005	0.675643	0.533906	0.503137	0.555147	0.514842
PF10_0135	1.371	1.42152	1.04047	0.645789	0.986389	0.811091	0.514	0.753704	0.376118	0.492504	0.2875	0.307181	0.381601	0.2465	0.196141	0.165873	0.190711	0.237	0.0994687	0.161	0.162563	0.214193	0.141639	0.188729	0.286478	0.309	0.50258	0.901393	0.913	1.04831	1.42194	1.36702	2.56137	3.07477	3.42272	3.36708	2.97499	3.80446	2.34516	2.43153	1.85316	2.31273	1.32673	1.55698	1.50305	1.08537
PF10_0136	0.929667	1.11583	1.17964	1.1967	1.34401	1.12289	1.06767	1.68898	0.999511	1.70694	1.17267	1.28766	1.45046	0.990333	0.747246	1.04936	0.986801	0.692	0.836188	0.749667	0.800431	0.967453	0.818259	1.15823	1.12323	0.831667	0.932214	1.03571	0.866667	0.81046	0.813518	0.741636	0.898675	0.954895	0.89099	0.685777	0.570838	0.776233	0.53909	0.604353	0.773718	1.08656	0.883721	1.02805	1.02176	1.04559
PF10_0138	2.984	2.46877	1.09999	1.53509	0.962034	0.925874	0.804	0.602726	0.555067	0.447801	0.372	0.237484	0.187953	0.1485	0.132585	0.0572379	0.0438416	0.118	0.067352	0.04885	0.0269391	0.0318016	0.0577833	0.0433171	0.0122952	0.0555	0.0428524	0.14433	0.228	0.693605	0.982037	1.49575	2.24637	3.40552	3.24105	3.28926	4.19494	6.00883	5.2277	5.7533	4.46264	3.71604	2.45941	1.46414	1.71139	1.52748
PF10_0139	0.961	0.878715	1.0128	1.13851	1.18123	1.06666	1.027	1.46715	1.62681	1.79275	1.625	1.96828	1.94787	1.653	1.95973	1.65756	1.82929	1.621	2.0891	1.715	1.95819	1.07938	1.60855	0.934849	1.01394	0.972	0.882843	0.770061	0.672	0.481461	0.48117	0.307621	0.355879	0.381383	0.385921	0.43399	0.272118	0.487736	0.384414	0.39233	0.62642	0.534719	0.525869	0.899688	0.935316	0.85807
PF10_0140	0.555	0.599758	0.441004	0.273243	0.306877	0.218151	0.184	0.236828	0.124939	0.18652	0.114	0.109707	0.222126	0.23	0.264328	0.266332	0.424167	0.587	0.544482	0.712	0.743146	1.10464	1.36948	1.45625	1.96149	1.677	2.20836	1.95429	2.01	2.09661	1.19777	1.22391	1.69668	1.60095	1.36005	1.36514	0.625349	0.930045	0.549326	0.574809	0.72961	0.778372	0.585575	0.650984	0.662148	0.571668
PF10_0141	0.847	0.926371	1.24839	1.63313	1.46253	1.50169	1.438	1.47662	1.72962	1.76346	1.789	1.29842	1.6574	1.216	1.49505	1.25106	1.63091	1.315	1.68444	1.624	1.65164	1.47503	1.54991	1.57941	1.41804	1.422	1.32385	1.05603	0.911	0.905749	0.927636	0.682689	0.60788	0.478345	0.540093	0.530127	0.603108	0.687373	0.429907	0.608698	0.631276	0.71252	1.00811	1.11515	1.08512	0.945581
PF10_0142	1.732	1.68537	2.36264	2.64514	1.50881	1.82511	1.606	1.38307	1.29364	1.32568	1.847	0.908635	1.19464	1.689	1.48327	0.927488	0.994108	1.234	1.28051	1.169	1.21597	1.02887	1.37399	1.27952	0.931975	1.145	1.05592	1.27387	0.97	0.915528	0.703465	0.744378	0.720415	0.691661	0.692302	0.834102	0.57956	1.09143	0.657372	0.814638	1.38152	1.20114	1.53742	1.40535	1.79636	1.14447
PF10_0143	0.853	0.935669	0.937342	0.985445	1.03145	0.927143	0.735	0.756664	0.740523	0.998882	0.865	1.04287	1.40822	0.896	1.14486	0.929824	1.02699	1.267	0.917888	1.045	0.854618	0.920375	1.22604	0.857278	0.940991	1.013	1.23648	1.32945	1.329	1.40526	0.954836	1.06434	1.109	1.20556	1.12732	1.05384	0.854294	1.04839	0.7131	0.776839	0.713828	0.741495	0.970217	1.20111	1.13421	1.0365
PF10_0144	0.22	0.129018	0.206249	0.160657	0.143696	0.218151	0.229	0.236828	0.407353	0.642799	0.798	1.14483	1.83681	1.619	1.91427	2.2241	2.63488	2.503	3.14105	3.505	3.23733	2.56003	3.10975	2.06083	1.69674	1.812	1.13663	0.799644	0.825	0.449113	0.499929	0.378358	0.326062	0.242405	0.30638	0.387295	0.402944	0.326353	0.287742	0.277629	0.303498	0.194922	0.243415	0.322054	0.27065	0.212529
PF10_0147	1.037	1.14837	0.623777	0.98165	0.708739	0.712796	0.557	0.592069	0.625996	0.582681	0.929	0.463352	0.693431	0.736	1.04216	0.802499	0.9963	1.376	1.19671	1.616	1.0274	1.31976	1.30903	1.11958	0.9205	1.107	0.912798	0.926942	1.082	0.99527	1.39192	1.52988	1.96118	1.96725	2.04646	1.47044	1.63925	1.6748	1.15666	1.19915	1.01975	0.896906	1.139	1.38563	1.26765	1.20243
PF10_0148	1.106	1.07747	1.16958	1.27513	1.29935	1.19603	0.777	0.73535	0.700178	0.812362	0.808	0.931867	1.03944	0.836	1.00259	0.670501	1.18044	1.034	1.17944	1.261	0.987456	0.954047	1.5039	1.18995	1.25001	1.217	1.38043	1.45944	1.501	1.17883	1.17901	0.894076	1.33503	1.00948	1.21079	0.788323	0.681604	0.566634	0.545914	0.497907	0.899569	1.01544	0.905919	1.1163	1.17575	0.885346
PF10_0149	0.685	0.747373	1.19306	1.03858	1.22994	1.32286	1.216	1.74305	1.52009	2.05172	1.678	1.69982	2.11874	1.608	1.47064	1.9788	1.97835	1.751	1.983	1.768	1.53831	1.70232	1.30994	1.64498	1.50903	1.022	0.973541	0.863293	0.651	0.657495	0.5684	0.533814	0.488613	0.499892	0.543039	0.470613	0.392478	0.564243	0.34802	0.49921	0.719898	0.684862	0.641836	0.614309	0.570253	0.654633
PF10_0150	0.7995	0.966471	1.11005	1.62744	1.29753	1.45667	1.3835	1.55596	2.25085	2.10413	2.0705	1.83599	2.26398	1.806	1.97615	1.69202	2.05014	2.1725	1.83125	2.4255	1.44635	1.49608	1.79349	1.18835	1.00288	1.271	0.958979	0.623938	0.65	0.528855	0.378464	0.288292	0.248635	0.204697	0.270538	0.302145	0.272118	0.255225	0.247367	0.312169	0.372089	0.399723	0.633225	0.715739	0.808803	0.712596
PF10_0151	0.555	0.531181	0.485439	0.407334	0.326361	0.261274	0.18	0.213145	0.143159	0.18652	0.281	0.112289	0.236365	0.188	0.330831	0.259323	0.412111	0.629	0.684303	0.963	0.808172	1.07377	1.63832	1.41067	1.54509	1.756	1.75653	2.15958	2.13	1.97399	1.65924	1.50767	1.46488	1.26912	1.36889	0.905519	0.706461	0.814088	0.501559	0.581326	0.840083	0.798128	0.760099	0.852698	0.675995	0.842158
PF10_0152	0.972	0.788054	0.690011	0.726117	0.583309	0.721675	0.659	0.74127	0.541402	0.710624	0.832	0.66986	0.87996	1.043	1.16338	0.927488	1.22976	1.6	2.36463	1.89	1.14723	1.53583	2.1724	1.6122	1.25329	1.64	1.33799	1.44689	1.101	1.22547	1.11523	0.912171	1.06379	1.02133	1.18035	1.09138	0.965497	1.13446	0.741533	0.69733	1.36574	1.03256	0.783063	0.832068	0.772926	0.564848
PF10_0153	0.231	0.175511	0.323626	0.159392	0.186318	0.251128	0.312	0.229723	0.350089	0.502524	0.612	0.903472	1.39256	1.299	1.75349	1.97296	2.25455	2.199	2.86963	2.55	2.65861	2.46181	2.56935	2.23916	1.84756	1.476	1.45282	1.08293	0.856	0.783879	0.662195	0.471302	0.493422	0.477268	0.588211	0.524633	0.576943	0.661073	0.309351	0.39233	0.625206	0.36087	0.434014	0.451563	0.312192	0.398917
PF10_0154	0.456	0.439358	0.392376	0.339023	0.271561	0.202931	0.149	0.15749	0.1796	0.157231	0.078	0.109707	0.158051	0.163	0.299684	0.287358	0.37375	0.648	0.678546	0.899	0.784948	1.00362	1.31715	1.39948	1.3164	1.611	1.43951	1.50964	1.633	1.60011	1.81119	1.53564	1.47834	1.44689	1.16169	0.883544	0.635815	0.751926	0.403749	0.391026	0.39819	0.391162	0.391531	0.244119	0.263097	0.318225
PF10_0155	0.382	0.369618	0.446873	0.770393	0.6101	0.526353	0.911	1.09296	1.52269	1.56306	1.162	1.56946	2.10735	1.58	1.94879	2.01851	2.03754	1.997	1.91638	2.179	2.63167	1.77995	2.27525	1.76814	1.45247	1.606	1.12664	1.08203	0.857	0.695862	0.831026	0.449917	0.383773	0.382461	0.299506	0.306723	0.341456	0.26419	0.221778	0.285449	0.252511	0.223897	0.300825	0.381651	0.460734	0.473927
PF10_0156	2.995	2.50364	1.02202	1.29031	0.96934	0.896703	0.644	0.72114	0.480234	0.428533	0.388	0.313634	0.328917	0.247	0.364503	0.134334	0.214824	0.333	0.191638	0.281	0.237807	0.298373	0.331995	0.371061	0.293445	0.357	0.286238	0.322726	0.499	0.600322	0.99423	1.1688	1.89866	2.0125	2.19278	1.63067	2.50401	3.75724	3.81799	4.6102	3.72089	4.49507	2.71661	2.23604	2.75811	1.65136
PF10_0157	2.434	1.82717	1.98871	1.67614	1.17149	1.72745	1.18	2.50327	1.7127	1.94073	1.584	0.89831	0.919829	0.633	0.804769	0.679846	0.508563	0.595	0.661274	0.539	0.504411	0.522855	0.664892	0.368662	0.63935	0.603	0.324514	0.484986	0.423	0.42504	0.562772	0.678577	0.671362	0.926524	0.794428	0.687608	1.15781	1.3592	1.44212	2.12979	2.27988	2.97125	2.57883	2.99361	3.20374	2.50034
PF10_0158	1.762	1.70629	1.42697	2.30738	1.1313	1.73506	1.581	1.73003	1.99642	1.94073	1.519	1.09449	1.40537	1.164	1.23914	1.05131	1.32511	0.99	1.33817	1.587	1.30329	1.2917	1.28468	1.17396	1.02706	1.072	0.723915	0.62573	0.625	0.656743	0.710968	0.752603	0.776202	0.677656	0.748275	0.515477	0.815047	0.964115	0.888589	1.35425	1.32811	1.32231	1.45246	1.36844	1.40738	1.32745
PF10_0160	0.949	0.840359	1.05304	1.22453	1.21898	1.16939	1.189	1.55122	1.9821	1.88061	1.763	2.20447	2.27252	1.836	2.28383	2.14817	2.38718	1.981	2.47402	2.244	2.27403	1.62375	1.81424	1.30031	1.21722	1.122	0.951074	0.71448	0.647	0.480709	0.454907	0.266496	0.263543	0.221935	0.228803	0.227982	0.27081	0.234304	0.251348	0.333676	0.430968	0.424088	0.528166	0.85499	0.874892	0.908076
PF10_0162	3.059	2.89534	2.93444	2.70586	3.04806	2.92855	2.215	2.27354	2.18253	2.00239	1.829	2.06895	2.16573	1.452	1.63563	1.35035	1.76901	1.857	1.82755	1.105	0.764512	0.745466	0.536785	0.455029	0.334429	0.365	0.24713	0.203497	0.257	0.269317	0.239178	0.411259	0.34049	0.368455	0.476264	0.423918	0.723468	1.01133	0.863227	1.03622	1.85741	1.9321	2.2493	2.77471	2.60579	1.50247
PF10_0163	3.349	3.5416	2.90174	3.19036	2.82399	2.41488	1.607	2.24513	2.09793	2.37234	1.244	1.83405	1.64601	0.72	0.607786	0.80834	0.740923	0.323	0.208087	0.18	0.22666	0.208581	0.118183	0.108759	0.0754105	0.098	0.0723915	0.0439266	0.076	0.112842	0.177273	0.273076	0.508811	0.792933	0.828798	0.778252	1.25593	1.63894	1.66845	3.16471	4.69208	5.55792	3.6053	3.98384	4.47139	2.93107
PF10_0164	0.821	0.692744	0.617908	0.622386	0.463968	0.338642	0.502	0.555361	0.679355	0.610428	0.505	0.627268	0.751811	0.476	0.667555	0.553689	0.602822	0.964	0.911308	0.838	0.848116	0.794104	1.3379	0.990029	1.12788	1.3	1.42287	1.56702	1.747	1.51134	1.51479	1.27572	1.24558	1.42211	1.40522	1.12709	1.05577	1.09262	0.75973	0.771625	0.724754	0.717788	0.779618	1.13808	0.973081	0.878527
PF10_0165	0.584	0.530019	0.589402	0.409864	0.351934	0.305665	0.387	0.243932	0.238165	0.28055	0.486	0.236194	0.373058	0.644	0.782041	0.585229	0.831894	1.111	1.17861	1.336	1.14352	1.34221	2.16969	1.54662	1.81231	1.907	1.888	1.97849	1.867	1.4346	1.4013	0.961522	0.986844	1.02564	1.03796	0.760855	0.652822	0.712477	0.520893	0.967138	0.671338	0.773104	0.579834	0.507722	0.675995	0.508023
PF10_0166	1.221	1.06004	0.65396	0.822258	0.644197	0.520012	0.43	0.369451	0.378721	0.279009	0.207	0.130358	0.155203	0.105	0.140582	0.0712554	0.0898753	0.137	0.152981	0.152	0.112401	0.127206	0.230051	0.202324	0.295084	0.428	0.61824	0.967282	1.121	1.60838	1.95188	2.35075	2.98265	4.00129	4.17639	3.34557	4.1171	3.3484	2.36335	2.65768	1.74572	1.68582	1.37093	1.21257	1.32304	1.03423
PF10_0168	1.227	1.0519	0.653121	0.9437	0.803724	0.670942	0.663	0.884551	0.681958	0.778449	0.699	0.698255	1.06079	0.966	1.19621	0.990567	1.26812	1.422	1.59726	1.663	1.27543	1.24961	1.37038	1.02841	1.00329	1.095	0.897821	1.00314	1.005	0.969693	1.09834	1.16797	1.21961	1.54708	1.51423	1.40543	1.67457	1.81825	1.28631	1.84304	1.62068	1.39211	1.263	1.35125	1.39353	0.996725
PF10_0170	4.272	3.50091	1.97529	2.04047	2.59871	2.20307	1.218	1.64003	1.12835	0.963427	0.626	1.00156	0.545348	0.281	0.416695	0.328242	0.2214	0.35	0.138177	0.157	0.136553	0.185197	0.0757814	0.126353	0.0877056	0.087	0.058246	0.0448231	0.119	0.235465	0.716596	0.910526	1.51008	2.32924	1.87854	2.22946	3.1202	5.22164	4.58227	6.79864	6.92947	7.43602	3.3527	0.99596	1.59621	1.33313
PF10_0171	0.847	1.52729	1.70868	1.18785	3.12356	2.43898	1.329	2.6726	0.58435	2.74076	1.411	2.81238	2.99728	1.622	0.629673	1.49519	1.73832	1.236	1.45497	0.978	1.1333	2.40569	1.07086	1.47385	1.4828	1.026	1.77318	1.368	0.852	0.52735	0.529943	0.621	0.725224	0.754148	0.746311	0.520055	0.42911	0.655096	0.432182	0.892843	0.912923	1.25119	0.717616	0.991376	0.889998	0.972858
PF10_0172	1.388	1.11699	1.52255	1.13978	1.2409	1.20744	1.171	1.17348	0.858955	1.33493	1.203	0.867334	1.23451	0.786	0.927674	0.723067	0.905329	0.869	0.952432	1.146	0.847187	0.982107	1.07357	1.19635	1.4328	1.167	1.53187	1.19947	1.111	1.072	1.23622	1.1359	1.37446	1.22926	1.28935	1.04652	0.562552	1.0723	0.763142	0.886326	1.23706	1.213	1.15622	1.25842	1.45773	1.21607
PF10_0173	0.642	1.08561	0.918059	1.32194	0.753796	0.837092	0.802	0.97573	1.09972	1.18078	1.378	1.11385	1.18894	1.154	1.35026	1.19382	1.40841	1.487	1.57998	2.099	1.37389	1.73131	1.80252	1.80652	1.45083	1.361	1.21069	1.09548	1.043	0.9885	0.757866	0.746023	0.806019	0.787546	0.816032	0.516393	0.333607	0.566634	0.235425	0.286753	0.412758	0.537354	0.656762	0.758718	0.716278	0.714869
PF10_0174	0.682	0.799096	0.687077	0.918399	0.779978	0.825043	0.629	0.883367	0.797787	1.0405	0.935	0.882822	1.1149	0.821	0.904945	0.840463	1.02041	1.0825	1.15394	1.066	1.07106	1.02233	1.38121	1.28192	1.42419	1.5235	1.32967	1.39086	1.573	1.18259	1.44023	1.34728	1.52066	1.28313	1.26333	1.10283	0.9027	0.690361	0.49246	0.557212	0.611245	0.65457	0.609687	0.76101	0.825168	0.717142
PF10_0175	0.811	0.833385	1.00022	0.724852	1.06433	0.873873	0.791	1.0006	0.73792	1.022	0.915	0.760208	0.867145	0.998	0.797193	1.08518	1.04453	0.866	1.19342	1.346	1.90524	2.20553	1.31264	1.96486	1.84428	1.303	1.4237	1.36621	1.047	0.99828	1.85433	1.07667	0.983958	0.915751	1.05269	0.72881	0.569094	0.784203	0.532266	0.563078	0.865577	0.995684	0.691208	0.638377	0.580324	0.617128
PF10_0177	1.936	1.77719	1.50159	1.90005	1.55143	1.53974	1.155	1.46596	1.2611	1.69409	1.118	1.1487	1.19606	0.794	0.932724	0.813012	0.839567	0.722	0.930225	0.802	0.97538	0.78475	0.916595	0.855679	0.802466	0.836	0.778832	0.670554	0.637	0.860612	0.865731	1.10217	1.24846	1.29067	1.04189	1.16371	1.46002	1.39029	1.24878	2.27317	1.69109	1.86098	1.78543	1.39022	1.52067	1.47974
PF10_0178	2.943	2.87907	2.39701	1.66982	1.26282	1.16559	1.149	1.27413	1.40036	1.31643	1.567	0.773114	0.945459	0.817	0.861171	0.452063	0.715714	1.263	0.871006	1.236	0.721781	0.795974	0.820966	0.61417	0.935254	0.975	0.590781	0.513673	0.637	0.399462	0.535571	0.785504	0.767545	0.756303	0.909321	0.678452	0.689454	0.956345	0.909857	1.38814	1.84891	2.2719	1.95995	2.37242	2.45347	1.66159
PF10_0180	1.344	1.35062	1.2442	1.4788	1.16662	1.68179	1.03	1.49675	1.22206	1.76808	1.324	1.69337	2.12443	1.413	1.37131	1.5758	1.70325	1.209	1.70829	1.597	1.76404	1.5087	1.58419	1.25473	1.18116	0.892	0.775504	0.635592	0.699	0.519828	0.556206	0.444159	0.603071	0.601164	0.639274	0.609783	0.711694	0.750731	0.6369	0.956711	1.11566	1.40133	1.18608	1.59766	1.98267	1.34336
PF10_0181	1.835	1.82717	1.54687	1.72674	1.45279	1.93926	1.455	1.62582	1.18952	1.56461	1.573	1.14741	1.33276	1.103	1.21473	0.950851	1.09604	1.119	1.43934	1.236	1.01718	0.958723	1.47503	1.11958	1.0328	0.919	0.799635	0.703723	0.694	0.572487	0.452093	0.792906	0.679056	0.798319	0.820942	0.598796	0.892234	1.22173	0.689217	1.1431	1.6741	1.95449	1.8371	1.89679	2.17653	1.41724
PF10_0182	1.125	1.3111	1.11341	0.98418	0.793982	1.84794	0.8	1.78805	1.21425	1.53532	1.509	0.651791	0.783136	0.624	0.831707	0.798995	0.807781	1.048	1.844	1.904	1.82628	1.7865	1.85845	1.64418	2.05985	1.653	1.42952	0.961007	0.985	0.719935	0.910752	0.751781	0.84353	0.770308	0.664806	0.622601	0.501064	0.815284	0.363943	0.583933	0.758746	0.790226	0.826694	1.29624	1.13925	0.936489
PF10_0183	1.127	1.41803	1.3163	1.27007	1.24699	1.3571	0.93	1.62701	0.765251	1.57694	1.099	1.21969	1.47087	0.84	0.96808	1.03379	1.17276	0.96	1.03961	0.809	0.788664	1.01859	0.890432	0.991628	1.15985	0.905	0.984358	0.886601	1.001	0.816227	0.676264	0.644031	0.88008	1.01702	1.19606	1.04103	0.905317	1.0735	0.85754	0.981476	1.0234	1.2367	0.985144	1.39939	1.46529	1.2604
PF10_0184	0.726	0.929858	0.864401	0.608471	0.584527	0.565671	0.523	0.493786	0.239466	0.393078	0.438	0.26717	0.384449	0.574	0.468888	0.129661	0.272914	0.49	0.2049	0.391	0.166279	0.170232	0.199377	0.286293	0.51148	0.793	1.00849	1.28553	1.588	1.39699	1.51292	1.38018	2.23915	2.90347	3.21797	2.63781	2.05135	1.8051	1.32953	1.31776	1.2492	1.28148	1.14245	1.08077	1.42123	1.05696
PF10_0186	0.702	0.797353	0.782237	0.703347	0.572349	0.437571	0.281	0.484312	0.352692	0.596554	0.751	0.332994	0.412926	0.3239	0.626306	0.394825	0.576517	0.72	0.453186	0.477	0.74036	0.64632	0.980648	1.26752	1.25493	1.421	1.57514	1.66025	2.095	1.78291	1.20433	1.13836	1.81883	1.76578	2.01406	1.44572	1.06885	1.19543	0.609604	0.684296	0.974836	0.978563	1.24923	1.37303	1.18079	1.01945
PF10_0187	0.884	1.15186	1.11173	1.13219	1.31397	2.11175	1.456	2.19066	2.63283	2.89028	2.535	2.92725	3.30768	2.212	1.65668	2.39465	1.94438	1.793	2.09074	1.927	1.65443	1.707	0.891334	1.57941	1.38034	1.169	0.822101	0.770061	0.594	0.743256	0.943581	0.625113	0.627117	0.440638	0.526346	0.412931	0.336223	0.369388	0.259309	0.419702	0.490453	0.644034	0.662503	0.192545	0.47584	0.45347
PF10_0188	0.74725	0.597434	0.524635	0.462678	0.305354	0.253981	0.2445	0.248077	0.253782	0.186134	0.13375	0.110675	0.12103	0.13525	0.169204	0.151856	0.197561	0.3465	0.358396	0.45175	0.486296	0.516074	0.859758	0.963439	1.0328	1.3935	1.39416	1.67392	1.562	2.37947	1.9432	2.16219	2.2442	2.56922	2.22862	2.19169	1.78512	1.69871	1.03525	1.07402	0.768154	0.649302	0.834731	0.602848	0.616201	0.663725
PF10_0189	0.9125	0.844427	0.620004	0.638199	0.578438	0.510499	0.384	0.487865	0.342281	0.308297	0.251	0.194247	0.237789	0.259	0.24665	0.105715	0.16879	0.3095	0.120082	0.1775	0.168601	0.289955	0.43033	0.569386	0.672547	0.852	1.04968	1.43165	1.393	1.82128	1.85105	2.28248	2.74652	3.34788	3.72026	2.96102	2.44776	2.34125	1.57633	1.82153	1.16665	1.16492	1.26358	1.19595	1.14806	1.00525
PF10_0190	0.512	0.592784	0.425074	0.376974	0.569914	0.440107	0.323	0.612199	0.303237	0.653589	0.375	0.507235	0.807342	0.529	0.412486	0.47893	0.54802	0.612	0.265661	0.447	0.409659	1.09248	0.683837	1.12438	1.37214	1.047	1.83475	1.93725	1.782	1.23374	1.4679	1.09971	2.49404	2.63305	1.96987	1.90717	0.930174	1.20739	0.787026	0.938463	0.630062	0.961441	0.496016	0.639523	0.5199	0.462562
PF10_0191	0.794	0.592784	0.595271	0.332698	0.401862	0.442644	0.257	0.306692	0.247275	0.243554	0.358	0.304599	0.49124	0.456	0.53034	0.669333	0.959035	0.778	1.00014	1.268	1.40269	1.70325	1.61667	1.71856	2.0328	1.421	1.6026	1.44779	1.736	1.18334	1.49135	1.31274	1.64089	1.45012	1.49753	1.04744	0.989045	0.97069	0.837068	1.03883	0.878931	0.999636	0.881807	0.851552	1.08512	0.788742
PF10_0193	2.156	1.50288	0.835895	0.969	0.731876	0.819335	0.558	0.504443	0.659834	0.382288	0.342	0.348482	0.387296	0.354	0.391441	0.352773	0.409919	0.446	0.555174	0.615	0.709705	0.490118	0.621588	0.494215	0.470496	0.494	0.516725	0.565668	0.685	0.974206	1.66674	1.63845	1.88231	2.58026	2.33124	1.90351	4.0857	3.32449	3.29709	4.33909	2.36243	2.37726	1.60402	1.62173	1.9449	1.28085
PF10_0194	1.2	1.35875	1.16958	1.77608	1.94842	1.65262	1.65	2.24157	1.93135	2.64673	1.969	2.24061	2.81644	1.732	1.81747	1.78255	1.84683	1.684	1.25922	1.417	0.939151	1.21594	1.02666	0.782107	0.680334	0.656	0.511733	0.354999	0.4	0.31295	0.2842	0.334764	0.346261	0.447102	0.50376	0.350671	0.378087	0.702913	0.499284	0.569595	0.914137	0.94432	0.964476	1.25383	1.17827	1.16607
PF10_0195	0.42	0.335911	0.796489	0.270713	0.367765	0.360203	0.397	0.369451	0.210834	0.641257	0.686	0.819579	1.37974	0.964	1.0228	1.23237	1.98602	1.462	1.05442	1.167	0.86205	1.58727	0.855248	1.90169	1.8451	0.783	1.38459	0.791576	0.715	0.735733	0.383623	0.341345	0.501117	0.680888	0.79541	0.408353	0.359772	0.668246	0.519756	0.779446	0.39212	0.60584	0.773877	0.936363	0.950422	0.689865
PF10_0197	1.018	1.26228	1.63658	1.87854	2.01053	1.90755	2.032	1.97159	2.70311	2.57582	2.479	2.06508	2.38928	1.87	1.93616	1.58047	2.00904	1.741	1.61453	1.67	1.20204	1.48719	1.17822	1.08119	0.989353	1.143	0.764687	0.555806	0.593	0.501773	0.418327	0.491043	0.385696	0.331825	0.34566	0.357996	0.313983	0.349066	0.355981	0.437949	0.698046	0.530768	0.801434	0.866451	0.968046	0.998998
PF10_0198	0.4235	0.632303	0.916382	0.724852	0.937069	1.00388	0.9465	1.11072	0.705384	1.41354	1.422	1.17322	1.28221	1.1775	1.18148	1.22127	1.46705	1.3065	1.43646	1.6875	1.53692	1.61814	1.99152	1.78293	1.76436	1.7395	1.66084	1.53071	1.437	0.959161	0.628428	0.570827	0.716087	0.71267	0.663333	0.572244	0.452658	0.610865	0.397494	0.486176	0.476492	0.513647	0.633225	1.04753	0.847197	0.817723
PF10_0200	1.4515	1.57843	1.62148	2.012	1.79742	2.13332	1.5225	2.16816	1.76541	2.2945	1.7255	2.21673	2.70324	1.5745	1.73244	1.70429	1.86875	1.796	1.41384	1.5335	1.37529	1.15234	1.16514	0.98723	0.920909	0.7565	0.663173	0.552669	0.4695	0.357334	0.248089	0.260327	0.237093	0.239711	0.260227	0.266437	0.274081	0.414815	0.402612	0.526582	0.866791	0.955515	1.07068	1.45555	1.45333	1.40303
PF10_0203	0.807	0.636952	0.739478	0.94623	0.663681	0.629087	0.659	0.785083	1.16089	1.03896	0.775	0.988657	0.954002	0.722	0.735741	0.698536	0.721194	0.714	0.735297	0.774	1.03297	0.749207	1.17461	0.917256	1.06312	1.018	1.36878	1.37607	1.541	1.34057	1.85058	1.8153	1.74381	1.83904	1.69688	1.39536	1.50842	1.1763	0.88711	0.930643	0.68105	0.752032	0.660207	0.830922	0.922728	0.912622
PF10_0205	1.105	1.22509	1.59046	1.92029	1.01805	1.23661	1.333	1.62108	1.66325	1.81433	1.385	1.17064	1.34272	0.926	0.95882	0.935665	0.828606	0.891	0.608635	0.753	0.671619	0.600488	0.796607	0.842084	0.800826	1.154	1.14661	1.31152	1.276	1.41655	0.892931	0.810179	0.909897	1.0655	0.923069	0.81396	0.678987	0.719649	0.533404	0.727309	0.825515	0.790226	1.17919	1.3822	1.30416	1.38541
PF10_0206	0.976	1.05306	1.61981	1.31814	1.42722	1.72999	1.328	1.82594	1.41988	1.95923	1.863	1.61593	1.79979	1.483	1.53546	1.27208	1.53226	1.202	1.15476	1.238	1.02647	1.08312	1.42541	1.0756	1.13771	1.135	1.1541	0.892876	1.008	0.662761	0.689395	0.488575	0.657896	0.636716	0.65695	0.576822	0.39902	0.445896	0.384414	0.475749	0.642202	0.84159	0.655614	1.15068	1.17953	0.962629
PF10_0207	0.562	0.543967	0.518137	0.552811	0.433524	0.342447	0.372	0.402607	0.352692	0.391537	0.319	0.221996	0.353123	0.266	0.312311	0.224279	0.370462	0.311	0.381631	0.395	0.551786	0.625742	0.895845	1.18915	1.5246	1.466	1.3796	1.92112	1.616	1.84986	1.85527	1.50356	1.65532	1.65697	1.46807	0.993415	0.770566	0.817675	0.599368	0.580022	0.501379	0.611108	0.599353	0.53179	0.424228	0.520524
PF10_0208	1.025	1.05965	1.3613	1.88487	1.65941	1.33512	1.29867	1.22637	1.8923	1.58978	1.43967	1.20377	1.26536	1.14033	1.13392	0.899843	0.800475	0.979333	0.785743	0.794333	0.750888	0.685604	0.738268	0.846616	0.809296	1.07033	1.03234	1.23024	1.15467	1.68662	1.33783	1.38923	1.193	1.22244	1.19377	0.824641	0.717799	0.694147	0.542881	0.588277	0.654342	0.616815	0.969069	0.801887	0.832511	0.866783
PF10_0209	0.985	1.26809	1.46722	1.49904	1.56239	2.00522	1.361	1.93014	1.6164	2.50954	2.03	1.98506	2.33232	1.503	1.66678	1.64121	1.84683	1.503	1.45908	1.479	1.32373	1.34595	1.40827	1.18436	1.1705	0.983	1.05675	0.807712	0.958	0.57324	0.565586	0.449094	0.527086	0.463262	0.543039	0.312216	0.425185	0.380147	0.296841	0.45359	0.575433	0.688813	0.766988	1.13464	1.21226	0.973994
PF10_0210	1.129	1.13908	1.58711	1.39278	1.25186	1.27593	1.239	1.57964	1.60078	1.83745	1.49	1.39264	1.67876	1.313	1.43276	1.27208	1.41608	1.349	1.22467	1.325	1.52717	1.19724	1.34963	1.23554	1.20001	1.096	1.1308	1.11161	0.984	0.791402	0.809453	0.546974	0.600186	0.555915	0.525364	0.381801	0.422568	0.468609	0.461752	0.526582	0.921421	0.889004	0.905919	1.01315	0.95294	1.04332
PF10_0211	1.435	1.53659	0.73277	0.931682	0.734921	0.798408	0.6095	0.797517	0.579795	1.022	0.9215	1.07642	1.54349	0.9935	1.13265	1.25865	1.39142	1.185	0.899793	0.793	0.699951	0.806731	0.51784	0.549794	0.524185	0.43	0.4668	0.516362	0.5745	0.666899	0.661257	0.954942	1.47882	1.95163	2.0499	1.72131	2.40785	3.18582	3.04461	3.60917	2.14513	2.14283	1.54488	1.48248	1.48291	1.14845
PF10_0212	1.077	1.07863	1.19306	0.886774	0.882879	0.854848	0.822	1.19361	0.776964	1.33493	0.935	1.08675	1.46802	0.95	1.02953	1.0735	1.23853	0.994	0.820835	0.82	0.755223	0.734242	0.552122	0.788504	0.809023	0.587	0.706441	0.535188	0.606	0.730467	0.588097	0.542039	1.00704	1.38009	1.61537	0.88446	1.07801	1.51222	1.95278	2.95616	1.475	1.63182	1.25497	1.17475	1.25003	1.1547
PF10_0213	0.499	0.447494	0.758761	0.354204	0.482235	0.526353	0.457	0.408528	0.243371	0.521022	0.307	0.455608	0.783136	0.513	0.510978	0.57822	0.959035	0.67	0.770664	0.876	1.08406	1.59382	1.35775	1.75854	2.25084	1.261	1.84806	1.66652	1.245	0.951638	0.753176	0.686802	1.17729	1.16785	1.13714	0.949467	0.592642	0.786594	0.540227	0.606091	0.63856	0.705935	0.592464	0.649838	0.67096	0.771694
PF10_0214	0.5725	0.648576	0.85937	0.97659	0.925501	1.13388	1.06	1.61635	1.02619	2.07946	1.5835	1.65206	2.1045	1.5075	1.61964	1.65581	1.76243	1.828	2.0673	1.7945	1.95587	1.74815	1.89499	1.8593	1.75821	1.3615	1.33175	1.052	0.999	0.743256	0.52244	0.432644	0.440521	0.391618	0.434039	0.359827	0.236795	0.333525	0.218366	0.337586	0.383015	0.4366	0.531036	0.687659	0.587877	0.715437
PF10_0215	1.327	1.49765	1.41356	1.61858	1.69208	1.74838	1.4345	1.4334	1.85977	1.78504	1.706	1.39586	1.28363	1.0775	1.27787	0.98239	1.01822	1.1285	1.26662	1.295	1.13934	1.04945	1.40286	1.12878	1.06271	1.2785	1.16159	1.01031	1.032	1.11752	0.955774	0.82334	0.681942	0.599548	0.63731	0.453675	0.472936	0.515828	0.391238	0.52593	0.762388	0.725691	0.802582	0.722615	0.914545	0.764307
PF10_0217	0.644	0.858956	0.974232	1.1208	1.17514	1.4091	1.178	1.73595	1.32227	2.6791	1.586	1.92569	2.7068	1.541	1.21557	1.51622	1.80737	1.452	1.4048	1.221	1.18439	1.24213	1.36407	1.27152	1.29673	1.026	1.34132	1.00942	0.941	0.836539	0.721286	0.59139	0.608842	0.591467	0.550895	0.45047	0.315291	0.351457	0.332098	0.377992	0.462531	0.590035	0.634947	0.650984	0.745232	0.813746
PF10_0218	1.697	1.3634	1.13688	1.28019	1.04849	1.24676	0.78	0.999412	0.911013	1.12682	0.706	0.924123	1.17186	0.66	0.696176	1.03963	0.904233	0.565	0.604523	0.683	1.05898	0.967142	0.966213	0.838885	1.02132	1.1	1.00766	1.19678	1.339	0.942611	0.92107	0.968103	0.986844	1.08813	0.98788	0.872557	1.21276	1.08306	1.04861	1.89257	2.25196	1.95186	1.78313	1.63434	2.09219	1.38314
PF10_0219	1.852	2.14971	2.08261	2.36431	1.95816	2.35654	1.8555	2.78154	2.37905	2.98277	2.3445	2.17608	2.62991	1.604	1.79516	1.7294	1.68407	1.4115	1.29335	1.244	0.996745	0.879687	0.921556	0.728527	0.700416	0.6405	0.574555	0.4182	0.3595	0.283611	0.287952	0.237296	0.290474	0.297888	0.362845	0.312674	0.400982	0.479966	0.571504	0.822459	1.19214	1.35326	1.26013	1.39595	1.41682	1.56782
PF10_0220	1.888	1.87366	0.674082	1.35736	0.742836	0.618941	0.578	0.61812	0.779567	0.437781	0.411	0.308471	0.303287	0.284	0.320729	0.135502	0.137005	0.357	0.182899	0.2	0.106827	0.107564	0.120889	0.141547	0.177051	0.247	0.236312	0.497536	0.513	1.01257	1.69769	2.32279	2.61523	2.80328	2.67592	2.28898	4.19559	3.20734	1.96302	2.30054	1.8392	1.87679	1.90484	1.50024	1.84294	1.41496
PF10_0221	0.453	0.446332	0.363032	0.332698	0.294699	0.243518	0.16	0.245117	0.153571	0.169563	0.209	0.104545	0.183681	0.308	0.242441	0.203253	0.347445	0.431	0.651404	0.709	0.916857	1.19349	1.76733	1.65698	1.58854	1.86	1.9138	2.09951	2.256	1.63245	1.58889	1.22884	1.48315	1.22926	1.21767	0.927493	0.592642	0.798548	0.512932	0.623035	0.60214	0.534719	0.474201	0.569611	0.511088	0.402327
PF10_0223	3.401	2.57454	1.50243	2.33395	1.28352	1.05271	0.902	0.767321	1.03725	0.480943	0.525	0.450446	0.401535	0.373	0.506769	0.24881	0.314563	0.509	0.390678	0.366	0.354852	0.267507	0.333799	0.349469	0.359839	0.433	0.372775	0.428509	0.553	0.674798	1.07865	1.39088	1.39755	1.49106	1.23534	1.11153	2.20442	1.94138	2.12679	4.07449	3.44167	3.22149	2.63509	2.11684	3.1836	1.66045
PF10_0225	0.622	0.706692	1.08993	1.22706	1.25917	1.39642	1.33	1.6424	2.21116	2.27215	2.142	1.96957	2.16858	1.659	1.91343	1.50454	1.50486	1.539	1.51665	1.662	1.60613	1.20472	1.56525	1.24549	1.0787	1.166	1.04094	0.921563	0.913	0.756797	0.622801	0.48693	0.396276	0.32967	0.313254	0.355249	0.307441	0.396883	0.258172	0.331069	0.591215	0.463599	0.65217	0.885935	0.92021	0.736462
PF10_0226	0.865	0.72064	0.546643	0.409864	0.322707	0.29425	0.211	0.299587	0.219945	0.246637	0.388	0.19102	0.434285	0.467	0.680182	0.527991	0.727771	1.541	1.55778	1.684	1.52252	1.57324	2.3393	1.8561	1.99182	2.111	1.76818	1.84223	1.938	1.35712	1.56357	1.11287	1.20999	1.04934	0.96333	0.741628	0.715619	0.665855	0.627801	0.576112	0.802449	0.568963	0.484534	0.566173	0.586618	0.721688
PF10_0228	0.574	0.557915	0.521826	0.521185	0.521203	0.405863	0.219	0.54944	0.623393	0.576515	0.334	0.518851	0.505479	0.346	0.514345	0.357445	0.465817	0.793	0.69993	0.837	0.659542	0.758561	1.46691	1.42826	1.891	1.573	1.69163	2.22771	2.423	1.41504	1.80087	1.46079	1.61877	1.68929	1.46414	1.03645	0.770566	0.90255	0.592544	0.570898	0.526873	0.620327	0.496016	0.652818	0.484652	0.688729
PF10_0229	1.304	0.813625	1.13605	0.874124	1.16053	0.994364	0.977	1.01362	1.47194	0.994257	0.83	1.48944	1.0494	0.862	1.07583	1.07	0.848335	1.066	0.791226	0.671	0.962375	0.864254	0.470025	0.730126	0.690989	0.703	0.688135	0.718066	0.76	0.941106	1.4013	1.19183	1.21384	1.62357	1.3414	1.41825	2.20965	1.70468	1.78446	1.92515	1.38031	1.29465	1.05748	0.830922	1.02973	1.20812
PF10_0231	2.445	1.60749	1.41607	1.02213	1.03388	0.821872	0.504	0.704562	0.428176	0.413118	0.691	0.407853	0.508327	0.507778	0.534549	0.217271	0.21592	0.639	0.294448	0.476	0.425637	0.4846	0.587306	0.565388	0.685252	0.79	0.916127	0.763786	0.995	0.618377	0.790694	0.943427	1.34561	1.59664	1.33354	1.28915	1.92053	1.73577	1.72645	3.26246	2.67443	3.60343	2.06214	2.75981	3.10429	1.49111
PF10_0232	1.20367	1.25763	1.09943	1.07653	0.886126	0.798619	0.721	0.861263	0.6299	0.950582	0.776667	0.733964	1.15999	0.688	0.9027	0.78965	1.12161	1.01133	0.861411	0.957667	0.711872	0.973377	1.06756	0.999358	1.07979	1.02467	1.12498	1.07725	1.09267	1.16529	0.664071	0.821969	0.970172	1.21597	1.23239	1.22079	1.09501	1.41101	1.1722	1.5476	1.56403	1.37148	1.58067	1.44791	1.49844	1.37746
PF10_0233	0.737	0.696231	0.467833	0.47691	0.440831	0.410936	0.299	0.458261	0.383927	0.513314	0.414	0.596292	0.81019	0.612	0.727323	0.885436	1.17167	1.29	1.32337	1.387	1.84672	1.69764	1.81695	1.64978	1.69428	1.677	1.92295	1.50606	1.361	1.19237	1.17901	0.861998	0.894507	0.885585	0.723725	0.639082	0.723468	0.624015	0.796125	1.16526	1.22735	1.13661	0.963328	1.06014	1.11407	0.905803
PF10_0234	0.613	0.493987	0.544128	0.326373	0.360458	0.3323	0.475	0.350505	0.262892	0.308297	0.46	0.330413	0.635052	0.668	0.930199	0.515141	0.881216	1.476	1.53475	1.54	1.61356	1.83607	2.21119	1.93607	1.54182	1.992	1.9113	1.81354	1.722	1.20967	0.8798	0.834855	0.801209	0.683042	0.763987	0.928408	0.59395	0.627601	0.701727	0.686903	0.842511	0.626912	0.84162	0.9696	0.853491	0.55121
PF10_0236	0.401	0.421923	0.27416	0.260593	0.232593	0.216883	0.122	0.168148	0.167887	0.151065	0.11	0.136812	0.232093	0.245	0.491616	0.335251	0.550212	0.775	0.868539	1.38	1.35253	1.66491	2.02535	1.8705	1.89838	2.374	2.01781	1.99194	2.188	1.65878	1.54199	1.01087	1.20037	1.01487	0.835672	0.710498	0.575635	0.558266	0.434457	0.530492	0.467387	0.393796	0.382346	0.453855	0.511088	0.381869
PF10_0237	1.036	0.927533	1.1788	0.636302	0.742836	0.763529	0.789	0.792188	0.622092	0.628925	0.744	0.543374	0.741844	0.469	1.07078	0.408842	0.699274	0.903	0.587251	0.574	0.532279	0.870802	1.02125	1.18516	1.3746	1.426	1.15993	1.67997	1.826	1.32026	1.62735	1.52906	1.70726	1.24973	1.38951	1.08772	0.583484	0.904941	0.812047	0.800301	0.950557	1.16558	1.0414	1.58047	1.70698	1.48997
PF10_0238	0.487	0.448656	0.537421	0.313723	0.286175	0.350057	0.341	0.208408	0.20693	0.189603	0.256	0.118742	0.220702	0.33	0.470571	0.234792	0.295931	0.643	0.71638	0.775	0.678121	1.12989	1.66268	1.52663	1.64755	1.903	1.92545	1.75796	1.851	2.06351	2.11696	1.34893	1.53798	1.337	1.20097	0.741628	0.618807	0.60967	0.446967	0.625642	0.751462	0.550524	0.662503	0.418326	0.410381	0.35232
PF10_0239	0.454	0.454468	0.353809	0.245413	0.179011	0.248591	0.255	0.290114	0.187408	0.272843	0.154	0.352354	0.425741	0.284	0.63304	0.587565	0.781477	1.366	1.33571	1.434	1.55132	1.93802	2.52605	1.94007	2.04346	2.128	1.73656	1.74541	1.843	1.00505	1.20527	0.968925	1.13881	0.761689	0.801302	0.680283	0.431726	0.77703	0.792713	0.871989	1.12537	0.86398	1.21708	2.00223	2.01792	1.07969
PF10_0241	0.369	0.481201	0.663182	0.330168	0.293481	0.441376	0.281	0.256958	0.152848	0.172646	0.427	0.099382	0.226398	0.494	0.551385	0.452063	0.541444	0.847	0.967236	1.125	1.48165	1.73973	1.38662	2.43749	2.4492	1.966	2.37311	2.03855	1.938	1.2202	1.51198	0.918751	1.13593	0.978237	0.942708	0.587809	0.498447	0.494908	0.53909	0.602181	0.582717	0.543939	0.516684	0.720896	0.506053	0.363685
PF10_0242	1.958	2.04801	1.99877	2.2707	2.18223	2.0217	1.967	2.33394	2.35171	2.95194	2.017	2.45486	2.84492	1.556	1.83767	1.29311	1.15632	1.253	0.954077	0.737	0.737573	0.68841	0.82277	0.66535	0.609841	0.682	0.639874	0.596147	0.597	0.461149	0.382685	0.378358	0.36165	0.398621	0.425201	0.390957	0.389862	0.63836	0.804086	0.938463	1.30868	1.32099	1.72458	2.42285	2.35151	2.12983
PF10_0243	0.506	0.563726	0.484601	0.4592	0.428653	0.34752	0.345	0.518652	0.39564	0.490192	0.708	0.498201	0.610846	0.597	1.04721	0.668165	0.99082	1.299	1.52159	1.553	1.29307	1.78743	2.4205	1.8673	1.94182	2.006	1.81644	1.6217	1.722	1.22321	0.874172	0.845547	0.84353	0.658263	0.778716	0.6519	0.535079	0.459046	0.406024	0.501817	0.587573	0.534719	0.51898	0.677345	0.597948	0.45006
PF10_0244	2.03533	2.30527	2.10972	2.30865	1.92447	1.57779	1.69667	1.78173	1.62941	1.92994	1.46067	1.29928	1.46043	0.976667	0.899333	0.730465	0.719368	0.841333	0.618505	0.517333	0.442172	0.461434	0.424015	0.392919	0.404648	0.421667	0.414656	0.511581	0.580667	0.744008	0.8032	1.01773	1.14619	1.44653	1.68313	1.59221	1.70205	2.1717	1.49292	1.90213	1.62068	1.62743	1.94464	1.63663	2.20171	1.9317
PF10_0245	1.253	1.34829	1.37164	1.57115	1.02658	1.16051	1.006	1.18532	1.13877	1.17307	1.112	0.836357	0.878536	0.735	0.738266	0.510469	0.672969	0.508	0.540369	0.635	0.631674	0.597682	0.766836	0.750918	0.873778	1.154	1.09419	1.35097	1.457	1.22472	1.37129	1.16222	1.20518	1.26266	1.25105	0.90735	1.02437	1.05915	0.667607	0.875899	0.984548	0.941686	1.05748	1.1461	1.3608	1.04446
PF10_0246	0.54	0.503285	0.463641	0.490825	0.409169	0.205468	0.281	0.316165	0.291524	0.482484	0.455	0.494329	0.666378	0.575	0.727323	0.946178	0.952459	0.876	1.30445	1.073	1.72224	1.63685	2.14443	1.67857	1.51313	1.37	1.66833	1.62529	1.849	1.40451	1.52605	1.33741	1.33888	1.0849	1.22454	1.16921	1.05053	0.861906	0.794987	0.516155	0.548725	0.687496	0.45583	0.688806	0.460734	1.03309
PF10_0249	0.459	0.52072	0.424235	0.421249	0.502937	0.487035	0.349	0.465366	0.331869	0.46707	0.435	0.281367	0.458491	0.399	0.298842	0.244137	0.415399	0.456	0.508293	0.68	0.610309	0.838065	1.3767	1.73535	1.9369	1.509	1.92794	2.04483	2.03	1.44739	1.30563	0.992778	1.47642	1.09244	1.17348	1.05842	0.732626	0.712477	0.574347	0.533099	0.660412	0.62823	0.667096	0.617747	0.645783	0.530753
PF10_0251	1.131	1.44012	1.36074	1.40416	2.09943	1.3774	1.167	1.82594	0.744428	1.80199	1.199	1.24937	1.6631	1.017	0.7913	1.01627	1.23414	0.973	1.061	1.039	1.02183	1.22623	0.933736	1.24673	1.1664	1.121	1.16242	1.23532	1.267	0.706394	0.720348	0.676932	0.736766	0.921138	0.954492	0.642744	0.697303	0.797352	0.502696	0.789873	0.769672	1.1827	0.84851	1.2206	1.34192	0.722824
PF10_0252	0.69	1.01122	0.793974	1.02846	0.997349	0.919533	0.596	0.962704	0.560924	0.846275	0.719	0.721487	0.951154	0.59	0.872114	0.790818	0.854911	1.007	1.08896	1.161	0.974451	1.32164	1.64283	1.74734	1.65985	1.738	1.62922	1.95787	1.37	1.07276	1.30188	0.767408	0.813713	0.95669	0.861203	0.723316	0.667213	0.743558	0.685805	0.801604	0.770886	0.875834	0.744024	0.906564	0.805656	0.967175
PF10_0253	0.496	0.462604	0.327818	0.385829	0.235028	0.258737	0.125	0.198935	0.11713	0.146441	0.22	0.099382	0.189377	0.265	0.436899	0.380807	0.60063	0.895	1.08485	1.553	1.70552	1.5536	2.10113	2.17758	2.10739	2.884	2.09602	1.99821	1.976	1.38721	1.35253	1.05282	1.07629	0.764921	0.729617	0.536536	0.59395	0.669441	0.426495	0.604787	0.590001	0.36087	0.524721	0.591387	0.455699	0.276173
PF10_0257	0.624	0.761321	1.00525	0.888039	1.16175	1.44462	1.225	2.00948	1.75565	2.93961	2.505	2.46003	3.47428	2.68	2.2973	2.49978	2.48691	2.483	2.10226	1.748	1.5764	1.58166	0.841715	1.31471	1.04591	0.944	1.04177	0.857018	0.515	0.774851	0.64156	0.602082	0.562674	0.528981	0.545003	0.455048	0.374163	0.338307	0.287742	0.345407	0.495309	0.518915	0.656762	0.262457	0.592912	0.57735
PF10_0258	0.893	0.962984	1.38925	1.01517	1.13435	1.11105	1.115	1.63056	1.66715	2.00008	2.2955	1.21904	1.65242	1.256	1.44539	1.14943	1.47801	1.8095	1.82508	2.1645	1.04644	1.43201	1.5242	1.3367	1.36927	1.507	1.05259	1.10086	1.091	0.788016	0.945926	0.886673	0.779568	0.878582	0.87446	0.653731	0.58283	0.709488	0.454928	0.474445	1.09927	0.880443	0.923142	1.21601	1.44452	0.882505
PF10_0259	0.581	0.36032	0.736962	0.369384	0.410386	0.554538	0.407	0.521021	0.300634	0.729122	2.052	0.460771	1.1149	0.897	1.50095	1.45197	1.73613	1.82	2.1771	2.565	2.95215	3.2316	3.61766	2.36151	1.95411	2.745	1.74156	1.23712	1.348	0.731971	0.706279	0.556844	0.470338	0.396466	0.46448	0.333275	0.316599	0.321571	0.180834	0.397543	0.293786	0.462282	0.46846	0.974184	0.605501	0.852387
PF10_0262	3.119	2.63266	1.5192	1.56609	1.00344	0.88402	0.763	0.856132	0.642915	0.611969	0.463	0.484003	0.51687	0.231	0.193616	0.144847	0.138101	0.218	0.0945852	0.11	0.0882486	0.126271	0.090216	0.10636	0.108198	0.11	0.0956899	0.0779922	0.145	0.352821	0.425831	0.786326	1.134	1.57401	1.64778	1.71215	2.14947	3.51337	4.0682	6.35939	4.23077	4.60175	4.38148	2.87212	3.17353	2.2003
PF10_0264	0.952	0.968214	1.09413	1.33965	1.46132	1.44715	1.394	2.06632	2.40638	2.67293	2.092	2.49617	3.07274	1.856	2.20217	2.03954	1.95424	1.643	1.4525	1.641	1.81885	1.15608	1.35685	1.00202	1.04755	0.836	0.861209	0.736892	0.715	0.561955	0.551516	0.378358	0.348185	0.283344	0.288704	0.249956	0.223713	0.242672	0.261584	0.357137	0.411544	0.464916	0.623465	1.01659	1.02469	1.02173
PF10_0265	0.737	0.771782	1.19473	0.742563	0.885314	1.23661	0.966	1.39847	1.52009	1.52144	1.642	1.76177	1.83681	1.721	1.23409	1.5828	1.50377	1.538	1.81275	1.862	1.36553	1.62749	1.27475	1.597	1.64346	1.454	0.984358	1.07396	1.059	0.70188	0.727852	0.537926	0.589605	0.485887	0.574463	0.584146	0.727393	0.426769	0.441281	0.538313	0.72961	0.669058	0.568352	0.616601	0.606759	0.570531
PF10_0266	1.512	1.97246	2.04069	1.95445	2.42091	2.21068	1.401	1.55596	1.21815	1.765	1.571	1.97473	2.52739	1.365	1.79642	1.52557	1.632	1.501	1.19506	1.344	0.904781	1.19817	1.1683	0.909259	0.806564	0.718	0.721419	0.606905	0.59	0.438581	0.306711	0.495155	0.323177	0.318897	0.435021	0.499912	0.395095	0.437528	0.477675	0.514851	0.989404	1.21563	1.23545	1.48878	1.51438	1.26835
PF10_0267	0.863	1.2495	1.31379	1.54585	1.20559	1.20364	1.212	1.23387	1.4368	1.6201	2.017	1.3152	1.45948	1.415	1.55566	1.16812	1.13879	1.765	1.65318	1.873	1.34324	1.37308	1.76102	1.18276	1.13853	1.371	1.12914	0.902737	0.849	0.670284	0.589972	0.507493	0.436674	0.456798	0.45466	0.398282	0.659364	0.435137	0.33096	0.388419	0.671338	0.74808	0.786507	0.939801	1.11911	1.10583
PF10_0268	1.297	1.62376	1.53932	0.92599	1.39069	1.25183	0.729	1.17348	0.391736	1.00813	0.477	0.518851	0.670649	0.292	0.120379	0.193908	0.176462	0.15	0.127484	0.153	0.109614	0.279667	0.223736	0.397451	0.678694	0.478	0.891164	1.38414	1.178	1.09156	1.76804	1.96828	3.04325	2.98104	3.51846	2.94362	1.7583	2.28447	1.27721	1.45201	1.47743	1.79118	1.25152	0.884788	1.38346	0.966039
PF10_0269	1.113	1.07631	1.30205	1.66855	1.31519	1.5093	1.56	1.56188	2.82804	2.14575	2.041	1.98635	2.06036	1.674	1.76275	1.59799	1.46541	1.753	1.51583	1.591	1.56804	1.19443	1.171	1.0772	1.03362	1.072	0.964388	0.864189	0.667	0.725953	0.763494	0.546151	0.491498	0.410472	0.446805	0.35708	0.344073	0.383733	0.269545	0.462714	0.513519	0.57028	0.77847	0.680783	1.01714	0.963766
PF10_0270	0.708	0.728776	0.774691	0.742563	0.767191	0.937289	1.086	1.37952	1.42508	1.61085	1.405	1.74112	1.50362	1.231	2.07253	1.38072	1.28456	1.704	1.6318	1.957	1.68137	1.67519	1.41368	1.6066	1.3328	1.238	0.859545	0.96549	0.666	0.479957	0.780377	0.692559	0.662705	0.566688	0.672662	0.482516	0.332298	0.51284	0.52658	0.271112	0.588787	0.698033	0.871473	1.06473	1.09519	1.22857
PF10_0272	0.918	0.97635	1.10754	1.33965	1.23359	1.24803	1.472	1.78686	2.14478	2.36155	2.063	2.2703	2.24119	1.846	2.28551	1.78956	1.69996	1.846	1.53968	1.504	1.3293	1.31322	1.17551	1.01962	0.908204	1.166	0.956899	0.762889	0.825	0.735733	0.816019	0.547796	0.525162	0.44387	0.482156	0.401944	0.363697	0.338307	0.340059	0.349317	0.471029	0.524183	0.590168	0.501991	0.696137	0.72737
PF10_0273	1.278	2.10729	1.81935	2.19353	2.40265	2.01409	1.422	1.92422	1.57605	2.28448	1.283	1.55655	1.69727	1.19	1.63479	1.13425	1.49061	1.487	2.05044	1.01	0.819319	0.948435	1.28558	0.766113	0.723777	1.076	0.778832	1.22098	0.964	0.583772	0.735355	0.570827	0.573254	0.680888	0.64222	0.390957	0.446117	0.63836	0.642586	0.613911	0.948129	1.15505	1.11374	0.966161	1.15813	1.08992
PF10_0274	0.462	0.653225	0.872785	0.9437	1.17392	1.56891	1.121	1.69924	1.94436	2.60973	2.773	2.41872	3.02433	2.754	2.81417	2.0629	2.22058	2.694	2.03975	2.065	1.69623	1.26084	1.41278	1.0716	0.974598	0.817	0.756366	0.615869	0.539	0.28662	0.282324	0.267318	0.190444	0.21978	0.277903	0.184949	0.107277	0.31918	0.123968	0.165534	0.342346	0.326627	0.567204	1.17246	0.883704	0.975131
PF10_0275	1.044	0.898475	1.40769	1.23465	1.34076	1.23154	1.3	1.57135	1.73092	1.74342	1.684	1.91536	2.00198	1.792	2.07169	1.63303	1.83806	1.715	1.82344	1.746	1.65536	1.5087	1.5887	1.0676	1.07542	1.251	0.812948	0.786197	0.791	0.413003	0.515874	0.430176	0.567483	0.558069	0.716851	0.555763	0.54162	0.644337	0.599368	0.694723	0.696832	0.653253	0.921993	1.10255	1.33563	1.04787
PF10_0276	0.578	0.499217	0.424655	0.5351	0.248424	0.204834	0.182	0.167556	0.229705	0.121006	0.1435	0.116806	0.108927	0.148	0.16752	0.0893613	0.111248	0.2935	0.280054	0.4175	0.549928	0.555124	0.943208	1.03721	1.15288	1.4435	1.50608	1.88123	2.175	2.30988	3.08633	2.60039	2.11267	1.76417	1.47986	1.13716	0.97073	0.916896	0.636331	0.707106	0.611245	0.566328	0.574093	0.679064	0.684178	0.542686
PF10_0278	1.498	1.54008	2.09519	1.84186	1.85953	2.20815	1.677	2.08527	2.1565	2.33997	1.997	1.90633	2.5815	1.668	1.82167	1.60617	1.62214	1.713	1.27813	1.587	1.1816	1.48813	1.20619	1.03641	0.904106	0.972	0.895325	0.57015	0.602	0.48447	0.369553	0.377535	0.383773	0.344753	0.386903	0.342431	0.279968	0.400469	0.433319	0.610001	0.855865	0.816567	1.03452	1.37417	1.26765	1.20357
PF10_0279	2.057	1.82485	1.93254	1.72168	1.45036	1.7414	1.447	1.7466	1.53441	1.98081	1.503	1.39393	1.42104	1.189	1.20631	0.838711	1.02809	1.123	1.17944	0.964	0.962375	1.03916	1.18273	0.85408	0.804105	0.849	0.890332	0.70193	0.716	0.728962	0.666885	0.630048	0.81179	0.782159	0.727653	0.815791	0.758791	0.766271	1.02473	1.32167	1.55148	1.57518	1.42834	1.23435	1.28401	1.16948
PF10_0280	1.402	1.12397	1.12682	0.656542	0.769627	0.650649	0.388	0.471287	0.369611	0.354541	0.48	0.241356	0.192224	0.524	0.356927	0.115644	0.128237	0.286	0.257436	0.366	0.481187	0.648191	0.728043	1.14357	1.10411	1.099	1.29889	1.50157	1.388	1.74831	2.21544	1.86218	2.18529	2.23551	1.99442	1.63982	1.17351	1.31856	1.13391	1.36077	1.55027	1.71611	1.00811	0.670468	0.733902	0.671681
PF10_0281	3.397	2.58965	1.432	1.77734	0.970558	0.897971	0.748	0.860868	0.739222	0.593471	0.452	0.358808	0.348852	0.195	0.134689	0.121485	0.0920674	0.13	0.0847154	0.1	0.0798882	0.130012	0.155172	0.201524	0.231969	0.249	0.253786	0.325416	0.432	0.634927	0.883552	1.25763	1.78036	2.73109	1.81766	1.81653	3.09796	3.67715	4.3912	7.58721	4.31453	4.44107	3.14373	2.16269	2.35025	1.7866
PF10_0282	1.06	0.879878	0.788944	0.643892	0.468839	0.451522	0.33	0.332743	0.326663	0.214266	0.222	0.154881	0.175138	0.175	0.170045	0.162369	0.213728	0.322	0.333927	0.582	0.633532	0.649126	1.03748	1.01322	1.13853	1.503	1.36629	1.52757	1.859	1.6821	2.17042	2.02668	2.13912	2.02973	1.82257	1.50798	1.58692	1.54689	1.00425	1.41421	1.07803	1.20378	1.06207	1.00284	1.05868	0.768285
PF10_0285	1.313	1.66909	1.97613	2.75899	2.69004	3.43208	2.353	3.17231	2.52481	3.03518	2.487	2.37226	2.95598	2.026	1.85619	1.44146	1.78874	1.4	1.68279	1.502	1.21226	1.08406	1.03117	0.889266	0.71476	0.635	0.52255	0.341552	0.347	0.242235	0.167894	0.23524	0.179863	0.147597	0.205235	0.238053	0.235487	0.236695	0.244524	0.430129	0.636132	0.709886	1.05863	1.30197	1.48165	1.4627
PF10_0286	0.375	0.354508	0.467833	0.335228	0.270344	0.319617	0.18	0.189462	0.190011	0.235847	0.237	0.272332	0.570977	0.498	0.90747	0.855065	1.43472	1.635	1.9756	2.395	2.03251	2.12135	2.92751	2.10881	2.08117	2.307	2.31237	1.68445	1.36	1.16152	0.634994	0.518186	0.516506	0.523594	0.568571	0.457795	0.358463	0.462632	0.291154	0.307607	0.366626	0.428039	0.33527	0.410303	0.409122	0.336409
PF10_0287	0.9	0.861281	1.22659	1.13345	1.75358	1.70589	1.159	1.38307	1.42769	1.3041	1.144	1.46879	0.946883	1.113	1.19705	1.07701	1.04781	0.967	1.25017	1.08	1.30887	1.19911	0.782173	1.18835	0.846728	0.807	0.817108	0.673243	0.636	0.736485	1.05989	0.830742	0.968569	1.07735	1.08706	0.827693	0.921016	0.809307	0.471988	0.565685	0.715042	0.873199	0.719913	0.465316	0.608018	0.57735
PF10_0289	0.539	0.5707	0.529037	0.980385	0.641762	0.811725	0.759	0.902313	1.24418	1.00042	0.838	0.845392	1.04655	0.726	0.917572	0.863241	0.964515	1.364	1.22632	1.713	1.98141	1.66865	2.24548	1.8561	1.74428	2.149	1.76652	1.48902	1.333	1.24578	1.12461	0.850483	0.655972	0.526826	0.521436	0.423918	0.447425	0.396883	0.303665	0.410578	0.356914	0.331895	0.461571	0.560442	0.548853	0.529616
PF10_0291	0.623	0.714828	0.568442	0.335228	0.278868	0.260006	0.28	0.22617	0.217342	0.177271	0.395	0.148428	0.334613	0.445	0.727323	0.406506	0.585285	1.069	1.31103	1.496	0.686482	1.40301	1.62569	1.77533	1.50985	2.27	2.02363	1.88526	1.843	1.84911	2.03536	1.54386	1.59569	1.47059	1.68116	1.10145	0.591334	0.742363	0.456066	0.59045	0.598499	0.69935	0.541944	0.351852	0.492205	0.354593
PF10_0292	0.806	0.761321	0.615393	0.47944	0.501719	0.414741	0.295	0.339848	0.221246	0.254345	0.131	0.138102	0.12815	0.115	0.110277	0.0899453	0.081107	0.121	0.0419465	0.078	0.0919644	0.113176	0.299517	0.55979	0.790171	0.946	1.2473	1.50247	1.64	1.97249	2.07194	2.00612	2.66332	2.71601	2.68377	2.48216	1.85904	1.53135	0.986057	1.01015	0.904425	0.948271	1.0437	0.952408	0.923986	0.838749
PF10_0294	0.92	0.940319	1.38757	1.28905	1.48811	1.35076	1.194	1.37478	1.32357	1.63397	1.398	1.43136	1.58621	1.347	1.45633	1.41576	1.41937	1.397	1.35216	1.408	1.32373	1.38524	1.35504	1.28752	1.19673	1.197	1.14994	1.04527	0.928	0.89973	0.770059	0.609485	0.590567	0.601164	0.65695	0.561257	0.576943	0.649119	0.409436	0.552651	0.710186	0.669058	0.761247	0.904272	0.940351	0.866025
PF10_0295	3.111	2.37811	1.11005	1.54838	0.846346	0.82314	0.73	0.573123	0.845941	0.47786	0.4	0.352354	0.271962	0.12	0.212136	0.13083	0.115084	0.299	0.137354	0.113	0.11333	0.0982107	0.0442058	0.0535799	0.0606563	0.075	0.121485	0.229494	0.342	0.810961	1.68456	1.86958	1.71303	2.23874	2.30276	1.87879	4.45594	3.95209	3.50636	3.91026	3.46838	3.00417	3.11273	2.37586	3.17101	2.13892
PF10_0296	2.484	2.65474	2.13124	2.20365	1.21776	1.86063	1.86	2.74957	2.02115	2.60048	1.788	1.07255	1.10636	0.713	0.750894	0.706713	0.561173	0.597	0.611103	0.448	0.446817	0.344205	0.402363	0.390254	0.498365	0.564	0.278749	0.22053	0.263	0.291886	0.610607	0.799487	0.881042	0.873734	0.789518	0.855161	1.03614	1.26238	1.23058	1.8678	2.68899	3.03052	2.78205	3.79932	4.46635	3.355
PF10_0297	1.329	1.43198	1.75731	1.68373	1.48324	1.83653	1.341	2.14684	1.96779	2.28294	1.719	1.82501	1.88665	1.463	1.48832	1.43445	1.39636	1.471	1.29458	1.26	1.30236	1.18414	1.51202	1.0796	0.99673	0.963	0.674822	0.7602	0.83	0.66577	0.671574	0.556844	0.588644	0.490196	0.537147	0.333275	0.520688	0.493713	0.523168	0.772929	0.814589	0.968027	1.12752	1.32947	1.32933	1.07401
PF10_0298	0.712	0.857794	1.03376	0.95129	0.953509	1.06285	0.927	1.21374	1.12575	1.5122	1.148	1.09966	1.62892	1.047	0.965555	1.11672	1.48404	1.001	1.22467	1.253	1.46864	1.21501	1.03478	1.46185	1.62296	1.333	1.2914	1.29987	1.055	0.949381	1.35909	1.00676	1.17055	0.946994	0.924051	0.64366	0.575635	0.586957	0.369629	0.518762	0.623992	0.755983	0.671689	0.50543	0.709984	0.804653
PF10_0299	0.689	0.993785	1.09161	1.61669	1.60258	1.85555	1.358	1.89936	1.33268	2.26598	1.718	1.89084	2.3665	1.365	1.15833	1.66808	1.63968	1.327	1.39164	1.35	1.48536	1.66958	1.5851	1.45066	1.51395	1.227	1.34465	0.954732	1.005	0.621386	0.603104	0.458142	0.480918	0.408317	0.453678	0.32595	0.285201	0.309617	0.295703	0.450984	0.486811	0.612425	0.673985	1.11745	0.970563	0.963766
PF10_0300	1.154	1.17511	1.60304	2.03414	2.00444	2.41996	1.913	2.45117	2.92305	2.79779	2.564	2.54779	2.31666	1.935	1.83178	1.7954	1.48513	1.505	1.59232	1.419	1.56061	1.28516	1.3776	1.08199	0.933614	0.858	0.673158	0.518155	0.536	0.479957	0.541199	0.49022	0.350108	0.349063	0.338786	0.363489	0.480132	0.313203	0.295703	0.368868	0.556009	0.691448	0.831287	1.08192	1.22233	1.1797
PF10_0301	1.242	1.4192	0.885361	1.80138	1.88875	1.9418	0.996	1.96804	2.31267	2.70068	1.843	1.96441	1.90658	1.598	1.69119	1.51038	1.31086	1.636	2.21165	1.972	1.22619	1.10277	1.82417	1.51143	1.18116	1.365	1.04676	0.83371	0.822	0.638688	0.699713	0.530523	0.545361	0.577462	0.604905	0.385463	0.452658	0.661073	0.396925	0.518762	0.925063	1.0589	0.859991	0.916879	0.883704	0.883073
PF10_0304	0.786	0.80084	0.740316	1.09677	0.953509	0.998169	0.828	1.12848	1.44721	1.50295	1.772	1.64561	1.65455	1.453	1.80568	1.50688	1.53336	1.556	1.44839	1.636	1.11658	1.35905	1.39564	1.10279	1.07296	1.173	1.03345	1.01031	1.068	1.00279	1.04957	0.989488	1.02436	0.944839	1.24221	0.885376	1.12118	0.769858	0.711963	0.736433	0.639774	0.736227	0.739432	0.9696	0.852233	0.847841
PF10_0306	1.3165	1.11757	0.783075	0.935477	0.861568	0.707089	0.575	0.815871	0.636408	0.592701	0.326	0.444638	0.511886	0.219	0.234023	0.296119	0.366625	0.206	0.180946	0.168	0.137482	0.203436	0.143895	0.197926	0.237297	0.242	0.400649	0.672795	0.8665	1.09608	1.90123	1.95389	2.52434	3.32471	3.53761	3.44903	4.88112	4.07881	2.83193	2.80627	1.72144	1.71281	1.38242	1.38391	1.48543	1.26949
PF10_0308	1.62967	1.38936	0.989603	0.859787	0.753796	0.711105	0.611	0.731797	0.565262	0.518452	0.372667	0.394947	0.463712	0.33	0.332515	0.160033	0.255377	0.382	0.185606	0.252	0.170614	0.247865	0.209301	0.245241	0.342353	0.385	0.383869	0.622742	0.789333	0.920544	1.36816	1.6146	2.1045	2.47181	2.3391	2.56335	3.03124	3.85885	2.87591	2.87491	1.84527	1.94615	1.54737	1.52431	1.46067	1.30624
PF10_0309	0.9646	0.954964	0.960818	0.986204	0.963251	0.998676	0.9054	1.1524	1.00133	1.17831	0.973	0.905021	0.997004	0.7698	0.802244	0.672838	0.725798	0.7768	0.823138	0.7954	0.855919	0.931037	0.995082	1.12006	1.20427	1.1552	1.14828	1.25989	1.1628	1.21042	1.29588	1.32557	1.4445	1.42706	1.31979	1.16939	1.17325	1.33075	0.846849	0.92204	0.699988	0.730169	0.74678	0.816252	0.747246	0.928306
PF10_0310	0.566	0.623005	0.676178	0.607206	0.667335	0.785725	0.6205	0.92718	0.614283	1.21931	0.893	0.980913	1.51928	0.982	1.12887	1.07058	1.32237	1.1765	1.18519	1.202	1.12029	1.34782	1.62028	1.52703	1.58608	1.296	1.5793	1.37248	1.397	1.08818	0.883083	0.952475	1.09265	0.962616	1.07724	0.882629	0.616191	0.713672	0.5135	0.655621	0.698653	0.661814	0.74345	0.731784	0.762226	0.704072
PF10_0311	1.017	0.929858	0.54832	0.894364	0.684383	0.682357	0.531	0.644171	0.802993	0.632008	0.452	0.53563	0.640748	0.464	0.517713	0.533831	0.583093	0.714	0.598765	0.785	0.729212	0.79691	0.979746	0.95964	1.0746	1.132	1.11333	1.32766	1.382	1.42633	1.98283	1.83586	1.81018	1.88968	1.92568	1.60411	1.75699	1.37953	1.07022	1.32558	0.939631	0.900857	0.923142	0.832068	0.856009	0.781923
PF10_0312	1.472	1.2495	0.951595	0.732443	0.617406	0.549183	0.311	0.310244	0.300634	0.242013	0.377	0.220705	0.153779	0.344	0.25591	0.0934497	0.147965	0.253	0.145579	0.231	0.214584	0.289955	0.601741	0.633362	0.877057	1.072	1.34132	1.37876	1.758	1.89199	2.14135	1.81118	2.12181	2.40465	2.41471	1.62609	1.66018	1.52178	1.54676	1.81567	1.5794	1.62918	1.38127	1.25727	1.2966	0.92967
PF10_0314	1.653	1.59819	1.70868	1.78746	1.84978	1.89487	1.448	1.73358	1.46933	2.05942	1.639	1.42491	1.98632	1.254	1.45633	1.13775	1.37224	1.353	1.17368	1.097	0.980024	0.920375	1.01403	0.946045	0.863122	0.809	0.820437	0.663382	0.613	0.707146	0.483046	0.562602	0.569407	0.586081	0.606869	0.606121	0.510222	0.662269	0.645998	0.696027	1.10959	1.26568	1.3273	1.34552	1.211	1.20471
PF10_0315	0.737	0.699718	0.721033	0.506005	0.505372	0.540305	0.475	0.766137	0.489344	0.773825	0.632	0.782149	1.15335	0.824	1.06405	1.04897	1.55309	1.618	1.60877	1.429	1.75197	1.67519	2.16518	1.67137	1.68198	1.365	1.37627	1.34828	1.086	0.645459	0.631242	0.690914	0.602109	0.689507	0.590175	0.709582	0.580868	0.72204	0.599368	0.718185	0.677408	0.711203	0.868029	0.967308	0.897551	0.873981
PF10_0316	0.449	0.446913	0.404533	0.377606	0.253904	0.293616	0.262	0.266431	0.311046	0.209642	0.2	0.176822	0.232093	0.1925	0.273588	0.271004	0.356213	0.6595	0.593008	0.794	0.895956	0.918972	1.6072	1.41507	1.69428	1.717	2.06233	2.1291	2.1945	1.84272	1.83604	1.46285	1.42736	1.39086	1.14402	0.947178	0.911858	0.849354	0.667607	0.649755	0.694404	0.590694	0.570074	0.743245	0.5627	0.570531
PF10_0317	0.622	0.584648	0.808227	1.18152	0.666117	0.915728	0.98	1.16993	1.88189	1.62781	1.379	1.11772	1.26868	1.153	1.10109	1.09453	0.868064	0.999	0.851267	0.951	1.04969	0.678122	0.833596	0.994827	1.01558	1.183	1.22317	1.28104	1.254	1.65653	1.50917	1.48876	1.24269	1.23896	1.15187	0.782829	0.727393	0.60967	0.466302	0.658228	0.513519	0.493891	0.668244	0.631501	0.650819	0.695548
PF10_0318	0.667	0.814788	0.98094	1.08032	0.818337	1.24803	1.117	1.21374	1.8025	1.72646	1.897	1.18871	1.36266	1.307	1.25514	0.742925	0.778188	0.73	1.52735	1.25	0.958659	0.892314	1.40737	1.3387	1.24755	1.452	1.27143	1.17885	1.191	1.01633	1.26342	1.09477	1.06187	0.868347	0.807194	0.578653	0.544237	0.498495	0.350295	0.479659	0.520803	0.545256	0.912808	0.785078	0.809432	0.726234
PF10_0319	0.636	1.03447	0.934827	0.967735	1.25064	0.977876	0.807	1.33571	0.573938	1.41662	0.999	1.06868	1.60329	0.936	0.883058	1.06649	1.32073	1.001	0.996023	0.867	0.92243	1.43762	1.31535	1.22594	1.37214	1.12	1.34881	1.2676	1.423	1.0231	0.951084	0.875158	1.07533	1.17324	1.42585	0.836849	0.643664	0.713672	0.52658	0.534403	0.580289	0.657204	0.72795	0.856136	0.918951	0.987632
PF10_0320	0.8255	0.868836	0.906531	1.15211	0.962947	0.769871	0.70475	0.786564	0.745404	0.94096	1.027	0.705031	0.888504	0.83	1.09751	0.815056	1.08782	1.2725	1.38567	1.2035	1.22108	1.29708	1.42677	1.49464	1.64038	1.29625	1.24501	1.35948	1.283	1.06298	1.21184	0.928005	1.14386	1.11802	1.2923	0.905976	0.806216	0.830825	0.66448	0.660509	0.761781	0.754336	0.810332	0.814017	0.859471	0.812325
PF10_0322	0.971	0.886852	0.935666	1.28525	1.08381	1.00705	0.959	1.41031	1.09582	1.75421	1.229	1.51783	2.08741	1.302	1.49084	1.52673	1.54322	1.547	1.58163	1.507	1.5411	1.54799	1.5039	1.3379	1.33034	1.454	1.18905	1.09996	1.121	0.892208	0.777563	0.701607	0.722339	0.639948	0.635346	0.590556	0.550778	0.682591	0.551601	0.625642	0.691976	0.678277	0.862288	1.00169	1.20471	0.984223
PF10_0323	0.576	0.495149	0.502208	0.52245	0.431088	0.582159	0.628	0.943758	1.25459	1.66018	1.356	1.80565	2.17	1.688	1.93784	1.60617	1.49829	1.779	1.77244	1.586	1.28286	0.985848	0.907573	0.768512	0.790171	0.894	0.803795	0.789783	0.963	0.900483	0.987664	1.06927	1.07149	0.876966	0.836654	0.810297	0.69207	0.578589	0.448104	0.490086	0.473457	0.47677	0.546536	0.613163	0.551371	0.592125
PF10_0324	0.593	0.636952	0.827511	1.01454	0.941332	0.820604	0.751	0.909418	1.49797	1.17307	1.196	1.26615	1.70724	1.413	1.84188	1.58164	1.97835	2.243	1.88183	2.451	2.24802	1.72477	1.84762	1.52343	1.42378	1.418	1.25063	0.981626	0.924	0.843309	0.880738	0.682689	0.527086	0.469726	0.436003	0.32595	0.395095	0.339502	0.247936	0.303697	0.34963	0.392479	0.456978	0.550128	0.516123	0.634176
PF10_0325	0.533	0.774106	0.857693	1.44338	1.17149	0.934753	1.116	1.4932	1.78819	1.89603	1.816	1.75919	2.43342	1.875	2.25016	2.02903	2.24907	2.216	2.12282	2.472	2.07524	1.81924	1.80612	1.27552	1.19427	1.176	0.922783	0.696551	0.647	0.486727	0.454907	0.323249	0.266429	0.251023	0.29656	0.248125	0.209322	0.219959	0.194482	0.25156	0.354486	0.375357	0.53161	0.696828	0.737679	0.694411
PF10_0326	0.923	1.05539	1.46889	1.54079	1.61719	1.69828	1.382	1.87449	1.59688	2.27677	1.502	1.7721	2.16003	1.356	1.31911	1.3889	1.72407	1.07	1.00178	1.169	1.14073	1.27393	1.18093	1.09319	1.19427	0.975	1.07589	0.956525	1.005	0.841052	0.885428	0.671996	0.727148	0.713208	0.695248	0.583231	0.477515	0.485345	0.431045	0.636069	0.648272	0.852127	0.75321	1.27905	1.18205	1.07173
PF10_0327	1.004	1.10072	1.37583	1.24351	1.39434	1.93165	1.208	2.12198	1.11013	2.11183	1.426	1.83405	2.38501	1.286	1.24588	1.45548	1.64516	1.122	1.16545	1.279	1.23084	1.5377	1.5048	1.37069	1.52132	1.098	0.936929	0.909909	1	0.519828	0.608731	0.447449	0.58672	0.521439	0.407525	0.431243	0.319216	0.381342	0.390101	0.479659	0.548725	0.754666	0.693504	1.2183	1.10904	1.15356
PF10_0328	1.1525	1.00948	1.4668	1.34597	1.36146	1.36725	1.263	1.38544	1.69318	1.63397	1.37	1.35973	1.70439	1.291	1.29512	1.21017	1.23798	1.1895	1.24318	1.383	1.24477	1.25569	1.38121	1.29631	1.25739	1.235	1.04718	0.968627	0.922	0.824878	1.03175	0.694616	0.719453	0.572614	0.584283	0.482058	0.411448	0.460839	0.397494	0.523975	0.630062	0.686838	0.779618	0.893957	0.964899	1.0007
PF10_0329	1.233	0.746211	1.1176	0.699552	0.758667	0.83836	1.158	0.860868	0.951358	1.11295	1.572	1.12289	1.62892	1.653	1.76696	1.44613	1.47746	1.551	1.77327	1.095	1.1751	1.47971	1.11417	1.16996	1.06148	1.2	0.857881	1.07468	1.117	0.691348	0.629366	0.72217	0.78582	0.941607	1.08706	0.677537	0.693814	1.06991	0.658509	1.12485	1.21399	1.11422	1.0127	0.952408	1.11407	0.684183
PF10_0330	0.9115	0.993204	1.01406	0.722322	0.786067	0.659527	0.571	0.505627	0.542703	0.573432	0.6605	0.465934	0.37021	0.3245	0.40491	0.183979	0.147965	0.5815	0.347909	0.193	0.17371	0.328304	0.550318	0.599775	0.71476	0.8825	1.1125	1.407	1.595	1.42558	2.50011	2.00242	2.52771	2.28345	2.43288	1.54185	1.01717	1.03823	0.655097	0.685599	0.681657	0.811298	0.732543	0.822441	0.70306	0.609741
PF10_0331	0.994	1.1414	1.12012	1.15875	1.82786	1.8936	1.072	1.87449	1.13226	1.55998	1.104	1.77468	1.39256	1.082	0.96303	1.02561	0.945882	0.926	0.654694	0.687	0.858334	1.46007	0.799314	1.22914	1.1164	0.923	1.08587	0.909013	1.031	1.13369	1.61609	1.17702	1.63031	1.59879	1.60064	1.0749	0.66198	0.955149	0.729023	0.698634	0.814589	1.07734	0.74058	0.475631	0.642007	0.656906
PF10_0332	0.575	0.548616	0.541613	0.612266	0.338538	0.341178	0.21	0.313797	0.257686	0.246637	0.238	0.17295	0.215006	0.393	0.518554	0.287358	0.472393	0.507	0.798628	0.734	0.812816	0.748272	1.28738	1.17236	1.45985	1.464	1.52105	1.84492	1.812	1.72649	2.34488	1.44352	1.77651	1.62896	1.44549	1.05018	0.986429	0.822457	0.508382	0.606091	0.730824	0.591352	0.672837	0.602848	0.64956	0.638722
PF10_0334	0.535	0.392865	0.393214	0.385829	0.289828	0.206736	0.194	0.22025	0.236863	0.191144	0.126	0.221996	0.405807	0.338	0.587583	0.591069	0.739827	1.159	1.29212	1.452	1.76404	1.33099	2.02445	1.69776	1.68444	1.899	1.46031	1.76155	1.512	1.57754	1.87966	1.50767	1.44949	1.38225	1.05957	0.842343	0.939331	0.836802	0.482224	0.669958	0.429754	0.349016	0.515536	0.563881	0.563959	0.662589
PF10_0335	0.391	0.391121	0.570957	0.403539	0.319054	0.299324	0.2495	0.209	0.16203	0.168022	0.2855	0.144556	0.302575	0.364	0.607786	0.378471	0.629127	0.858	0.790815	1.0155	1.00511	1.01905	1.52465	1.53063	1.5328	1.6965	1.61175	2.01525	1.8855	1.52939	1.28875	1.36661	1.46295	1.44365	1.46218	1.09047	0.743746	0.886412	0.612447	0.684948	0.63249	0.474135	0.644706	0.626916	0.592283	0.467108
PF10_0336	0.858	0.797353	0.620423	0.537631	0.578438	0.594843	0.334	0.373003	0.380023	0.345292	0.263	0.414307	0.374482	0.261	0.483198	0.325906	0.475681	0.548	0.528032	0.508	0.603806	0.90728	1.18995	1.44346	1.45985	1.151	1.45116	1.78486	1.549	1.08028	1.60015	1.16222	1.75631	1.55031	1.67625	1.26535	1.41946	1.52896	1.27949	1.17308	1.04525	1.11949	0.788804	1.03493	1.00581	1.00354
PF10_0337	1.011	0.863605	0.696719	0.762803	0.56626	0.754651	0.53	0.479576	0.402147	0.346834	0.566	0.203927	0.252027	0.509	0.541283	0.172882	0.22688	0.663	0.384098	0.623	0.5137	0.474217	0.596328	0.896464	0.887712	1.027	1.07256	1.40027	1.199	1.49328	2.39459	1.84326	1.94002	2.26891	2.38034	1.64165	1.7256	1.54211	1.18509	1.47938	1.09866	1.25778	1.14015	0.869889	1.04358	0.785332
PF10_0338	0.681	0.636952	0.545805	0.631242	0.466404	0.462937	0.481	0.406159	0.365707	0.325253	0.306	0.216833	0.417198	0.598	0.830024	0.517478	0.692697	1.185	1.09637	1.133	1.31908	1.16824	1.51112	1.56901	1.2746	1.389	1.19987	1.43524	1.265	1.22697	1.32251	1.18031	1.235	1.21633	1.26971	1.19393	1.2834	1.15957	0.82342	1.0675	0.837655	0.837639	0.871473	0.752987	0.733902	0.552347
PF10_0340	0.947	0.868255	1.0631	1.21821	1.1106	0.914459	0.999	1.19598	1.22206	1.08366	0.749	0.767952	0.969665	0.68	0.638933	0.599246	0.675161	0.842	0.750924	0.809	0.933578	1.09248	1.28197	1.25393	1.22378	1.5	1.37627	1.5204	1.473	1.60161	1.44632	1.2494	0.996462	0.8468	0.809158	0.753531	0.469666	0.614452	0.52203	0.563078	0.583931	0.574231	0.773877	0.973038	0.913916	0.917168
PF10_0341	1.09	0.994948	1.42865	1.1499	1.37486	1.30003	1.294	1.4707	1.50968	1.77733	1.853	1.65206	1.52213	1.559	1.4336	1.1798	1.23414	1.367	1.03139	1.249	0.914999	0.859577	1.14935	0.956441	0.99673	0.894	0.840407	0.670554	0.698	0.676302	0.96703	0.643208	0.5973	0.656109	0.650076	0.733388	0.616191	0.607279	0.605055	0.780749	1.15572	1.16031	1.08504	1.34208	1.46655	1.03537
PF10_0342	1.197	1.08096	0.750377	0.718527	0.695343	0.541573	0.41	0.53227	0.366357	0.325253	0.2005	0.212961	0.285489	0.1525	0.167099	0.07768	0.0948075	0.172	0.0801918	0.082	0.0664187	0.10429	0.182236	0.301087	0.431561	0.5275	0.745965	1.05648	1.3065	1.26572	2.32753	2.00118	2.82058	3.05807	2.90423	2.549	2.86117	2.5122	1.80038	1.83326	1.15451	1.4955	1.02877	1.07046	1.05805	1.17232
PF10_0345	1.791	1.85855	0.773014	1.25236	0.968122	0.70265	0.519	0.637066	0.347486	0.391537	0.263	0.276204	0.307559	0.151	0.131322	0.0922816	0.103028	0.13	0.0756682	0.11	0.0743146	0.0832453	0.101944	0.141547	0.218035	0.228	0.379431	0.556703	0.688	0.826007	1.21653	1.32343	2.16028	3.10386	2.47068	2.19284	2.88995	3.71779	4.09549	5.68031	3.76216	3.85498	2.17352	1.97014	2.23947	1.54793
PF10_0346	2.901	2.48621	1.03711	1.28399	1.07772	0.880215	0.695	0.596806	0.490646	0.439323	0.333	0.314925	0.287625	0.14	0.124588	0.106299	0.100836	0.112	0.0986976	0.069	0.0724568	0.0785686	0.039695	0.0391853	0.0245904	0.029	0.0565819	0.172121	0.255	0.601074	1.24185	1.65244	2.23434	3.37535	2.61798	2.29538	4.06738	5.00886	4.94393	8.01604	4.63017	4.38312	2.52142	1.92201	2.08589	1.54453
PF10_0347	1.02	0.838034	0.772176	0.755213	0.786676	0.769871	0.779	0.592069	0.689767	0.71679	1.734	0.716325	0.757506	1.68	2.33518	0.525654	0.746403	1.03	0.496778	0.339	0.148629	0.108499	0.229149	0.255904	0.309839	0.529	0.549177	0.799644	0.89	1.0878	1.76617	1.77664	2.05929	2.28722	2.47559	1.85224	2.04481	1.53972	1.0452	1.4846	0.849795	1.07866	1.38701	0.863013	1.23618	1.15356
PF10_0348	2.471	2.06312	0.995193	1.21821	1.01074	1.02227	0.527	0.502075	0.445095	0.289799	0.242	0.207799	0.200768	0.145	0.117011	0.0829366	0.0997396	0.105	0.0583961	0.051	0.0631674	0.0869866	0.17953	0.211921	0.311478	0.458	0.553337	0.80323	0.908	1.12993	1.53918	2.03491	2.64024	2.78711	2.47952	2.34849	2.99984	3.9509	3.50977	4.39514	2.69264	2.8593	2.33082	1.92659	2.83742	1.5843
PF10_0352	2.8885	2.22468	1.2115	1.59392	1.10634	0.882117	0.8685	0.853171	0.745729	0.570349	0.443	0.423341	0.380889	0.185	0.169204	0.143679	0.144677	0.152	0.0744344	0.078	0.114259	0.0897926	0.084803	0.0735724	0.113116	0.167	0.159761	0.251009	0.3565	0.603707	1.29203	1.65737	2.15115	2.62874	2.35677	2.10631	3.08684	4.00768	4.70055	7.82965	4.82016	4.54907	2.78378	1.95754	2.49376	1.7275
PF10_0355	2.232	1.561	2.10189	1.35483	1.29814	0.958851	0.883	1.14388	0.661135	0.749161	1.067	0.614361	0.898471	0.752	0.841809	0.321233	0.444992	0.796	0.61357	0.725	0.407802	0.279667	0.399657	0.338273	0.513939	0.69	0.425196	0.546842	0.672	0.666523	0.904187	0.938492	1.29655	2.04482	1.88051	1.71215	1.79886	2.23067	2.24621	3.3511	2.29323	3.02788	1.7705	1.72603	2.60453	1.3911
PF10_0357	1.194	1.24833	1.15784	1.17393	1.28961	1.2049	0.945	1.41978	1.075	1.59852	1.045	1.30616	1.61468	1.015	1.02364	0.940337	1.14317	0.968	1.02317	0.974	0.952156	0.97743	1.14935	1.0684	1.20411	0.984	0.98935	0.906323	0.901	0.898226	0.813205	0.61771	0.794477	0.812325	0.8396	0.7224	0.706461	0.962322	0.841618	1.01667	0.985762	1.2288	1.00696	1.16444	1.32052	1.13311
PF10_0359	0.6295	0.405069	0.592756	0.322578	0.253904	0.394448	0.4605	0.396686	0.61168	0.537207	0.7965	0.722778	1.12558	1.149	1.64447	1.63946	1.96575	2.6415	2.28074	3.007	2.34648	2.10171	2.81745	2.03684	1.94469	1.6995	1.4807	1.12327	1.032	0.901235	0.74708	0.697494	0.528048	0.540293	0.651549	0.569039	0.404907	0.500886	0.371335	0.494648	0.572398	0.568963	0.685467	0.794247	0.772297	0.673954
PF10_0360	0.5945	0.524788	0.48502	0.466157	0.292263	0.308202	0.2545	0.274128	0.218643	0.189603	0.1465	0.123905	0.158763	0.179938	0.186882	0.0992903	0.121112	0.39	0.308019	0.4365	0.582905	0.534079	0.927421	1.29272	1.33649	1.593	1.61966	2.01032	2.2575	2.18914	2.139	2.22285	1.94002	1.6936	1.62274	1.25024	0.813738	0.958736	0.695472	0.769018	0.611853	0.614401	0.965624	0.90771	0.94161	0.775104
PF10_0361	1.5395	1.53194	1.84366	1.50284	1.55935	1.76297	1.3265	2.05033	1.23768	2.08177	1.4635	1.49202	1.97137	1.2955	1.28334	1.35152	1.58433	1.288	0.995612	0.9495	0.922895	0.984913	0.714962	0.860877	0.930745	0.7975	0.775504	0.677277	0.604	0.584524	0.364864	0.419072	0.4713	0.559147	0.590175	0.57087	0.534425	0.659878	0.697178	0.875247	1.4052	1.59494	1.57876	2.22859	2.25709	1.73432
PF10_0362	0.57	0.493987	0.444357	0.345349	0.401862	0.280299	0.346	0.342216	0.18871	0.286716	0.18	0.212961	0.291896	0.191	0.480673	0.30488	0.430744	0.75	0.725427	0.789	0.620527	1.22623	1.49307	1.64658	1.691	1.684	2.14595	1.41731	1.549	2.11091	1.29625	1.28888	1.50046	1.34023	1.2049	0.949467	0.690762	0.863101	0.583446	0.716882	0.660412	0.667741	0.555722	0.539813	0.512347	0.360276
PF10_0363	0.467	0.484688	0.417528	0.375709	0.245988	0.315812	0.175	0.272352	0.244672	0.42545	0.607	0.49691	0.989599	1.078	1.43781	1.68443	2.16358	1.92	2.64098	2.739	2.97444	2.54038	2.35374	2.45748	1.93116	1.719	1.34715	1.30615	0.915	0.932079	0.734417	0.633338	0.63385	0.525749	0.564643	0.526464	0.423877	0.535553	0.570935	0.603484	0.606997	0.678277	0.497165	0.515745	0.478358	0.470518
PF10_0366	0.718	0.72064	0.895422	1.28905	0.737965	0.840897	1.06	1.30137	1.6151	1.72492	1.576	1.43265	1.82684	1.403	1.45465	1.48585	1.51911	1.245	1.52077	1.818	1.85322	1.53957	2.2978	1.48264	1.27624	1.517	1.0917	0.97804	0.978	0.678559	0.654691	0.527233	0.443406	0.406162	0.439931	0.357996	0.379396	0.372974	0.291154	0.375385	0.489239	0.584767	0.632651	0.991376	1.00707	0.909213
PF10_0367	2.004	1.9899	1.24336	1.40543	0.774498	0.923338	0.693	0.702194	0.606474	0.499441	0.481	0.323959	0.324646	0.32	0.537074	0.320065	0.507467	0.396	0.436737	0.596	0.474685	0.615454	0.786683	0.938848	0.418856	0.579	0.473457	0.45092	0.467	0.583772	0.959526	1.30451	1.7265	2.04913	1.88051	1.75427	3.42372	2.84513	3.49271	4.65061	3.06776	2.98442	2.11496	1.46128	1.78629	1.13311
PF10_0368	2.153	1.88354	1.01825	1.11258	1.11425	0.859922	0.7975	0.692721	0.69237	0.490963	0.558	0.316215	0.27125	0.4795	0.513083	0.207341	0.287546	0.6285	0.347292	0.2775	0.265675	0.277328	0.193513	0.219118	0.163526	0.321	0.223415	0.40789	0.5415	0.868887	1.63485	1.42501	2.17471	3.46208	2.97837	2.75867	4.04318	4.08837	2.78473	3.28658	2.58945	2.09278	1.42605	0.593679	0.77985	0.764307
PF10_0369	1.1385	1.0891	1.2421	1.5313	1.32919	1.11802	1.2395	1.45471	1.65023	1.67868	1.3945	1.34488	1.55061	1.1685	1.2947	1.14184	1.20619	0.989	1.17697	1.1985	1.06642	1.06301	1.33294	1.11878	1.05493	1.0545	0.884507	0.904978	0.761	0.759806	0.826337	0.681044	0.828141	0.803167	0.789518	0.634046	0.628619	0.80572	0.618134	0.675172	0.736894	0.904809	0.897881	0.932352	1.13232	1.06662
PF10_0372	1.346	1.44244	1.14778	1.36495	1.04971	1.0451	0.917	1.05744	1.36912	1.39196	1.076	1.08675	1.27153	0.781	0.852753	0.744093	0.752979	0.813	0.769019	0.846	0.786806	0.741725	0.953583	0.751718	0.938532	0.999	1.07755	1.27118	1.528	1.53917	1.814	1.61789	1.93137	1.79703	2.09163	1.47593	1.33704	1.27433	0.964448	1.01797	0.960268	1.00754	1.0127	1.15756	1.18834	0.93308
PF10_0373	0.861	0.761321	1.22156	0.748888	1.06189	1.20617	0.874	1.34281	0.982592	1.72646	1.213	1.59398	1.91228	1.255	1.2282	1.49636	1.58816	1.026	1.3209	1.163	1.15188	1.72664	1.39203	1.29471	1.29427	0.908	0.971876	0.922459	0.878	0.495002	0.516812	0.466367	0.601147	0.691661	0.641238	0.606121	0.545545	0.817675	0.71765	0.871989	1.10838	1.51723	1.38586	1.64694	1.41116	1.60249
PF10_0374	1.191	1.22044	1.19725	1.07526	1.31031	0.976607	0.732	1.23032	0.640312	1.06362	0.811	0.779568	0.972513	0.729	0.769413	0.440382	0.612686	0.715	1.01247	0.672	0.595446	0.607971	0.767738	0.760515	0.761482	0.756	0.782993	0.851639	0.88	0.923051	1.17526	0.968925	1.11092	1.28205	1.32077	1.09688	1.14342	1.19543	1.12367	1.67229	1.41673	1.9703	1.57761	2.10882	1.97134	1.22744
PF10_0376	3.905	3.50324	1.36661	1.58	1.08137	0.953777	0.809	0.873894	0.645518	0.514856	0.489	0.44012	0.392992	0.193	0.302209	0.114476	0.134813	0.385	0.104455	0.169	0.13098	0.183327	0.11277	0.114357	0.173772	0.169	0.143951	0.135366	0.256	0.436324	1.01393	1.15728	1.82172	2.14609	2.12699	1.57298	2.60475	3.65085	5.10316	7.28873	5.18618	6.19274	3.11158	2.41483	2.94694	1.74683
PF10_0377	1.315	1.67258	1.49614	1.58127	2.21511	1.86697	1.286	1.77621	1.30145	1.48291	1.345	0.838939	0.983904	0.695	1.00428	0.748766	0.9963	1.218	1.48046	1.225	1.10543	1.57698	1.74207	1.48904	1.55657	1.301	1.16492	0.922459	1.07	0.376142	0.347981	0.59468	0.512659	0.471881	0.401633	0.242631	0.304825	0.33233	0.824558	0.714275	0.815803	1.01794	1.3296	2.07559	2.15261	0.798971
PF10_0378	2.556	2.17006	4.03359	3.2359	3.40365	2.96914	3.319	3.35703	3.02196	4.08802	2.851	2.72591	2.88194	1.687	1.65163	1.14476	1.24949	0.686	0.559286	0.514	0.444959	0.412485	0.556633	0.361464	0.325413	0.453	0.336995	0.307486	0.282	0.29339	0.241992	0.233595	0.178901	0.265029	0.30147	0.364405	0.362388	0.506863	0.448104	0.620428	1.20792	1.24987	1.72228	2.11341	2.00785	1.90935
PF10_0379	0.528	0.414949	0.45358	0.546486	0.302005	0.507328	0.3179	0.264063	0.291524	0.450113	0.461	0.303309	0.457067	0.873	0.85612	0.609759	0.82751	1.145	1.26004	1.442	1.23084	1.08687	1.62208	1.46345	1.24837	1.826	1.7349	1.98297	1.753	1.57077	1.557	1.05776	1.17248	1.31006	1.07528	0.839596	0.732626	0.890596	0.477675	0.531796	0.768458	0.705935	0.733691	0.767886	0.738937	0.597807
PF10_0380	0.921	1.14372	1.43536	1.06008	1.44914	1.85936	1.525	1.95264	2.11615	3.95853	3.544	3.5016	5.49904	4	4.23935	3.59548	3.89533	4.632	4.1453	3.071	1.75475	1.83888	0.715413	1.03641	0.681973	0.397	0.236312	0.200807	0.081	0.120365	0.166018	0.237707	0.205833	0.232708	0.244515	0.200514	0.17269	0.339502	0.168324	0.340193	0.457675	0.563694	0.593612	0.0767886	0.309674	0.336409
PF10_0406	0.675	0.791541	1.22005	0.851354	1.15931	0.82314	1.091	1.44702	1.33008	1.27172	1.407	1.51525	1.13626	1.156	1.36121	0.98239	1.06864	1.205	0.873108	0.724	0.838827	0.874824	1.14033	0.894065	0.837712	0.976	0.824597	1.05155	0.96	0.619129	0.892931	0.665416	0.739652	0.909287	0.84942	0.753531	0.892234	1.02329	1.08387	1.23955	1.3791	1.78986	1.46164	2.00911	2.78203	2.61399
PF11_0014	1.373	0.929858	0.848219	0.800753	0.719699	0.667137	0.566222	0.599174	0.636408	0.571891	0.822	0.487875	0.553891	1.085	1.19284	0.377303	0.464721	0.845	1.26497	0.937	0.727355	0.567751	1.42361	0.935649	1.02952	1.473	1.35796	1.99821	1.779	1.54068	1.63391	1.23213	1.67937	1.52553	1.53288	1.2507	1.14473	1.3616	1.05885	1.71791	1.65953	1.27226	1.24693	0.876766	1.51438	0.829657
PF11_0036	0.991	0.905449	0.613716	1.09677	0.641762	0.754651	0.712	0.734166	1.12835	1.00813	1.008	1.15386	1.39113	1.192	1.3671	1.38773	1.40293	1.745	1.75106	1.715	1.68137	1.10464	1.47774	1.13797	1.05984	1.268	1.07422	1.00762	0.995	1.072	1.11147	0.988665	0.988767	0.831717	0.739437	0.585978	0.753558	0.87386	0.824558	1.10269	0.854651	0.812616	0.921993	0.898542	0.90888	0.810336
PF11_0037	1.67	1.79579	1.41524	1.79379	2.33567	2.13585	1.34	2.01777	1.68928	2.09025	1.479	2.06379	1.28434	1.055	0.938617	0.942674	0.820934	1.138	1.06264	0.978	0.628888	0.568687	1.15386	0.850881	1.08935	1.174	1.10667	0.970868	0.996	0.616872	0.52713	0.554376	0.534781	0.61086	0.727653	0.686693	0.705153	0.931241	0.925779	1.13267	2.55788	2.9133	1.61779	1.72259	2.02421	1.38428
PF11_0038	2.38	1.89691	2.4448	2.08221	1.97643	1.44842	1.996	1.8437	2.08622	1.70026	1.311	1.37844	1.20603	0.664	0.624622	0.44155	0.362789	0.439	0.264016	0.188	0.229446	0.217092	0.113672	0.0967637	0.0713121	0.062	0.0665669	0.0403408	0.041	0.0662009	0.109741	0.211387	0.240459	0.458953	0.596067	0.681199	1.3619	1.61025	2.14271	2.65246	4.20284	4.35678	4.2747	4.82393	5.10207	3.86984
PF11_0039	3.094	3.65434	3.22956	2.85766	3.58388	3.5031	2.415	3.22382	3.04994	3.26795	2.249	2.78011	1.84678	1.1745	1.09267	1.00809	0.7749	0.5715	0.36148	0.2745	0.229446	0.22074	0.103297	0.10716	0.0795089	0.0645	0.0557498	0.0318244	0.0325	0.0492745	0.113023	0.149698	0.257772	0.556453	0.632891	0.634962	1.13819	1.4136	1.84701	2.90402	3.8866	4.66892	3.01054	1.98332	2.74426	2.38668
PF11_0040	2.29	3.35446	1.14946	1.77355	1.21776	1.77438	1.021	1.18651	1.81422	1.94073	1.278	1.29068	1.42531	0.835	0.842651	1.05832	0.899849	0.857	0.579026	0.39	0.475614	0.0271249	0.242681	0.151943	0.0975418	0.112	0.1115	0.0824745	0.107	0.121118	0.286076	0.343812	0.617499	1.07735	0.981988	0.91559	1.30826	1.19543	1.13732	1.44158	2.16455	2.3957	2.70857	3.52884	3.44544	1.58885
PF11_0043	0.83	0.994948	1.19054	1.33712	1.25308	1.22393	1.345	2.32091	2.37124	2.88103	2.21	2.8511	3.30911	1.766	1.80905	1.93324	1.69667	1.405	1.427	1.549	1.45471	1.33754	1.3361	1.0572	1.17132	0.856	0.834582	0.769164	0.84	0.49425	0.725038	0.416194	0.48188	0.372764	0.376101	0.28658	0.321832	0.272558	0.108045	0.302394	0.370268	0.485989	0.502906	0.936363	0.824538	0.841022
PF11_0044	0.368	0.426572	0.358001	0.352939	0.281303	0.263811	0.237	0.236828	0.138387	0.217349	0.23	0.207799	0.398688	0.372	0.677656	0.599246	0.922866	0.761	1.16381	1.147	1.29215	1.86413	1.65546	2.19758	2.32297	1.727	1.9554	1.96056	1.597	1.38871	1.29438	0.886673	1.08207	0.906055	0.894591	0.726063	0.416027	0.560657	0.420809	0.583933	0.450391	0.472818	0.450089	0.615455	0.516123	0.37505
PF11_0046	1.627	1.382	0.857693	1.74825	2.18954	1.39135	1.684	1.18414	1.36392	1.20698	1.365	1.08933	1.24732	0.947	0.80982	0.692696	0.584189	0.726	0.733652	0.545	0.300045	0.408744	0.547611	0.491016	0.445086	0.497	0.496755	0.369342	0.546	0.482213	0.421141	0.458965	0.495346	0.75738	0.837636	0.816706	1.06492	1.16435	1.27266	0.955408	2.30173	2.26005	1.79117	2.08705	1.74978	1.45588
PF11_0047	0.837	1.10769	1.79839	1.74066	1.80107	1.92151	1.95	2.20486	2.07971	2.53882	2.054	1.96828	1.54634	1.701	1.78043	1.7954	1.86984	1.354	1.9756	1.322	1.71667	2.01192	1.03388	2.05683	1.31968	0.919	0.807956	0.777233	0.627	0.681568	0.779439	0.596325	0.625193	0.623788	0.559733	0.460542	0.456583	0.391384	0.440143	0.407971	0.809733	0.874517	0.750914	0.487092	0.587877	0.593261
PF11_0048	1.063	1.06236	1.27103	1.53826	1.66347	1.57399	1.265	1.32387	1.73873	1.47058	1.155	1.40038	1.42104	1.083	1.35531	1.23704	1.33936	1.26	1.32584	1.337	1.40455	1.52086	1.12138	1.42826	1.20247	1.271	1.09003	0.913495	0.91	1.17582	1.35347	0.931912	0.892584	0.713208	0.705067	0.565835	0.4435	0.496104	0.403749	0.505727	0.633704	0.638766	0.746321	0.452709	0.693619	0.635312
PF11_0049	0.543	0.602083	0.427589	0.364324	0.292263	0.291714	0.192	0.259326	0.161379	0.234306	0.225	0.320087	0.458491	0.443	0.658295	0.834038	0.972188	1.139	1.20493	1.261	1.31258	1.79398	1.41549	1.72255	1.77788	1.842	2.05192	1.86643	1.78	1.9123	1.19589	1.14248	1.56779	1.42318	1.55547	1.15822	0.648897	0.794962	0.714238	0.776839	0.739322	0.686179	0.654466	0.426349	0.532488	0.469381
PF11_0051	0.648	0.592784	0.812419	0.94623	0.858524	0.995632	0.988	1.31321	1.40556	1.89603	1.496	1.61334	2.40921	1.478	1.77538	1.33399	1.40184	1.737	1.5915	1.563	1.38225	1.0588	1.64374	1.0532	1.17788	1.33	1.05176	1.17526	1.223	0.973454	0.853537	0.755893	0.596338	0.44387	0.444841	0.381801	0.294359	0.392101	0.290017	0.443163	0.447963	0.518915	0.636095	0.971892	0.81195	0.839885
PF11_0052	1.709	1.74581	1.34397	1.73686	1.65129	1.65516	1.127	1.66016	1.44591	1.6016	1.121	1.36295	1.79409	0.833	1.00259	1.00926	1.07522	0.904	0.894858	0.932	1.03576	0.925987	1.15296	0.894065	1.06066	0.879	0.827094	0.87674	0.978	0.737237	0.940767	0.787149	0.826217	0.677656	0.638292	0.50449	0.648897	0.757903	0.838206	1.30342	1.46893	1.77669	1.5512	1.90367	1.94616	1.65022
PF11_0053	1.299	1.31342	1.51165	1.36115	2.01053	1.84921	1.4515	2.17052	1.48495	2.32764	1.4745	2.04895	2.20844	1.4395	1.44707	1.56003	1.51528	1.252	1.11364	0.8005	0.995352	1.11025	0.720826	0.998425	0.965582	0.762	0.864537	0.778129	0.7235	0.923427	0.840406	0.727928	0.893546	1.0655	0.97315	0.902772	0.733934	0.736386	0.639174	0.704499	0.893499	1.01478	0.849658	0.912295	0.908251	0.987064
PF11_0054	0.5395	0.560239	0.516461	0.514228	0.404907	0.352593	0.4855	0.398462	0.355946	0.547998	0.488	0.357517	0.446388	0.499	0.515608	0.46024	0.626387	0.6495	0.805619	0.8235	0.767299	1.06442	1.36858	1.78893	1.74674	1.6285	1.76319	2.27567	1.813	1.69677	1.51855	1.42213	1.47738	1.36716	1.33599	0.830898	0.490598	0.681396	0.38612	0.480962	0.516554	0.566329	0.542518	0.446406	0.431152	0.62963
PF11_0055	0.633	0.699718	0.695042	0.898159	0.875572	0.918264	0.931	1.24453	1.47064	1.6201	1.21	1.46879	1.37547	1.108	1.05479	1.13308	1.00616	1.014	0.91213	0.854	0.894562	0.916633	0.812846	1.11718	1.10657	1.155	1.39042	1.40745	1.315	1.54444	1.62172	1.29135	1.18594	1.27128	1.16464	0.852414	0.620116	0.570221	0.454928	0.464018	0.566935	0.522866	0.583279	0.471047	0.64956	0.698957
PF11_0056	1.17	0.963565	1.25761	1.31814	1.42113	1.43067	1.073	1.64358	1.87018	2.06251	2.565	1.65723	1.57624	2.023	1.77117	1.10154	1.0237	1.186	0.903083	1.016	0.824893	0.675315	0.955488	0.758915	0.704104	1.619	0.948578	1.54281	1.46	0.917785	1.17901	0.797019	0.907973	1.11614	1.01341	0.736134	0.766641	0.817675	0.711963	0.543527	1.04282	0.991733	1.00811	0.994814	1.1254	0.85466
PF11_0060	1.457	1.36805	0.688335	0.846294	0.725787	0.558061	0.511	0.61812	0.419066	0.516397	0.315	0.285239	0.390144	0.221	0.482357	0.191572	0.250993	0.483	0.203975	0.398	0.246167	0.344205	0.340114	0.391853	0.372954	0.419	0.372775	0.470643	0.801	0.598065	0.934201	1.06927	1.28597	2.16764	1.7882	1.42191	2.64661	4.41473	3.15379	2.46738	2.42799	2.37463	1.43408	2.41254	1.4892	1.19334
[truncated: 2,492 more rows]
